# Supplementary material for: HDAC7 is a potential therapeutic target in acute erythroid leukemia
Source: Leukemia. 2024 Sep 15;38(12):2614–27. doi: 10.1038/s41375-024-02394-5 (PMC11588653; doi:10.1038/s41375-024-02394-5)
Supplement: Supplementary file 3 — Supplemental Dataset [file 41375_2024_2394_MOESM3_ESM.xlsx]

## Sheet: ERG F36P TPM
	F36P ERG 1	F36P ERG 2	F36P ERG 3	F36P Vector 1	F36P Vector 2	F36P Vector 3
TRNP	8.37317	7.93297	7.79234	9.40852	15.2979	9.64004
TRNT	1.0209	0.756573	0.641264	0.96619	0.736695	0.298529
CYTB	10.2995	10.2735	7.5484	7.28441	11.6091	6.98957
TRNE	0.17903	0.174484	0.155803	0.121442	0.313358	0.145353
ND6	116.919	128.281	85.0767	85.1754	160.251	60.0094
ND5	37.7125	39.7192	24.6902	26.5539	47.7225	24.3091
TRNL2	0.576095	0.507708	0.234149	0.615124	0.186649	0.192526
TRNS2	0.772954	1.1921	0.314161	1.54747	1.09563	0.113013
TRNH	0.137724	0.160528	0.149873	0.168401	0.249879	0.142904
ND4	1043.64	1108.12	677.995	789.188	1302.41	575.329
ND4L	957.839	976.176	575.775	568.017	1128.99	607.421
TRNR	0.347994	0.237433	0.104939	0.329618	0.203671	0.137868
ND3	23.0035	22.2472	24.9487	22.8975	29.5629	21.656
TRNG	0.192537	0.285373	0.15651	0.299027	0.293753	0.122839
COX3	1196.56	1183.49	704.365	994.568	1180.97	691.149
ATP6	295.133	316.942	207.467	209.454	347.197	158.172
ATP8	50.8041	60.1498	33.1362	29.6601	57.4633	21.2434
TRNK	0.09392	0.0662167	0.0152692	0.106968	0.051121	0.0146474
COX2	617.161	624.738	410.351	538.537	667.235	364.978
TRND	0.881828	0.506835	0.186998	0.573129	0.278251	0.0896914
TRNS1	0.0198304	0.0640801	0.029553	0.0317608	0.0269844	0.0193293
COX1	645.791	648.765	296.042	585.037	538.966	302.57
TRNY	0.0654986	0.132583	0.06073	0.0917909	0.139262	0.0658384
TRNC	0.599012	0.647989	0.373287	0.763356	0.752904	0.52885
TRNN	10.3851	10.5082	4.91532	10.0285	9.80243	6.85303
TRNA	0.0121085	0.0320133	0.00984278	0.00646439	0.0109845	0.014163
TRNW	0.104499	0.0857426	0.0497956	0.0307802	0.0457648	0.0295037
ND2	984.402	1066.86	799.573	808.439	1295.46	644.572
TRNM	0.0664356	0.0910765	0.036003	0.0867001	0.0803581	0.0345369
TRNQ	0.436386	0.480729	0.709462	0.349463	0.296908	0.255214
TRNI	0.0320233	0.0282219	0.0165653	0.0341928	0.0448965	0.0476723
ND1	2659.88	2816.66	1678.67	2050.39	3165.83	1451.59
TRNL1	14.9166	13.199	6.05049	10.8434	8.14651	7.26101
RNR2	136.769	143.507	39.5986	150.786	87.564	43.9688
TRNV	0.408765	0.386601	0.145878	0.361941	0.280377	0.116615
RNR1	4.42219	4.28318	1.63339	6.87245	4.04461	2.02981
TRNF	0.0214966	0.00947239	0.0524228	0.0803353	0.0975057	0.050288
LILRP2	0	0	0	0	0	0
KIR3DL3	0	0	0	0	0	0
KIR2DS2	0	0	0	0	0	0
KIR2DL2	0	0	0	0	0	0
KIR2DL4	0	0	0	0	0	0
KIR3DS1	0	0	0	0	0	0
KIR2DL5A	0	0	0	0	0	0
KIR2DS5	0	0	0	0	0	0
KIR2DS1	0	0	0	0	0	0
KIR3DL2	0.0236011	0	0	0	0	0
KIR2DL3	0	0	0	0	0	0
KIR2DP1	0	0	0	0	0	0
LOC101928804	0	0	0	0	0.0139929	0
KIR2DL1	0	0	0	0	0	0
KIR3DP1	0	0	0	0	0	0
KIR3DL1	0	0	0	0	0	0
KIR2DS4	0	0	0	0	0	0
KIR2DL5B	0	0	0	0	0	0
RNU6-222P	0	0	0	0	0	0
NCR1	6.14215	3.74748	1.92033	1.51345	3.17175	1.9895
FCAR	0.00682858	0.00200599	0	0.0024304	0.0020649	0
LOC102725023	0	0	0	0	0	0
KIR2DS3	0	0	0	0	0	0
EPS8L1	1.11539	1.03093	0.647341	1.59497	0.457687	0.682692
RDH13	3.74732	3.77229	3.18634	2.26009	2.73569	3.37447
GP6	0.873173	0.915131	0.36112	0.216141	0.133012	0.223975
GP6-AS1	0.0295694	0.0430544	0.0256041	0.0192181	0.0169111	0.00977445
RPL36AP50	0.00295578	0.0182344	0.0120136	0.00631206	0.00536281	0.0103719
NLRP2	1.64679	1.4139	0.572722	0.580077	0.269522	0.605663
NLRP7	0.0196391	0.0153847	0.00886906	0.00465991	0.00989781	0.0102095
LILRP1	0.0297276	0.0404888	0.0681015	0.0230847	0.0318713	0.0600599
LOC102724290	0	0	0	0	0	0
LILRB4	0	0	0	0	0	0
VN1R105P	0	0	0	0	0	0
MIR8061	0	0	0	0	0	0
LILRB1	0	0	0.000547731	0	0	0
LILRA1	0	0	0	0	0	0
LILRA2	0.0391555	0.0416964	0.00795721	0.0313561	0.00888019	0.00763318
LOC105372461	0	0	0	0	0	0
LOC107985347	0	0.00107234	0	0	0	0
KIR3DX1	0	0	0	0	0	0
LOC105372460	0	0	0	0	0	0
LAIR2	0	0.000569185	0	0	0	0
CDC42EP5	0.0758452	0.0133683	0.0616533	0.0971802	0.0825656	0.0177428
LENG9	1.52919	1.8071	1.58207	2.56051	1.38724	2.03256
LENG8	3.57501	3.75072	2.12676	2.77709	1.73182	2.18782
LENG8-AS1	0.0235063	0.0218062	0.00854826	0.0184938	0.00729514	0.00868252
TTYH1	0.0467556	0.0235459	0.0217182	0.0784508	0.00605935	0.0312508
LAIR1	2.0376	1.67116	0.258503	0.301824	0.117532	0.0137765
LILRA4	0.0309654	0.0409343	0.0125856	0.0330632	0.0561819	0
VN1R104P	0	0	0	0	0	0
LILRA5	0	0	0	0	0	0
LILRA3	0	0	0	0	0	0
MIR4752	0	0	0	0	0	0
LILRB2	0.0216397	0.0343276	0.0351811	0.0138634	0.0117786	0.00506227
LOC100420187	0	0	0	0	0	0.000389468
LILRB5	0	0	0	0	0	0
LOC107987463	0	0	0	0	0	0
LILRA6	0.0260041	0.0458343	0.0528457	0.0555315	0	0.0304162
LOC100421130	0.0218338	0	0.00887416	0.0699388	0	0
LOC107987462	0	0	0	0	0	0
RPS9	258.902	257.197	248.8	364.026	228.6	237.391
TSEN34	31.3284	31.3858	33.5552	36.7043	31.7892	33.0241
MBOAT7	11.6209	12.1079	13.3062	8.84359	8.52907	7.86321
TMC4	0.028326	0.0187226	0.00822347	0.0108018	0.0082596	0.0141995
LENG1	0.194291	0.192366	0.207657	0.218979	0.196928	0.202006
LOC102724273	0.0315619	0.0208614	0.0256562	0.0140417	0.0238601	0.0461464
CNOT3	4.40693	4.00826	3.94468	3.71349	3.52739	3.86406
PRPF31	2.10484	2.24608	2.96978	2.40928	2.84362	3.29542
TFPT	2.4773	2.27226	2.30285	2.50705	1.91005	2.04205
NDUFA3	2.26114	2.13156	3.34464	2.81012	3.00121	3.12714
OSCAR	0.934521	0.781179	0.0391151	1.80637	0.080412	0.0829441
TARM1	0	0.184161	0	0	0	0
VSTM1	0.330367	0.315824	0.0705514	0.0239152	0.00253983	0.013099
LOC107987461	0	0	0	0	0	0
HCG23	0	0	0	0	0	0
BTNL2	0	0	0	0	0	0
TSBP1-AS1	0	0	0.0656427	0	0	0
HLA-DRA	1.20145	1.19315	0.284245	4.10701	1.39087	1.62553
LOC102725035	0	0	0	0	0	0
LOC112268246	0	0.00155495	0	0	0	0
ZBTB9	8.94943	8.76339	12.1247	7.64458	9.95289	12.5227
MIR5004	0	0	0	0	0	0
SYNGAP1	41.6946	46.577	28.4245	31.8249	25.6189	24.1508
CUTA	31.0635	33.9106	36.4826	40.8409	35.4398	34.1182
PHF1	28.6397	31.789	21.5968	34.9335	22.7894	24.9224
RPL12P1	1.41202	0.663681	0.612165	1.00512	0.597775	0.33032
KIFC1	35.8993	35.302	40.2283	28.6944	35.0508	31.2754
SMIM40	0	0	0	0	0	0
RPS18	182.844	185.891	171.461	271.936	155.529	177.664
VPS52	57.4932	54.524	48.9894	50.8607	49.6966	49.0847
HCG25	0.0237863	0.0188664	0.0154684	0.0253977	0.0151048	0.0194755
LOC105375022	0.230253	0.184473	0.136123	0.178802	0.0949452	0.122419
ZNF70P1	0	0	0	0	0	0
COL11A2	0.0377218	0.0566046	0.0273485	0.0261259	0.0221969	0.0143099
HLA-DPB2	0	0	0	0	0	0
COL11A2P1	0	0	0	0	0	0
HLA-DPA2	0	0	0	0	0	0
RPL32P1	0	0	0	0	0	0
HLA-DPB1	0.266223	0.23462	0.039347	0.206734	0.24151	0.0849257
HLA-DPA1	0.00922643	0.00696958	0.00535716	0.0232214	0.00418498	0.00770851
HLA-DOA	0	0	0	0	0	0
BRD2	0.258589	0.247859	0.294785	0.209732	0.248034	0.259197
HLA-DMA	0.329935	0.311173	0.282314	0.803461	0.204789	0.385916
HLA-DMB	0.000701242	0.0001236	0	0.00014975	0.000127229	0
HLA-Z	0	0	0	0	0	0
LOC100294145	12.9036	12.7933	10.9087	10.7467	7.25758	9.28218
PPP1R2P1	0	0.00354184	0	0.0128736	0.0145834	0.00470083
PSMB9	0.0243354	0.0231973	0.0121113	0.0206812	0.00405485	0.00348544
TAP1	0.0187953	0.0182429	0.0137299	0.0248145	0.0118663	0.0145572
PSMB8-AS1	0.00361033	0.0102795	0.00338629	0.00741331	0.0020155	0.00227387
PSMB8	0.370644	0.358685	0.342376	0.424158	0.264647	0.23751
TAP2	2.35979	2.17142	2.58586	2.02973	2.20021	2.81431
HLA-DOB	0	0.000761444	0	0.000307514	0	0
HLA-DQB2	0.0112627	0.00496286	0	0	0	0
MIR3135B	0	0	0	0	0	0
HLA-DQA2	0	0	0	0.032735	0	0
LOC102725019	0	0	0	0	0	0
HLA-DQB1	0.0340012	0.0349591	0.00921301	0.344894	0.0771124	0.0795405
HLA-DQA1	0.0167926	0.0295984	0	0.0358606	0.0152338	0
LOC107987459	0	0	0	0	0	0
HLA-DRB1	0.0664394	0.0915821	0.0138481	0.19827	0.0911808	0.12155
FAM8A5P	0	0	0	0	0	0
HLA-DRB7	0	0	0	0	0	0
LOC100294316	0	0	0	0	0	0
PRKRAP1	0	0	0	0	0	0
HLA-DRB8	0	0	0	0	0	0
HLA-DRB4	0	0	0	0	0	0
HLA-DRB9	0	0	0	0	0	0
RNU6-603P	0	0	0	0	0	0
HNRNPA1P2	0.00855375	0.00251278	0.00231774	0	0.00387986	0.00166752
TSBP1	0	0	0	0.00418435	0	0
NOTCH4	0.0589816	0.031188	0.0191781	0.0377865	0.0749092	0.0551914
GPSM3	8.47812	8.26338	5.11885	6.11294	4.11923	2.63991
PBX2	26.1772	26.3017	26.6557	22.2125	26.2998	21.2288
AGER	1.70916	1.65652	0.945866	1.50183	0.85065	0.767756
MIR6833	0	0	0	0	0	0
RNF5	0.695385	0.700102	0.632038	1.06448	0.709433	0.739669
MIR6721	0	0	0	0	0	0
AGPAT1	0.928548	0.943396	0.933478	0.99515	0.737157	0.899851
EGFL8	0.00130553	0	0	0.00418192	0.00118434	0.00305408
PPT2-EGFL8	0.0438625	0.0247396	0.0356551	0.0543275	0.0461574	0.0451482
PPT2	5.16609	5.09004	4.50912	7.58257	8.50212	6.63085
LOC100507547	0.137893	0.109371	0.0336272	0.132511	0.225166	0.0645157
PRRT1	3.58608	4.54305	2.2774	4.30766	3.45652	2.49051
TNXB	0.322879	0.289362	0.0583251	0.117416	0.111786	0.0738905
CYP21A2	0.0048226	0.0062335	0.00235213	0.0130449	0.00320828	0.00225635
C4B	0.811253	0.792945	0.636564	0.707288	0.53645	0.561498
STK19B	0.234638	0.245557	0.154971	0.172243	0.159643	0.188685
TNXA	1.73493	3.10164	0.604413	1.42905	0.629552	0.46384
CYP21A1P	0.0502843	0.0332363	0.0141491	0.0340731	0.0201765	0.0113108
C4B_2	0	0	0	0	0	0
STK19	1.47114	1.3861	1.02086	1.62189	0.786641	0.902346
DXO	0.504533	0.492069	0.317165	0.470477	0.279196	0.291135
SKIV2L	1.60151	1.74432	1.79922	1.66456	1.58076	1.86702
MIR1236	0	0	0	0	0	0
NELFE	12.3061	10.3261	11.0676	14.1532	10.3472	11.8292
CFB	0.0338339	0.0242267	0.0171894	0.0158051	0.00383665	0.0123671
C2-AS1	0	0	0	0	0	0
C2	0.116331	0.128503	0.0628265	0.101241	0.0187934	0.0307554
LOC107986588	0.0133048	0.0136797	0.0126178	0	0.0181046	0.0285308
EHMT2	1.14292	1.20384	1.47693	0.978102	1.05921	1.52004
SLC44A4	0.400937	0.66949	0.257301	0.157721	0.24886	0.0493647
NEU1	7.05774	6.55496	5.25343	8.89482	5.42796	4.83328
VARS1	13.4254	14.0806	17.2192	13.5272	18.9605	17.3889
VWA7	0.359013	0.271196	0.150087	0.131429	0.186107	0.0599897
SAPCD1-AS1	0.0798396	0.046908	0	0	0.0482855	0
SAPCD1	0	0	0	0	0	0
RNU6-850P	0.134539	0.0893558	0.0665698	0.0624582	0.0707538	0.0729817
MSH5	0.0656567	0.0123991	0.064808	0.0400599	0.0680708	0.0493694
MSH5-SAPCD1	0.00571646	0.0151136	0.00154894	0.0142421	0.00345721	0
LOC105375020	0.0619872	0.0645613	0.0824538	0.0361018	0.051121	0.00659134
CLIC1	137.812	133.685	134.946	117.974	102.007	106.108
DDAH2	11.6288	11.2152	10.4554	7.65035	4.83885	5.00007
MPIG6B	37.4224	39.5825	16.0345	18.6782	9.08235	9.45395
LY6G6C	0.0556058	0.0659682	0.0417241	0.0274029	0.0213417	0.0100062
LY6G6D	0.0531342	0.00520297	0.00959821	0	0	0.00690552
LY6G6E	1.11146	1.07979	0.298792	0.270993	0.2223	0.276388
LY6G6F	0.395366	0.508131	0.24104	0.123127	0.0896663	0.134881
LY6G6F-LY6G6D	0.0289773	0.0127687	0.0588879	0.077351	0	0
MIR4646	0	0	0	0	0	0
LOC105375018	0.182589	0.183902	0.098949	0.0835538	0.118314	0.14238
ABHD16A	3.98006	4.22544	2.97801	3.97765	2.19928	2.79503
LOC105375019	0.014797	0.0177825	0.00546739	0.00574527	0.00610157	0.00157343
LY6G5C	0.0384464	0.0602355	0.0312525	0.0364898	0.0426281	0.0349765
LY6G5B	0.4202	0.343328	0.337591	0.409426	0.401199	0.38546
CSNK2B	0.870489	0.842939	0.857221	0.977251	0.884117	0.857606
GPANK1	6.63148	5.79003	6.47876	6.32503	5.80653	4.85917
C6orf47	1.33596	1.36783	1.64494	1.26914	1.42582	1.47072
APOM	0.0103731	0.0243778	0.0168642	0.0332274	0.0407774	0.0323549
BAG6	17.3518	17.6748	18.3424	18.1809	18.237	18.3376
MIR6832	0	0.0324546	0	0.039321	0	0.0430746
SNORA38	0.00439999	0.011633	0	0.00939616	0.0159662	0.00514655
PRRC2A	11.6526	12.4118	12.5493	10.7974	12.2833	13.0127
AIF1	1.86354	1.90172	1.30568	1.2842	0.919545	0.788897
UQCRHP1	0	0	0	0	0	0.0202119
NCR3	0.155656	0.114315	0.105442	0.166201	0.141207	0.121378
LST1	35.4527	33.3828	15.6363	28.4383	16.1077	9.96895
LTB	0.189248	0.178696	0.219766	0.151552	0.147155	0.0632452
TNF	0	0.00298837	0	0	0.00615227	0
LTA	0.0122828	0.0108247	0.00713178	0.00562068	0.00795901	0.00410482
LOC100287329	0.0128609	0.00647668	0.00597395	0.00588522	0.00166672	0.010745
NFKBIL1	0.342585	0.321124	0.187131	0.38252	0.19339	0.189601
ATP6V1G2	0.0053706	0.0236653	0.00595319	0.0151181	0.00575789	0.00628184
DDX39B-AS1	0.0044977	0.00594568	0.00914027	0.012006	0.0163208	0.0105217
SNORD84	1.68098	1.95549	2.07699	0.789738	1.95192	1.49431
SNORD117	0.00250568	0.00441646	0.00407365	0	0.00340962	0.00146541
DDX39B	0	0	0	0	0	0
ATP6V1G2-DDX39B	0.00766827	0.00788431	0.00727232	0.00818777	0.0104347	0.0209285
MCCD1	0	0	0	0	0	0
RPL15P4	0	0	0	0	0	0
PPIAP9	0	0	0.00175123	0	0	0
MICB	0.642871	0.729442	0.917781	0.433305	0.535811	0.44647
MICB-DT	0.0375714	0.0220742	0.0145434	0.0210135	0.0129843	0.00837072
HCG26	0	0	0	0	0	0
HCP5	0.0104208	0.00459189	0.00423546	0	0	0
HLA-X	0	0	0	0	0	0
LINC01149	0.0590098	0	0	0	0	0
MICA	0.155827	0.152379	0.230781	0.26895	0.121998	0.244687
MICA-AS1	0.0219401	0.0295721	0.0209821	0.0303166	0.0245866	0.0181149
LOC105379664	0	0	0	0	0	0
MIR6891	0.066292	0	0	0	0	0
HLA-B	13.3341	14.2304	9.72502	20.74	4.99185	11.2936
LINC02571	0	0	0	0	0	0
RPL3P2	0.981869	1.53833	0.665121	1.31048	0.618559	0.957054
USP8P1	0.0884408	0.109119	0.0143784	0.0755459	0.0320924	0.124136
HLA-C	21.495	21.3856	15.2202	29.2865	10.9907	18.9501
HCG27	0.915198	1.41147	0.325478	1.77118	0.674573	0.267621
PSORS1C3	0.0275939	0	0.067292	0	0	0
POU5F1	0.227745	0.20071	0.555391	0.364762	1.13632	0.799162
TCF19	20.5286	18.6041	24.2494	16.9529	19.1504	22.0239
RNU6-1133P	0	0	0	0	0	0
HCG22	0	0	0	0	0	0
MUC22	0	0	0	0	0	0
LINC00243	0.02808	0.0494933	0.0228257	0	0.0254734	0
HCG20	0	0	0	0	0	0
RN7SL353P	0	0	0	0	0	0
IER3	0.19556	0.246207	0.0908385	0.238638	0.760313	0.130709
IER3-AS1	0.0275785	0.0486094	0.0896726	0.0883407	0.050037	0.0645157
FLOT1	66.3353	74.502	52.266	71.8221	48.3043	45.2577
TUBB	287.061	299.903	528.589	273.802	465.398	504.667
MDC1-AS1	0	0	0	0	0	0
MDC1	36.7853	36.6617	47.6074	24.6708	37.7846	40.3749
LOC107987457	0	0	0	0	0	0
DHX16	17.5005	16.4497	20.0972	19.6259	20.8548	21.6205
C6orf136	6.71363	6.69109	6.97176	8.40699	7.68477	7.27715
PTMAP1	0.0611643	0.0539035	0.198878	0	0	0.143084
ATAT1	6.76018	7.14183	5.35872	6.81467	5.67556	6.3847
MRPS18B	33.6572	31.5391	27.9751	43.2664	35.2138	30.0658
PPP1R10	49.8246	50.1875	53.8728	43.5559	50.3623	49.7751
MIR877	0	0	0	0	0	0
ABCF1	124.34	114.563	172.803	118.367	183.525	187.345
ABCF1-DT	0.169977	0.149799	0.0690857	0.136119	0.192748	0.149113
PRR3	11.3324	12.1628	15.3278	10.9454	15.3994	16.0328
GNL1	19.0639	18.8701	18.7991	18.4253	19.4581	17.9173
LINC02569	0.0976694	0.129113	0.0396969	0	0.088603	0
HLA-E	136.536	131.098	56.9731	96.1352	33.1358	32.4765
RANP1	34.0958	31.327	39.8048	41.0048	49.193	43.275
SUCLA2P1	0	0	0.0446867	0	0	0
LOC105375012	0	0	0	0	0	0
MICC	0	0	0	0	0	0
UBQLN1P1	0	0	0	0	0	0
HLA-N	0	0	0	0	0	0
RPP21	0.172018	0.166758	0.167797	0.165304	0.140445	0.261566
TRIM39-RPP21	0	0	0	0	0	0
TRIM39	1.64653	1.7149	1.59193	1.82467	1.98026	1.72163
HCG18	2.76669	2.8048	2.91782	1.78599	2.66571	3.18325
HLA-L	0.0806211	0.0284203	0.131071	0	0.0146274	0.207461
HCG17	0.033146	0.0292113	0.0808316	0.0353916	0.0601383	0.03877
PAIP1P1	0	0.0622646	0.0287157	0.150876	0.0961397	0.0413196
TRIM26	5.52902	5.23273	7.53872	6.41253	7.6225	8.72905
TRIM15	10.0541	9.67175	8.00013	11.9448	14.4198	13.085
TRIM10	0.467511	0.48423	0.322536	0.542471	0.48906	0.418702
TRIM40	5.03283	5.45335	4.82885	2.02618	4.3411	3.37765
TRIM31-AS1	0	0	0	0	0.00605321	0
TRIM31	0.0330905	0.0291624	0.0201741	0.0618316	0.0150094	0.00967628
RNF39	0.0624423	0.059263	0.0481554	0.0718013	0.0493837	0.0393277
PPP1R11	13.1269	13.127	14.8122	12.5762	11.3102	12.1291
POLR1H	10.6485	9.82932	12.5639	13.8852	12.3204	12.4272
ETF1P1	0	0	0.104891	0.275555	0.117058	0
HLA-J	0.274493	0.257685	0.155222	0.223003	0.0811998	0.104696
HCG4P3	0.261947	0.169291	0.12776	0.130524	0.0792105	0.142983
ZNRD1ASP	2.47642	3.32112	2.42149	2.52923	1.82328	1.84711
LOC353007	0.0152134	0.00670372	0	0	0	0
MCCD1P2	0	0.00574516	0.00529921	0.0348034	0	0
DDX39BP2	0.0111945	0.00493279	0	0.0119529	0.0101553	0
HCG9	0	0	0	0.0894387	0	0
HLA-A	1.47427	1.53345	0.918673	2.05683	0.326042	0.788373
HLA-K	0.0536307	0.0708965	0	0.200424	0	0.0627304
HCG4B	0	0	0	0	0	0
DDX39BP1	0	0	0	0	0	0
HLA-H	7.00261	6.33686	4.01297	7.62026	3.04242	4.80148
HCP5B	0.0600495	0.0132303	0	0.0801471	0.0408564	0
LOC105375010	0	0.0236322	0.0217978	0.028632	0	0.0156826
HCGVIII-2	0	0	0	0	0	0
HLA-G	0.00853609	0.00553146	0.00673477	0.00965053	0.00296083	0.00792882
MICG	0	0	0	0	0	0
RPL7AP7	0.0349757	0	0	0	0	0
HLA-P	0	0	0	0	0	0
HCG4P9	0	0	0	0	0	0
HLA-V	0	0	0	0.00983576	0	0
HCG4	0	0	0	0	0	0
LOC353010	0	0	0	0	0	0
LOC105379663	0	0	0	0	0	0
IFITM4P	0	0	0	0	0	0
MICE	0	0.030309	0.0559128	0	0	0
HLA-F-AS1	0	0.0521293	0	0	0	0.0345937
HLA-F	0.0415029	0.0142241	0.0243656	0.0517004	0.0125501	0.0134847
ZDHHC20P1	0	0	0	0	0	0
ZFP57	0.381269	0.378797	0.377252	0.307992	0.332922	0.38416
MOG	0.0157041	0.0276797	0.0127656	0.0100608	0.00854778	0.00734745
SUMO2P1	0.808083	0.824672	1.00485	0.860423	0.850253	0.895122
GABBR1	32.6723	36.494	21.9301	22.9776	11.7916	15.0888
OR2I1P	0.00495148	0.0043637	0.0100624	0.00793039	0	0
GPR53P	0	0	0	0	0	0
LINC01015	0	0.00745151	0	0	0	0
LINC02829	2.27673	2.14484	2.19108	0.838266	0.344231	0.535667
RPS17P1	0.0433769	0.044599	0.00587673	0.00771926	0	0.0169123
MAS1L	0.612262	0.638377	0.364511	0.119699	0.093875	0.141212
LOC105375008	0.0715058	0.0848807	0.0735471	0.0296052	0.0132384	0.0204829
MAS1LP1	0.0490911	0.0803466	0.0855115	0.0174723	0.00848269	0.0246088
UBDP1	0	0	0	0	0.0384834	0
OR2H1	0.0711089	0	0	0	0	0
LOC105379641	0	0	0	0	0	0
OR10C1	0	0.000999359	0	0	0	0
OR11A1	0	0.0032576	0.00300474	0	0.00335326	0
OR12D1	0	0	0	0	0	0
OR12D2	0	0	0	0	0	0
OR12D3	0	0	0	0	0	0
OR5V1	0	0	0	0	0	0
DDX6P1	0	0	0	0	0	0.00351897
OR14J1	0	0	0	0	0	0
OR2B4P	0	0	0	0	0	0
LOC105375005	0	0	0	0	0	0
OR2U2P	0	0	0	0	0	0
OR2U1P	0	0	0	0	0	0
OR2G1P	0	0	0	0	0	0
LOC101929006	0	0	0	0	0	0
OR2H4P	0	0	0	0	0	0
OR2J4P	0	0	0	0	0	0
OR2J2	0	0	0	0	0	0
OR2N1P	0	0	0	0	0	0
OR2J3	0	0	0	0	0	0
OR2J1	0	0	0	0	0	0
OR2B3	0	0	0	0	0	0
SAR1AP1	0	0.00219134	0	0	0	0
OR2P1P	0	0	0	0	0	0
OR2W1	0	0	0	0	0	0
LOC100129636	0.00187384	0	0	0	0	0
OR2AD1P	0	0	0	0	0	0
LOC105375002	0	0	0	0	0	0
ZNF311	0.472293	0.216438	0.0767839	0.121029	0.017138	0.110486
TRL-AAG3-1	0	0.0236322	0	0	0	0.0313652
HCG15	0.111	0.0376245	0.145757	0.11852	0.0464753	0.0299617
TRE-CTC1-6	0	0	0	0	0	0
TRF-GAA1-2	0	0	0	0	0	0
RN7SL471P	0	0	0	0	0	0
KRT18P1	0.0190703	0	0	0	0	0
TRM-CAT3-2	0	0	0	0	0	0
TRK-TTT3-3	0	0	0	0	0	0
TRM-CAT3-1	0	0	0	0	0	0
LINC01556	0.00112717	0	0	0.00601766	0.00306761	0
TRL-AAG2-2	0	0	0	0	0	0
TRQ-CTG1-3	0	0.00298234	0	0	0	0
TRL-CAA1-2	0	0	0.0253619	0	0	0
RNU6-930P	0.000437987	0	0	0	0	0
TRIM27	1.53163	1.50009	1.90689	1.81419	1.91206	2.14729
HCG14	0	0.00110827	0	0	0	0
TRL-CAA1-1	0	0	0	0	0	0
ZNF90P2	0	0	0	0	0	0
TRR-CCG1-2	0	0	0	0	0	0
TRA-AGC2-2	0	0	0	0	0	0
RPL13P	0	0	0	0	0	0
LINC01623	0	0	0	0	0	0
TRA-AGC2-1	0	0	0	0	0	0
TRF-GAA4-1	0	0	0	0	0	0
TRA-TGC5-1	0	0	0	0	0	0
TRF-GAA3-1	0	0	0	0	0	0
TRA-TGC7-1	0	0	0	0	0	0
TRA-AGC1-1	0	0	0	0	0	0
TRF-GAA1-1	0	0	0	0	0	0
TRA-TGC1-1	0	0	0	0	0	0
NOP56P1	0.066545	0.0195485	0.144249	0.0473688	0.120736	0.0778358
TRA-AGC23-1	0	0	0	0	0	0
TRA-TGC6-1	0	0	0	0	0	0
TRK-TTT7-1	0	0	0	0	0	0
TRR-CCG1-1	0	0	0.000677071	0	0	0
RPSAP2	0	0	0	0	0	0
TRA-CGC4-1	0	0	0	0	0	0
TRF-GAA11-1	0	0	0	0	0	0
TRT-AGT3-1	0	0	0	0	0	0
TRA-AGC7-1	0	0	0	0	0	0
TRA-CGC5-1	0	0	0	0	0	0
TRK-TTT13-1	0	0	0	0	0	0
LOC100288016	0	0	0	0	0	0
LOC105374297	0.546517	0.309626	0.0634649	0.333452	0.354132	0.0456604
LOC105374298	0.0333611	0.0245007	0.0143126	0.0385896	0.041193	0.0379376
SDHAP2	0.135429	0.116387	0.132653	0.10778	0.135067	0.137746
MIR570	0.213658	0.188295	0.360718	0.350973	0.342921	0.269134
SMBD1P	0.0519802	0.0577203	0.0278876	0.0765924	0.0462119	0.0279679
MIR570HG	0.151921	0.139708	0.112756	0.105792	0.089882	0.0231781
MUC20	0.00254287	0.00224101	0	0.0162909	0.00230682	0
MUC4	0.0101856	0.00224413	0.00206994	0.00543784	0	0
LOC112268340	0	0	0	0	0	0
LYPLA2P1	0.562459	0.524288	0.677029	0.565917	0.794809	0.657894
MYL12BP3	0	0.00189977	0	0	0	0
DAXX	0.61725	0.583289	0.916027	0.537613	0.859403	0.843942
ZBTB22	0.805364	0.753215	0.618403	0.70198	0.530381	0.519068
TAPBP	1.58928	1.66095	1.30645	1.75343	1.2978	1.21455
RGL2	3.20285	3.14946	1.7328	2.28749	1.15931	1.09689
MIR6834	0	0	0	0	0	0
PFDN6	0.230253	0.256544	0.381083	0.302701	0.342487	0.391445
MIR6873	0	0	0	0	0	0
WDR46	1.677	1.56958	2.62496	1.85168	2.0591	2.57585
B3GALT4	0.0699444	0.0880592	0.0893462	0.0586795	0.108774	0.040906
RING1	0.650767	0.622779	0.533067	0.609334	0.555542	0.56796
MIR219A1	0	0	0	0.000606685	0	0.000664598
HSD17B8	0.137404	0.171302	0.178891	0.18846	0.13985	0.236503
SLC39A7	0.381616	0.350734	0.509369	0.396115	0.477544	0.512866
RNY4P10	0.0386099	0.170133	0.219698	0.206128	0.175129	0.180644
RXRB	7.9456	8.03432	7.44846	7.1741	5.35334	6.55454
HCG24	0	0	0	0	0	0
LOC105375021	0	0	0	0	0	0
RNU1-116P	0	0	0	0	0	0
HLA-DRB2	0	0	0	0	0	0
HLA-DRB3	0	0	0	0	0	0
LOC105379657	0	0	0	0	0	0
RNA5SP206	0	0	0	0	0	0
C4A	0.361537	0.364402	0.301441	0.299444	0.227208	0.249479
ZBTB12	1.40391	1.35168	2.26923	1.11776	1.47971	1.67059
SNORD52	0.925482	1.30499	0.82754	0.691726	1.51123	2.38152
SNORD48	0.00500666	0.00735388	0.00813966	0.0160375	0.0151397	0.0126883
SNHG32	60.4953	60.7531	31.8161	93.9825	30.5978	30.2954
HSPA1B	2.91528	3.07307	17.8613	4.09172	15.8446	21.797
HSPA1A	1.79919	1.72775	12.661	2.5268	10.2673	16.2535
HSPA1L	0.00502218	0.006639	0.0231339	0.00714989	0.0189833	0.0166439
LSM2	2.93386	2.60633	2.88865	2.93998	2.98532	3.04629
LOC105379656	0	0	0	0	0	0
DHFRP2	0.00523192	0	0.00425294	0	0	0
CCHCR1	0.499957	0.475227	0.532683	0.531921	0.563694	0.682946
POLR2LP1	0	0	0	0	0	0
PSORS1C2	0	0	0	0	0	0
CDSN	0	0	0	0	0	0
PSORS1C1	0	0	0	0	0	0
C6orf15	0	0	0	0	0	0
MUC21	0	0	0	0	0	0
NAPGP2	0	0	0	0	0	0
HCG21	0	0	0	0	0	0
MUCL3	0	0	0	0	0	0
SFTA2	0	0	0	0	0	0
VARS2	1.3065	1.45425	1.44785	1.34415	1.68061	1.48639
GTF2H4	0.932222	0.967615	1.09669	1.02579	0.965492	1.27516
MIR4640	0	0	0	0	0	0
DDR1	0.0377917	0.0237896	0.0965494	0.0230583	0.0440789	0.164186
LINC02570	0	0	0	0	0	0
RPL7P4	0	0	0.0208656	0	0	0
NRM	0.0963224	0.0976035	0.105885	0.0818011	0.0702367	0.0839051
PPP1R18	0.211362	0.217688	0.159084	0.12775	0.0989805	0.0917491
TRIM26BP	0	0	0.172048	0	0.0960024	0
MICD	0	0	0	0	0.0126683	0.016334
HLA-W	0.000816295	0.000359697	0.000165888	0.000871596	0	0
MICF	0	0	0	0	0	0
LOC107987452	0	0	0	0	0	0
RPL23AP1	0	0	0	0	0	0
HCG4P11	0	0	0	0	0	0
OR2H2	0.801316	1.18246	0.999788	0.776012	0.355013	0.653915
RPL13AP	0.0352502	0.0310657	0.143271	0.0752765	0	0
SNORD32B	0	0.125516	0	0.0760358	0	0
TMEM183AP1	0.0381333	0.0168033	0.0387474	0.0203584	0.00864837	0.0334526
OR2H5P	0.2808	0.494933	0	0	0	0.164222
UBD	0	0	0	0	0	0
TRV-AAC6-1	0	0	0	0	0	0
LOC112268339	0	0	0	0	0	0
LOC112268337	0	0	0	0	0	0
HLA-DQB1-AS1	0	0	0	0	0	0
LOC107987449	0	0	0	0	0	0
FKBPL	4.43401	5.45443	7.35885	10.2579	13.6594	13.29
ATF6B	31.3233	30.4464	20.6032	28.8721	17.3568	15.8829
LOC110384692	0	0	0	0	0	0
LOC112267902	0	0	0	0	0	0
WASF5P	0	0.0034136	0	0	0	0
LOC107987448	0	0	0	0	0	0
HCG4P8	0	0	0	0	0	0
LOC107987447	0	0	0	0	0	0
HCG9P5	0	0	0	0	0.0715042	0
LOC112268336	0	0	0	0	0	0
LOC100294188	0	0	0	0	0	0
LOC112268335	0	0	0	0	0	0
HLA-S	0	0	0	0	0	0
ZDHHC20P2	0	0	0	0	0	0
RN7SKP186	0	0	0	0	0	0
TMPOP1	0	0.00076588	0	0	0	0
LOC107987443	0	0	0	0	0	0
TCF20	3.07664	3.30709	3.23957	2.27062	3.44759	3.0542
CYP2D8P	0.289164	0.231671	0.0641064	0.140343	0.0715422	0.15374
CYP2D7	0.0515994	0.113685	0.0512652	0.149981	0.0312064	0.0570014
LOC112268333	0	0	0	0	0	0
LOC102723722	0.284904	0.170378	0.115797	0.206425	0.0461531	0.0714096
CYP2D6	0.165317	0.198304	0.115719	0.142194	0.099981	0.0590845
LOC105373047	0.0372424	0.0328214	0.0605476	0.079531	0	0.0435615
OLA1P1	5.75775	5.71304	5.11191	6.64925	5.75116	5.17043
NDUFA6-DT	0.166367	0.115569	0.073187	0.135841	0.115412	0.0641018
NDUFA6	10.6083	10.2264	13.9209	12.5254	12.8259	12.6835
SMDT1	1.01402	0.997946	0.835213	1.36129	0.80277	0.808543
PHETA2	0.00365259	0.001073	0	0	0	0
LOC112268334	0	0	0	0	0	0
MUC2	0	0.0135598	0	0	0	0
LOC107987157	0	0	0	0	0	0
LINC02688	0.0048084	0	0	0	0	0.00281213
MUC6	0.268773	0.207259	0.0409653	0.0358728	0.228585	0.0982428
AP2A2	11.0588	11.6998	12.1172	13.4813	13.0836	11.9219
RNU6-1025P	0	0	0	0	0	0
LOC105377779	0	0	0	0	0.0209305	0
MIR3674	0	0	0.0132193	0	0	0
CLN8	4.95926	5.86346	5.3285	4.50881	5.14479	5.94429
CLN8-AS1	4.26337	4.59971	3.51225	4.67469	3.55543	3.64503
LOC100130321	0	0	0	0	0	0
LOC105377778	0.00212266	0.000935339	0	0	0.000962807	0
DLGAP2	0.00537532	0	0	0	0	0
DLGAP2-AS1	0	0	0	0	0	0
HLA-DPA3	0	0	0	0	0	0
LOC112267927	0	0	0	0	0	0
LOC100294160	0	0	0	0	0	0
LOC107987440	0	0	0	0	0	0
LINC01596	0	0	0	0	0	0
LOC105377619	0	0	0	0	0	0
FRG1-DT	0.0240912	0.0254777	0.01175	0.0274382	0.010199	0.00751436
RNU1-51P	0.00112322	0.000329963	0	0	0	0
LOC105377616	0.00860862	0.00637283	0.00195939	0.00661812	0.000937141	0.00241663
LOC107987311	0	0	0	0	0	0
LINC01262	0	0	0.000854988	0	0	0
LOC105377615	0	0	0	0	0	0
HSP90AA4P	0	0.0010799	0.00348627	0.00130838	0.00389066	0.00501646
LOC105377614	0	0	0	0	0	0
KRT18P53	0	0	0	0	0	0
FABP5P13	0	0	0	0	0	0
LOC102723840	0	0	0	0	0	0
PPP2R3B	3.4031	3.65936	2.57197	3.69322	3.10166	2.46102
LOC101929829	0	0	0	0	0	0
LOC107987438	0	0	0	0	0	0
LOC107987441	0	0	0	0	0	0
LOC105372225	0	0	0	0	0	0
SALL3	0	0	0	0	0	0
LINC01896	0	0	0	0	0	0
LOC105372221	0	0	0	0	0	0
LOC105372220	0	0	0	0	0	0
LOC105372219	0	0	0	0	0	0
WNT9B	1.63743	0.918309	2.29908	0.476827	0.337599	0.261172
LOC101929777	0	0	0.0265697	0	0	0
WNT3	3.17928	3.27719	3.18433	2.546	4.00434	2.27439
RPS7P11	8.74846	8.16766	8.38742	11.4854	8.27141	9.67935
LOC107985026	0.0910142	0.040105	0	0	0.0412828	0
NSF	27.3015	27.4023	23.8711	25.5972	24.1938	25.3302
FAM215B	0.0564593	0.0447814	0.0305966	0.0281327	0.0324383	0.0242143
RN7SL199P	0	0	0	0	0	0
LRRC37A2	0.118108	0.126078	0.0824858	0.083481	0.0845082	0.0700468
ARL17A	0.167592	0.189499	0.190212	0.178946	0.157772	0.258905
RDM1P2	0	0.0640736	0.0295501	0.0194074	0.098933	0.0850402
LOC100132570	0	0	0	0.0183864	0	0
DND1P2	0.0410642	0	0.0667608	0.131538	0.0186261	0.0480316
MAPK8IP1P1	0	0.0182464	0.0841502	0	0.0563466	0.024217
KANSL1-AS1	0.00226534	0.00732023	0.00184146	0.00645017	0.00274008	0.00176647
LOC107985027	0	0.0962521	0.0443904	0.233232	0.0495394	0
KANSL1	0.813961	0.779518	0.660613	0.56913	0.614463	0.580694
STH	0	0	0	0	0	0
LOC105371800	0	0	0	0	0	0
MAPT-IT1	0	0	0	0	0	0
MAPT	0.288448	0.169471	0.547107	0.410652	0.087224	0
SPPL2C	0	0	0	0	0	0
MAPT-AS1	0	0	0	0	0	0
CRHR1	0	0	0	0	0	0
LOC107985028	0	0	0	0	0	0
LOC105371802	0	0	0	0	0	0
ARF2P	0.385239	0.572314	0.277366	0.223298	0.139791	0.154493
LINC02210-CRHR1	0	0	0	0	0	0
LINC02210	0.715594	0.77517	0.605932	0.700401	0.297535	0.261566
RPS26P8	0.780543	0.7965	2.03705	0.745694	2.60874	1.97012
MAPK8IP1P2	0.102363	0.0721691	0.0665672	0.0655785	0.0742885	0.143677
LOC105376839	0.271542	0.143585	0.088293	0	0.0492672	0.0635232
DND1P1	1.0651	1.01376	1.17749	0.818827	0.966231	0.69766
RDM1P1	0.172048	0.18953	0.244746	0.0459259	0.195096	0.15093
LOC102724345	0.521132	0.574087	0.247112	0.231849	0.55155	0.304777
LRRC37A4P	18.7739	20.6627	14.7035	11.2586	8.36004	11.7317
LOC112267925	0	0	0	0	0	0
LRRC37A3	0.0505758	0.0805172	0.0344813	0.0522602	0.0384808	0.0496157
LOC105369225	0.0188395	0.0228293	0.0306287	0.0150869	0.00427267	0.00826352
MIR4315-1	0	0	0	0	0	0
PLEKHM1	17.9294	19.1233	11.5101	12.6154	10.76	9.51784
ARHGAP27	1.90231	1.95545	1.32521	1.10561	0.840809	0.80582
LOC105371796	0	0	0	0.0170497	0	0
RNA5SP443	0	0	0	0	0	0
KRTAP9-12P	0	0	0	0	0	0
KRTAP9-2	0	0	0	0	0	0
KRTAP9-4	0	0	0	0	0	0
KRTAP9-9	0	0	0	0	0	0
KRTAP9-6	0	0	0	0	0	0
KRTAP9-11P	0	0	0	0	0	0
KRTAP9-7	0	0	0	0	0	0
KRTAP9-10P	0	0	0	0	0	0
KRTAP29-1	0	0	0	0	0	0
LOC102724956	0.00639006	0.011263	0.00259719	0	0.00869533	0
TBC1D3I	1.39824	1.0198	0.548709	0.978154	0.393657	0.394773
LOC105371747	0	0	0	0	0	0
CCL4L1	0	0	0	0	0	0
CCL3L1	0	0	0	0	0	0
LOC107987437	0	0	0	0	0	0
LOC105379634	0	0	0	0	0	0
CCL3P1	0	0	0	0	0	0
TBC1D3G	0.0152336	0.0155732	0.0104018	0.0123619	0.0127139	0.00498912
LOC100420853	0	0	0.00246356	0	0	0
YWHAEP6	0	0	0	0	0	0
LOC105379635	0	0	0	0	0	0
CCL4L2	0	0	0	0	0	0
CCL3L3	0	0	0	0	0	0
TBC1D3B	0	0	0	0	0	0
LOC100420851	0.0223724	0.0443624	0.0363724	0.0298601	0.0405913	0.0261684
LOC107985056	0	0	0	0	0	0
LOC100419980	0	0.00123107	0	0.00149153	0	0
LOC107985055	0	0.000538136	0	0	0	0
RN7SL301P	0.0360472	0.0317681	0	0	0	0
CCL4	0.390537	0.594488	0.0865804	0.492812	0.547531	0
LOC101927369	0.107203	0.12597	0.0290479	0.0381553	0.226921	0
CCL3	0	0	0.0843387	0.147708	0.0313738	0
CCL3-AS1	0	0	0	0	0	0
CCL18	0	0	0.0186246	0	0	0
LOC105379599	0	0	0	0	0	0
MIR3183	0	0	0	0	0	0
LOC105371481	0.00062166	0	0	0	0	0
LOC112268190	0.000612488	0.00107956	0.0012447	0.000980973	0.000555632	0.00107462
ABR	0.369081	0.363535	0.311786	0.564083	0.210083	0.19469
TIMM22	0.0939322	0.0850811	0.177103	0.133728	0.221316	0.207532
NXN	0.250368	0.237315	0.294299	0.430805	0.143793	0.489837
RPH3AL-AS1	0	0	0	0	0	0
RPH3AL	0.00438555	0.00386494	0.0106948	0.0187306	0	0
LOC107984761	0	0	0	0	0	0
LOC107984089	0.00263873	0	0	0.00281749	0	0
FMN1	2.29919	2.6082	2.07592	1.97076	1.43622	1.55403
GREM1-AS1	0	0	0	0	0	0
GREM1	0	0	0	0	0	0
LOC105370756	0	0.00697982	0.00643803	0	0	0.00926379
SCG5-AS1	0.0388222	0	0.031558	0	0	0
LOC105379633	0	0	0	0	0	0
SCG5	0	0.036879	0.0680327	0	0.151848	0.0978934
ARHGAP11A-SCG5	0	0	0	0	0.00753878	0
ARHGAP11A	5.43429	5.40042	6.40851	3.99328	6.99522	6.48641
RN7SL286P	0	0	0	0.00476942	0.00405216	0
GOLGA8N	33.9777	32.6827	26.2618	19.1068	14.2219	15.415
LOC101928042	0.133974	0.111125	0.0576558	0.0252442	0.0714928	0.064526
LINC02256	0.339824	0.435958	0.206304	0.220463	0.226331	0.271697
WHAMMP1	0.228784	0.22419	0.113465	0.125229	0.158845	0.15264
LOC107984723	0	0	0	0	0	0
LOC101060588	0	0.00592814	0	0	0	0
RNU6-18P	0	0	0.00236564	0	0	0
LOC107984069	0	0	0	0	0	0
LOC105370754	1.00602	0.110825	0.817777	0.805631	0	0.588357
CHRNA7	0.891857	0.822077	0.480852	0.986288	0.454069	0.686584
DEPDC1P1	0.0663365	0.0584618	0.0616273	0.0202373	0.0429848	0.0332537
LOC105370753	0	0	0.00366595	0	0.00409117	0.0026375
OTUD7A	0.220464	0.275249	0.268818	0.215783	0.233332	0.193403
LOC400347	0.00842925	0	0	0.00900031	0	0
UBE2CP4	0	0	0	0	0	0
LOC105370939	0	0	0	0	0	0
LOC105376707	0.0224793	0.0099054	0	0	0	0
KLF13	1.88671	1.93362	1.64266	1.215	2.99303	0.940869
LOC283710	0.00495495	0	0	0	0.013485	0
LOC107984092	0	0	0	0	0	0
LINC02352	0.0674225	0.0594189	0	0	0.0611639	0.157725
LOC107984779	0	0	0	0	0	0
MIR211	0	0	0	0	0	0
LOC105370752	0	0	0	0	0	0
TRPM1	0	0	0	0	0.0548753	0
RNU6-466P	0	0	0	0	0.071733	0
MTMR10	13.3221	14.7705	7.467	11.2421	10.0875	7.60276
FAN1	8.71585	8.92055	8.12762	8.36579	9.51898	9.39936
LOC388104	0.0289374	0.0280525	0.00823296	0.0123591	0.0170633	0
LOC100629121	0	0	0	0	0	0
HERC2P10	1.72516	1.6098	2.22727	0.43342	1.74914	2.13657
RN7SL82P	0	0	0.0171607	0	0	0
LOC107987436	0	0	0	0	0	0
LOC101930434	1.63696	1.92352	1.64749	0.832316	0.282859	1.09412
LOC107984025	0	0	0	0	0	0
LOC100288637	0.678926	0.697113	0.538872	0.535143	0.695797	0.689238
ARHGAP11B	2.28582	2.27357	1.86408	1.20072	1.74692	1.64202
RN7SL628P	0	0	0	0.0903576	0	0.197966
GOLGA8H	20.3815	22.4658	15.0039	18.039	9.65385	14.6977
ARHGAP11B-DT	0.0374104	0.0200684	0.0145441	0.0347346	0.0177066	0.0209277
ULK4P1	0.261051	0.269024	0.191668	0.227035	0.171884	0.27087
DNM1P29	0.00195647	0.000689687	0.000636152	0.00125341	0.000354971	0.000457685
RN7SL196P	0	0	0	0	0	0
LOC100288482	0.0121838	0.00878519	0.0126051	0.00709592	0.0010048	0.0103644
GOLGA8R	2.85577	3.02944	1.9861	1.53027	1.11303	1.23716
LOC105376704	0.00446697	0.00314936	0.00254179	0.00429263	0.00324185	0.00104498
MPHOSPH10P3	0.00229821	0.0010127	0.000934089	0.00122695	0	0
LOC105370750	0	0	0	0	0	0
LOC101929944	0	0	0	0	0	0
GOLGA8Q	3.48421	3.49483	2.4099	1.86013	1.56306	1.44336
DNM1P50	0.0180368	0.0317913	0.0073309	0.0192587	0.0163625	0.0210971
ULK4P2	0.676691	0.576701	0.489624	0.754294	0.505941	0.774111
LOC105370751	0.120749	0.0456063	0.0350552	0.110511	0	0.0403533
CHRFAM7A	1.20371	1.43681	0.89797	1.43982	0.891548	0.944573
LOC102724055	0.0105488	0.0151681	0.00992892	0.0165988	0.00402931	0.00844226
RNU6-17P	0	0.000858479	0	0	0	0
LOC728424	0.134845	0.0831865	0.065768	0.129582	0.293587	0.141952
LINC02249	0.227371	0.128816	0.0462066	0.0693642	0.036833	0.10448
LOC105370747	0	0	0	0	0	0
LOC105370746	0	0	0	0	0	0
DNM1P30	0	0.0035627	0	0	0	0
RN7SL469P	0	0	0	0.0201369	0	0
LOC101929922	0	0	0	0	0	0
GOLGA8T	26.9357	24.4514	16.4922	17.2193	13.0567	15.0769
ULK4P3	0.729073	1.14737	1.22764	1.30671	0.472425	0.82232
DNM1P28	0	0.129497	0.15926	0.0522982	0.177733	0.171871
RN7SL673P	0	0.00176666	0	0	0	0
GOLGA8J	1.50061	1.43938	1.15917	1.3367	0.684418	0.863067
SYNGR2P1	0	0.025155	0.0132585	0.00435387	0.0110973	0.00953896
NCAPGP2	0	0	0	0	0	0
HMGN2P5	12.6216	11.5527	16.1634	8.85983	14.164	12.4748
TJP1	0.740694	0.580237	0.568648	0.351499	0.447958	0.866369
LOC105370743	0	0	0	0	0	0
LOC100130111	0	0	0	0	0	0
TUBBP8	0	0	0	0	0	0
NSMCE3	8.26741	8.45176	8.33335	9.5337	6.99997	6.4038
LOC100420707	0	0.0323101	0.0894065	0.0782921	0.099777	0.128649
FAM189A1	0	0	0.030251	0.119207	0	0
APBA2	45.2558	42.4726	46.7328	42.8821	42.1006	41.4081
PDCD6IPP2	3.36421	2.42199	3.3895	2.12492	2.92297	2.82657
LOC100289656	0	0	0	0.0393797	0	0
LOC100996670	0	0	0	0	0	0
WHAMMP2	0.0101982	0.0179753	0.00828999	0.0108892	0.0185031	0.00596431
RN7SL719P	0.00344659	0	0	0	0	0.00403139
LOC107984746	0	0	0	0	0	0.0170118
GOLGA8M	3.10952	2.81348	1.78623	2.21346	1.35402	1.30937
LOC100419574	1.30892	1.12237	0.718921	0.831005	0.545571	0.620681
HERC2P9	4.10303	4.47323	2.22602	4.45975	2.22911	2.52902
HERC2P11	0.0377065	0.0443073	0.0306511	0.0939425	0.0342064	0
LOC105369220	0	0	0	0	0	0
LOC100132202	0	0.0183386	0	0	0.0188771	0
MPHOSPH10P8	0	0	0	0	0	0
GOLGA8G	0	0.0508809	0.0234657	0	0.0261876	0
ABCB10P4	0.0746537	0.0822395	0.0303424	0.0398556	0.220102	0.0873204
MIR4509-3	0	0	0	0	0	0
LOC101059997	0	0	0	0	0	0
MIR4509-2	0	0	0	0	0	0
ABCB10P3	0.0359525	0.0158423	0.0243544	0.0255921	0.0507347	0.0443889
GOLGA8F	0.00976501	0.00860582	0.0158756	0.0104266	0.00885855	0.0285547
MPHOSPH10P7	0	0	0	0	0	0
GOLGA6L22	0	0	0	0	0	0
LOC101060587	0	0	0	0	0	0
HERC2P1	0	0.00239584	0.00220987	0.0116109	0.00493241	0.00635965
RPL41P2	0.0404844	0.0380572	0.0153576	0.0489908	0.0514169	0.0252552
HERC2	34.3563	35.9502	28.9839	28.4425	26.8606	33.5387
RPL5P32	0	0.0381217	0	0	0	0.0252981
OCA2	0	0	0	0	0	0
LOC100421667	0	0	0	0	0	0
MIR4509-1	0	0	0	0	0	0
ABCB10P1	0.0471572	0.124678	0.0191667	0.12588	0.235288	0.275792
RN7SL106P	0	0	0	0	0	0
GOLGA8DP	0.0389753	0.0171743	0.0475236	0.0832316	0.0176787	0.0227942
MPHOSPH10P5	0	0	0	0	0	0
GOLGA6L1	0	0	0	0	0	0
LOC101060118	0	0	0	0	0	0
ELMO2P1	0	0	0	0	0	0
TUBGCP5	26.4633	28.2055	28.4063	15.2148	26.0586	31.3502
PRB1	0	0	0	0	0	0
PRB4	0.00140748	0	0	0	0	0
PRB3	0	0	0	0	0.004724	0.00609094
LOC100420583	0	0	0	0	0	0
LOC107987435	0	0	0	0	0	0
TAS2R42	0	0	0	0.00776526	0	0.00425326
TAS2R67P	0.00386099	0.00680532	0.0156927	0.00412257	0.00350259	0.0090322
SMIM10L1	2.898	2.8988	2.2334	2.63523	2.0322	1.94632
TAS2R30	0.0129306	0	0.0078833	0.00345165	0	0
TAS2R45	0	0	0	0	0	0
TAS2R68P	0	0	0	0	0	0
TAS2R46	0.0817322	0	0	0	0.0247151	0
TAS2R63P	0.31833	0	0	0	0	0
TAS2R31	0.438905	1.00569	0.713558	0.46864	0	0
TAS2R19	0.488106	0.645245	0	0.521174	0.553495	0.285462
TAS2R20	0.223715	0.215082	0.143279	0.44155	0.270598	0.174449
TAS2R50	0	0	0	0.0321892	0	0
TAS2R15P	0	0.0138509	0.0383272	0	0.00712882	0.0459581
TAS2R14	0.139705	0.215462	0.170346	0.335632	0.0950526	0.0408524
PRH1-TAS2R14	0	0.0316297	0	0	0.0651171	0
PRH2	0.163374	0.14398	0.0166005	0.239858	0.314943	0.167208
TAS2R13	0.00983888	0	0	0	0	0
TAS2R12P	0.0108363	0.00636662	0.00880865	0.0115704	0.0032768	0.00422497
PRH1	0.00220039	0.00193918	0	0.00704838	0	0
PRR4	0.00565843	0	0.00306643	0	0.00171106	0
PRH1-PRR4	0.00833612	0.0183664	0.0067763	0	0.00756231	0
LOC100420580	0	0	0	0	0	0
TAS2R10	0.000236106	0	0.000191927	0.000252101	0.000214189	0
LOC107984459	0.0319444	0.0134641	0.0406441	0.0430064	0.0138596	0.00812271
TAS2R9	0	0	0	0	0	0
TAS2R8	0	0	0	0	0	0
TAS2R7	0	0	0	0	0	0
IFITM10	0.651081	0.757839	0.369479	0.800124	0.936113	0.25864
KRTAP5-6	0	0	0	0	0	0
LINC02708	0	0	0	0	0	0
FAM99B	0	0	0	0	0	0
FAM99A	0	0	0	0	0	0
KRTAP5-5	0	0	0	0	0	0
KRTAP5-4	0	0	0.00491778	0	0	0
KRTAP5-3	0	0	0	0	0	0
KRTAP5-2	0	0	0	0	0	0
KRTAP5-1	0	0	0	0	0	0
KRTAP5-AS1	0	0.010786	0	0	0	0
DUSP8	0.00972275	0.00856857	0.00790347	0.0103814	0.00882021	0
LOC105379626	0	0	0	0	0	0
LOC105379586	0	0	0	0	0	0
LOC105377775	0	0	0	0	0	0
LOC105379627	0	0	0	0	0	0
FAM20C	0	0.013099	0.0241644	0	0	0.0347706
LOC105375116	0	0	0	0	0	0
LOC105375115	0	0	0	0	0	0
LOC100507642	0	0	0	0	0	0
LOC102723672	0.173406	0	0.0704795	0.0925769	0.0393273	0.152121
LOC105375114	0	0	0	0	0	0
LOC101929756	0	0	0	0	0	0
LOC105375113	0	0	0	0	0	0
LOC107986751	0	0	0	0	0	0
LOC105375112	0	0	0	0	0	0
LOC102723872	0.0716358	0.042088	0.0582316	0.0339951	0.043324	0.0837904
RNU1-79P	0	0	0	0	0	0
LOC107987429	0	0	0	0	0	0
LOC112267926	0	0	0	0	0	0
LOC107987427	0	0	0	0	0	0
LOC105375006	0	0	0	0	0	0
TRA-CGC2-1	0	0	0	0	0	0
TRA-AGC4-1	0	0	0	0	0	0
LINC00533	0	0	0	0	0	0
TRT-CGT3-1	0	0	0	0	0	0
TRA-TGC2-1	0	0	0	0	0	0
LOC105374996	0	0	0	0	0	0
TRA-TGC9-1	0	0	0	0	0	0
TRA-AGC3-1	0	0	0	0	0	0
TRS-GCT4-1	0	0	0	0	0	0
TRQ-TTG2-1	0	0	0	0	0	0
ZBED9	0	0	0	0	0	0
TRR-TCG5-1	0	0	0	0	0	0
LOC107986586	0	0	0	0	0	0
TRI-TAT3-1	0	0	0	0	0	0
GPX5	0	0	0	0	0	0
GPX6	0	0	0	0	0	0
PROP1	0	0	0	0	0	0
SUDS3P1	0.609944	0.994446	0.805697	0.602421	0.774655	0.927466
LOC100128340	0.00620162	0.00819815	0.0025206	0.00331088	0.00281297	0.00725387
LOC728554	0.538265	0.468512	0.77246	0.652781	0.699293	0.963823
MCCC2	3.85209	4.20311	4.88531	3.5461	3.95432	4.60168
HMGN1P12	0	0.00510958	0.00471296	0	0.00788945	0
LOC100419852	0	0	0	0	0	0
BDP1	0.242829	0.26448	0.30603	0.1771	0.291732	0.334276
LOC107987434	0	0	0	0	0	0
PMCHL2	0	0	0	0	0	0
LINC02197	0	0	0	0	0	0
LOC107986421	0	0.0304202	0.0140294	0.00921405	0.00782838	0
LOC441081	0.0642105	0.075451	0.0347972	0.0228535	0.0776667	0
GUSBP17	0.0139962	0.0370043	0.0227546	0.0199259	0.025394	0.010914
LOC107987433	0	0	0	0	0	0
GUSBP9	1.0965	0.621215	0.859492	0.376323	0.39078	0.229026
CDH12P4	0.00397203	0.00175026	0.000538134	0	0.000600554	0.00077433
NAIPP4	0.0772908	0.0459041	0.0409751	0.053822	0.0381066	0.0334105
GTF2H2	3.58053	4.56716	5.74452	3.97401	6.53906	6.88824
NAIPP1	0.0570678	0.0628667	0.0231948	0.030467	0	0.0166877
NAIP	1.30583	1.91213	1.27379	1.20124	0.56497	0.610959
SMN1	6.32306	5.53827	8.95543	5.0118	8.19947	5.67171
SERF1A	0.288621	0.391321	0.27071	0.33188	0.30211	0.129843
CDH12P3	0.00205338	0.00361925	0.00166916	0.00438498	0.00372554	0.00480356
NAIPP2	0.425674	0.318871	0.311421	0.32384	0.164118	0.192936
SMN2	18.2047	18.0122	22.8103	15.2046	24.1896	20.7383
SERF1B	0.570216	0.575057	0.525641	0.401714	0.511952	0.28879
CDH12P2	0	0	0	0	0	0
LOC105369228	0.0184889	0.0162941	0.0125244	0.00164512	0.00838629	0.0126151
LOC105379023	0	0	0	0	0	0
LOC112268330	0	0	0	0	0	0
GUSBP1	0.1527	0.132058	0.127608	0.153903	0.151472	0.125194
LOC728452	0	0	0.0039182	0.00514667	0	0
LOC728506	0.00975634	0.0257945	0.0118962	0.015626	0.00885068	0.0342352
GUSBP15	0.20765	0.244	0.126597	0.203241	0.235468	0.242883
GUSBP3	0.0366238	0.0349659	0.0322518	0.0162937	0.0193807	0.0499775
LOC105379623	0.000982168	0.000865576	0.00399194	0.00314612	0.000890996	0.00689289
RARRES2P4	0.974655	0.656848	0.279629	0.673384	0.208042	0.0670604
FRG2	0	0	0	0	0	0
DUX4L9	0	0	0.00182689	0	0	0
RNA5SP175	0	0	0	0	0	0
RNA5SP174	0.000892071	0.000786174	0.00072515	0.000952506	0	0.00104343
TUBB7P	0	0	0	0	0	0
MLLT10P2	0	0	0	0	0	0
FRG1	1.40243	1.24181	1.14542	1.22066	1.35214	1.08063
LINC01881	0.0467955	0.121659	0.0589609	0.0624572	0.0849032	0.0574722
LINC01880	0	0	0	0	0	0
LOC105373980	0	0.00924322	0	0	0	0
LOC285097	0.0245264	0.0216149	0.13956	0.052376	0.0222497	0
LINC01238	0.304895	0.366411	0.292907	0.162775	0.289165	0.162103
LINC01237	0.0553578	0.0243932	0.0449995	0	0.0627739	0.0323753
LOC101926946	0	0	0	0	0	0
LOC105374866	0	0	0	0	0	0
LOC112268329	0	0	0	0	0	0
OR2G6	0	0	0	0	0	0
OR2AS2P	0	0	0	0	0	0
OR2T5	0	0	0	0	0	0
LOC105373277	0	0	0	0	0	0
OR2T3	0	0	0	0	0	0
LOC105373279	0	0	0	0	0	0
OR2T2	0	0	0	0	0	0
OR2T7	0	0	0	0	0	0
OR2T1	0	0	0	0	0	0
OR2T6	0.00444591	0	0	0	0	0
OR2T4	0	0	0	0	0	0
TBX22	0	0	0	0	0	0
LINC00685	3.46378	3.5432	3.77096	4.22679	4.26448	2.60453
APOBEC3A_B	0	0	0	0	0	0
LOC105373032	0	0	0	0	0	0.0326404
NCF4	19.7818	19.907	12.3751	28.3144	15.1141	13.4995
NCF4-AS1	0	0.139596	0	0.169131	0.574784	0.185276
PVALB	0	0	0	0	0	0
NDUFA9P1	0	0.165605	0.0763751	0	0.0852341	0
RPL41P3	0	0	0	0	0	0
RBFOX2	0.967608	0.97285	1.70974	0.941002	0.515134	1.9607
APOL5	0	0	0	0	0	0
MRPS16P3	0	0	0	0	0	0
CABIN1	1.68516	1.72796	1.98873	1.81973	2.44481	2.63805
GSTTP2	0	0	0	0	0	0
GSTT1	0	0	0	0	0	0
GSTT1-AS1	0	0	0	0	0	0
LOC391322	0	0	0	0	0	0
LOC100420769	0	0	0	0	0	0
EIF4EBP1P2	0	0	0	0	0	0
MTND1P13	0	0	0	0	0	0
GSTT4	0	0	0	0	0	0
GSTT2	0.0361943	0.0683523	0.0462342	0.0220836	0.0140719	0.0241917
DDT	4.52657	4.7186	5.35461	5.60872	6.60392	5.70949
DDTL	1.91053	1.85901	2.10665	2.29094	2.14324	2.1642
GSTT2B	0.164101	0.156191	0.197425	0.05607	0.0416831	0.130522
LOC100652871	0	0	0	0	0	0
LOC100129358	0.203377	0.124685	0.093443	0.141623	0.0561517	0.0310285
LOC107985558	1.30353	1.09884	0.691055	1.57338	0.925455	0.795497
MIF	0	0	0	0	0	0
MIF-AS1	0.00395257	0.00400587	0.00305233	0.00527543	0.00322709	0.00346741
RN7SL268P	0.000183827	0.000432013	9.96198e-05	0	5.55875e-05	0.000143345
SLC2A11	1.59541	1.68396	0.708763	1.80254	0.790975	0.694367
DERL3	0	0	0	0.00201554	0.000856215	0.00110397
SMARCB1	41.5955	41.133	44.5042	43.9987	41.9131	45.0829
MMP11	0.00162999	0.0022984	0.00185499	0.00104425	0.00147868	0.00266918
LOC107985577	0.015937	0	0	0.0170167	0	0
CHCHD10	0.730586	0.716749	0.9278	1.05973	1.40807	1.60913
C22orf15	0.00252766	0.0066828	0.00205469	0	0	0.0118261
LINC02557	0	0	0	0	0	0
LOC648771	0	0	0	0	0	0
FAM230I	0	0	0	0	0	0
LINC01659	0	0.00299959	0	0	0	0
LOC107985555	0	0	0	0	0	0
ZDHHC8P1	0.00779507	0	0.012673	0	0	0.00911768
CES5AP1	0	0	0	0	0	0
LL22NC03-63E9.3	0	0	0	0	0	0
PRAME	0	0	0	0	0	0
LOC105379601	0	0	0	0	0	0
ZNF280A	0	0	0	0	0	0
LOC105379602	0	0	0	0	0	0
ZNF280B	0	0	0	0	0	0
LOC100736412	0	0	0	0	0	0
LOC105379603	0	0	0	0	0	0
LOC105379604	0	0	0	0	0	0
LOC102725003	0	0	0	0	0	0
LOC105379605	0	0	0	0	0	0
IGLV5-39	0	0	0	0	0	0
IGLV7-43	0	0	0	0	0	0
LOC102724999	0	0	0	0	0	0
IGLV5-45	0	0	0	0	0	0
SNORD159	0.074292	0.0436486	0.154332	0.0528834	0.232141	0.16414
LSS	0.253477	0.259612	0.694714	0.332368	0.701106	0.888454
SPATC1L	1.36745	1.48518	1.89438	2.26211	3.97488	3.07503
FTCD-AS1	0	0	0	0	0	0.00144613
FTCD	0.0186587	0.0493313	0.00505579	0.0531275	0.0620645	0
GART	38.1876	37.5209	37.9289	35.6594	41.4821	46.1711
DNAJC28	0.127945	0.0451026	0.034668	0.07286	0.0851164	0.0199538
RPS5P3	0.0380745	0	0	0	0.0172701	0
TMEM50B	7.30493	6.94751	8.42821	8.53176	9.87223	9.24597
IFNGR2	3.41952	3.36618	2.87785	4.1509	2.80079	2.86955
C21orf62	0.0126882	0	0.0206281	0	0	0.0296822
C21orf62-AS1	0.0870083	0.460078	0.0707277	0	0	0.101771
PAXBP1	33.0374	32.0987	33.6062	25.5893	32.632	29.5101
RNU4-45P	0	0	0	0	0	0
LOC100420035	0	0	0	0	0	0
LOC105379618	0	0	0	0	0	0
LINC00308	0	0	0	0	0	0
LOC100134423	0	0	0	0	0	0
BTG3-AS1	0.109043	0.0320329	0.0787905	0	0.0219824	0.0425149
BTG3	0.255325	0.405028	0.431703	0.567055	0.352068	0.573402
LOC107987418	0	0	0	0	0	0
NEK4P1	0	0	0	0	0	0
LOC107985511	0	0	0	0	0	0
PCMTD2	2.79987	2.75066	1.34586	2.41195	1.38895	1.29233
MYT1	0	0.00467218	0.00861903	0.0396247	0.0432845	0
LOC105372727	0	0	0	0	0	0
NPBWR2	0	0	0	0	0	0
OPRL1	4.1764	8.14996	2.18245	2.76054	0.902075	0.93048
KCNQ2-AS1	0	0	0	0	0	0
LOC105372721	0	0	0	0	0	0
KCNQ2	0.0223421	0.0065633	0	0	0.00675605	0.0261329
LOC105372704	0.179339	0.0677357	0.0937169	0.2462	0.185933	0.104884
TAF4	10.5	10.9728	14.2721	9.55721	13.1515	14.9213
MIR1257	0	0	0	0	0	0
CDH4	0.00514989	0.00618894	0.00532798	0.00199956	0.00722012	0.00273804
LOC107985440	0	0	0	0	0	0
LOC107987425	0	0	0	0	0	0
PCAT19	0	0	0	0	0	0
TPM3P5	36.7649	39.6596	42.1038	20.4463	29.9706	26.8988
PLEKHA3P1	0.156112	0.147408	0.0997081	0.0476253	0.232663	0.143472
LINC01480	0.000995008	0.00116919	0.00134804	0.000354139	0	0
LOC110467527	0	0.00121789	0	0	0	0
CEACAM21	0.00494946	0.00134213	0.000618975	0.000813042	0	0
CEACAMP3	0	0	0	0	0	0
DNAJC19P2	0	0	0	0	0	0
LOC105372404	0	0	0	0	0	0
CEACAM4	0	0	0	0	0	0
DNAJC19P3	0	0	0	0	0	0
LOC105372405	0	0	0	0	0	0
CEACAM7	0	0	0	0	0	0
GPI	4.95992	5.13845	10.3261	4.99254	7.53002	10.1244
GARRE1	3.32942	3.97263	2.6062	3.84758	4.37518	4.40717
RPL29P33	0	0.0117231	0.00540654	0	0.00301683	0
LSM14A	40.5078	42.059	39.0278	34.3582	37.4722	32.6301
ZNF92P2	0	0	0	0	0	0
PCGF7P	0.467535	0.601165	0.52335	0.564679	0.38937	0.654442
MTDHP5	0	0	0	0	0	0
VN1R85P	0.000393787	0.000347042	0	0.000420466	0	0
ZNF676	0.397273	0.396795	0.301407	0.113116	0.360395	0.0309786
BNIP3P30	0.114202	0.0251612	0.116041	0	0	0
LOC105372328	0	0	0.0051199	0	0	0
LOC107985324	0	0	0	0	0	0
BNIP3P31	0	0	0	0	0	0
ZNF43	20.7212	24.0231	19.8615	13.2514	15.9329	11.3409
BRI3BPP1	0	0	0	0	0	0
CCNYL6	0.0811839	0.0298111	0.038496	0.00722366	0.0306866	0
ZNF100	0.880098	0.970475	0.950982	0.605089	0.695193	0.808477
VN1R84P	0	0.0526227	0	0	0.126392	0.0232807
MTDHP4	0.000675008	0	0	0	0	0
MTDHP3	0	0	0	0	0	0
LOC400682	0.0282997	0.0374104	0.00766813	0.0100723	0.0470667	0.0055169
ZNF430	18.9546	21.227	19.429	12.785	15.6853	13.8432
LOC112268247	0	0	0.00151483	0	0	0
KRT18P40	0	0	0	0	0	0
ZNF85	5.82852	5.43015	4.32139	3.59725	3.30031	3.74586
LOC100418993	0	0	0	0	0	0
LOC100418992	0	0	0	0	0	0
LOC100418991	0	0	0	0	0	0
LOC100418990	0	0	0	0	0	0
LOC100418989	0	0	0	0	0	0
LOC100418988	0	0	0	0	0	0
LOC100418987	0	0	0	0	0	0
LOC100418986	0	0	0	0	0	0
BNIP3P24	0	0.0475481	0	0.0576079	0.0489445	0
ZNF66	0.223676	0.28209	0.316622	0.0700016	0.220405	0.216519
VN1R79P	0	0	0	0	0	0
LOC100533638	0	0	0	0	0	0
LOC105372319	0	0	0	0.0741656	0	0
SBNO2	2.50576	2.45315	2.00215	2.38458	1.84664	2.31849
MED16	4.98318	5.09979	5.37737	5.70654	6.05196	6.19299
CFD	1.09182	1.21691	1.07024	2.98303	1.57309	1.87804
ELANE	0	0	0.00856026	0.0787091	0	0.0862226
PRTN3	0	0.00438324	0	0.0026553	0	0.00872632
AZU1	0.0867791	0.114717	0.0705414	0.648607	0.196809	0.456764
CTDP1	3.74267	3.62629	4.54574	4.34677	6.49266	5.63212
CTDP1-DT	0.0376395	0.0663428	0.152983	0	0	0.044026
LOC284240	0.00584261	0.00171635	0	0.00415896	0	0.00455596
DSEL	0.011621	0.00585227	0.00742226	0.00354522	0.00677715	0.00485455
LOC100422053	0	0	0	0	0	0
RPLP0P11	0	0	0	0	0	0
LOC105372115	0.011432	0	0	0	0.00518542	0.0200576
SKA1	0.658219	0.687812	0.532507	0.487505	0.473903	0.490048
LOC105372114	0	0	0	0	0	0
RNA5SP458	0	0	0	0	0	0
TBCD	1.39793	1.43828	1.45633	1.29437	1.36782	1.78503
B3GNTL1	0.0799879	0.0639352	0.0514118	0.0781241	0.0354377	0.0362634
METRNL	0.131949	0.114794	0.103134	0.139082	0.126606	0.0692537
SEPTIN9	0.811736	0.856601	1.18829	0.804713	1.09759	1.08534
LOC107984143	0	0	0	0	0	0
SEPTIN9-DT	0	0	0	0	0	0
LACAT1	0	0	0	0	0	0
MYL6P5	0	0.00113534	0	0.00137555	0	0
RDM1P4	0.00147401	0	0.0011982	0.00157387	0.00133718	0
LOC107984156	0	0	0	0	0	0
LOC100294336	0	0	0	0	0	0
LOC101929775	0	0	0	0	0	0
LOC107984142	0	0	0	0	0	0
LOC112268319	0	0	0	0	0	0
LOC100996747	0	0	0	0	0	0
LOC100996745	0	0	0	0	0	0
LOC105371801	0	0	0	0	0	0
LOC105371799	0	0	0	0	0	0
RN7SL656P	0	0	0	0	0.0604628	0
LRRC37A	2.28434	1.74216	2.10687	1.82932	1.79333	1.49011
LOC107987254	1.60548	1.78399	0.453936	0.447194	0.506589	0.489882
LOC100996709	0	0	0	0	0	0
NSFP1	1.91241	1.64104	2.29094	1.39714	1.78054	1.58937
LOC101929774	0	0	0	0	0	0
KRTAP16-1	0	0	0	0	0	0
KRTAP17-1	0	0	0	0	0	0
TBC1D3P7	0	0	0	0	0	0
KRT33A	0	0	0	0	0	0
LOC105371778	0	0	0	0	0	0
KRT33B	0	0	0	0	0	0
KRT34	0	0	0	0	0	0
LOC100653049	0	0	0	0	0	0
KRT31	0	0	0	0	0	0
KRT41P	0	0	0	0	0	0
LOC100505782	0	0	0	0	0	0
KRT37	0	0	0	0	0	0
KRTAP9-3	0	0	0	0	0	0
KRTAP9-8	0	0	0	0	0	0
KRTAP4-12	0	0	0	0	0	0
KRTAP4-11	0	0	0	0	0	0
KRTAP4-9	0	0	0	0	0	0
KRTAP4-16	0	0	0	0	0	0
KRTAP4-8	0	0	0	0	0	0
LOC100996750	0	0	0	0	0	0
KRTAP2-5P	0	0	0	0	0	0
KRTAP2-4	0	0	0	0	0	0
KRTAP2-3	0	0	0	0	0	0
KRTAP2-2	0	0	0	0	0	0
KRTAP2-1	0	0	0	0	0	0
KRTAP1-1	0	0	0	0	0	0
KRTAP1-3	0	0	0	0	0	0
KRTAP1-4	0	0	0	0	0	0
KRTAP1-5	0	0	0	0	0	0
KRTAP3-1	0	0	0	0	0	0
KRTAP3-4P	0	0	0	0	0	0
KRTAP3-2	0	0	0	0	0	0
KRTAP3-3	0	0	0	0	0	0
KRT40	0	0	0	0	0	0
KRT39	0	0	0.0041808	0	0	0
LOC107985072	0	0	0	0	0	0
KRT23	0	0	0	0	0	0
KRT20	0	0	0	0	0	0
KRT12	0	0	0	0	0	0
LOC105371777	0	0	0	0	0.00678622	0
C17orf98	0	0	0	0	0	0
MIR4727	0	0	0	0	0	0
CWC25	0.379953	0.378819	0.460166	0.31349	0.410834	0.4736
PIP4K2B	6.71969	6.92839	8.11837	5.55387	6.09592	7.01826
RNU6-866P	0	0	0	0	0	0
PSMB3	17.2932	19.4679	26.2798	23.5437	28.231	29.8932
TRN-GTT2-5	0	0	0	0	0	0
LOC100287808	0.519307	0.610215	0.562849	0.18483	0.0785169	0.101237
PCGF2	0.731954	0.702878	0.687611	0.58247	0.341401	0.504804
RNA5SP440	0	0	0.00269042	0	0	0
CISD3	0.0711499	0.0759823	0.136767	0.100996	0.147315	0.156653
MIR4726	0	0	0	0	0	0
LOC105371762	0.111272	0.168108	0.180903	0.0678917	0.129784	0.0185931
MLLT6	13.5734	13.671	9.69724	10.9553	9.80486	9.76254
MIR4734	0	0	0	0	0	0
LOC105371763	0.0240394	0.0308156	0.0373061	0.0443357	0.0495635	0.0383431
LOC105371764	0.00627365	0.00829338	0.00509975	0.0234454	0.00284564	0.00733813
EPOP	0.204588	0.175794	0.370031	0.172028	0.394392	0.457663
LOC105371761	0	0	0	0	0	0
SRCIN1	0.00650444	0	0	0.00347255	0.00295032	0
LOC101929494	0.00329944	0	0	0	0.00149658	0
ARHGAP23	0.0826433	0.0858388	0.0887728	0.267878	0.524803	0.573089
SOCS7	0.416986	0.410067	0.277487	0.421684	0.334448	0.26414
GPR179	0.0135921	0.0119786	0.0220975	0.0290258	0	0
MRPL45	0.430899	0.396452	0.313292	0.581523	0.457387	0.475928
LOC105371760	0	0	0	0	0	0
NPEPPSP1	0.272661	0.257216	0.168572	0.17632	0.163739	0.193151
TBC1D3	0.0920443	0.0935976	0.103599	0.20412	0.0578078	0.0745351
LOC102723933	0	0	0	0.0023011	0	0
RNA5SP526	0	0	0	0	0	0
LOC112268325	0	0	0	0	0	0
TBC1D3E	0.0829818	0.0797795	0.0735869	0.0711514	0.0764195	0.0441189
LOC102723851	0	0	0	0	0	0
RNU6-489P	0	0	0	0	0	0
YWHAEP7	0	0.00700001	0.00645666	0.00848101	0	0.00929059
LOC105371757	0	0	0	0	0	0
LOC105371754	0	0	0	0	0	0
LOC107985009	0	0	0	0	0	0
HNF1B	0	0	0	0	0	0
LOC105371756	0.000308976	0.000544596	0	0	0	0
LOC105371755	0	0.00307164	0.00226657	0.00223291	0.00063237	0.00163071
MIR378J	0	0.00405871	0.011231	0.0245871	0	0.00538683
DDX52	2.1966	2.12517	2.32256	1.70888	2.3581	2.56302
SYNRG	11.6007	10.182	10.2925	7.88008	7.1656	9.90095
DUSP14	4.06051	5.1794	4.16934	3.99332	5.96159	5.56188
LOC100419621	0.00111243	0	0.00180855	0	0	0
TADA2A	3.70084	4.01315	4.25874	3.43119	2.79085	3.90124
C17orf78	0.00869318	0	0	0.0185642	0	0
SNORA90	0	0	0	0	0	0
RPL18AP12	0	0	0	0	0	0
HMGB1P24	0.00281712	0.0148962	0.00457998	0.00601594	0.00511123	0.00988532
RPS2P49	0	0	0	0	0	0
ACACA	7.04083	8.33281	12.8502	6.35127	11.6243	15.2246
LOC105371753	0	0.0121864	0	0	0	0
MIR2909	0	0	0	0	0	0
AATF	6.20506	5.76468	7.18769	6.69445	7.47023	8.08952
LHX1	0	0	0	0	0	0
LHX1-DT	0	0	0	0	0	0
LOC105371750	0.0323363	0.0142489	0	0.023018	0.0244455	0
LOC105379600	0	0	0	0	0	0
LOC105371751	0	0	0	0	0.0204251	0
LOC105376836	0	0	0	0	0	0
MRM1	6.67136	5.64733	12.5586	7.87315	11.1486	11.4996
LOC107985031	1.56395	1.28641	1.1018	1.33592	2.17545	1.21954
DHRS11	6.1146	6.04013	3.87805	9.97263	8.1681	6.877
RPS2P50	0.0345177	0.0608403	0.0420883	0.0184281	0.0547987	0.0302808
GGNBP2	2.61785	2.74815	2.18491	2.62331	2.67329	2.41524
PIGW	2.45046	2.75304	3.87744	2.05723	5.90535	3.89458
MYO19	13.3463	13.5756	16.7778	11.7946	16.6374	17.664
RNA5SP439	0.0185653	0.0163614	0.0452742	0	0	0
ZNHIT3	38.9167	36.5733	37.0938	39.1629	34.2106	33.6363
LOC105371749	0.0448057	0.0789738	0.145687	0.287047	0.162586	0
TBC1D3JP	0	0	0.0258765	0.0509844	0.014439	0.0372342
TBC1D3F	0.703999	1.17881	0.572269	0.977201	0.383189	0.16469
RNU6-1192P	0	0	0	0	0	0
TBC1D3H	0	0	0	0	0	0
LOC100420852	0.00398956	0.0123059	0.00972916	0.0191693	0.00361922	0.00233324
LOC102723414	0.00381333	0	0	0	0	0
LOC101060212	0.229393	0.255676	0.257767	0.187302	0.238702	0.181507
CCL23	0.248702	0.266146	0.259928	0.379359	0.547925	0.166229
CCL15	0	0	0	0	0	0
CCL15-CCL14	0	0	0	0	0	0
CCL14	0	0	0	0	0	0
CCL16	0	0	0	0	0	0
LYZL6	0	0	0	0	0	0
RDM1	1.20343	0.424228	0.326082	0.68531	0.291124	0.469205
LOC100133244	0	0	0	0	0	0
LRRC37A9P	0	0.202107	0	0.122434	0	0
LRRC37A8P	0.0908621	0.0655167	0.0402875	0.0176396	0.0299737	0
LOC105371745	0	0	0	0	0	0
CCL5	0.505152	0.445186	0.136877	0.134844	0.114565	0
LOC105371744	0	0	0	0	0	0
LOC107985049	0.0461219	0.0483891	0.0303505	0.0469015	0.0199241	0.038534
HEATR9	0	0	0.000553321	0	0	0
TAF15	6.55208	6.63921	7.2091	5.31592	4.84449	5.63282
MMP28	0	0	0	0.006285	0	0
SERPINF1	3.60609	3.51997	1.21433	6.79452	2.14497	2.17563
SERPINF2	0.111213	0.0793419	0.0473539	0.22053	0.0960847	0.105305
WDR81	1.06278	1.04397	1.04462	1.30386	1.85918	1.33215
MIR22	0	0	0	0	0	0
MIR22HG	0.0812663	0.152788	0.061656	0.121481	0.16219	0.076044
TLCD2	0.00465969	0	0.00757558	0	0	0
PRPF8	152.222	153.324	202.057	130.561	202.217	201.147
RILP	34.2275	28.4343	22.6886	41.7412	29.037	25.7581
SCARF1	44.8014	43.6522	26.9179	20.3826	11.4102	10.5457
RN7SL105P	0	0	0	0	0	0
SLC43A2	9.27804	12.1623	10.3086	10.2053	15.6916	12.1066
CRK	0.680429	0.672543	0.696735	0.547236	0.759363	0.63172
YWHAE	9.82786	9.67138	11.925	8.59315	10.2834	9.50064
ABR-AS1	0	0	0	0	0	0
MRPL14P1	0	0	0	0	0	0
LOC105371480	0	0	0	0	0	0
LOC105371425	0	0	0	0	0	0
LOC101929045	0	0	0	0	0	0
LINC02091	0	0	0	0	0	0
DOC2B	0	0	0	0	0	0
SCGB1C2	0	0	0	0	0	0
LOC101929828	0.0134845	0.0356513	0.0219227	0	0	0.0630899
GTF2IP17	0	0	0	0	0	0
LOC101929823	1.72019	1.18821	0.718055	0.69498	0.885697	0.543801
LINC02887	0.0156638	0.0263538	0.00694519	0.00912272	0.0180852	0.0133247
LOC102723777	0.0236463	0.187553	0.0192217	0.138865	0.128708	0.0553168
LOC101929817	0.201046	0.161073	0.126284	0.243939	0.248704	0.0962009
UTP4	0.646936	0.587729	0.70436	0.579189	0.811623	0.884423
RNU6-22P	0	0	0	0	0	0
SNTB2	3.09266	3.5432	4.86035	2.50966	2.84299	3.35213
CES5A	0.0331905	0.0292505	0	0	0	0
CES1	0	0.0171203	0	0	0	0
LOC107987423	0	0	0	0	0	0
LOC441750	0	0	0	0	0	0
LOC100133127	0	0	0	0	0	0
LOC105371105	0	0	0	0	0	0
LOC105371098	0.372987	0.410887	0.151597	0.0995639	0	0.436272
NPIPA7	2.15025	2.05844	1.41788	1.6323	1.10491	1.06701
MIR6511A3	0	0	0	0	0	0
PKD1P2	15.5276	16.8695	13.0792	9.06161	9.95752	8.3609
MIR6770-2	0	0	0	0	0	0
MIR6511A2	0	0	0	0	0	0
PKD1P1	5.16443	5.40221	3.86063	3.52562	3.29121	3.1608
MIR3180-2	0	0	0	0	0	0
MIR3670-2	0	0	0	0	0	0
MIR3179-2	0	0	0	0	0.131733	0
LOC105371099	0	0.0426582	0.196735	0	0	0.113234
NOMO3	1.22511	1.37869	1.31131	1.67255	1.25699	1.11216
LOC105371100	0	0	0	0	0	0
ABCC6	0.00180519	0.0031818	0.000550279	0.00144562	0.000614108	0.000527871
RPL17P40	0	0	0	0	0.00120743	0
ABCC1	54.7649	57.388	42.0526	38.8522	28.678	34.5465
RPL15P20	0.00432718	0	0.0035175	0	0.0039255	0
LOC107984869	0	0	0	0	0	0
RNU6-213P	0	0	0.00124445	0	0.00277759	0.00179066
CEP20	6.71315	6.54629	4.83877	7.40615	5.40003	5.42655
MYH11	0.199438	0.246068	0.145908	0.276834	0.21711	0.116639
NDE1	39.6309	40.5916	38.6872	36.6485	43.5491	39.3882
MIR484	0	0	0	0	0	0
MIR6506	0	0	0	0	0	0
MARF1	3.25831	3.42111	2.42366	2.73044	2.2194	2.6199
LOC105371102	0.0619307	0	0	0.0330632	0	0.0362193
BMERB1	0.100347	0.309521	0	0.160717	0.227579	0.293432
MPV17L	0.0944044	0.124797	0.23022	0.1512	0	0.276056
NPIPA5	30.1334	28.1133	17.1544	28.7163	14.9147	16.2454
LOC105371103	0.169481	0.0597449	0.0275537	0	0.0307497	0
ABCC6P1	0	0.0418789	0	0	0	0
ABCC6P2	0.0552187	0.0973275	0.0897728	0.0589596	0	0.129176
NOMO1	53.7786	55.4977	55.5497	73.0174	54.1734	51.6446
MIR3179-1	0	0.0112398	0	0	0	0
MIR3670-1	0	0	0	0	0	0
MIR3180-1	0	0	0	0	0.00160044	0
MIR1972-1	0	0	0	0	0	0
LOC728138	0.0351624	0.0356366	0.0628825	0.0600713	0.0813408	0.0411285
NPIPA1	0.122261	0.0718319	0.0441708	0.0290098	0.0492943	0.0476686
MIR3179-3	0	0	0	0	0.0025824	0
MIR3670-3	0	0	0	0	0	0
MIR3180-3	0	0	0	0	0	0
LOC102724992	0	0	0	0	0	0
MIR6511A1	0	0	0	0	0	0
LOC100288162	0.135177	0.0953043	0.109883	0.0769786	0.179856	0.210817
MIR6770-1	0	0	0	0	0	0
NPIPA2	1.46881	1.3376	0.819864	1.25466	0.799481	0.859016
PKD1	24.4182	25.4223	16.7243	20.4574	16.5439	18.2255
LOC102724984	0	0	0	0	0	0
MIR1972-2	0	0	0	0	0	0
NTAN1	0.614799	0.642154	0.72928	0.695351	0.578385	0.612578
RRN3	5.30037	5.19689	5.9548	3.94336	5.30125	5.41307
LOC100505915	0.0224175	0.0133646	0.015007	0.00704007	0.00657947	0.00462726
NPIPP1	0.477803	0.543899	0.326902	0.340115	0.310639	0.25615
NPIPA8	0.00850322	0.00499588	0.00230404	0.0151322	0	0.00331533
MIR6511B2	0	0	0	0	0	0
PKD1P6-NPIPP1	0.165807	0.111568	0.0846943	0.130388	0.0609795	0.0563476
PDXDC1	3.08458	3.32373	3.54082	3.79492	4.69924	4.201
MIR4516	0.0128812	0.00378402	0.0034903	0.00458461	0	0
MIR3180-4	0.0523525	0	0	0	0	0
LOC105371096	0	0	0	0	0	0
LOC105371097	0	0	0.00910134	0	0	0
LOC107984870	0	0	0	0	0	0
LOC100652777	0.0515874	0.227318	0.0419346	0.0275412	0.0233993	0
NPIPA3	0.227208	0.273339	0.168081	0.237466	0.165766	0.157487
LOC105371095	0	0	0	0	0	0
PLA2G10	0.00105826	0.000466318	0.000860242	0	0.000960024	0.000618909
RNU7-125P	0	0	0	0	0	0
BFAR	0.504823	0.516273	0.629606	0.469336	0.572095	0.590477
RN7SL274P	0	0	0	0	0	0
LOC107984865	0.00375452	0.00330882	0.00101733	0.00267258	0	0.00146385
LOC105371094	0	0	0.00364392	0	0	0
LOC107987416	0	0	0	0	0	0
PARN	47.1973	48.9427	43.3773	40.5209	48.042	42.0838
CDIP1	166.604	164.338	139.157	135.186	109.656	107.865
HMOX2	0.0287773	0.0281791	0.0523548	0.041213	0.055009	0.0625114
NMRAL1	8.73546	8.54714	12.5105	10.6492	10.8729	12.2089
DNAJA3	21.6021	21.777	23.7222	23.8585	20.8971	27.4084
VASN	1.92509	2.06769	1.02695	4.59278	3.68379	1.72398
CORO7	0.996046	1.00639	0.770897	1.5129	0.750867	0.666211
PAM16	0.385096	0.339382	0.730424	0.411186	0.931598	0.900874
CORO7-PAM16	0	0.00264343	0	0	0.000907021	0
GLIS2-AS1	0	0	0	0	0	0
GLIS2	0.0678649	0.0744287	0.143432	0.0660214	0.139548	0.112896
HS3ST6	0	0	0	0	0	0
LINC02124	0	0	0	0	0	0
LINC00254	0	0	0	0	0	0
CAPN15	1.2359	1.33083	2.20889	1.44417	2.53193	2.83017
LINC00235	0.00806649	0.00236964	0.0174857	0	0.0121962	0.0157253
LOC107987417	0	0	0	0	0	0
RAB11FIP3	1.137	1.20384	1.26293	0.920288	0.989624	1.03232
DECR2	1.55838	1.24196	1.7638	1.85503	2.21189	2.26759
CPEB1	0.0833683	0.0146944	0.0135537	0	0.0151259	0
RPS17	5.04793	4.91676	5.15531	7.08036	4.95139	5.57058
DNM1P38	0	0	0	0	0	0
LOC105370926	0	0	0	0	0	0.0382315
GOLGA2P10	1.01234	1.26526	0.852841	1.13989	0.667905	0.8827
CSPG4P10	0.134707	0.163235	0.0273753	0.0179792	0.290232	0.236345
UBE2Q2P6	0	0	0	0	0	0.0200995
LOC102724034	0	0	0	0	0	0
GOLGA6L3	0.028795	0.0298551	0.00963818	0.01266	0.0199757	0.0118873
GOLGA6L9	1.14038	1.11018	0.603624	1.92556	0.805962	0.837545
RPL9P8	16.5456	15.4262	13.697	22.7114	13.8927	14.0053
UBE2Q2P2	0.0104765	0.0184657	0.00425808	0.0223725	0.014256	0.0220573
GOLGA6L4	1.96757	1.734	0.909466	2.18325	1.39994	1.12814
DNM1P41	0	0	0	0.00233501	0.00198385	0
LOC103171574	0	0	0	0	0	0
UBE2Q2L	0	0.000822628	0.0030351	0.000996673	0.000846787	0
LOC440300	0.0267718	0.0104861	0.0193443	0.038114	0.0188896	0.0313142
LOC105379597	0	0	0	0	0	0
LOC101929479	0.922793	0.632528	0.500083	0.437916	0.0930148	0.599648
GOLGA2P7	0.0177841	0.0192898	0.0211286	0.0146069	0.00620511	0.0304024
GOLGA6L10	0.0291065	0.0325334	0.0173124	0.0530607	0.0199645	0.0298933
DNM1P43	0	0	0	0	0	0
ADAMTS7P1	0	0.000368484	0	0	0	0
MIR4311	0	0	0	0	0	0
LOC105370867	0.00204218	0	0	0	0	0
MEGF11	0.0378143	0.0510989	0.0184432	0.0349926	0.0114347	0.00884606
RNU1-119P	0	0	0	0	0	0
LOC105370798	0	0	0	0	0	0
SORD2P	0.133946	0.120418	0.131863	0.114273	0.172804	0.162972
TRIM69	0.0464371	0.0409247	0.0235925	0	0	0
LOC100419583	0.172453	0.276012	0.20786	0.179903	0.102498	0.136794
MIR10393	0	0	0	0	0	0
B2M	81.3749	78.278	68.4689	98.7789	60.6271	60.3796
PATL2	0.39381	0.237232	0.125618	0.250165	0.104011	0.0816305
LOC107987422	0	0	0	0	0	0
CYFIP1	28.1534	27.1249	31.5449	27.0547	15.8072	36.0231
GOLGA8IP	0.00496258	0.00437348	0.00672334	0.00529879	0.00225096	0.0058046
RN7SL495P	0	0	0	0	0	0
LOC101927846	0.101065	0	0.082154	0.107912	0	0
LOC100419579	0.409857	0.468227	0.263243	0.307958	0.201972	0.23674
HERC2P2	36.178	35.5508	19.4894	37.7566	17.0364	19.2779
HERC2P7	0.0145927	0.0385814	0.0316325	0.0623254	0.00441271	0.0113791
LOC112268161	0	0	0	0	0	0
MPHOSPH10P9	0	0	0	0	0	0
GOLGA8EP	0	0.00115186	0.00106245	0.00139556	0	0.00305755
SPATA31E3P	0	0	0	0	0	0
LOC441711	0.0389612	0.0357669	0.0567438	0.0260005	0.061853	0.0360778
LOC102724737	0.00153695	0.0013545	0	0.00492323	0.00278856	0.00179773
LOC107987218	0	0	0	0	0	0
FAM30C	0	0	0	0	0	0
OR4M2B	0	0	0	0	0	0
OR4H6P	0	0	0	0	0	0
LOC107987217	0	0	0	0	0	0
LINC02203	0	0	0	0	0	0
OR11J6P	0	0	0	0	0	0
OR11J2P	0	0	0	0	0	0
MIR5701-2	0	0	0	0	0	0
NF1P9	0	0	0	0	0	0
LOC105369227	0	0	0	0	0	0
LOC107984135	0	0	0	0	0	0
VN1R60P	0	0	0	0	0	0
RNU6-631P	0	0	0	0	0	0
MIR3118-3	0	0	0	0	0	0
POTEB3	0	0	0	0	0	0
GRAMD4P6	0	0	0	0	0	0
CXADRP2	0	0	0	0	0	0
LONRF2P4	0	0	0	0	0	0
RNU6-1235P	0	0	0	0	0	0
LOC105379593	0	0	0	0	0	0
LOC646214	0.989651	0.872171	1.20671	0.627414	1.12223	1.41079
LOC105370714	0	0	0	0	0	0
LOC105370715	0	0	0	0	0	0
NBEAP4	0	0	0	0	0	0
IGHV5-78	0	0	0	0	0	0
MIR5195	0	0	0	0	0	0
IGHVIII-76-1	0	0	0	0	0	0
IGHV3-76	0	0	0	0	0	0
IGHV3-75	0	0	0	0	0	0
IGHVII-74-1	0	0	0	0	0	0
IGHV3-74	0	0	0	0	0	0
IGHV3-73	0	0	0	0	0	0
IGHV3-72	0	0	0	0	0	0
IGHV3-71	0	0	0	0	0	0
IGHV2-70	0	0	0	0	0	0
IGHV1-69D	0	0	0	0	0	0
IGHV1-69-2	0	0	0	0	0	0
IGHV3-69-1	0	0	0	0	0	0
IGHV2-70D	0	0	0	0	0	0
IGHV1-69	0	0	0	0	0	0
IGHV1-68	0	0	0	0	0	0
IGHVIII-67-4	0	0	0	0	0	0
IGHVIII-67-3	0	0	0	0	0	0
IGHVIII-67-2	0	0	0	0	0	0
IGHVII-67-1	0	0	0	0	0	0
SLC20A1P1	0	0	0	0	0	0
IGHV1-67	0	0	0	0	0	0
IGHV3-66	0	0	0	0	0	0
IGHVII-65-1	0	0	0	0	0	0
IGHV3-65	0	0	0	0	0	0
LOC102724977	0	0	0	0	0	0
IGHV3-64	0	0	0	0	0	0
GOLGA4P3	0	0	0	0	0	0
IGHV3-63	0	0	0	0	0	0
IGHVII-62-1	0	0	0	0	0	0
IGHV3-62	0	0	0	0	0	0
IGHV4-61	0	0	0	0	0	0
IGHVII-60-1	0	0	0	0	0	0
RNA5SP389	0	0	0	0	0.00293449	0
IGHV3-60	0	0	0	0	0	0
IGHV4-59	0	0	0	0	0	0
IGHV1-58	0	0	0	0	0	0
IGHV3-57	0	0	0	0	0	0
IGHV7-56	0	0	0	0	0	0
IGHV4-55	0	0	0	0	0	0
IGHV3-54	0	0	0	0	0	0
IGHVII-53-1	0	0	0	0	0	0
IGHV3-53	0	0	0	0	0	0
IGHV3-52	0	0	0	0	0	0
IGHVII-51-2	0	0	0	0	0	0
IGHV8-51-1	0	0	0	0	0	0
IGHV5-51	0	0	0	0	0	0
IGHV3-50	0	0	0	0	0	0
IGHVII-49-1	0	0	0	0	0	0
IGHV3-49	0	0	0	0	0	0
IGHV3-48	0	0	0	0	0	0
IGHVIII-47-1	0	0	0	0	0	0
IGHV3-47	0	0	0	0	0	0
IGHVII-46-1	0	0	0	0	0	0
IGHV1-46	0	0	0	0	0	0
IGHV1-45	0	0	0	0	0	0
IGHVII-44-2	0	0	0	0	0	0
IGHVIV-44-1	0	0	0	0	0	0
LINC00221	0	0	0	0	0	0
IGHVIII-44	0	0	0	0	0	0
IGHVII-43-1	0	0	0	0	0	0
IGHV3-43	0	0	0	0	0	0
IGHV3-42	0	0	0	0	0	0
HOMER2P1	0	0.000432921	0	0	0	0
IGHV3-41	0	0	0	0	0	0
IGHVII-40-1	0	0	0	0	0	0
IGHV7-40	0	0	0	0	0	0
IGHV4-39	0	0	0	0	0	0
IGHVIII-38-1	0	0	0	0	0	0
IGHV3-38	0	0	0	0	0	0
IGHV3-37	0	0	0	0	0	0
IGHV3-36	0	0	0	0	0	0
IGHV3-35	0	0	0	0	0	0
IGHV7-34-1	0	0	0	0	0	0
IGHV4-34	0	0	0	0	0	0
IGHV3-33-2	0	0	0	0	0	0
IGHVII-33-1	0	0	0	0	0	0
IGHV3-33	0	0	0	0	0	0
GOLGA4P1	0	0	0	0	0	0
IGHV3-32	0	0	0	0	0	0
IGHVII-30-21	0	0	0	0	0	0
IGHV4-30-2	0	0	0	0	0	0
IGHV3-30-2	0	0	0	0	0	0
IGHVII-30-1	0	0	0	0	0	0
IGHV3-30	0	0	0	0	0	0
GOLGA4P2	0	0	0	0	0	0
IGHV3-29	0	0	0	0	0	0
IGHVII-28-1	0	0	0	0	0	0
IGHV4-28	0	0	0	0	0	0
IGHV7-27	0	0	0	0	0	0
IGHVII-26-2	0	0	0	0	0	0
IGHVIII-26-1	0	0	0	0	0	0
IGHV2-26	0	0	0	0	0	0
IGHVIII-25-1	0	0	0	0	0	0
IGHV3-25	0	0	0	0	0	0
LINC00226	0	0.00733975	0	0	0	0
HOMER2P2	0	0	0	0	0	0
IGHV1-24	0	0	0	0	0	0
IGHV3-23	0	0	0	0	0	0
IGHVIII-22-2	0	0	0	0	0	0
IGHVII-22-1	0	0	0	0	0	0
IGHV3-22	0	0	0	0	0	0
IGHV3-21	0	0	0	0	0	0
IGHVII-20-1	0	0	0	0	0	0
IGHV3-20	0	0	0	0	0	0.000366193
LOC105370700	0	0	0	0	0	0
IGHV3-19	0	0	0	0	0	0
IGHV1-18	0	0	0	0	0	0
SLC20A1P2	0	0	0	0	0	0
IGHV1-17	0	0	0	0	0	0
IGHVIII-16-1	0	0	0	0	0	0
IGHV3-16	0	0	0	0	0	0
IGHVII-15-1	0	0	0	0	0	0
IGHV3-15	0	0	0	0	0	0
IGHV1-14	0	0	0	0	0	0
IGHVIII-13-1	0	0	0	0	0	0
IGHV3-13	0	0	0	0	0	0
IGHV1-12	0	0	0	0	0	0
IGHVIII-11-1	0	0	0	0	0	0
IGHV3-11	0	0	0	0	0	0
IGHV5-10-1	0	0	0	0	0	0
IGHV3-64D	0	0	0	0	0	0
IGHV3-7	0	0	0	0	0	0
IGHV3-6	0	0	0	0	0	0
IGHVIII-5-2	0	0	0	0	0	0
IGHVIII-5-1	0	0	0	0	0	0
IGHV2-5	0	0	0	0	0	0
IGHV7-4-1	0	0	0	0	0	0
IGHV4-4	0.00316353	0.002788	0	0	0	0
LOC107984634	0	0.00669445	0	0	0	0
IGHV1-3	0.0485946	0	0.0395018	0	0	0
IGHVIII-2-1	0	0	0	0	0	0
IGHV1-2	0	0	0	0	0	0
RPS8P1	2.11003	1.67613	1.63937	2.30663	1.52352	1.35155
ADAM6	0	0	0	0	0	0
IGHVII-1-1	0	0	0	0	0	0
IGHV6-1	0	0	0	0	0	0
IGHD1-1	0.0135329	0.0106013	0.0036669	0.00240829	0.00409223	0.00703515
FAM30A	32.0816	32.323	20.4685	11.6737	11.5144	13.2876
IGHD2-2	0.235847	0.4157	0.261432	0.0686796	0.213954	0.125393
IGHD3-3	0.0806869	0.0711087	0	0	0.0914962	0
IGHD4-4	0.0361395	0.00955482	0.00587544	0	0.00983542	0.00845427
IGHD5-5	0.0895303	0.110463	0	0.0191191	0.0649756	0.0209442
IGHD6-6	0.00571305	0.0100697	0.00232202	0	0.0064784	0.0033412
IGHD1-7	0.00321949	0.00709326	0.00261707	0	0.00146031	0.00188287
IGHD2-8	0.000666173	0.00176128	0.00162456	0	0.00241734	0.00311682
IGHD3-9	0.251505	0.110825	0.102222	0	0.0760528	0.0980595
IGHD3-10	0.0486664	0.0214446	0.0197801	0.0519634	0.0220744	0.0284619
IGHD4-11	0.00232656	0.00683458	0.00567366	0.00248417	0.00070353	0.00272131
IGHD5-12	0.00971057	0.00427892	0.00394678	0.00259211	0.00110115	0.00425932
IGHD6-13	0.014666	0.02585	0.0119217	0.00782979	0.00332615	0.0171544
IGHD1-14	0.0558321	0.0656058	0	0	0	0
IGHD2-15	0.0177156	0.0104084	0.019201	0	0.00535705	0
IGHD3-16	0.585091	0.756266	0.158537	0.0416487	0	0.0456244
IGHD4-17	0.036694	0.0269484	0.00497133	0	0.0110959	0
IGHD5-18	0.00371221	0.00654309	0.030176	0.00792742	0	0.00434208
IGHD6-19	0.0108827	0.00959082	0.00393172	0	0.00658165	0.00282871
IGHD1-20	0.712371	0.863234	0.0723843	0.285237	0.0807804	0
IGHD2-21	0	0	0	0	0	0
IGHD3-22	0	0	0	0	0	0
IGHD4-23	0	0	0.0102929	0	0	0
IGHD5-24	0.0171898	0.0302985	0	0	0	0
IGHD6-25	0	0.00426959	0	0	0	0
IGHD1-26	0	0	0	0	0	0
IGHJ1P	0	0	0	0	0	0
IGHD7-27	0	0	0	0	0	0
IGHJ1	0	0	0	0	0	0
IGHJ2	0	0	0	0	0	0
IGHJ2P	0	0	0	0	0	0
IGHJ3	0	0	0	0	0	0
IGHJ4	0	0	0	0	0	0
IGHJ5	0	0	0	0	0	0
IGHJ3P	0	0	0	0	0	0
IGHJ6	0	0	0	0	0	0
MIR4537	0	0	0	0	0	0
MIR4538	0	0	0	0	0	0
MIR4507	0	0	0	0	0	0
MIR4539	0	0	0	0	0	0
IGHM	0	0	0.039463	0	0	0
IGHD	0	0	0	0	0	0
ATP6V1G1P1	0	0	0	0	0	0
IGHG3	0	0	0	0	0	0
LOC105378184	0.176773	0.111278	0.071848	0.0808925	0.0229091	0.0738453
IGHG1	0	0	0	0	0	0
LOC107987211	0	0	0	0	0	0
IGHEP1	0	0	0	0	0	0
IGHA1	0	0	0	0	0	0
LOC105378185	0	0	0	0	0	0
ELK2AP	0	0	0	0	0	0
IGHGP	0	0	0	0	0	0
LOC105378187	0	0	0	0	0	0
LOC112268138	0	0	0	0	0	0
IGHG2	0	0	0	0	0	0
MIR8071-2	0	0	0	0	0	0
IGHG4	0	0	0	0	0	0
MIR8071-1	0	0	0	0	0	0
IGHE	0	0	0	0	0	0
IGHA2	0	0	0	0	0	0
IGH	0	0	0	0	0	0
LOC107987414	0	0	0	0	0	0
LOC105370698	0	0	0	0	0	0
ELK2BP	0	0	0	0.00642269	0	0
ATP5MC1P1	0	0	0	0	0	0
LOC105370697	0	0	0	0	0	0
TMEM179	0	0	0	0	0	0
C14orf180	0	0	0	0	0	0
CEND1P1	0	0	0	0	0	0
SERPINA1	0	0	0	0	0	0
SERPINA2	0	0	0	0	0	0
SERPINA6	0	0	0	0	0	0
SERPINA10	0	0	0	0	0	0
PPP4R4	0.0178414	0.0157235	0	0	0.0161852	0
LOC105370634	0	0	0	0	0	0
IFI27L2	0.00171204	0.00396061	0.00260941	0.00616958	0.00232967	0.00675852
IFI27	0.0858931	0.108814	0.100368	0.664913	0.24837	0.194654
IFI27L1	1.24652	1.24071	0.512597	1.51887	0.85143	0.60036
DDX24	3.77404	3.3286	5.98422	3.99241	6.58324	7.02011
OTUB2	0.052497	0.0925304	0.0682784	0.078475	0.0190496	0.0859661
CCDC197	0	0	0	0	0	0
LOC107984663	0	0	0	0	0	0
MIR4506	0	0	0	0	0	0
ASB2	0	0.00518933	0	0	0	0
FAM181A	0	0	0	0	0	0
FAM181A-AS1	0	0	0	0	0	0
LOC105370631	0	0	0	0	0	0
PRIMA1	0	0	0	0	0	0
RNU6-1258P	0	0	0	0	0	0
COX8C	0	0	0	0	0	0
UNC79	0.200354	0.264856	0.244297	0.320892	0.302927	0.468698
RPL36AP4	0	0	0.0529293	0	0	0
BTBD7	17.0121	18.4792	16.8304	18.9038	18.1546	19.4358
RPL18AP1	0	0.0293293	0.0541055	0	0.150953	0.155707
UBR7	34.6673	35.6245	39.8506	32.7421	41.8623	39.7368
GON7	5.12608	5.99448	5.50246	6.73645	7.15422	5.8421
TMEM251	8.39324	9.97607	9.60569	11.8509	13.5251	9.49441
MOAP1	17.9384	19.6528	13.942	15.512	12.614	10.8171
CYB5AP3	0	0	0	0	0	0
ITPK1-AS1	0.00362349	0	0	0.00386897	0	0
ITPK1	0.682596	0.677303	1.00995	0.867792	0.981195	1.17321
CHGA	0	0.00274867	0	0	0.0014147	0
LINC02287	0	0	0	0	0	0
LINC02833	0	0	0	0	0	0
TC2N	0.0208923	0.0207137	0.050949	0	0	0
LOC100128939	0	0	0	0	0	0
NANOGP7	0	0	0	0	0	0
POLR3GP1	0.00246295	0.00434115	0.00667364	0	0.00595819	0.00960282
CATSPERB	0	0	0.00165493	0	0	0
LOC101928957	0	0	0	0	0	0
LINC00552	0	0	0	0	0	0
LOC105377805	0	0	0	0	0	0
GRK1	0.01279	0.0112718	0.0415873	0.0136565	0	0
TUBGCP3	0.664342	0.714616	0.672828	0.639578	0.643989	0.686734
LOC105370372	0	0	0	0	0	0
SPACA7	0	0	0	0	0	0
LOC105370373	0	0	0	0	0	0
LINC01044	0	0	0	0	0	0
LINC01043	0	0	0	0	0	0
LOC107984555	0	0	0	0	0	0
LOC101928730	0	0	0	0	0	0
LINC01070	0	0	0	0	0	0
LOC105370370	0	0	0	0	0	0
ATP8A2	0	0.0302249	0.0557575	0	0	0
RNU6-76P	0	0	0	0	0	0
RNU6-55P	0	0	0	0	0	0
RHOT1P3	1.11685	1.35337	0.652533	1.00619	1.20315	1.10223
ANKRD20A9P	0.00577952	0	0	0.00617107	0	0
LINC00328-2P	0	0	0	0	0	0
SNX18P26	0	0	0	0	0	0
CYP4F34P	0	0	0	0	0	0
LINC00417	0	0	0	0	0	0
ZNF965P	0	0	0	0	0	0
CNN2P12	0	0	0	0	0.000389582	0
GXYLT1P1	0	0	0	0	0	0
BCYRN1P3	0	0	0	0	0	0
PIWIL1	0	0	0	0	0	0
LOC101927786	0	0	0	0	0	0
LINC02825	0	0	0	0	0	0
LOC107984448	0	0	0	0	0	0
LOC101927531	0	0	0	0	0	0
LOC105379613	0	0	0	0	0	0
CCDC92	0.554224	0.559127	0.429772	0.649196	0.499469	0.300674
DNAH10	0.0793429	0.11217	0.130337	0.0547138	0.0884726	0.0928053
ANO4	0	0	0	0	0	0
RNU6-768P	0	0	0	0	0	0
SLC5A8	0	0	0	0	0	0
RPS6P19	0	0	0	0	0	0
METTL15P2	0	0	0	0	0	0
RPS6P22	0	0	0	0	0	0
LOC107987421	0	0	0	0	0	0
GIHCG	3.90965	3.61708	2.8823	6.569	3.29339	3.36542
ATP23	0.529909	0.617955	0.596095	0.82871	1.06826	0.745037
LOC100533641	0.0076026	0.00167503	0.00154501	0.00811766	0.00862109	0.00444628
RN7SKP65	0	0	0	0	0	0
ST13P8	0	0	0	0	0	0
LINC02403	0	0	0	0	0	0
LOC105369784	0	0	0	0	0	0
FLJ13224	0.0063101	0.0222442	0.0461644	0.0202128	0.00572435	0.0221423
SINHCAF	1.74623	1.65693	1.39978	1.36543	1.31924	1.11103
LOC100419525	0.00176006	0	0.00286145	0.0018793	0.00638671	0.00205869
MREGP1	0	0	0	0	0	0
RPL13AP22	0.45462	0.702267	0.514883	0.719947	0.384615	0.394336
MTCYBP26	0	0.00961777	0	0.0116526	0	0
MTND6P26	0	0	0	0	0	0
MTND5P43	0	0.0286729	0	0	0	0
LOC107987168	0	0	0	0	0	0
LOC101060058	0	0	0	0	0	0
OVOS2	0.308638	0.374001	0.125444	0.370741	0.139994	0
PRB2	0.000907252	0	0	0	0	0
TAS2R18P	0.0411839	0.108885	0.0334778	0	0	0
TAS2R43	0.000624669	0	0	0	0	0
TAS2R64P	0	0.0130636	0.00602479	0	0.00672362	0.0173384
LOC574538	0	0	0	0.000658614	0	0
LOC105369593	0	0	0	0	0	0
IQSEC3	2.09503	1.47707	1.77472	1.29509	3.82112	1.59928
FAM138D	0.000486118	0.000856824	0	0	0.000440993	0
LOC107987170	0.00754054	0.00664542	0	0.0080514	0.0342029	0.00881997
WASH8P	0.200271	0.207598	0.172479	0.250578	0.208093	0.224965
DDX11L8	0.0447753	0.0591901	0.0454964	0.0298804	0.0355416	0.0523724
LINC02697	0	0	0	0	0	0
LOC338694	0	0	0	0	0	0
LOC105369366	0	0	0	0	0	0
LOC107987426	0	0	0	0	0	0
OR5G3	0	0	0	0	0	0
OR5G5P	0	0	0	0	0	0
OR5G4P	0	0	0	0	0	0
OR5G1P	0	0	0	0	0	0
OR9G2P	0	0	0	0	0	0
MIR6128	0	0	0	0	0	0
OR9G4	0	0	0	0	0	0
OR9G3P	0	0	0	0	0	0
OR9G9	0	0	0	0	0	0
OR9G1	0	0	0	0	0	0
OR8U9	0	0	0	0	0	0
OR8U8	0	0	0	0	0	0
RPL5P29	0.428117	0.353715	0.435012	0.799961	0.534017	0.375567
OR8J1	0	0	0	0	0	0
OR8K1	0	0	0	0	0	0
OR8K2P	0	0	0	0	0	0
FAM8A2P	0	0	0	0	0	0
OR8K3	0	0	0	0	0	0
OR8I1P	0	0	0	0	0	0
OR8H1	0	0	0	0	0	0
OR5T1	0	0	0	0	0	0
OR5T3	0	0	0	0	0	0
OR5T2	0	0	0	0	0	0
OR8J2	0	0	0	0	0	0
NAA50P1	0	0	0	0	0	0
NLRP10	0	0	0	0	0	0
OR10A3	0	0	0	0	0	0
OR10A6	0	0	0	0	0	0
LOC107984307	0	0	0	0	0	0
RNU6-943P	0	0	0	0	0	0
LOC283299	0	0	0	0	0	0
OR5E1P	0	0	0	0	0	0
OR5P3	0	0	0	0	0	0
OR5P2	0	0	0	0	0	0
RPL7AP55	0	0.214025	0	0	0	0
RNU1-91P	0	0.070935	0	0	0	0
CARS1-AS1	0.0306961	0.0541044	0	0	0	0.107713
CARS1	72.956	69.4733	19.8619	65.7581	22.3539	22.314
SNORA54	0	0.0304787	0	0.0369271	0.0313738	0.0404521
NAP1L4	84.8497	85.5977	98.4577	81.0282	100.779	93.2982
PHLDA2	0.279371	0.34469	0.658579	0.178979	0.430844	0.196064
SLC22A18	0.646929	0.692304	0.112688	0.370048	0.188639	0.0810744
SLC22A18AS	0.180863	0.199241	0	0.144837	0	0
LOC107987413	0	0	0	0	0	0
CDKN1C	0.12321	0.0965187	0	0.0438522	0.0372574	0
KCNQ1DN	0	0	0	0	0	0
KCNQ1-AS1	0	0	0	0	0	0
LOC107987412	0	0	0	0	0	0
COX6CP18	0	0	0	0	0	0
KCNQ1	0.0451743	0.0796235	0	0.0482348	0	0.0528392
DEAF1	71.4338	70.0852	71.152	85.0991	72.2224	80.7046
DRD4	0.447651	0.946827	0.436666	1.14715	1.13707	0.209442
SCT	0.252147	0.370358	0	0.179486	0.22874	0
CDHR5	0.533317	0.548343	0.361271	0.284724	0.403176	0.519839
IRF7	27.4364	25.4195	16.2266	22.0653	11.1684	12.2401
PHRF1	72.147	85.4391	130.343	71.9313	123.046	134.389
LOC143666	1.04297	0.212114	0.717381	0.428319	0.582248	0.750728
MIR210	0	0	0.00338844	0	0	0
MIR210HG	1.63696	0.75567	1.64749	0.332926	0.636432	1.27647
RASSF7	10.7885	9.85734	14.5733	18.0414	18.5665	17.2583
LMNTD2-AS1	0.634616	1.67785	0.644836	0.592908	1.07945	0.55672
LMNTD2	8.09274	4.70855	4.59854	8.97658	4.9181	3.67606
LRRC56	0.637575	0.764373	0.420223	0.545842	0.396016	0.248585
HRAS	21.9747	23.3975	30.1118	20.3031	27.2579	25.7032
LOC101059906	0.164516	0.55095	0.320959	0.210794	0.238792	0.346375
LOC105376507	0	0	0	0	0	0
RNH1	374.546	383.646	359.679	914.81	686.996	623.322
PTDSS2	87.5453	85.8637	90.9639	121.745	99.4869	105.152
DLG5-AS1	0.472926	0.520982	0.672759	0.378724	1.28708	0.138292
RN7SL284P	0	0	0.0982233	0	0	0
LOC101929347	0	0	0	0	0	0
DLG5	72.6229	88.2328	67.2384	48.0618	43.3597	55.2279
IMPDH1P5	0.10767	0.094889	0.105028	0	0.117211	0.125939
RNU6-1266P	0	0	0	0	0	0.072348
MARCHF8	105.824	112.202	132.492	88.7635	91.1508	105.276
LOC102724323	0.11232	0	0	0	0	0
ALOX5	83.7194	86.3355	60.7499	54.5239	14.5136	23.3275
OR13A1	0	0.194873	0.179746	0	0.100298	0
OR6D1P	0	0	0	0	0	0
CUBNP2	0	0	0	0	0	0
LOC105378283	0	0	0	0	0	0
RNU6-1207P	0	0	0	0	0	0
LOC101929816	0	0	0	0	0	0
PABPC1P8	0	0	0	0	0	0
LOC101929373	0	0	0	0	0	0
LOC105378267	0	0	0	0	0	0
LOC107984164	0	0	0	0	0	0
KSR1P1	0	0	0	0	0	0
PTCHD3	0	0	0	0	0	0
TRIAP1P1	0	0	0	0	0	0
FAM210CP	0	0	0	0	0	0
LINC02673	0	0	0	0	0	0
RNU6-452P	0	0	0	0	0	0
RNU6-666P	0	0	0	0	0	0
LOC102724245	0	0	0	0	0	0
ODAD2P1	0	0	0	0	0	0
FYTTD1P1	0	0	0	0	0	0
BAAT	0.0932466	0	0.0757987	0.199128	0.422954	0
LOC100421197	0	0	0	0	0	0
ACNATP	0	0	0	0	0	0
LOC105376182	0	0	0	0	0	0
LOC105376183	0	0	0	0	0	0
TRPC6P4	0	0	0	0	0	0
PLPPR1	0	0	0	0	0	0
GAPDHP26	0	0	0	0	0	0
LOC100129340	0	0	0	0	0	0
LOC389768	0.0027076	0.000477237	0.000220096	0.000289103	0.000736878	0
RNU2-5P	0	0	0	0	0	0.00349429
MAMDC2-AS1	0.00924558	0	0	0	0	0
LOC105379611	0	0	0	0	0	0
MAMDC2	0	0.0619546	0	0	0	0
APBA1	0	0	0	0	0	0
LOC101929802	0	0	0	0	0	0
RPL4P5	19.7204	21.2493	17.3284	22.2499	18.9038	19.5177
LOC107987408	0	0	0	0	0	0
LOC107986986	0.0596328	0.0722616	0.0545339	0.0159182	0.0338108	0.0610321
ZNF251	1.56897	1.54677	1.2723	1.52924	1.37508	1.27085
LOC100996662	0.0208526	0.0367545	0.0678031	0.0222653	0.151335	0
PUF60	78.7806	81.5833	111.432	77.015	107.138	115.979
MIR937	0	0	0	0	0	0
SCRIB	217.836	235.71	302.452	217.131	280.85	335.82
LOC105375800	0	0	0	0	0	0
IQANK1	1.95902	2.19732	1.66484	1.61634	3.47356	1.45817
MIR4664	0.0296601	0.015376	0.0127642	0.0223549	0.0253241	0.0530593
FAM83H	6.97269	5.80437	4.30662	7.80614	7.61097	7.11981
MAPK15	0.475303	0.523601	0.456615	0.703585	1.43074	0.846559
LOC101928160	0	0	0	0.039011	0.0110481	0
CCDC166	0	0	0	0	0	0
LINC02878	0.00470449	0.00621905	0.00382421	0.0100464	0	0.00275136
ZNF707	3.52567	3.625	2.75902	3.09964	2.27547	2.36969
LOC105375799	0	0.00277432	0	0	0.00428369	0
ZNF623	16.6899	16.5881	15.0744	13.8935	15.0846	15.3643
GFUS	15.0653	14.5217	14.2706	19.2344	16.6115	21.0125
PYCR3	6.28271	8.41435	17.4929	9.66636	23.1571	24.7079
TIGD5	25.7619	27.5688	37.3954	34.3372	43.7203	39.7673
EEF1D	272.873	260.187	281.003	328.634	262.534	308.118
NAPRT	1.47384	1.44284	1.24232	1.86051	2.88481	1.03392
MROH6	14.2771	15.1532	10.6013	16.6735	14.9444	9.95549
LOC100310756	2.4564	2.60225	2.37957	3.28871	2.1591	2.26282
GSDMD	54.0055	54.5331	43.9773	57.6305	30.0609	39.2401
RN7SKP175	0	0	0	0	0	0
ZC3H3	76.9083	85.6019	80.5782	94.2844	77.9089	105.783
LY6H	0	0	0	0	0	0
LY6L	0	0	0	0	0	0
LOC107984154	0	0	0	0	0	0
LOC102725000	0	0	0	0	0	0
LOC105379589	0	0	0	0	0	0
LOC105375795	0	0	0	0	0	0
LINC02904	0.0256568	0.0150741	0.00926934	0.0182633	0.0129306	0
LY6E	43.0156	42.3213	41.4083	58.5717	39.4719	41.2174
LY6E-DT	0.0350857	0.088345	0.0244462	0.085629	0.0545636	0.0996657
MIR1302-7	0	0	0	0	0	0
HNRNPA1P38	0	0	0.000455201	0	0	0
FP248	0	0	0	0	0	0
MROH5	0	0	0	0	0.216585	0
PTP4A3	0.849654	0.855637	0.568093	0.587337	0.434474	0.360376
LOC105375790	0	0	0	0	0	0
LOC101928037	0	0.00263644	0	0	0	0
GPR20	0	0	0.0479109	0.125865	0.0802024	0
LINC01300	0.00248551	0.00219046	0	0.00663475	0	0
LINC00824	0	0	0	0	0	0
RNU6-596P	0	0	0	0	0	0
LINC00588	0	0	0	0	0	0
LOC286177	0	0	0	0	0	0
LINC01606	0	0	0	0	0	0
ADAM2	0	0	0	0	0	0
ADAM18	0	0	0	0	0	0
LOC100130964	0	0	0	0	0	0
ADAM5	0	0	0	0	0	0.0119163
LOC100420403	0	0	0	0	0	0
RPL3P10	0.00132261	0.000582803	0.00107513	0.000706108	0.00119984	0.000773512
ADAM32	0.0214779	0	0.0523772	0	0	0.0502443
ADAM9	1.4645	1.55602	0.812189	1.48188	1.21929	0.845287
LOC107986910	0.13795	0.101312	0.046724	0.0490987	0	0
OR7E157P	0	0	0	0	0	0
FAM90A23	0	0	0	0	0	0
FAM90A22	0	0	0	0	0	0
FAM90A21P	0	0.00165407	0	0	0	0
LOC105377800	0	0	0	0	0	0
FAM90A7	0	0	0	0	0	0
FAM90A6P	0	0	0	0	0	0
PRR23D1	0	0	0	0	0	0
LOC101927997	0	0	0	0	0	0
LOC105377801	0	0	0	0	0	0
DEFB107B	0	0	0	0	0	0
DEFB105B	0	0	0	0	0	0
DEFB106B	0	0	0	0	0	0
DEFB104B	0	0	0	0	0	0
SPAG11B	0	0	0	0	0	0
DEFB103B	0	0	0	0	0	0
HSPD1P3	0	0.0150498	0.0416448	0.0182339	0	0
DEFB4B	0	0	0	0	0	0
DEFB108C	0	0	0	0	0	0
ZNF705G	0	0	0	0	0	0
ZNF705CP	0	0	0	0	0	0
FAM66D	0	0.0122377	0.0338634	0	0	0
LOC649352	0	0	0	0	0	0
DEFB109B	0	0.00161485	0	0	0	0
LOC105377785	0.628229	0.545265	0.247601	0.335395	0.431752	0.289476
LOC107986865	2.05786	2.40865	1.54211	1.30463	1.60431	1.12829
LOC101927815	2.11138	1.89228	1.27996	1.83411	1.03886	1.25574
LOC107987411	0	0	0	0	0	0
LOC105377784	0	0	0	0	0	0
LOC105377783	0	0	0	0	0	0
LOC105377782	0.0148452	0.0145925	0.00974675	0.0048772	0.00414373	0.00400708
LOC105377781	0.0210051	0.0259162	0.0170747	0.00448562	0.0133387	0.00737072
[truncated: 52,629 more rows]

## Sheet: sgHDAC7 F36P TPM
	F36P HDAC7 1	F36P HDAC7 2	F36P HDAC7 3	F36P NT 1	F36P NT 2	F36P NT 3
TRNP	8.05923	8.15988	9.19973	8.71198	10.559	8.00687
TRNT	0.313747	0.550818	0.626346	0.249991	0.572115	0.633025
CYTB	8.03645	7.38553	7.6856	8.41455	7.0573	5.28137
TRNE	0.115959	0.160875	0.237585	0.108425	0.142257	0.095774
ND6	76.224	62.5405	71.0376	62.1013	70.8055	42.9595
ND5	26.041	24.613	24.9962	28.6097	25.9144	18.6097
TRNL2	0.397455	0.0849468	0.396728	0.443364	0.352925	0.233893
TRNS2	0.233306	0.747956	0.419182	0.751846	0.932249	0.384425
TRNH	0.0944045	0.0848342	0.111365	0.0983948	0.11431	0.0757565
ND4	731.039	643.765	697.736	701.172	650.617	447.929
ND4L	695.773	662.976	638.259	838.975	659.184	505.096
TRNR	0.162638	0.156421	0.194809	0.268777	0.216625	0.127612
ND3	14.5614	17.3226	18.937	20.6355	23.0529	17.0339
TRNG	0.219779	0.198731	0.109689	0.272406	0.272092	0.149232
COX3	701.363	585.027	627.21	835.218	693.754	539.606
ATP6	170.424	146.503	157.896	164.666	168.697	114.189
ATP8	29.6104	22.546	26.2865	26.0164	24.9964	17.4504
TRNK	0.0362861	0.00646276	0.0241465	0.0149916	0.0671264	0.0640604
COX2	410.076	439.132	457.067	417.272	421.499	323.464
TRND	0.629545	0.197869	0.369643	0.458995	0.246623	0.523019
TRNS1	0.00957687	0.00682279	0.0159323	0.0316536	0.0177165	0.00375717
COX1	369.589	340.699	348.722	412.891	353.163	286.36
TRNY	0.0810564	0.0866197	0.216084	0.083313	0.0987462	0.0814386
TRNC	0.446962	0.364394	0.402639	0.608011	0.586221	0.425469
TRNN	5.90955	5.31802	5.04498	8.21343	6.8566	6.28414
TRNA	0.0175429	0.006249	0.00583695	0.0434873	0.00649061	0.0068824
TRNW	0.0174022	0.022316	0.0347408	0.0474524	0.0502207	0.0491558
ND2	723.495	695.356	751.434	702.588	722.472	539.225
TRNM	0.0285194	0.0685728	0.0498176	0.0530227	0.039569	0.0503489
TRNQ	1.05374	0.112606	0.946629	0.65303	0.35088	0.620099
TRNI	0.0337425	0.0150243	0.0168404	0.0209111	0.00936313	0.00992831
ND1	1818.21	1507.63	1642.49	1727.29	1555.53	1065.99
TRNL1	6.40339	6.1897	5.43292	8.40569	5.97672	4.00804
RNR2	48.3103	51.7631	50.6317	61.0629	64.6897	54.8126
TRNV	0.173334	0.133778	0.134569	0.0954844	0.192393	0.249341
RNR1	1.95599	2.30564	2.15419	2.68505	2.55884	2.28836
TRNF	0.0415262	0.0221882	0.0103626	0.115807	0.0345691	0
LILRP2	0	0	0	0	0	0
KIR3DL3	0	0	0	0	0	0
KIR2DS2	0	0	0	0	0	0
KIR2DL2	0	0	0	0	0	0
KIR2DL4	0	0	0	0	0	0
KIR3DS1	0	0	0	0	0	0
KIR2DL5A	0	0	0	0	0	0
KIR2DS5	0	0	0	0	0	0
KIR2DS1	0	0	0	0	0	0
KIR3DL2	0	0.0243603	0	0	0	0
KIR2DL3	0	0	0	0	0	0
KIR2DP1	0	0	0	0	0	0
LOC101928804	0	0	0	0	0	0
KIR2DL1	0	0	0	0	0	0
KIR3DP1	0	0	0	0	0	0
KIR3DL1	0	0	0	0	0	0
KIR2DS4	0	0	0	0	0	0
KIR2DL5B	0	0	0	0	0	0
RNU6-222P	0	0	0	0	0	0
NCR1	0.912702	2.14576	1.91317	2.03625	2.33003	3.54488
FCAR	0	0	0	0.00272497	0	0
LOC102725023	0	0	0	0	0	0
KIR2DS3	0	0	0	0	0	0
EPS8L1	0.394143	0.525856	0.453032	0.494444	0.339379	0.337373
RDH13	3.13484	3.17198	3.09383	3.29735	2.33649	2.67359
GP6	0.139506	0.117458	0.110768	0.231858	0.127865	0.0883154
GP6-AS1	0.0248351	0.0265397	0.019212	0.0246256	0.0130938	0.0233838
RPL36AP50	0.00570985	0	0	0.0106156	0	0
NLRP2	0.172178	0.10514	0.0900236	0.315029	0.118306	0.125447
NLRP7	0.00210766	0.00450464	0.010519	0	0.0023394	0.00992247
LILRP1	0.0522058	0.0474206	0.0156331	0.058236	0.0898162	0.0921655
LOC102724290	0	0	0	0	0	0
LILRB4	0	0	0	0	0	0
VN1R105P	0	0	0	0	0	0
MIR8061	0	0	0	0	0	0
LILRB1	0.00195246	0	0.00129926	0.00161332	0	0
LILRA1	0	0	0	0	0	0
LILRA2	0.0189097	0.0168396	0.00471877	0.0097657	0.0104944	0.0222558
LOC105372461	0	0	0	0	0	0
LOC107985347	0	0	0	0	0	0
KIR3DX1	0.00160514	0	0	0	0	0
LOC105372460	0	0	0	0	0	0
LAIR2	0	0	0	0	0	0
CDC42EP5	0.0439543	0.0626281	0.0731231	0.0363195	0.0650495	0.0689761
LENG9	1.57772	1.39902	1.54132	1.12338	1.34134	1.58034
LENG8	2.24695	2.40581	2.51064	2.25694	2.3134	2.35071
LENG8-AS1	0.0113521	0.0140467	0.00954217	0.0118488	0.0185688	0.0154705
TTYH1	0.0322573	0.0689425	0.0386379	0.055974	0.0143216	0.0379653
LAIR1	0.0910092	0	0.0227107	0.0141002	0.0631349	0.0133892
LILRA4	0	0	0	0	0	0.0176006
VN1R104P	0	0	0	0	0	0
LILRA5	0	0	0	0	0	0
LILRA3	0	0	0	0	0	0
MIR4752	0	0	0	0	0	0
LILRB2	0.016721	0.0402045	0	0.0259062	0.00463988	0.00983992
LOC100420187	0	0	0	0	0	0
LILRB5	0	0	0	0	0	0
LOC107987463	0	0	0	0	0	0
LILRA6	0.113025	0.0805218	0.0877477	0.0155655	0.0139392	0.0147806
LOC100421130	0.0105444	0.0338042	0	0	0.0117037	0.0248204
LOC107987462	0	0	0	0	0	0
RPS9	238.153	212.707	236.335	258.933	228.531	245.905
TSEN34	35.6858	35.2356	32.7286	37.3341	32.7187	32.1498
MBOAT7	11.2055	7.55525	7.69576	10.4976	8.13775	7.93894
TMC4	0.0224738	0.0229721	0.0156053	0.0157443	0.0108456	0.0161003
LENG1	0.208513	0.201779	0.1931	0.183781	0.183866	0.171787
LOC102724273	0.0203233	0.0135739	0.0253576	0.034636	0.0197382	0.0269095
CNOT3	4.0839	4.1592	3.83814	3.93373	3.82792	4.04895
PRPF31	2.8103	2.62577	2.88199	2.77798	2.57317	2.64678
TFPT	2.13124	1.73108	1.89357	2.19647	1.81534	1.80547
NDUFA3	2.56439	2.57301	2.85007	3.11188	3.27852	2.69159
OSCAR	0.0954002	0.10979	0.0879006	0.0879251	0.249791	0.285022
TARM1	0	0	0	0	0	0
VSTM1	0.00270419	0.00288979	0	0.0100552	0.00600304	0.0031827
LOC107987461	0	0	0	0	0	0
HCG23	0	0	0	0	0	0
BTNL2	0	0	0	0	0	0
TSBP1-AS1	0	0	0	0	0	0
HLA-DRA	0.355063	0.148071	0.146952	0.0214675	0.269144	0.28539
LOC102725035	0	0	0	0	0	0
LOC112268246	0	0	0	0	0	0
ZBTB9	9.70054	10.7085	9.58692	10.2377	7.53344	9.98522
MIR5004	0	0	0	0	0	0
SYNGAP1	21.0044	20.6586	20.8696	26.2333	24.385	23.3961
CUTA	32.8745	32.0628	32.1216	36.0149	32.6722	36.0925
PHF1	19.8814	23.0108	20.1303	24.209	24.0062	25.0441
RPL12P1	0.454613	1.06879	0.453781	0.78886	0.201839	0.74908
KIFC1	45.9386	41.8691	44.0621	42.3702	38.1969	39.196
SMIM40	0	0	0	0	0	0
RPS18	116.691	113.13	134.406	152.867	126.38	147.186
VPS52	52.9125	52.5371	48.1223	52.7464	51.4634	50.717
HCG25	0.0114873	0.0196412	0.0183461	0.014238	0.0178505	0.018928
LOC105375022	0.101089	0.216055	0.181628	0.175414	0.157086	0.166568
ZNF70P1	0	0	0	0	0	0
COL11A2	0.0354499	0.0284123	0.0304705	0.0390565	0.0306038	0.0347691
HLA-DPB2	0	0	0	0	0	0
COL11A2P1	0	0	0	0	0	0
HLA-DPA2	0	0	0	0	0	0
RPL32P1	0	0	0	0	0	0
HLA-DPB1	0.0233763	0.0749421	0.0233335	0	0.0518931	0
HLA-DPA1	0.000636543	0.000680232	0.000635378	0	0	0.00074918
HLA-DOA	0	0.0134062	0	0	0	0
BRD2	0.274553	0.287623	0.284703	0.27433	0.238695	0.234581
HLA-DMA	0.257177	0.244956	0.251126	0.242534	0.279249	0.282945
HLA-DMB	0	0	0	0	0	0
HLA-Z	0	0	0	0	0	0
LOC100294145	7.97649	11.787	9.01934	9.26859	8.64602	10.1214
PPP1R2P1	0.00388179	0.00829642	0.0116241	0.0048113	0	0.0274121
PSMB9	0.00815479	0.0087145	0.0158009	0.0071347	0.00212975	0.00846865
TAP1	0.0130021	0.0169094	0.0144476	0.0117066	0.014704	0.015736
PSMB8-AS1	0.00160945	0.00171991	0.00133875	0.00166236	0.00267962	0.00157853
PSMB8	0.35714	0.244367	0.272708	0.354552	0.262371	0.262081
TAP2	2.82674	2.774	2.59481	2.48808	2.26119	2.40644
HLA-DOB	0.00139088	0.000297268	0.000832999	0.000344786	0	0.000327399
HLA-DQB2	0	0	0	0	0	0
MIR3135B	0	0	0	0	0	0
HLA-DQA2	0	0	0	0	0.0328678	0
LOC102725019	0	0	0	0	0	0
HLA-DQB1	0	0.0116983	0	0	0.00607532	0
HLA-DQA1	0	0	0	0	0	0
LOC107987459	0	0	0	0	0	0
HLA-DRB1	0.0279725	0.0105503	0.011497	0	0.0237427	0.00774643
FAM8A5P	0	0	0	0	0	0
HLA-DRB7	0	0	0	0	0	0
LOC100294316	0	0	0	0	0	0
PRKRAP1	0	0	0	0	0	0
HLA-DRB8	0	0	0	0	0	0
HLA-DRB4	0	0	0	0	0	0
HLA-DRB9	0	0	0	0	0	0
RNU6-603P	0	0	0	0	0	0
HNRNPA1P2	0	0.00294297	0	0.0034134	0.00458514	0.00162064
TSBP1	0	0	0	0	0	0
NOTCH4	0.0170907	0.0791428	0.0568648	0.0494273	0.0316164	0.01341
GPSM3	3.8721	3.19681	3.24024	4.51572	3.72768	4.07462
PBX2	23.2618	23.1103	23.0778	19.3171	21.2589	20.4198
AGER	0.728674	0.835878	0.96157	1.1736	1.08753	0.973901
MIR6833	0	0	0	0	0	0
RNF5	0.79012	0.796732	0.800608	0.70721	0.772046	0.747016
MIR6721	0	0	0	0	0	0
AGPAT1	0.962895	1.03256	0.978654	0.710691	0.909194	0.898164
EGFL8	0.00126098	0.00269505	0.00503469	0	0.0055985	0
PPT2-EGFL8	0.0440604	0.0470844	0.0642781	0.0420083	0.0808812	0.0897524
PPT2	6.50588	7.9591	6.72906	5.89273	7.7767	8.57527
LOC100507547	0.199781	0.185027	0.265887	0.0660318	0.118265	0.31351
PRRT1	1.62362	2.89176	3.45738	1.87824	3.72442	3.43965
TNXB	0.0881347	0.133628	0.106019	0.0345456	0.0936447	0.0886583
CYP21A2	0.00217375	0.00232295	0.00247974	0.00461874	0.0051702	0.00146194
C4B	0.567279	0.415215	0.438255	0.568272	0.429831	0.467972
STK19B	0.184138	0.18164	0.240356	0.0877812	0.172941	0.233393
TNXA	0.23939	0.869789	0.812437	0.71211	0.850276	0.676201
CYP21A1P	0.0112081	0.00698679	0.0177137	0.0173649	0.0145139	0.00879426
C4B_2	0	0	0	0	0	0
STK19	1.18412	0.771578	0.910967	1.15265	1.02581	1.14211
DXO	0.313507	0.357591	0.382655	0.350324	0.420098	0.399572
SKIV2L	1.98625	2.08139	2.057	1.94911	1.85955	1.82058
MIR1236	0	0	0	0	0	0
NELFE	11.7123	8.7326	9.56096	10.2852	8.05269	8.79921
CFB	0.0122548	0.00436529	0.0101936	0.0151892	0.00226703	0.0168271
C2-AS1	0	0.0232077	0	0	0.024105	0
C2	0.00769598	0.0041121	0.0084501	0.0143082	0.00768796	0.0117751
LOC107986588	0.0149926	0.011444	0.0128273	0.00796399	0.00713189	0.012604
EHMT2	1.23595	1.1209	1.16139	0.994371	1.02888	1.03379
SLC44A4	0.0611456	0.0435615	0.101723	0.202099	0.135737	0.287862
NEU1	7.43953	6.51707	6.7407	8.31073	6.21972	6.72669
VARS1	19.5148	18.431	17.7135	17.7256	16.498	18.8658
VWA7	0.267502	0.285862	0.31646	0.368397	0.20894	0.151588
SAPCD1-AS1	0	0.0549387	0.0513161	0	0.142657	0
SAPCD1	0	0	0	0	0	0
RNU6-850P	0.0696824	0.0704399	0.082714	0.0303456	0.0585307	0.0421147
MSH5	0.0543568	0.038725	0.0587788	0.0393008	0.0553057	0.0693066
MSH5-SAPCD1	0	0.00590036	0.0055113	0.00912469	0.00408566	0
LOC105375020	0.0435433	0.0174495	0.0271648	0.0674624	0.0845792	0.0384363
CLIC1	102.717	83.204	89.3021	122.655	91.1098	94.5945
DDAH2	5.44429	3.43611	3.53049	5.73349	4.22597	4.03382
MPIG6B	7.60477	6.82084	5.89224	9.75748	9.10231	8.49282
LY6G6C	0.0247885	0.00662246	0.028867	0.0153621	0.0389782	0.0218811
LY6G6D	0	0	0.00569191	0.0212034	0.0253173	0.00671138
LY6G6E	0.101437	0.0903322	0.0928134	0.178112	0.121972	0.0895394
LY6G6F	0.0318229	0.0510106	0.0158823	0.078886	0.0706438	0.037454
LY6G6F-LY6G6D	0.0419827	0	0.0139686	0.0173452	0.0310659	0.0164705
MIR4646	0	0	0	0	0	0
LOC105375018	0.0755822	0.107693	0.234714	0.187361	0.121178	0.168029
ABHD16A	2.69582	2.57005	2.32987	2.73131	2.65701	2.45753
LOC105375019	0.00649641	0.00971921	0.00907834	0.0144936	0.00144214	0.00458758
LY6G5C	0.0536387	0.0573202	0.024711	0.0204562	0.0412175	0.00485617
LY6G5B	0.421244	0.418544	0.396852	0.466382	0.291569	0.324488
CSNK2B	0.959787	0.979465	0.969667	0.978901	0.955335	0.919248
GPANK1	7.04423	6.52719	5.88912	7.46003	5.44344	6.52413
C6orf47	1.0342	1.10518	1.17436	0.952559	0.947815	1.2507
APOM	0.0166985	0.0535338	0.0266687	0.0496729	0.0444829	0.047168
BAG6	19.5801	19.7675	18.8102	20.7521	20.1005	20.5613
MIR6832	0.0711391	0	0.0355045	0	0	0
SNORA38	0	0	0.0169683	0	0	0.0250093
PRRC2A	13.2733	13.2573	12.2221	12.8175	12.6607	13.2713
AIF1	0.97905	0.597568	0.689719	0.952121	0.652019	0.61825
UQCRHP1	0.0166903	0	0	0	0	0.0196437
NCR3	0.275631	0.107109	0.0500231	0.155287	0.0834375	0.147457
LST1	10.1185	9.40794	9.41528	16.0134	9.83514	9.35229
LTB	0.11098	0.0418577	0.0847116	0.129463	0.101444	0.115251
TNF	0.0016376	0.00699997	0.00980761	0.00405945	0.0127236	0
LTA	0.0101689	0.0126779	0.0101503	0.00840256	0.00376232	0.00398942
LOC100287329	0.00177458	0.00379275	0.00354266	0.00879802	0.00393939	0.00626577
NFKBIL1	0.188801	0.195432	0.22457	0.199764	0.216131	0.253953
ATP6V1G2	0.00754522	0.00302365	0.00800213	0.0105209	0.00523427	0.00444018
DDX39B-AS1	0.00217211	0.00928478	0.015177	0.0080767	0.0168766	0.00511294
SNORD84	1.36384	2.01266	1.03721	1.12694	2.16256	1.29942
SNORD117	0	0.00387943	0	0.00149985	0.00402942	0
DDX39B	0	0	0	0	0	0
ATP6V1G2-DDX39B	0.00123443	0.00263832	0.0049287	0.00765012	0.00411049	0.00726435
MCCD1	0	0	0.0137788	0	0	0
RPL15P4	0	0	0	0	0	0
PPIAP9	0	0.00222365	0.00207703	0	0	0
MICB	0.702432	0.613786	0.60043	0.76481	0.615979	0.639459
MICB-DT	0.0155526	0.0129267	0.0224237	0.0192767	0.0191807	0.0122031
HCG26	0	0	0	0	0	0
HCP5	0.00503261	0	0	0	0	0
HLA-X	0	0	0	0	0	0
LINC01149	0	0	0	0	0	0
MICA	0.138139	0.185076	0.191395	0.194217	0.176213	0.133464
MICA-AS1	0.0186983	0.0279744	0.0124427	0.0108153	0.017987	0.0234742
LOC105379664	0	0	0	0	0	0
MIR6891	0.032015	0	0	0	0	0
HLA-B	3.69254	4.25443	3.68579	4.16964	4.13169	4.75594
LINC02571	0	0	0	0	0	0
RPL3P2	0.553212	0.985303	0.683677	0.65303	0.46784	1.08517
USP8P1	0.136677	0.0182572	0.05116	0.0423511	0.113778	0.0402155
HLA-C	11.5304	12.7985	10.1049	8.59183	9.71289	10.905
HCG27	0.994465	0.53136	0.46875	0.342387	0.766534	0.617731
PSORS1C3	0	0	0	0	0	0
POU5F1	0.549935	0.587679	0.439143	0.545295	0.366241	0.388348
TCF19	28.2086	24.5128	23.5432	20.9351	14.5763	18.5067
RNU6-1133P	0	0	0	0	0	0
HCG22	0	0	0	0	0	0
MUC22	0	0	0	0	0	0
LINC00243	0	0	0	0	0	0
HCG20	0	0	0	0	0	0
RN7SL353P	0	0	0	0	0	0
IER3	0.161903	0.374866	0.0538689	0.200671	0.299507	0.158793
IER3-AS1	0	0.0569314	0.132944	0.0330159	0.0591326	0.219457
FLOT1	51.6374	45.88	48.4055	47.6056	46.3121	47.5221
TUBB	506.421	486.063	476.713	459.852	420.113	397.815
MDC1-AS1	0.00833496	0	0	0	0	0
MDC1	46.4549	46.9087	45.9032	44.4649	42.6867	41.991
LOC107987457	0	0	0	0	0	0
DHX16	23.1795	23.7016	20.9906	22.6864	21.5928	23.9557
C6orf136	6.34873	7.51009	8.23487	6.69072	6.40618	5.87383
PTMAP1	0	0.0631319	0	0.0732234	0.0655728	0.0695309
ATAT1	5.67783	6.32756	6.35563	6.08233	5.3568	5.82335
MRPS18B	32.5544	32.9321	31.8103	32.3591	35.1189	33.2028
PPP1R10	69.8283	58.0596	53.0985	62.9887	54.8329	55.9723
MIR877	0	0	0	0	0	0
ABCF1	170.352	162.01	160.71	177.494	151.779	148.58
ABCF1-DT	0.205221	0.131584	0	0.0508723	0.227785	0.144921
PRR3	16.7138	13.0317	13.6231	18.2673	13.4852	13.4172
GNL1	20.5013	18.5808	18.757	19.0522	16.5422	17.2865
LINC02569	0.141505	0.151217	0.047082	0.116926	0.0523546	0.11103
HLA-E	43.7854	31.1164	32.8764	41.5227	39.2073	34.679
RANP1	46.9023	49.513	44.3248	51.0226	45.5944	48.8105
SUCLA2P1	0	0.113483	0	0	0	0
LOC105375012	0	0	0	0	0	0
MICC	0	0	0	0	0	0
UBQLN1P1	0	0	0	0	0	0
HLA-N	0	0	0	0	0	0
RPP21	0.232607	0.248572	0.265351	0.144153	0.11065	0.117329
TRIM39-RPP21	0	0	0	0	0	0
TRIM39	1.51805	1.84112	1.81593	1.64263	2.19313	1.64488
HCG18	2.56749	2.54773	2.73713	2.84674	2.21004	2.41539
HLA-L	0.124592	0.0832146	0.0466366	0.0772131	0.0172864	0.128309
HCG17	0.12806	0.171062	0.0319564	0.0793622	0.106605	0.0376801
PAIP1P1	0	0.109386	0.238405	0.0422906	0	0.0803159
TRIM26	8.82605	8.77117	8.20595	7.82556	8.19051	8.87068
TRIM15	6.94131	8.87935	8.43038	10.2987	12.5625	12.1538
TRIM10	0.354914	0.398861	0.378382	0.460553	0.504907	0.511851
TRIM40	6.05644	3.66186	4.61357	3.16071	3.53809	3.65786
TRIM31-AS1	0	0	0	0	0	0
TRIM31	0.00799035	0	0.00797573	0	0	0
RNF39	0.04794	0.0429674	0.0277852	0.0498357	0.0343298	0.0527829
PPP1R11	15.8343	15.5599	12.1935	11.9836	10.6994	10.5957
POLR1H	10.4941	9.77537	11.9118	11.971	11.9314	11.9685
ETF1P1	0.249265	0	0.248809	0.154477	0.691682	0
HLA-J	0.0576362	0.104707	0.126568	0.0714375	0.0703708	0.128887
HCG4P3	0.0168673	0.0720997	0.202037	0.125437	0.0748874	0.0397039
ZNRD1ASP	1.8026	2.482	1.48789	1.58975	1.96233	1.87678
LOC353007	0	0	0	0	0	0
MCCD1P2	0	0	0.0125701	0	0	0
DDX39BP2	0.00540623	0.00577729	0	0.00335039	0.00600066	0.00318144
HCG9	0	0	0	0	0	0
HLA-A	0.312722	0.315269	0.362212	0.432703	0.355839	0.351855
HLA-K	0	0.027678	0	0.0642046	0	0
HCG4B	0	0	0	0	0	0
DDX39BP1	0	0	0	0	0	0
HLA-H	2.07315	1.9939	2.04349	1.54175	1.17931	1.9825
HCP5B	0.0145001	0	0.0144736	0	0	0.0170659
LOC105375010	0.0129502	0.041517	0.025853	0	0.0143741	0
HCGVIII-2	0	0	0	0	0	0
HLA-G	0.00242495	0.00414621	0.00266256	0.00420785	0.00215326	0.00199783
MICG	0	0	0	0	0.0395985	0
RPL7AP7	0	0.0722018	0	0	0	0.0397601
HLA-P	0	0	0	0	0.136907	0
HCG4P9	0	0	0	0	0	0
HLA-V	0	0	0	0	0	0
HCG4	0	0	0.133465	0	0	0
LOC353010	0	0	0	0	0	0
LOC105379663	0	0	0	0	0	0
IFITM4P	0	0.0354486	0	0	0	0
MICE	0	0.035498	0	0	0	0
HLA-F-AS1	0	0	0	0	0	0
HLA-F	0	0.0190391	0.00222296	0.00276031	0.00494381	0.00786335
ZDHHC20P1	0	0	0	0	0	0
ZFP57	0.394464	0.296256	0.300126	0.348741	0.367415	0.293818
MOG	0.0182018	0.0194511	0.0151405	0	0.016836	0.0071409
SUMO2P1	0.962579	0.858109	0.869587	0.898176	0.886456	0.897277
GABBR1	11.4547	11.9167	14.1786	14.0331	14.9244	13.7272
OR2I1P	0.00717378	0	0.00238689	0.00592771	0	0
GPR53P	0	0	0	0	0	0
LINC01015	0	0	0	0	0	0
LINC02829	0.176934	0.108045	0.0883053	0.626577	0.280555	0.237992
RPS17P1	0.0139656	0	0	0.00865484	0	0
MAS1L	0.0832915	0.115711	0.0581974	0.237443	0.110939	0.088227
LOC105375008	0.0155046	0.00753124	0.00140693	0.0139761	0.0203383	0.0232249
MAS1LP1	0.0158053	0.0144772	0.00901509	0.00559713	0.0075185	0.0186021
UBDP1	0	0	0	0	0	0
OR2H1	0	0	0	0	0	0
LOC105379641	0	0	0	0	0	0
OR10C1	0	0	0	0	0	0
OR11A1	0	0	0	0	0	0
OR12D1	0	0	0	0	0	0
OR12D2	0	0	0	0	0	0
OR12D3	0	0	0	0	0	0
OR5V1	0	0	0	0	0	0
DDX6P1	0	0.00310529	0	0	0	0
OR14J1	0	0	0	0	0	0
OR2B4P	0	0	0	0	0	0
LOC105375005	0	0	0	0	0	0
OR2U2P	0	0	0	0	0	0
OR2U1P	0	0	0	0	0	0
OR2G1P	0	0	0	0	0	0
LOC101929006	0	0	0	0	0	0
OR2H4P	0	0	0	0	0	0
OR2J4P	0	0	0	0	0	0
OR2J2	0	0	0	0	0	0
OR2N1P	0	0	0	0	0	0
OR2J3	0	0.00810249	0	0	0	0
OR2J1	0	0	0	0	0	0
OR2B3	0	0	0	0	0	0
SAR1AP1	0	0.00128325	0	0	0	0.00141332
OR2P1P	0	0	0	0	0	0
OR2W1	0	0	0	0	0	0
LOC100129636	0	0	0	0	0	0
OR2AD1P	0	0	0	0	0	0
LOC105375002	0	0	0	0	0	0
ZNF311	0.0547412	0.0584984	0.14571	0.158315	0.0202534	0.10738
TRL-AAG3-1	0	0	0	0.0321023	0.0287481	0.0457252
HCG15	0.0247414	0.0352526	0.0576242	0.0102219	0.0640774	0.00970646
TRE-CTC1-6	0	0	0	0	0.00281195	0
TRF-GAA1-2	0	0	0	0	0	0
RN7SL471P	0	0.0177655	0.00553135	0.00686841	0	0
KRT18P1	0	0	0	0	0	0
TRM-CAT3-2	0	0	0	0	0	0
TRK-TTT3-3	0	0	0	0	0	0
TRM-CAT3-1	0	0	0	0	0	0
LINC01556	0	0	0	0.0026988	0	0
TRL-AAG2-2	0	0	0	0	0	0
TRQ-CTG1-3	0	0	0	0	0	0
TRL-CAA1-2	0	0	0	0	0	0
RNU6-930P	0	0	0.000422268	0.000524341	0	0.0004979
TRIM27	1.83103	1.67445	1.84249	2.05062	1.60085	1.68875
HCG14	0.00364393	0	0	0	0	0.00142958
TRL-CAA1-1	0	0	0.0606196	0	0	0
ZNF90P2	0	0	0	0	0	0
TRR-CCG1-2	0	0	0	0	0	0
TRA-AGC2-2	0	0	0	0	0	0
RPL13P	0	0	0	0	0	0
LINC01623	0	0	0	0	0	0
TRA-AGC2-1	0	0	0	0	0	0
TRF-GAA4-1	0	0	0	0	0	0
TRA-TGC5-1	0	0	0	0	0	0
TRF-GAA3-1	0	0	0	0	0	0
TRA-TGC7-1	0	0	0	0	0	0
TRA-AGC1-1	0	0	0	0	0	0
TRF-GAA1-1	0	0	0	0	0	0
TRA-TGC1-1	0	0	0	0	0	0
NOP56P1	0.0428495	0.137371	0.0855422	0.05311	0.0475609	0.0252159
TRA-AGC23-1	0	0	0	0	0	0
TRA-TGC6-1	0	0	0	0	0	0
TRK-TTT7-1	0	0	0	0	0	0
TRR-CCG1-1	0	0.000859719	0	0	0	0
RPSAP2	0	0	0	0	0	0
TRA-CGC4-1	0	0	0	0	0	0
TRF-GAA11-1	0	0	0	0	0	0
TRT-AGT3-1	0	0	0	0.00554182	0	0
TRA-AGC7-1	0	0	0	0	0	0
TRA-CGC5-1	0	0	0	0	0	0
TRK-TTT13-1	0	0	0	0	0	0
LOC100288016	0	0	0	0	0	0
LOC105374297	0.150819	0.282049	0.301087	0.514068	0.292954	0.355014
LOC105374298	0.0402784	0.0258257	0.0357375	0.0410479	0.0437136	0.0326572
SDHAP2	0.111309	0.173647	0.158953	0.134941	0.167736	0.191248
MIR570	0.269865	0.288387	0.396134	0.295134	0.123339	0.186834
SMBD1P	0.023095	0.0311184	0.0451032	0.0311143	0.0323216	0.0413634
MIR570HG	0.0829386	0.211351	0.127364	0.142336	0.0920579	0.135159
MUC20	0.0049122	0.00262468	0	0.00304423	0.0163569	0.00289071
MUC4	0	0.00262833	0.00491004	0.00609692	0	0
LOC112268340	0	0	0	0	0	0
LYPLA2P1	0.8149	0.971311	0.542273	1.11362	0.556616	0.54103
MYL12BP3	0	0	0	0	0	0
DAXX	0.87624	0.853505	0.843995	0.876457	0.723311	0.769507
ZBTB22	0.426361	0.511366	0.479911	0.51159	0.566379	0.547183
TAPBP	1.19629	1.23304	1.20116	1.17294	1.31386	1.32286
RGL2	1.39281	1.0423	1.0906	1.51233	1.38864	1.40574
MIR6834	0	0	0	0	0	0
PFDN6	0.34261	0.341859	0.362649	0.323661	0.342475	0.343497
MIR6873	0	0	0	0	0	0
WDR46	2.37316	2.36428	2.50668	2.15704	1.66129	1.85024
B3GALT4	0.120639	0.082508	0.0626174	0.0418673	0.0321368	0.0795121
RING1	0.637425	0.513249	0.5703	0.499405	0.518782	0.469479
MIR219A1	0	0	0	0	0	0
HSD17B8	0.105741	0.118763	0.136781	0.104314	0.102996	0.128261
SLC39A7	0.491064	0.499015	0.473998	0.455387	0.428416	0.442187
RNY4P10	0.0372924	0.159408	0.0744485	0.231111	0	0.263348
RXRB	6.22934	5.52503	5.8506	5.64054	5.94787	6.30689
HCG24	0	0	0	0	0	0
LOC105375021	0	0	0	0	0	0
RNU1-116P	0	0	0	0	0	0
HLA-DRB2	0	0	0	0	0	0
HLA-DRB3	0	0	0	0	0	0
LOC105379657	0	0	0	0	0	0
RNA5SP206	0	0	0	0	0	0
C4A	0.235384	0.196174	0.179981	0.265455	0.207382	0.224221
ZBTB12	1.44222	1.49933	1.25181	1.59326	1.0788	1.27307
SNORD52	1.87719	2.86576	1.96299	1.55113	1.19063	0.946871
SNORD48	0.0145074	0.00430643	0.0120674	0.0139855	0.00447294	0.00948587
SNHG32	33.2398	28.2234	34.8832	36.4488	33.1433	32.2733
HSPA1B	11.5518	24.45	24.2977	10.1927	6.88031	6.52859
HSPA1A	10.6551	18.6769	18.3864	8.72886	5.10391	5.06742
HSPA1L	0.012127	0.0129593	0.0145258	0.0140288	0.0143578	0.0142729
LSM2	2.63297	2.42503	2.47689	2.93005	2.59027	2.42559
LOC105379656	0	0	0	0	0	0
DHFRP2	0	0	0	0	0	0
CCHCR1	0.732968	0.746415	0.786715	0.711821	0.691047	0.675926
POLR2LP1	0	0	0	0	0	0
PSORS1C2	0	0	0	0	0	0
CDSN	0	0	0	0	0	0.0182169
PSORS1C1	0	0	0.00054773	0	0	0
C6orf15	0	0	0	0	0	0
MUC21	0	0	0	0	0	0.0417082
NAPGP2	0	0	0	0	0	0
HCG21	0	0	0	0	0	0
MUCL3	0	0	0	0	0	0
SFTA2	0	0	0	0	0	0
VARS2	1.64805	1.73834	1.64504	1.54576	1.36055	1.49102
GTF2H4	1.088	1.13327	1.17339	1.03232	1.00219	1.00381
MIR4640	0	0	0	0	0	0
DDR1	0.0312875	0.0947323	0.0312303	0.0969486	0.0173638	0.0736478
LINC02570	0	0	0	0	0	0
RPL7P4	0	0	0	0	0	0.0194533
NRM	0.104812	0.0792852	0.0754287	0.0956079	0.0708041	0.0711509
PPP1R18	0.112843	0.100031	0.0965659	0.12466	0.0957756	0.092205
TRIM26BP	0	0	0.102028	0	0	0
MICD	0	0.0720692	0	0	0	0.0317496
HLA-W	0.00059133	0.000421277	0.000196749	0.000977235	0	0.000231989
MICF	0	0	0	0	0	0
LOC107987452	0	0	0	0	0	0
RPL23AP1	0	0	0	0	0	0
HCG4P11	0	0	0	0	0	0
OR2H2	0.305989	0.250052	0.179664	0.245403	0.199784	0.381319
RPL13AP	0	0.0363841	0	0	0	0.040072
SNORD32B	0	0	0	0	0	0
TMEM183AP1	0	0	0.00919117	0.0342387	0	0.0216748
OR2H5P	0.135609	0.144916	0	0.336162	0	0
UBD	0	0	0	0	0	0
TRV-AAC6-1	0	0	0	0	0	0
LOC112268339	0	0	0	0	0	0
LOC112268337	0	0	0	0	0	0
HLA-DQB1-AS1	0	0	0	0	0	0
LOC107987449	0	0	0	0	0	0
FKBPL	9.63609	14.5881	15.6745	9.28938	10.5966	13.2314
ATF6B	22.3442	22.5418	22.8479	18.4819	18.4935	22.0444
LOC110384692	0	0	0	0	0	0
LOC112267902	0	0	0	0	0	0
WASF5P	0	0	0	0	0	0
LOC107987448	0	0	0	0	0	0
HCG4P8	0	0	0	0	0	0
LOC107987447	0	0	0	0	0	0
HCG9P5	0	0	0	0	0	0
LOC112268336	0	0	0	0	0	0
LOC100294188	0	0	0	0	0	0
LOC112268335	0	0	0	0	0	0
HLA-S	0	0	0	0	0	0
ZDHHC20P2	0	0	0	0	0	0
RN7SKP186	0	0	0	0	0	0
TMPOP1	0.000839388	0	0	0	0	0
LOC107987443	0	0	0	0	0	0
TCF20	3.46744	3.68898	3.48877	3.48094	3.21636	3.33802
CYP2D8P	0.241211	0.0542666	0.0760325	0.062941	0.0845471	0.104592
CYP2D7	0.0802956	0.0946832	0.0248737	0.03775	0.0522453	0.0651752
LOC112268333	0	0	0	0	0	0
LOC102723722	0.0687956	0.136532	0.0686698	0.0609064	0.109086	0.0925361
CYP2D6	0.141934	0.0710982	0.0575554	0.115448	0.137848	0.0939656
LOC105373047	0	0.076881	0	0.0445852	0.0798536	0.169347
OLA1P1	5.14714	5.02624	5.23615	6.34298	5.49419	5.04828
NDUFA6-DT	0.0756187	0.145456	0.122656	0.0726376	0.0776382	0.0845496
NDUFA6	12.9565	12.1454	15.8823	13.2633	12.3044	12.4504
SMDT1	0.704039	0.696835	0.723496	0.689083	0.726661	0.703256
PHETA2	0	0.00251339	0	0.00437273	0.00261057	0.0055363
LOC112268334	0	0	0	0	0	0
MUC2	0.0297225	0	0	0	0.0164953	0
LOC107987157	0	0	0	0	0	0
LINC02688	0.00232216	0	0	0	0	0
MUC6	0.0486754	0.121371	0.145759	0.0603309	0.0900456	0.114577
AP2A2	12.9211	14.5444	13.0817	13.2239	14.9019	15.0337
RNU6-1025P	0	0	0	0	0	0
LOC105377779	0.0222849	0	0	0	0	0
MIR3674	0	0	0.0783926	0.0194684	0.0174343	0.05546
CLN8	5.24058	4.78937	6.79319	4.96712	4.02701	4.40964
CLN8-AS1	2.95454	3.01919	2.61736	3.18138	3.05394	2.95575
LOC100130321	0	0	0	0	0	0
LOC105377778	0	0	0	0.00127058	0.00113783	0.00120651
DLGAP2	0	0	0	0	0	0
DLGAP2-AS1	0	0	0	0	0	0
HLA-DPA3	0	0	0	0	0	0
LOC112267927	0	0	0	0	0	0
LOC100294160	0	0	0	0	0	0
LOC107987440	0	0	0	0	0	0
LINC01596	0	0	0	0	0	0
LOC105377619	0	0	0	0	0	0
FRG1-DT	0.0108589	0.00828874	0.00929063	0.0115364	0.00516553	0.0127804
RNU1-51P	0	0	0	0	0	0
LOC105377616	0.00066519	0.000710845	0.00132795	0.00123671	0.00221499	0.00195724
LOC107987311	0	0	0	0	0	0
LINC01262	0	0	0	0	0	0
LOC105377615	0	0	0	0	0	0
HSP90AA4P	0.00177532	0.00316196	0.00236277	0.00440087	0.00197053	0.00417894
LOC105377614	0	0	0	0	0	0
KRT18P53	0	0	0	0	0	0
FABP5P13	0	0	0	0	0	0
LOC102723840	0	0	0	0	0	0
PPP2R3B	2.83281	2.6077	2.82762	2.86234	2.90504	2.5368
LOC101929829	0	0	0	0	0	0
LOC107987438	0	0	0	0	0	0
LOC107987441	0	0	0	0	0	0
LOC105372225	0	0	0	0	0	0
SALL3	0	0	0	0	0	0
LINC01896	0	0	0	0	0	0
LOC105372221	0	0	0	0	0	0
LOC105372220	0	0	0	0	0	0
LOC105372219	0	0	0	0	0	0
WNT9B	0.287556	0.307293	0.215273	2.31668	0.478761	1.77681
LOC101929777	0	0	0	0	0	0
WNT3	3.50947	3.04716	2.81886	3.29636	3.80405	3.19467
RPS7P11	7.12336	7.11194	7.36626	8.09678	7.77049	8.6069
LOC107985026	0.0879085	0	0	0	0	0.051732
NSF	27.4686	28.2232	28.0683	28.9013	25.5203	24.9055
FAM215B	0.0490795	0.0233102	0.0217732	0.0495666	0.0262291	0.0406489
RN7SL199P	0	0.0333185	0	0.0386444	0	0
LRRC37A2	0.077123	0.0978694	0.0705668	0.0736843	0.123054	0.105898
ARL17A	0.146602	0.202358	0.173772	0.295274	0.220352	0.111435
RDM1P2	0.0702234	0.0750431	0.0525712	0.0217597	0.136403	0.0413248
LOC100132570	0.0249483	0.00888686	0.0166017	0.0206148	0	0
DND1P2	0.0198315	0.0211926	0.0395904	0	0.0660359	0
MAPK8IP1P1	0	0.0641105	0	0.0743584	0	0
KANSL1-AS1	0.00218804	0.00155881	0.00145603	0.00542396	0.000809541	0.000858407
LOC107985027	0	0	0	0.0653752	0.0585446	0
KANSL1	0.608381	0.656095	0.632004	0.613537	0.612697	0.71166
STH	0	0	0	0	0	0
LOC105371800	0	0	0	0	0	0
MAPT-IT1	0	0	0	0	0	0
MAPT	0	0.0992423	0	0.115106	0	0
SPPL2C	0	0	0	0	0	0
MAPT-AS1	0	0	0	0	0	0
CRHR1	0	0	0	0	0	0
LOC107985028	0	0	0	0	0	0
LOC105371802	0	0	0	0	0	0
ARF2P	0.382725	0.102248	0.148565	0.250362	0.118002	0.387887
LINC02210-CRHR1	0	0	0	0	0	0
LINC02210	0.316789	0.400083	0.388075	0.28556	0.415552	0.491478
RPS26P8	2.10301	2.92579	2.73287	3.93446	1.01297	3.12895
MAPK8IP1P2	0.19774	0.147918	0.0986889	0.147053	0.131689	0.139638
LOC105376839	0.104911	0	0	0.130032	0.174669	0.123475
DND1P1	0.864156	0.307822	0.616125	1.22409	1.05052	0.920206
RDM1P1	0.124633	0.310769	0.207341	0.0514922	0.0461121	0
LOC102724345	0.167783	0.358598	0.209345	0.311939	0.931157	0.345577
LRRC37A4P	8.32142	9.29074	6.90117	11.0324	9.92567	12.4738
LOC112267925	0	0	0	0	0	0
LRRC37A3	0.0709113	0.0791462	0.0692087	0.0507816	0.0629665	0.0612034
LOC105369225	0.0113729	0	0.00454084	0.00845771	0.0126234	0.00267707
MIR4315-1	0	0	0	0	0	0
PLEKHM1	12.6996	12.1476	14.7595	12.2182	14.4902	12.595
ARHGAP27	0.995131	0.658773	0.690132	1.3362	0.865008	0.792574
LOC105371796	0	0	0	0	0	0
RNA5SP443	0	0.00326301	0	0	0	0
KRTAP9-12P	0	0	0	0	0	0
KRTAP9-2	0	0	0	0	0	0
KRTAP9-4	0	0	0	0	0	0
KRTAP9-9	0	0	0	0	0	0
KRTAP9-6	0	0	0	0	0	0
KRTAP9-11P	0	0	0	0	0	0
KRTAP9-7	0	0	0	0	0	0
KRTAP9-10P	0	0	0	0	0	0
KRTAP29-1	0	0	0	0	0	0
LOC102724956	0	0	0.00308036	0	0	0
TBC1D3I	0.419131	0.248832	1.02267	0.577215	0.465215	0.76735
LOC105371747	0	0	0	0	0	0
CCL4L1	0	0	0	0	0	0
CCL3L1	0	0	0	0	0	0
LOC107987437	0	0	0	0	0	0
LOC105379634	0	0	0	0	0	0
CCL3P1	0	0	0	0	0	0
TBC1D3G	0.0082397	0.0056605	0.00998704	0.00875377	0.0137185	0.0145466
LOC100420853	0	0	0	0	0.00649817	0
YWHAEP6	0	0	0	0	0	0
LOC105379635	0	0	0	0	0	0
CCL4L2	0	0	0	0	0	0
CCL3L3	0	0	0	0	0	0
TBC1D3B	0	0	0	0	0	0
LOC100420851	0.0324135	0.00577304	0.0323542	0.0334792	0.0359775	0.101731
LOC107985056	0	0	0	0	0	0
LOC100419980	0	0.00144183	0	0	0	0
LOC107985055	0	0	0.000588707	0	0	0
RN7SL301P	0	0	0	0	0	0
CCL4	0.411503	0.586328	0.718813	0.722555	0.79931	0.645759
LOC101927369	0.103545	0.073768	0.0689039	0.0427798	0.15324	0.16249
CCL3	0.033404	0.0356967	0.0333429	0	0.0741537	0.117945
CCL3-AS1	0	0	0	0	0	0
CCL18	0	0	0	0	0	0
LOC105379599	0.0675645	0	0	0	0	0
MIR3183	0	0	0	0	0	0
LOC105371481	0.00120089	0	0.0011987	0	0	0.000706697
LOC112268190	0.00147897	0.00158048	0.00118101	0.00109987	0.000328317	0
ABR	0.335517	0.343606	0.341881	0.346549	0.294823	0.279712
TIMM22	0.219257	0.192561	0.203133	0.208504	0.184621	0.198732
NXN	0.120912	0.113408	0.108535	0.189758	0.113931	0.125927
RPH3AL-AS1	0	0	0	0	0	0
RPH3AL	0	0	0.00422815	0	0	0
LOC107984761	0	0	0	0	0	0
LOC107984089	0	0	0	0	0.00565784	0
FMN1	1.25253	1.1989	1.2349	1.00957	1.56083	1.32042
GREM1-AS1	0	0	0	0	0	0
GREM1	0	0	0	0	0	0
LOC105370756	0.00764973	0.00817477	0.00763574	0	0	0
SCG5-AS1	0	0	0	0	0	0
LOC105379633	0	0	0	0	0	0
SCG5	0	0	0	0.050097	0.0897254	0
ARHGAP11A-SCG5	0.00401331	0.00857753	0	0.00497432	0	0
ARHGAP11A	5.98092	5.5789	5.61167	6.94013	6.23383	5.91484
RN7SL286P	0.00862877	0	0	0.010695	0	0.00507782
GOLGA8N	13.2721	10.5245	9.63478	21.5348	15.3843	13.2243
LOC101928042	0.0532834	0.0569405	0.030392	0.0566077	0.0506932	0.0179177
LINC02256	0.149572	0.155398	0.223948	0.247184	0.221357	0.12225
WHAMMP1	0.143595	0.127876	0.129	0.143373	0.164697	0.13896
LOC107984723	0	0	0	0	0	0
LOC101060588	0	0	0	0	0	0
RNU6-18P	0	0	0	0	0	0
LOC107984069	0	0	0	0	0	0
LOC105370754	0.485846	0.259596	0	0	0.269633	0
CHRNA7	0.342812	0.32407	0.329024	0.435794	0.482948	0.351746
DEPDC1P1	0.0549197	0.019563	0.0548192	0.0567253	0.0812776	0.0430919
LOC105370753	0	0	0.00217398	0.00539896	0	0
OTUD7A	0.212941	0.0568891	0.194839	0.351908	0.118177	0.250622
LOC400347	0.00814162	0.0174008	0.00812673	0.0201823	0	0.0191646
UBE2CP4	0	0	0	0	0	0
LOC105370939	0	0	0	0	0	0
LOC105376707	0.00542806	0.00580061	0	0	0.00602488	0
KLF13	3.59413	3.66531	3.452	3.02986	3.14448	3.02948
LOC283710	0	0	0	0	0	0
LOC107984092	0	0	0	0	0	0
LINC02352	0.0651219	0	0	0	0	0.0766453
LOC107984779	0	0	0	0	0	0
MIR211	0	0	0	0	0	0
LOC105370752	0	0	0	0	0	0
TRPM1	0.116853	0.0624364	0	0	0.194551	0
RNU6-466P	0	0	0	0	0	0
MTMR10	10.9478	11.311	10.5134	8.16728	10.9421	9.34315
FAN1	7.00044	8.13489	7.71768	10.3603	10.3878	10.4
LOC388104	0.0349374	0.0253881	0.023714	0.0190535	0.0263697	0.0296062
LOC100629121	0	0	0	0	0.0666171	0.0235461
HERC2P10	1.27422	1.78066	2.05459	1.70083	1.52312	1.67274
RN7SL82P	0	0	0.0203533	0.0252732	0	0
LOC107987436	0	0	0	0	0	0
LOC101930434	0.677617	0.402292	0.901836	1.21315	0.334277	0.443068
LOC107984025	0	0	0	0	0	0
LOC100288637	0.544404	0.613171	0.65456	0.605754	0.557913	0.531521
ARHGAP11B	1.39142	1.72969	1.65106	1.65421	1.48926	1.6627
RN7SL628P	0	0	0	0	0	0
GOLGA8H	9.63978	7.75708	8.69471	13.8914	9.99068	7.72318
ARHGAP11B-DT	0.0188524	0.0318984	0.0203861	0.0194723	0.0122064	0.0314336
ULK4P1	0.223675	0.1608	0.180643	0.224308	0.225699	0.205818
DNM1P29	0.000377941	0.000403881	0	0	0.000419497	0
RN7SL196P	0	0	0	0	0	0
LOC100288482	0.00106982	0.00114325	0.00213573	0.0106079	0.0023749	0.00377738
GOLGA8R	1.0548	0.889751	0.797941	1.69358	1.14243	0.997972
LOC105376704	0.00129436	0.00230533	0.00129199	0.0016043	0.00191557	0.0045702
MPHOSPH10P3	0.00332968	0.00118607	0.00332359	0	0.00246386	0.00130629
LOC105370750	0	0	0	0	0	0
LOC101929944	0	0	0	0	0	0
GOLGA8Q	1.18081	1.11201	1.14182	2.0124	1.23283	1.42885
DNM1P50	0.00871064	0.0279255	0	0.0107964	0.0193368	0
ULK4P2	0.545864	0.314691	0.451664	0.427309	0.454412	0.456481
LOC105370751	0.041653	0	0	0.0413016	0.00924657	0.0392189
CHRFAM7A	0.706412	0.621217	0.69043	0.738758	0.939267	0.753468
LOC102724055	0.00482631	0.00114612	0	0.00664665	0.00178566	0.00252459
RNU6-17P	0	0	0	0	0	0
LOC728424	0.117219	0.139183	0.182008	0.20986	0.0722822	0.183949
LINC02249	0	0.0251449	0.00782895	0.00972141	0.0348228	0.0646183
LOC105370747	0	0	0	0	0	0
LOC105370746	0	0	0	0	0	0
DNM1P30	0	0	0	0	0	0
RN7SL469P	0	0	0	0	0	0
LOC101929922	0	0	0	0	0	0
GOLGA8T	9.43521	6.92073	7.85758	16.4	8.92343	10.7105
ULK4P3	0.980842	0.483767	0.502076	0.716957	0.390811	1.1544
DNM1P28	0	0	0.047222	0.17591	0	0.0556799
RN7SL673P	0	0	0	0	0	0
GOLGA8J	0.712692	0.513443	0.407649	1.21088	0.71106	0.650309
SYNGR2P1	0.00787695	0.0252528	0.0117938	0.0146447	0.00874304	0.0046354
NCAPGP2	0	0	0	0	0	0
HMGN2P5	17.8232	16.4692	16.0805	15.2924	12.7968	13.1366
TJP1	0.476946	1.01936	0.793456	0.640415	0.838196	0.514564
LOC105370743	0	0	0	0	0	0
LOC100130111	0	0	0	0	0	0
TUBBP8	0	0	0	0	0	0
NSMCE3	7.52392	6.33365	6.83708	7.21411	6.61793	7.39334
LOC100420707	0	0	0	0	0	0.0416773
FAM189A1	0.0359445	0	0.107636	0	0	0
APBA2	43.9989	40.6089	40.4767	45.9872	42.179	39.3986
PDCD6IPP2	3.02058	3.32571	2.96937	3.00644	3.3527	2.53165
LOC100289656	0	0	0.0355575	0	0	0
LOC100996670	0	0	0	0	0	0
WHAMMP2	0.00492513	0.00526316	0.0196645	0.0122089	0.0273333	0.0115933
RN7SL719P	0	0	0	0	0.00369502	0
LOC107984746	0	0	0	0	0	0
GOLGA8M	1.04119	0.898676	0.999308	1.73721	1.28901	1.55535
LOC100419574	1.02508	1.05892	0.750347	0.719969	0.606818	0.924956
HERC2P9	2.65834	3.3214	2.95127	2.08069	2.93086	3.00296
HERC2P11	0.01214	0.0648659	0.0242355	0.0601877	0.0404243	0
LOC105369220	0	0	0	0	0	0
LOC100132202	0	0	0	0	0	0
MPHOSPH10P8	0	0	0	0	0	0
GOLGA8G	0	0	0	0.0115196	0.010316	0
ABCB10P4	0.126186	0.15411	0.179936	0.0670293	0.240103	0.297029
MIR4509-3	0	0	0	0	0	0
LOC101059997	0	0	0	0	0	0
MIR4509-2	0	0	0	0	0	0
ABCB10P3	0.0347257	0.0762798	0.0751014	0.0573879	0.0556745	0.0681175
GOLGA8F	0	0	0	0.0175354	0.00523442	0.0111008
MPHOSPH10P7	0	0	0	0	0	0
GOLGA6L22	0	0	0	0	0	0
LOC101060587	0	0	0	0	0	0
HERC2P1	0	0.00280602	0	0.00325455	0	0.00309043
RPL41P2	0.0234618	0.0195005	0.0156126	0.0323109	0.028935	0.0337497
HERC2	29.1594	37.3839	36.2802	27.9385	29.6908	34.0434
RPL5P32	0	0	0	0	0	0
OCA2	0	0	0	0	0	0
LOC100421667	0	0	0	0	0	0
MIR4509-1	0	0	0	0	0	0
ABCB10P1	0.0910961	0.413731	0.181859	0.225819	0.202225	0.321647
RN7SL106P	0	0	0	0	0	0
GOLGA8DP	0	0	0	0.0233299	0	0
MPHOSPH10P5	0	0	0	0	0	0
GOLGA6L1	0	0	0	0	0	0
LOC101060118	0	0	0	0	0	0
ELMO2P1	0	0	0	0	0	0
TUBGCP5	30.4757	22.8789	19.9529	25.4529	26.3096	29.3118
PRB1	0	0	0	0.0254581	0	0
PRB4	0	0	0	0	0	0
PRB3	0	0	0	0	0.00279136	0.0118394
LOC100420583	0	0	0	0	0	0
LOC107987435	0	0	0	0	0	0
TAS2R42	0	0	0	0	0	0
TAS2R67P	0.00745849	0.0039852	0	0	0.0124179	0
SMIM10L1	2.23846	1.91279	1.99393	2.28031	1.8208	2.23864
TAS2R30	0.00624468	0	0	0	0	0.00734969
TAS2R45	0	0	0	0	0	0
TAS2R68P	0	0	0	0	0	0
TAS2R46	0	0	0.0262663	0	0	0
TAS2R63P	0	0	0	0	0	0
TAS2R31	0.169571	0.0906049	0.0846306	0.210176	0.47054	0.0997886
TAS2R19	0.117863	0.125952	0	0.146085	0	0
TAS2R20	0.176794	0.132949	0.0849672	0.121738	0.123554	0.208078
TAS2R50	0.00970605	0	0	0	0.0107732	0
TAS2R15P	0	0.0324443	0	0	0.00842468	0
TAS2R14	0.101204	0.0720997	0.0673456	0.250874	0.262106	0.0794078
PRH1-TAS2R14	0	0	0.0692041	0	0	0.0815991
PRH2	0.0986247	0.210787	0.0196888	0.0977926	0	0.0696459
TAS2R13	0	0	0.0189715	0	0	0
TAS2R12P	0.00697768	0.0298264	0.00348246	0	0.0077449	0.0287434
PRH1	0.0021253	0	0	0.00263422	0.00235899	0.00500276
PRR4	0	0.00389364	0	0.00225802	0	0
PRH1-PRR4	0	0.0086043	0	0	0	0.0142146
LOC100420580	0	0	0	0	0	0
TAS2R10	0.000912197	0.000731104	0	0.000565313	0	0.000268403
LOC107984459	0.0120734	0.0200699	0.0160685	0.0149645	0.0312689	0.0173676
TAS2R9	0	0	0	0	0	0
TAS2R8	0	0	0	0	0	0
TAS2R7	0	0	0	0	0	0
IFITM10	0.854306	0.532549	0.521121	0.500023	0.698009	0.684283
KRTAP5-6	0	0	0	0	0	0
LINC02708	0	0	0	0	0	0
FAM99B	0	0	0	0	0	0
FAM99A	0	0	0	0	0	0
KRTAP5-5	0	0	0	0	0	0
KRTAP5-4	0	0	0	0	0	0
KRTAP5-3	0	0	0	0	0	0
KRTAP5-2	0	0	0	0	0	0
KRTAP5-1	0	0.0159358	0	0	0	0
KRTAP5-AS1	0	0	0	0	0	0
DUSP8	0.0563459	0.0702487	0.121859	0.0698381	0.125082	0.0884218
LOC105379626	0	0	0	0	0	0
LOC105379586	0	0	0	0	0	0
LOC105377775	0	0	0	0	0	0
LOC105379627	0	0	0	0	0	0
FAM20C	0	0.030683	0	0.0355877	0.0159347	0.0675862
LOC105375116	0	0	0	0	0	0
LOC105375115	0	0	0	0	0	0
LOC100507642	0	0	0	0	0	0
LOC102723672	0.293106	0.134238	0.334365	0.155696	0.185905	0.394253
LOC105375114	0	0	0	0.0110505	0.00989594	0
LOC101929756	0	0	0	0	0	0
LOC105375113	0	0	0	0	0	0
LOC107986751	0	0	0	0	0	0
LOC105375112	0	0	0	0	0	0
LOC102723872	0.0230638	0.098587	0.145803	0.057173	0.0853323	0.0995315
RNU1-79P	0	0	0	0	0	0
LOC107987429	0	0	0	0	0	0
LOC112267926	0	0	0	0	0	0
LOC107987427	0	0	0	0	0	0
LOC105375006	0	0	0	0	0	0
TRA-CGC2-1	0	0	0	0	0	0
TRA-AGC4-1	0	0	0	0	0	0
LINC00533	0	0	0	0	0	0
TRT-CGT3-1	0	0	0	0	0	0
TRA-TGC2-1	0	0	0	0	0	0
LOC105374996	0	0	0	0	0	0
TRA-TGC9-1	0	0	0	0	0	0
TRA-AGC3-1	0	0	0	0	0	0
TRS-GCT4-1	0	0	0	0	0	0
TRQ-TTG2-1	0	0	0	0	0	0
ZBED9	0	0	0	0	0	0
TRR-TCG5-1	0	0	0	0	0	0
LOC107986586	0	0	0	0	0	0
TRI-TAT3-1	0	0	0	0	0	0
GPX5	0	0	0	0	0	0
GPX6	0	0	0	0	0	0
PROP1	0	0	0	0	0.0212612	0
SUDS3P1	0.824783	0.975827	0.705664	0.894496	1.04625	1.26542
LOC100128340	0.002995	0	0.00298952	0	0.00332431	0.0105749
LOC728554	0.673942	0.754493	0.589421	0.668256	0.427453	0.694992
MCCC2	3.81856	4.11054	3.70453	3.87187	3.25515	3.6876
HMGN1P12	0	0	0	0	0	0.00329546
LOC100419852	0	0	0	0.0214831	0	0
BDP1	0.240882	0.278968	0.266901	0.27142	0.248178	0.281471
LOC107987434	0	0	0	0	0	0
PMCHL2	0	0	0	0	0	0
LINC02197	0	0	0	0	0	0
LOC107986421	0.00833496	0.0356281	0	0	0.00925141	0.00980985
LOC441081	0	0	0	0	0.0229462	0.0243313
GUSBP17	0.0225311	0.009631	0.0134939	0.0279262	0.0150051	0.026518
LOC107987433	0	0	0	0	0	0
GUSBP9	0.491717	0.202102	0.377552	0.703223	0.335866	0.667762
CDH12P4	0.00127883	0	0	0.00158505	0	0.000752562
NAIPP4	0.0194748	0.0329514	0.0307787	0.0221266	0.0270201	0.0382015
GTF2H2	6.37064	6.56475	4.86009	7.72692	5.00029	4.98078
NAIPP1	0.0137801	0	0	0.0341596	0.0458858	0
NAIP	0.485105	0.746496	0.60043	0.721518	0.732283	0.822161
SMN1	5.88249	6.20615	8.3775	7.19819	6.19658	5.24768
SERF1A	0.32166	0.137495	0.107024	0.23921	0.119009	0.227147
CDH12P3	0.00198331	0.00211944	0.00395937	0.00491645	0.00220138	0
NAIPP2	0.169599	0.148287	0.230848	0.15288	0.176838	0.145171
SMN2	19.9567	20.606	19.2472	19.7215	18.8882	16.5686
SERF1B	0.459912	0.430802	0.425066	0.316689	0.352925	0.280671
CDH12P2	0	0	0	0	0	0
LOC105369228	0.00446449	0.0127224	0.00891265	0.0110671	0.0165179	0.014012
LOC105379023	0	0	0	0	0	0
LOC112268330	0	0	0	0	0	0
GUSBP1	0.172301	0.172343	0.178865	0.22381	0.128517	0.155743
LOC728452	0	0	0	0	0	0
LOC728506	0.00471171	0.0050351	0	0.0116799	0	0
GUSBP15	0.0835685	0.178608	0.150148	0.24859	0.0927571	0.177041
GUSBP3	0.017687	0.00945048	0.0353093	0.0182685	0.0327196	0.00693892
LOC105379623	0.00189731	0.00202753	0.000946918	0	0	0.00223304
RARRES2P4	0.221505	0.177531	0.2211	0.274545	0.36879	0.325876
FRG2	0	0.00348266	0	0	0	0
DUX4L9	0	0	0.00216676	0	0	0.0102194
RNA5SP175	0.00224326	0.00239723	0	0	0	0
RNA5SP174	0	0.000920768	0	0.0021359	0	0.00405639
TUBB7P	0	0	0	0	0	0
MLLT10P2	0	0	0	0	0	0
FRG1	1.14272	1.24002	1.42098	1.12393	1.22739	1.24293
LINC01881	0.0745778	0.135242	0.121813	0.033613	0.120404	0.095754
LINC01880	0	0	0	0	0	0
LOC105373980	0	0	0	0	0	0
LOC285097	0.094758	0.0759463	0.0236462	0.0880861	0.0262942	0
LINC01238	0.414965	0.228875	0.347398	0.199095	0.13372	0.267829
LINC01237	0.0534689	0	0.0133428	0.0497042	0.014837	0.110128
LOC101926946	0	0	0	0	0	0
LOC105374866	0	0	0	0	0	0
LOC112268329	0	0	0	0	0	0
OR2G6	0	0	0	0	0	0
OR2AS2P	0	0	0	0	0	0
OR2T5	0	0	0	0	0	0
LOC105373277	0	0	0	0	0	0
OR2T3	0	0	0	0	0	0
LOC105373279	0	0	0	0	0	0
OR2T2	0	0	0	0	0	0
OR2T7	0	0	0	0	0	0
OR2T1	0	0	0	0	0	0
OR2T6	0	0	0	0	0	0
OR2T4	0	0	0	0	0	0
TBX22	0	0.000916385	0	0	0	0
LINC00685	4.00275	5.10744	5.367	3.70241	4.24393	5.13293
APOBEC3A_B	0	0	0	0	0	0
LOC105373032	0	0	0	0	0	0
NCF4	15.9187	12.0747	13.7681	14.1662	17.8375	15.7746
NCF4-AS1	0.152995	0.163495	0	0	0.169817	0.720269
PVALB	0	0	0	0	0	0
NDUFA9P1	0.272249	0	0.0905837	0	0	0.106808
RPL41P3	0	0	0	0	0	0
RBFOX2	0.241326	0.164112	0.16643	0.201221	0.0876635	0.129104
APOL5	0	0	0	0	0	0
MRPS16P3	0	0	0	0	0	0
CABIN1	2.27687	2.47918	2.37099	2.1852	2.56649	2.64356
GSTTP2	0	0	0	0	0	0
GSTT1	0	0	0	0	0	0
GSTT1-AS1	0	0	0	0	0	0
LOC391322	0	0	0	0	0	0
LOC100420769	0	0	0	0	0	0
EIF4EBP1P2	0	0	0	0	0	0
MTND1P13	0	0	0	0	0	0
GSTT4	0	0	0	0	0	0
GSTT2	0.00998835	0.0106739	0.0299102	0.0680906	0.0221732	0.0117558
DDT	5.57934	6.11918	6.36705	7.11754	5.59525	5.97139
DDTL	2.36925	1.86624	2.38816	2.19342	2.09993	2.11706
GSTT2B	0.114121	0.0203256	0.0506277	0.0157164	0.0351858	0.0447717
LOC100652871	0	0	0	0	0	0
LOC100129358	0.145193	0.11865	0.0852514	0.105859	0.00947984	0.120625
LOC107985558	0.656894	0.935974	1.31139	0.949889	0.729122	1.09527
MIF	0	0	0	0	0	0
MIF-AS1	0.00267239	0.00836342	0.00476339	0.00473186	0.00317809	0.00426858
RN7SL268P	0	0	0.000295382	7.33566e-05	0.000262768	0
SLC2A11	0.788405	0.957406	0.947932	0.79952	0.616542	0.759203
DERL3	0	0	0.00363982	0.00451965	0.00101186	0
SMARCB1	45.0541	42.8191	42.6175	43.5512	39.8636	47.1592
MMP11	0.0012595	0.0023554	0.00377158	0.000780545	0.00349496	0.00370592
LOC107985577	0.0153932	0	0	0.0190792	0	0
CHCHD10	1.12905	1.32037	1.36089	1.25088	1.14088	0.980958
C22orf15	0	0.00521794	0.00243694	0	0.00541968	0
LINC02557	0	0	0	0	0	0
LOC648771	0	0	0	0	0	0
FAM230I	0	0	0	0	0	0
LINC01659	0.00328749	0	0.00328147	0	0	0
LOC107985555	0	0	0	0	0	0
ZDHHC8P1	0.00752907	0.0160917	0.0075153	0.0186639	0	0
CES5AP1	0	0	0	0	0	0
LL22NC03-63E9.3	0	0	0	0	0	0
PRAME	0	0	0	0	0	0
LOC105379601	0	0	0	0	0	0
ZNF280A	0	0	0	0	0	0
LOC105379602	0	0	0	0	0	0
ZNF280B	0	0	0	0	0	0
LOC100736412	0	0	0	0	0	0
LOC105379603	0	0	0	0	0	0
LOC105379604	0	0	0	0	0	0
LOC102725003	0	0	0	0	0	0
LOC105379605	0	0	0	0	0	0
IGLV5-39	0	0	0	0	0	0
IGLV7-43	0	0	0	0	0	0
LOC102724999	0	0	0	0	0	0
IGLV5-45	0	0	0	0	0	0
SNORD159	0.143514	0.076682	0.159168	0.276701	0.141594	0.206444
LSS	0.838286	0.728767	0.72158	0.869863	0.857013	0.842547
SPATC1L	3.28336	3.33974	3.50946	2.60545	3.85086	3.26226
FTCD-AS1	0	0	0	0	0	0
FTCD	0.0780954	0.0641965	0.0719562	0.0521208	0.0800144	0.0494925
GART	42.4373	43.9966	42.0679	46.2147	47.4953	48.0262
DNAJC28	0.123579	0.0352161	0.0575646	0.0510567	0.100589	0.0484821
RPS5P3	0	0.0196497	0	0	0.0204094	0
TMEM50B	8.23505	9.15404	10.4092	8.92469	9.09458	8.74251
IFNGR2	2.23834	2.37639	2.07414	2.74721	2.39544	2.81463
C21orf62	0.0367659	0.0130964	0	0	0.0136028	0.0144239
C21orf62-AS1	0.252118	0	0.419428	0.312489	0.0932796	0.494551
PAXBP1	32.6947	35.7773	32.3739	34.6342	35.5638	29.1936
RNU4-45P	0	0	0	0	0	0
LOC100420035	0	0	0	0	0	0
LOC105379618	0	0	0	0	0	0
LINC00308	0	0	0	0	0	0
LOC100134423	0	0	0	0	0	0
BTG3-AS1	0.0585123	0.0750339	0.0700863	0.0290093	0.0649459	0.0137732
BTG3	0.443903	0.432204	0.236315	0.476837	0.284677	0.325081
LOC107987418	0	0	0	0	0	0
NEK4P1	0	0	0	0	0	0
LOC107985511	0	0	0	0	0	0
PCMTD2	1.12417	1.28254	1.09366	1.12646	1.49381	1.47217
MYT1	0.0153618	0.0164162	0.0460012	0.0507741	0.102305	0.084374
LOC105372727	0	0	0	0	0	0
NPBWR2	0	0	0	0	0	0
OPRL1	1.72881	1.53955	1.15043	1.07139	1.17266	1.92168
KCNQ2-AS1	0	0	0	0	0.00490843	0
LOC105372721	0	0	0	0	0	0
KCNQ2	0	0.0230608	0	0	0.0319366	0
LOC105372704	0.123728	0.0925542	0.135852	0.291375	0.178532	0.0436866
TAF4	13.2636	13.7792	13.7926	12.9823	12.6511	14.3714
MIR1257	0	0	0	0	0	0
CDH4	0.00271318	0.0072485	0.0058678	0.00336286	0.00401533	0.00638656
LOC107985440	0	0	0	0	0	0
LOC107987425	0	0	0	0	0	0
PCAT19	0	0	0	0	0	0
TPM3P5	29.1516	25.8466	26.5768	24.328	25.7824	23.7847
PLEKHA3P1	0.0969334	0.218682	0.16126	0.21359	0.0836823	0.126762
LINC01480	0.000961055	0.000342339	0.000639531	0	0.000355575	0
LOC110467527	0	0	0	0	0	0
CEACAM21	0.000367736	0	0.000367063	0.00136738	0.000816339	0
CEACAMP3	0	0	0	0	0	0
DNAJC19P2	0	0	0	0	0	0
LOC105372404	0	0	0	0	0	0
CEACAM4	0	0	0	0	0	0
DNAJC19P3	0	0	0	0	0	0
LOC105372405	0	0	0	0	0	0
CEACAM7	0	0	0	0	0	0
GPI	8.24249	7.75537	8.08868	9.47914	7.75254	7.68006
GARRE1	3.57313	5.33157	4.38559	4.42873	5.288	4.9686
RPL29P33	0.00642411	0.00686502	0.0224432	0.00398119	0.00356523	0
LSM14A	35.3543	37.401	36.1723	34.9228	38.3851	38.2431
ZNF92P2	0	0	0	0	0	0
PCGF7P	0.518208	0.52213	0.532039	0.587241	0.525884	0.566341
MTDHP5	0	0	0	0	0	0
VN1R85P	0.00038035	0	0	0.000942853	0.000844341	0
ZNF676	0.741852	0.300705	0.408549	0.697545	0.198757	0.301077
BNIP3P30	0.0551523	0	0	0.0341794	0	0
LOC105372328	0	0	0	0	0	0
LOC107985324	0	0	0	0	0	0
BNIP3P31	0	0	0	0	0	0
ZNF43	27.2385	15.7835	18.2148	26.1332	19.1261	19.0209
BRI3BPP1	0	0	0.0058991	0.0219752	0	0
CCNYL6	0.0196034	0	0.0260901	0.00809918	0.00725296	0.0153815
ZNF100	0.941293	0.928351	0.794703	1.07675	0.95504	0.876036
VN1R84P	0.0384489	0	0	0.0476557	0.0426765	0.0226263
MTDHP4	0	0	0	0	0	0
MTDHP3	0	0	0	0	0	0
LOC400682	0.027334	0.0438151	0.040926	0.180689	0.096075	0.101874
ZNF430	14.423	16.5104	15.7338	17.8766	17.4462	16.5547
LOC112268247	0	0	0	0	0	0
KRT18P40	0	0	0	0	0	0
ZNF85	4.44184	3.10718	3.0505	3.43516	3.03505	3.02894
LOC100418993	0	0	0	0	0	0
LOC100418992	0	0	0	0	0	0
LOC100418991	0	0	0	0	0	0
LOC100418990	0	0	0	0	0	0
LOC100418989	0	0	0	0	0	0
LOC100418988	0	0	0	0	0	0
LOC100418987	0	0	0	0	0	0
LOC100418986	0	0	0	0	0	0
BNIP3P24	0	0	0	0	0.231366	0.122666
ZNF66	0.219768	0.187085	0.23052	0.267775	0.293545	0.170976
VN1R79P	0	0	0	0	0	0
LOC100533638	0	0	0	0	0.0155512	0
LOC105372319	0	0	0	0.124732	0	0
SBNO2	2.14675	2.11763	2.12737	2.18749	1.86156	2.50233
MED16	5.67951	6.4808	6.32371	5.79416	6.14371	6.19591
CFD	1.11659	1.55783	1.05263	0.499765	1.37707	1.05864
ELANE	0	0	0.0101528	0	0.0112898	0.0119712
PRTN3	0	0.00256683	0.00479515	0	0	0
AZU1	0.251454	0.223927	0.209162	0.0519443	0.325619	0.838522
CTDP1	5.64441	5.50092	5.54967	4.54608	4.81022	5.33695
CTDP1-DT	0	0.0388504	0.0725773	0.0450606	0	0.0427883
LOC284240	0.00188108	0.00201019	0.00375528	0.00233151	0	0.00442788
DSEL	0.00561222	0.00171355	0.000800279	0.000993727	0.0017798	0
LOC100422053	0	0	0	0	0	0
RPLP0P11	0	0	0	0	0	0
LOC105372115	0	0.0058999	0.0165326	0.027372	0.0245121	0
SKA1	0.53989	0.54675	0.533866	0.522827	0.622774	0.669868
LOC105372114	0	0	0	0	0	0
RNA5SP458	0	0	0	0	0	0
TBCD	1.76831	1.76415	1.697	1.47003	1.47206	1.50591
B3GNTL1	0.0533023	0.0486406	0.0508136	0.0720043	0.0664753	0.0514562
METRNL	0.187085	0.167623	0.171248	0.264286	0.196773	0.225959
SEPTIN9	1.4187	1.2026	1.17593	1.55401	1.26485	1.30063
LOC107984143	0	0	0	0	0	0
SEPTIN9-DT	0	0	0	0	0	0
LACAT1	0	0	0	0	0	0
MYL6P5	0	0	0.00372611	0	0.00138113	0.0014645
RDM1P4	0	0.00152143	0	0	0	0
LOC107984156	0	0	0	0	0	0
LOC100294336	0	0	0	0	0	0
LOC101929775	0	0	0	0	0	0
LOC107984142	0	0	0	0	0	0
LOC112268319	0	0	0	0	0	0
LOC100996747	0	0	0	0	0	0
LOC100996745	0	0	0	0	0	0
LOC105371801	0	0	0	0	0	0
LOC105371799	0	0	0	0	0	0
RN7SL656P	0	0	0	0	0	0
LRRC37A	1.78208	1.54165	1.69412	1.52513	1.50707	1.89767
LOC107987254	0.269685	0.504342	0.471086	0.167131	0.82318	0.714165
LOC100996709	0	0	0	0	0	0
NSFP1	1.89576	1.76615	1.84377	2.53046	1.24094	1.88796
LOC101929774	0	0	0	0	0	0
KRTAP16-1	0	0	0	0	0	0
KRTAP17-1	0	0	0	0	0	0
TBC1D3P7	0	0	0	0	0	0
KRT33A	0	0	0	0	0	0
LOC105371778	0	0	0	0	0	0
KRT33B	0	0	0	0	0	0
KRT34	0	0	0	0	0	0
LOC100653049	0	0	0	0	0	0
KRT31	0	0	0	0	0	0
KRT41P	0	0	0	0	0	0
LOC100505782	0	0	0	0	0	0
KRT37	0	0	0	0	0	0
KRTAP9-3	0	0	0	0	0	0
KRTAP9-8	0	0	0	0	0	0
KRTAP4-12	0	0	0	0	0	0
KRTAP4-11	0	0	0	0	0	0
KRTAP4-9	0	0	0	0	0	0
KRTAP4-16	0	0	0	0	0	0
KRTAP4-8	0	0	0	0	0	0
LOC100996750	0	0	0	0	0	0
KRTAP2-5P	0	0	0	0	0	0
KRTAP2-4	0	0	0	0	0	0
KRTAP2-3	0	0	0	0	0	0
KRTAP2-2	0	0	0	0	0	0
KRTAP2-1	0	0	0	0	0	0
KRTAP1-1	0	0	0	0	0	0
KRTAP1-3	0	0	0	0	0	0
KRTAP1-4	0	0	0	0	0	0
KRTAP1-5	0	0	0	0	0	0
KRTAP3-1	0	0	0	0	0	0
KRTAP3-4P	0	0	0	0	0	0
KRTAP3-2	0	0	0	0	0	0
KRTAP3-3	0	0	0	0	0	0
KRT40	0	0	0	0	0	0
KRT39	0	0	0	0	0	0
LOC107985072	0	0	0	0	0	0
KRT23	0	0	0	0	0.00161968	0
KRT20	0	0	0	0	0	0
KRT12	0	0	0	0	0	0
LOC105371777	0	0	0	0	0	0
C17orf98	0	0	0	0	0	0
MIR4727	0	0	0.0146787	0	0	0
CWC25	0.435566	0.495171	0.431069	0.422702	0.438198	0.392661
PIP4K2B	6.64341	6.16596	6.07759	6.8908	6.1496	5.63536
RNU6-866P	0	0	0	0	0	0
PSMB3	30.7197	31.4135	32.6456	31.4643	28.0472	30.9316
TRN-GTT2-5	0	0	0	0	0	0
LOC100287808	0.0835978	0	0.417224	0.103616	0.0927896	0
PCGF2	0.356824	0.349241	0.296254	0.454667	0.366446	0.333616
RNA5SP440	0	0	0.00319093	0	0	0
CISD3	0.137444	0.155517	0.17028	0.141295	0.125635	0.117042
MIR4726	0	0	0	0	0	0
LOC105371762	0.107475	0.0820369	0.183906	0.171271	0.153376	0.180704
MLLT6	8.83517	8.98907	8.60767	8.48812	9.18297	9.89062
MIR4734	0	0	0	0	0	0
LOC105371763	0.0464383	0.0248128	0.0358185	0.0261628	0.0210863	0.0248435
LOC105371764	0.00908937	0	0	0	0	0.00356592
EPOP	0.410034	0.406501	0.387093	0.499033	0.298842	0.276181
LOC105371761	0	0	0	0	0	0
SRCIN1	0	0	0	0	0.0104599	0.00739418
LOC101929494	0.00637371	0	0	0.00394996	0	0
ARHGAP23	0.441879	0.773811	0.557741	0.183741	0.566408	0.496583
SOCS7	0.282031	0.351259	0.298731	0.266575	0.388487	0.404773
GPR179	0	0	0	0	0	0.0772566
MRPL45	0.466237	0.443457	0.454419	0.399372	0.410478	0.337574
LOC105371760	0	0	0	0	0	0
NPEPPSP1	0.185462	0.132788	0.16476	0.239067	0.205855	0.266302
TBC1D3	0.0615486	0.0365405	0.0409573	0.0423815	0.091088	0.0804885
LOC102723933	0	0	0	0	0	0
RNA5SP526	0	0	0	0	0	0
LOC112268325	0	0	0	0	0	0
TBC1D3E	0.0631487	0.0558031	0.0787915	0.0571972	0.070092	0.102909
LOC102723851	0	0	0	0	0	0
RNU6-489P	0	0	0	0	0	0
YWHAEP7	0	0	0	0.00950892	0.0255462	0
LOC105371757	0	0	0	0	0	0
LOC105371754	0	0	0	0	0	0
LOC107985009	0	0	0	0	0	0
HNF1B	0	0	0	0	0	0
LOC105371756	0	0	0.000297887	0	0	0
LOC105371755	0.000673291	0.00215851	0	0	0.00224196	0
MIR378J	0.0133448	0.00950714	0.00444013	0	0.00493736	0
DDX52	2.14758	2.50008	2.59413	2.15389	2.28007	1.74612
SYNRG	8.51748	9.7105	7.86539	9.45616	8.24065	8.04117
DUSP14	4.438	4.08085	4.06931	5.75655	5.6706	3.58344
LOC100419621	0	0	0	0.00266351	0	0.00379379
TADA2A	3.07441	3.96138	3.15689	2.80781	3.26551	2.70084
C17orf78	0.0251896	0	0.00838118	0	0.00931976	0
SNORA90	0	0	0	0	0	0
RPL18AP12	0	0	0	0	0	0
HMGB1P24	0.00272099	0.00290774	0.00543203	0.00337254	0.00604034	0.00320247
RPS2P49	0	0	0	0	0.0029649	0
ACACA	9.8882	11.6528	11.6647	13.9676	12.2913	13.5086
LOC105371753	0.026712	0.0285454	0.0399947	0	0	0
MIR2909	0	0	0	0	0	0
AATF	9.31463	9.84719	8.40023	9.09985	9.07762	7.80333
LHX1	0	0	0	0	0	0
LHX1-DT	0	0	0	0	0	0
LOC105371750	0.0156165	0	0.0103919	0.0258079	0.0231114	0.0122532
LOC105379600	0	0	0	0	0	0
LOC105371751	0	0	0	0	0	0
LOC105376836	0	0	0	0	0	0
MRM1	14.1592	15.8559	14.6411	11.3495	9.78724	9.47992
LOC107985031	2.21552	1.82949	2.41251	0.374459	1.67667	2.13346
DHRS11	5.84105	6.13791	6.28383	3.09699	6.15912	6.76005
RPS2P50	0.0750147	0.00890703	0.0249591	0.0309924	0.0370056	0.0196197
GGNBP2	2.8429	2.81405	2.64874	2.71082	2.71274	2.31153
PIGW	4.53494	3.61051	3.26424	3.73977	3.20865	3.29601
MYO19	17.8017	15.8998	16.8938	16.6298	14.7301	15.7224
RNA5SP439	0	0	0.0357979	0	0	0
ZNHIT3	28.94	35.5474	33.5355	36.0759	37.1064	37.3888
LOC105371749	0.0432768	0.0462471	0.0431977	0.160919	0.144106	0
TBC1D3JP	0	0.032857	0	0	0	0.0180937
TBC1D3F	0.0679976	0.508652	0.814479	0.25284	0.528319	0.720269
RNU6-1192P	0	0	0	0	0	0
TBC1D3H	0	0	0	0	0	0
LOC100420852	0.00578014	0.00617686	0.0173087	0.00477615	0.00641568	0.00226765
LOC102723414	0	0	0	0	0	0
LOC101060212	0.208532	0.215881	0.182132	0.185773	0.202528	0.283781
CCL23	0.428957	0.440062	0.325411	0.0638007	0.209494	0.323111
CCL15	0	0	0	0	0	0
CCL15-CCL14	0	0	0	0	0	0
CCL14	0	0	0	0	0	0
CCL16	0	0	0	0	0	0.0851227
LYZL6	0	0	0	0	0	0
RDM1	1.7048	1.07652	1.08289	0.480231	0.0860111	0.912029
LOC100133244	0.130493	0	0	0	0	0
LRRC37A9P	0	0	0.055275	0.0686363	0	0
LRRC37A8P	0.00797833	0.110837	0.0398187	0.0197775	0.0354223	0.0281703
LOC105371745	0	0.0291489	0	0	0	0
CCL5	0.284617	0.260701	0.446437	0	0.0902604	0.0957087
LOC105371744	0	0	0	0	0	0
LOC107985049	0.0169707	0.0136016	0.0275269	0.0368102	0.0259004	0.0374507
HEATR9	0	0	0	0	0	0
TAF15	6.39374	6.64802	6.51613	4.72821	4.30661	4.48075
MMP28	0	0	0	0.0211402	0	0
SERPINF1	1.74504	1.72714	1.80029	1.41967	2.48028	2.43151
SERPINF2	0.122763	0.0874592	0.0765865	0.0824195	0.124906	0.150506
WDR81	1.73831	1.74132	1.83201	1.41449	1.85762	2.05283
MIR22	0	0	0	0	0	0
MIR22HG	0.183151	0.150985	0.167146	0.149176	0.092932	0.166289
TLCD2	0.00900138	0.00961919	0	0	0.0149867	0
PRPF8	202.36	220.561	204.657	214.707	201.346	214.302
RILP	29.0198	26.4303	28.1438	28.9181	29.1909	31.9232
SCARF1	12.7937	8.55921	9.65818	17.5894	11.8137	12.337
RN7SL105P	0	0	0	0	0	0
SLC43A2	19.7242	17.2762	16.7214	10.3259	13.1957	16.8543
CRK	0.747986	0.747588	0.793734	0.813083	0.632747	0.760685
YWHAE	9.53931	9.56496	9.21458	9.02774	9.51717	9.1827
ABR-AS1	0	0	0	0	0	0
MRPL14P1	0	0	0	0	0	0
LOC105371480	0	0	0.000951779	0.00472739	0.00105837	0
LOC105371425	0	0	0	0	0	0.00408203
LOC101929045	0	0	0	0	0	0
LINC02091	0	0	0	0	0	0
DOC2B	0	0	0	0	0	0
SCGB1C2	0	0	0	0	0	0
LOC101929828	0	0.0278366	0	0.0322862	0	0
GTF2IP17	0	0	0	0	0	0
LOC101929823	0.718485	0.671823	0.986109	0.333948	0.897169	0.581365
LINC02887	0.0137539	0.0235167	0.0137288	0.00681894	0.0167928	0.00971262
LOC102723777	0.0342591	0.170849	0.0911905	0.0707709	0.152104	0.107523
LOC101929817	0.194186	0.169784	0.308366	0.131282	0.156754	0.155827
UTP4	0.961672	0.856801	0.858036	0.90099	0.672167	0.846212
RNU6-22P	0	0	0	0	0	0
SNTB2	3.24601	3.25599	3.49849	3.67773	2.71877	4.28916
CES5A	0	0	0	0	0	0
CES1	0	0	0	0	0	0
LOC107987423	0	0	0	0	0	0
LOC441750	0	0	0	0	0	0
LOC100133127	0	0	0	0	0	0
LOC105371105	0	0	0	0	0	0
LOC105371098	0	0.192493	0.2697	0	0.199935	0.106002
NPIPA7	1.29744	1.27785	1.23225	1.20009	1.04246	1.14527
MIR6511A3	0	0	0	0	0	0
PKD1P2	11.4164	12.0204	11.4084	11.538	10.5908	13.5735
MIR6770-2	0	0	0	0	0	0
MIR6511A2	0	0	0	0	0	0
PKD1P1	3.7761	3.53127	3.46557	3.68636	3.67804	4.11522
MIR3180-2	0	0	0	0	0	0
MIR3670-2	0	0	0	0	0	0
MIR3179-2	0	0	0.093334	0	0.0518931	0
LOC105371099	0.37402	0.149884	0.046667	0.0579476	0.155679	0.220102
NOMO3	1.32263	1.46164	1.36722	1.63204	1.34172	1.39731
LOC105371100	0	0	0	0	0	0
ABCC6	0.000435898	0.000931632	0.0017404	0.00108055	0.00217722	0.00153909
RPL17P40	0	0.0041214	0	0	0	0
ABCC1	27.605	27.4765	27.07	34.6163	28.8622	30.7948
RPL15P20	0.00417952	0	0	0	0	0
LOC107984869	0	0	0	0	0	0
RNU6-213P	0	0.00158016	0.00147596	0	0	0.00522096
CEP20	6.29308	5.43233	5.1719	6.45243	5.60976	5.4642
MYH11	0.288949	0.123512	0.230736	0.0716277	0.235194	0.136031
NDE1	45.7976	40.4797	45.259	38.0545	42.4874	42.5715
MIR484	0	0	0	0	0	0
MIR6506	0	0	0	0	0	0
MARF1	2.16699	2.70802	2.74647	2.3634	2.698	2.83149
LOC105371102	0.0299087	0.0958845	0.059708	0.0370705	0.0331973	0.0352011
BMERB1	0	0.0517874	0.0483726	0.0600655	0.107579	0
MPV17L	0	0	0.0455081	0	0.0506044	0.160977
NPIPA5	18.6292	18.0842	18.1693	17.9785	17.205	17.853
LOC105371103	0	0	0.163399	0	0.0726788	0
ABCC6P1	0	0.0490486	0	0	0	0
ABCC6P2	0	0	0.159711	0	0	0
NOMO1	52.591	60.4515	56.2807	63.1776	58.5789	61.0261
MIR3179-1	0.0615927	0.026328	0	0	0	0
MIR3670-1	0	0	0	0	0	0
MIR3180-1	0	0	0	0	0	0
MIR1972-1	0	0	0	0	0	0
LOC728138	0.0509438	0.0635137	0.0593257	0.050514	0.0546603	0.0699514
NPIPA1	0.13121	0.070108	0.104776	0.0487888	0.11651	0.123543
MIR3179-3	0	0	0	0	0	0
MIR3670-3	0	0	0	0	0	0
MIR3180-3	0	0	0	0	0	0
LOC102724992	0	0	0	0	0	0
MIR6511A1	0	0	0	0	0	0
LOC100288162	0.174086	0.232543	0.295405	0.237349	0.21255	0.204891
MIR6770-1	0	0	0	0	0	0
NPIPA2	1.09712	1.05114	0.906303	1.10193	0.986801	0.979578
PKD1	16.7135	18.6965	16.2876	15.9785	18.8479	20.5682
LOC102724984	0	0	0	0	0	0
MIR1972-2	0	0	0	0	0	0
NTAN1	0.756571	0.625176	0.671765	0.725109	0.532172	0.496994
RRN3	5.70302	5.3297	5.55338	6.55918	5.25877	5.19611
LOC100505915	0.0127368	0.0115693	0.0108065	0.0157867	0.00636176	0.00974389
NPIPP1	0.196137	0.205489	0.287909	0.324137	0.298807	0.312318
NPIPA8	0.00273769	0.0146279	0.00819804	0	0.00911611	0.00644425
MIR6511B2	0	0	0	0	0	0
PKD1P6-NPIPP1	0.0681718	0.0925089	0.0874891	0.124732	0.102091	0.101886
PDXDC1	4.74038	4.67131	4.82562	4.36251	5.20001	5.11072
MIR4516	0.00414721	0.00443185	0.00827924	0	0	0.00488106
MIR3180-4	0	0	0	0	0	0
LOC105371096	0	0	0	0	0	0
LOC105371097	0	0	0	0	0	0
LOC107984870	0	0	0	0	0	0
LOC100652777	0.0498271	0.0266235	0.0746039	0.0308792	0.165917	0.029322
NPIPA3	0.207843	0.186125	0.185442	0.17414	0.164967	0.239155
LOC105371095	0	0	0	0.000288127	0	0
PLA2G10	0	0.000546152	0.00102028	0	0	0.00180453
RNU7-125P	0	0.0446287	0	0	0	0
BFAR	0.612913	0.51457	0.521578	0.519631	0.507489	0.505942
RN7SL274P	0	0	0	0	0	0
LOC107984865	0	0.0038753	0.00241318	0.00299651	0.00670856	0.0014227
LOC105371094	0.00432974	0	0.00108046	0	0.00120145	0
LOC107987416	0	0	0	0	0	0
PARN	47.8808	44.1257	47.0624	42.0443	42.6896	40.8432
CDIP1	138.159	107.937	104.75	134.797	103.508	103.24
HMOX2	0.0647454	0.0615277	0.0565899	0.0650741	0.0516639	0.0498495
NMRAL1	13.1377	10.8269	12.5666	9.77841	7.41096	8.79661
DNAJA3	21.5989	21.9941	21.5094	22.5536	20.4378	20.4544
VASN	4.93904	5.68164	4.35	2.80878	5.22411	5.77881
CORO7	0.555555	0.570517	0.616755	0.705379	0.788095	0.720842
PAM16	0.495941	1.19245	0.247517	0.153674	0.825707	0.583699
CORO7-PAM16	0	0	0	0	0	0
GLIS2-AS1	0.0198783	0.00708087	0.0198419	0	0.0147093	0
GLIS2	0.164601	0.174342	0.161392	0.155268	0.137429	0.181727
HS3ST6	0	0	0	0	0	0
LINC02124	0	0	0	0	0	0
LINC00254	0	0	0	0	0	0
CAPN15	2.57818	2.91776	2.81611	2.32592	2.13335	2.43658
LINC00235	0.00519416	0.00832599	0.0207386	0.00321896	0.0144132	0.0122266
LOC107987417	0	0	0	0	0	0
RAB11FIP3	1.14736	1.1227	1.1054	0.99185	1.03824	0.988835
DECR2	2.16058	2.13955	2.52325	2.16913	1.88653	2.0767
CPEB1	0.370408	0.361411	0.401881	0.279455	0.39326	0.51177
RPS17	4.05042	4.28075	4.93711	4.62886	4.48092	4.75035
DNM1P38	0	0	0	0	0.0283938	0.0301077
LOC105370926	0.0157852	0	0.0157563	0	0	0.0371567
GOLGA2P10	0.746682	0.588949	0.585606	0.528845	0.47359	0.816037
CSPG4P10	0.0813191	0.278081	0.0811704	0.100791	0.198573	0.267984
UBE2Q2P6	0	0.0532099	0	0	0	0.0976721
LOC102724034	0	0	0	0	0	0
GOLGA6L3	0.0114522	0.00874157	0.0212294	0.0101389	0.00363182	0.00385105
GOLGA6L9	0.806886	0.875953	1.04831	0.523861	1.02355	0.934591
RPL9P8	10.8829	10.525	12.2993	13.1189	13.2542	13.2674
UBE2Q2P2	0.0030357	0.00324405	0.0111105	0.00752522	0.0146011	0.0142915
GOLGA6L4	1.15516	1.43355	1.11586	1.06228	0.78585	1.535
DNM1P41	0.00211223	0	0.00210837	0.00261801	0	0
LOC103171574	0	0.0105525	0	0	0	0
UBE2Q2L	0.000901583	0.000963463	0.00449967	0	0	0
LOC440300	0.0143657	0.00307034	0.0229431	0.00712225	0.00956714	0.0135262
LOC105379597	0	0	0	0	0	0
LOC101929479	0.346619	0.158747	0.0988527	0.245496	0.274807	0.174837
GOLGA2P7	0.00792797	0.00988413	0.00923238	0.00818863	0.0117329	0.0077757
GOLGA6L10	0.019885	0.0271118	0.0355907	0.0118983	0.0235936	0.0355091
DNM1P43	0	0	0	0	0	0
ADAMTS7P1	0	0	0	0	0.00089651	0
MIR4311	0	0	0	0	0	0
LOC105370867	0	0	0	0	0	0
MEGF11	0.0316541	0.0182143	0.0145828	0.00905395	0.0270265	0.0257921
RNU1-119P	0	0	0	0	0	0
LOC105370798	0	0	0	0	0	0
SORD2P	0.174234	0.195225	0.150554	0.169219	0.161641	0.149208
TRIM69	0	0.00599137	0	0.00694909	0.0248921	0
LOC100419583	0.103387	0.0900235	0.0955539	0.151874	0.123255	0.0833747
MIR10393	0	0	0	0	0	0
B2M	52.2571	48.9026	52.7816	62.8927	59.9142	59.6186
PATL2	0.163705	0.154359	0.0961207	0.167098	0.101541	0.119004
LOC107987422	0	0	0	0	0	0
CYFIP1	20.5783	19.1241	17.6063	24.7544	15.0709	16.4348
GOLGA8IP	0.00479325	0.000853705	0.000797413	0.00495084	0.00266014	0.00282071
RN7SL495P	0	0	0	0	0	0
LOC101927846	0	0	0.0974377	0.120991	0	0
LOC100419579	0.386097	0.501384	0.356121	0.242304	0.216987	0.253093
HERC2P2	19.7001	23.5699	25.7672	17.1414	23.1705	23.5535
HERC2P7	0.018793	0.0200829	0.0187587	0.0232931	0.0104297	0.00552963
LOC112268161	0	0	0	0	0	0
MPHOSPH10P9	0	0	0	0	0	0
GOLGA8EP	0.00378724	0	0.00252021	0.0015647	0.00280244	0.0029716
SPATA31E3P	0	0	0	0	0	0
LOC441711	0.0439037	0.038539	0.0344327	0.0310952	0.0191443	0.0350635
LOC102724737	0	0	0	0	0	0.00524158
LOC107987218	0	0	0	0	0	0
FAM30C	0	0	0	0.00401687	0	0
OR4M2B	0	0	0	0	0	0
OR4H6P	0	0	0	0	0	0
LOC107987217	0	0	0	0	0	0
LINC02203	0	0	0	0	0	0
OR11J6P	0	0	0	0	0	0
OR11J2P	0	0	0	0	0	0
MIR5701-2	0	0	0	0	0	0
NF1P9	0	0	0	0	0	0
LOC105369227	0	0	0	0	0	0
LOC107984135	0	0	0	0	0	0
VN1R60P	0	0	0	0	0	0
RNU6-631P	0	0	0	0	0	0
MIR3118-3	0	0	0	0	0	0
POTEB3	0	0	0	0	0	0
GRAMD4P6	0	0	0	0	0	0
CXADRP2	0	0	0	0	0	0
LONRF2P4	0	0	0	0	0	0
RNU6-1235P	0	0	0	0	0	0
LOC105379593	0	0	0	0	0	0
LOC646214	0.985753	0.925724	1.63992	1.66608	1.22676	1.19534
LOC105370714	0	0	0	0	0	0
LOC105370715	0	0	0	0	0	0
NBEAP4	0	0	0	0	0	0
IGHV5-78	0	0	0	0	0	0
MIR5195	0	0	0	0	0	0
IGHVIII-76-1	0	0	0	0	0	0
IGHV3-76	0	0	0	0	0	0
IGHV3-75	0	0	0	0	0	0
IGHVII-74-1	0	0	0	0	0	0
IGHV3-74	0	0	0	0	0	0
IGHV3-73	0	0	0	0	0	0
IGHV3-72	0	0	0	0	0	0
IGHV3-71	0	0	0	0	0	0
IGHV2-70	0	0	0	0	0	0
IGHV1-69D	0	0	0	0	0	0
IGHV1-69-2	0	0	0	0	0	0
IGHV3-69-1	0	0	0	0	0	0
IGHV2-70D	0	0	0	0	0	0
IGHV1-69	0	0	0	0	0	0
IGHV1-68	0	0	0	0	0	0
IGHVIII-67-4	0	0	0	0	0	0
IGHVIII-67-3	0	0	0	0	0	0
IGHVIII-67-2	0	0	0	0	0	0
IGHVII-67-1	0	0	0	0	0	0
SLC20A1P1	0	0	0	0	0	0
IGHV1-67	0	0	0	0	0	0
IGHV3-66	0	0	0	0	0	0
IGHVII-65-1	0	0	0	0	0	0
IGHV3-65	0	0	0	0	0	0
LOC102724977	0	0	0	0	0	0
IGHV3-64	0	0	0	0	0	0
GOLGA4P3	0	0	0	0	0	0
IGHV3-63	0	0	0	0	0	0
IGHVII-62-1	0	0	0	0	0	0
IGHV3-62	0	0	0	0	0	0
IGHV4-61	0	0	0	0	0	0
IGHVII-60-1	0	0	0	0	0	0
RNA5SP389	0	0	0	0	0	0
IGHV3-60	0	0	0	0	0	0
IGHV4-59	0	0	0	0	0	0
IGHV1-58	0	0	0	0	0	0
IGHV3-57	0	0	0	0	0	0
IGHV7-56	0	0	0	0	0	0
IGHV4-55	0	0	0	0	0	0
IGHV3-54	0	0	0	0	0	0
IGHVII-53-1	0	0	0	0	0	0
IGHV3-53	0	0	0	0	0	0
IGHV3-52	0	0	0	0	0	0
IGHVII-51-2	0	0	0	0	0	0
IGHV8-51-1	0	0	0	0	0	0
IGHV5-51	0	0	0	0	0	0
IGHV3-50	0	0	0	0	0	0
IGHVII-49-1	0	0	0	0	0	0
IGHV3-49	0	0	0	0	0	0
IGHV3-48	0	0	0	0	0	0
IGHVIII-47-1	0	0	0	0	0	0
IGHV3-47	0	0	0	0	0	0
IGHVII-46-1	0	0	0	0	0	0
IGHV1-46	0	0	0	0	0	0
IGHV1-45	0	0	0	0	0	0
IGHVII-44-2	0	0	0	0	0	0
IGHVIV-44-1	0	0	0	0	0	0
LINC00221	0	0	0	0	0	0
IGHVIII-44	0	0	0	0	0	0
IGHVII-43-1	0	0	0	0	0	0
IGHV3-43	0	0	0	0	0	0
IGHV3-42	0	0	0	0	0	0
HOMER2P1	0	0	0	0	0	0
IGHV3-41	0	0	0	0	0	0
IGHVII-40-1	0	0	0	0	0	0
IGHV7-40	0	0	0	0	0	0
IGHV4-39	0	0	0	0	0	0
IGHVIII-38-1	0	0	0	0	0	0
IGHV3-38	0	0	0	0	0	0
IGHV3-37	0	0	0	0	0	0
IGHV3-36	0	0	0	0	0	0
IGHV3-35	0	0	0	0	0	0
IGHV7-34-1	0	0	0	0	0	0
IGHV4-34	0	0	0	0	0	0
IGHV3-33-2	0	0	0	0	0	0
IGHVII-33-1	0	0	0	0	0	0
IGHV3-33	0	0	0	0	0	0
GOLGA4P1	0	0	0	0	0	0
IGHV3-32	0	0	0	0	0	0
IGHVII-30-21	0	0	0	0	0	0
IGHV4-30-2	0	0	0	0	0	0
IGHV3-30-2	0	0	0	0	0	0
IGHVII-30-1	0	0	0	0	0	0
IGHV3-30	0	0	0	0	0	0
GOLGA4P2	0	0	0	0	0	0
IGHV3-29	0	0	0	0	0	0
IGHVII-28-1	0	0	0	0	0	0
IGHV4-28	0	0	0	0	0	0
IGHV7-27	0	0	0	0	0	0
IGHVII-26-2	0	0	0	0	0	0
IGHVIII-26-1	0	0	0	0	0	0
IGHV2-26	0	0	0	0	0	0
IGHVIII-25-1	0	0	0	0	0	0
IGHV3-25	0	0	0	0	0	0
LINC00226	0	0	0	0	0	0
HOMER2P2	0	0	0	0	0	0
IGHV1-24	0	0	0	0	0	0
IGHV3-23	0	0	0	0	0	0
IGHVIII-22-2	0	0	0	0	0	0
IGHVII-22-1	0	0	0	0	0	0
IGHV3-22	0	0	0	0	0	0
IGHV3-21	0	0	0	0	0	0
IGHVII-20-1	0	0	0	0	0	0
IGHV3-20	0	0	0	0	0	0
LOC105370700	0	0	0	0	0	0
IGHV3-19	0	0	0	0	0	0
IGHV1-18	0	0	0	0	0	0
SLC20A1P2	0	0	0	0	0	0
IGHV1-17	0	0	0	0	0	0
IGHVIII-16-1	0	0	0	0	0	0
IGHV3-16	0	0	0	0	0	0
IGHVII-15-1	0	0	0	0	0	0
IGHV3-15	0	0	0	0	0	0
IGHV1-14	0	0	0	0	0	0
IGHVIII-13-1	0	0	0	0	0	0
IGHV3-13	0	0	0	0	0	0
IGHV1-12	0	0	0	0	0	0
IGHVIII-11-1	0	0	0	0	0	0
IGHV3-11	0	0	0	0	0	0
IGHV5-10-1	0	0	0	0	0	0
IGHV3-64D	0	0	0	0	0	0
IGHV3-7	0	0	0	0	0	0
IGHV3-6	0	0	0	0	0	0
IGHVIII-5-2	0	0	0	0	0	0
IGHVIII-5-1	0	0	0	0	0	0
IGHV2-5	0	0	0	0	0	0
IGHV7-4-1	0	0	0	0	0	0
IGHV4-4	0	0	0	0	0	0
LOC107984634	0	0	0	0	0	0
IGHV1-3	0	0	0	0	0	0
IGHVIII-2-1	0	0	0	0	0	0
IGHV1-2	0	0	0	0	0	0
RPS8P1	1.07447	1.23711	1.37004	1.16851	1.41575	1.24013
ADAM6	0	0	0	0	0	0
IGHVII-1-1	0	0	0	0	0	0
IGHV6-1	0	0	0	0	0.0139594	0
IGHD1-1	0.00508322	0.00232804	0.00217454	0	0.00403009	0.00256402
FAM30A	10.494	7.89932	7.4608	10.3073	8.24137	8.52522
IGHD2-2	0.0621271	0.0663912	0.0413423	0.0513358	0.0689581	0.0974941
IGHD3-3	0.0194834	0	0	0.120744	0.15138	0.0687931
IGHD4-4	0.0209438	0.00373021	0.00696848	0	0.00387443	0.0041083
IGHD5-5	0.0691802	0	0.0517902	0	0.05759	0.0610663
IGHD6-6	0.00689763	0.00442263	0.001377	0.00341972	0.00306241	0.00324727
IGHD1-7	0	0	0	0.00192712	0.00345154	0
IGHD2-8	0.000643441	0.000687604	0.00128453	0	0.00285676	0.000757299
IGHD3-9	0	0	0.0404131	0.0501819	0	0.0476514
IGHD3-10	0	0	0	0	0	0
IGHD4-11	0.00224717	0	0	0.00092842	0	0.00176321
IGHD5-12	0.00468961	0	0.00234051	0	0.00260262	0.00137986
IGHD6-13	0.00708277	0.00378445	0.00706981	0	0.00393077	0.0208402
IGHD1-14	0	0	0	0	0	0.0105782
IGHD2-15	0.00570371	0	0	0	0	0.00671299
IGHD3-16	0.0753502	0.120783	0.0376062	0.0466965	0	0.0443418
IGHD4-17	0	0	0	0	0.0131129	0.0278089
IGHD5-18	0	0	0	0.00888823	0	0
IGHD6-19	0.00116793	0	0.00116579	0.00434277	0.00129634	0.00137459
IGHD1-20	0.172016	0	0	0	0.0954646	0.303681
IGHD2-21	0	0	0	0	0	0
IGHD3-22	0	0	0	0	0.0166613	0
IGHD4-23	0	0	0	0	0	0
IGHD5-24	0	0	0	0	0	0
IGHD6-25	0	0	0	0.00289994	0	0
IGHD1-26	0	0	0	0	0	0
IGHJ1P	0	0	0	0	0	0
IGHD7-27	0	0	0	0	0	0
IGHJ1	0	0	0	0	0	0
IGHJ2	0	0	0	0	0	0
IGHJ2P	0	0	0	0	0	0
IGHJ3	0.00229669	0	0	0	0	0
IGHJ4	0	0	0	0	0	0
IGHJ5	0	0	0	0	0	0
IGHJ3P	0	0	0	0	0	0
IGHJ6	0	0	0	0	0	0
MIR4537	0	0	0	0	0	0
MIR4538	0	0	0	0	0	0
MIR4507	0	0	0	0	0	0
MIR4539	0	0	0	0	0	0
IGHM	0.0468903	0.0501086	0	0	0.026023	0.0551876
IGHD	0	0	0	0	0	0
ATP6V1G1P1	0	0	0	0	0	0
IGHG3	0	0	0	0	0	0
LOC105378184	0.060979	0.0521314	0.024347	0.0151161	0.0406102	0.0717693
IGHG1	0	0	0	0	0	0
LOC107987211	0	0	0	0	0	0
IGHEP1	0	0	0	0	0	0
IGHA1	0	0	0	0	0	0
LOC105378185	0	0	0	0	0	0
ELK2AP	0	0	0	0	0	0
IGHGP	0	0	0	0	0	0
LOC105378187	0	0	0	0	0	0
LOC112268138	0	0	0	0	0	0
IGHG2	0	0	0	0	0	0
MIR8071-2	0	0	0	0	0	0
IGHG4	0	0	0	0	0	0
MIR8071-1	0	0	0	0	0	0
IGHE	0	0	0	0	0	0
IGHA2	0	0	0	0	0	0
IGH	0	0	0	0	0	0
LOC107987414	0	0	0	0	0	0
LOC105370698	0	0	0	0.00242975	0	0
ELK2BP	0	0	0	0	0	0
ATP5MC1P1	0	0	0	0	0	0
LOC105370697	0	0	0	0	0	0
TMEM179	0	0	0	0	0	0
C14orf180	0	0	0	0	0	0
CEND1P1	0	0	0	0	0	0
SERPINA1	0	0	0	0	0	0
SERPINA2	0	0	0	0	0	0
SERPINA6	0	0	0	0	0	0
SERPINA10	0	0	0	0	0	0
PPP4R4	0	0.0184154	0	0	0	0
LOC105370634	0	0	0	0	0	0
IFI27L2	0.00330723	0.00242978	0.00350751	0.00281818	0.00367087	0.00267606
IFI27	0.134813	0.16623	0.150094	0.0642673	0.235965	0.140361
IFI27L1	1.34563	0.983883	1.01798	1.01826	1.21059	1.16696
DDX24	6.40733	6.49242	6.26366	5.83941	5.79124	5.25362
OTUB2	0.0608468	0.0866974	0.0506129	0.163403	0.0225124	0.095485
CCDC197	0	0	0	0	0	0
LOC107984663	0	0.00160592	0	0	0	0
MIR4506	0	0	0	0	0	0
ASB2	0	0	0	0	0	0
FAM181A	0	0	0	0	0	0
FAM181A-AS1	0	0	0	0	0	0
LOC105370631	0	0	0	0	0	0
PRIMA1	0	0	0	0	0	0
RNU6-1258P	0	0	0	0	0	0
COX8C	0	0	0	0	0	0
UNC79	0.258023	0.0689332	0.321939	0.19988	0.178996	0.303681
RPL36AP4	0.0314455	0	0	0.0389753	0	0.0370099
BTBD7	18.2467	19.0226	16.4969	13.8143	17.8848	17.0155
RPL18AP1	0	0.0687011	0.0962566	0.159366	0.0713574	0.0378323
UBR7	40.4496	41.9967	42.927	40.7103	42.3437	40.7256
GON7	5.26855	6.51199	5.22723	6.84483	6.05921	6.7985
TMEM251	8.69352	7.75133	9.47617	7.80046	8.58381	9.22749
MOAP1	10.2627	9.07155	11.73	11.5816	12.024	14.3155
CYB5AP3	0	0	0	0	0	0
ITPK1-AS1	0.0104995	0.00374005	0	0	0	0
ITPK1	1.15497	1.12653	1.08657	0.91712	0.916061	0.985313
CHGA	0	0.00321925	0.00300697	0	0	0.00177277
LINC02287	0	0	0	0	0	0
LINC02833	0	0	0	0	0	0
TC2N	0	0	0.00503562	0	0	0.00593754
LOC100128939	0	0	0	0	0	0
NANOGP7	0	0	0	0	0	0
POLR3GP1	0.00951562	0.0101687	0.00316607	0.00294854	0.00264047	0
CATSPERB	0	0	0	0	0	0
LOC101928957	0.000739838	0	0	0	0	0
LINC00552	0	0	0	0	0	0
LOC105377805	0	0	0	0	0	0.0017068
GRK1	0.0123536	0.0132015	0.036993	0.0153117	0.0274238	0
TUBGCP3	0.759297	0.8482	0.80659	1.03712	0.937252	0.964563
LOC105370372	0	0	0	0	0	0
SPACA7	0	0	0	0	0	0
LOC105370373	0	0	0	0	0	0
LINC01044	0	0	0	0	0	0
LINC01043	0	0	0	0	0	0
LOC107984555	0	0	0	0	0	0
LOC101928730	0	0	0	0	0	0
LINC01070	0	0	0	0	0	0
LOC105370370	0	0	0	0	0	0
ATP8A2	0	0	0.132261	0	0	0
RNU6-76P	0	0	0	0	0	0
RNU6-55P	0	0	0	0	0	0
RHOT1P3	1.17987	1.15278	1.21136	0.626743	1.3096	1.1506
ANKRD20A9P	0	0	0	0	0	0
LINC00328-2P	0	0	0	0	0	0
SNX18P26	0	0	0	0	0	0
CYP4F34P	0	0.00243232	0	0	0	0
LINC00417	0	0	0	0	0	0
ZNF965P	0	0	0	0	0	0
CNN2P12	0	0	0	0	0	0
GXYLT1P1	0	0	0	0	0	0
BCYRN1P3	0	0	0	0	0	0
PIWIL1	0	0	0	0	0	0
LOC101927786	0	0	0	0	0	0
LINC02825	0	0	0	0	0	0
LOC107984448	0	0	0	0	0	0
LOC101927531	0	0	0	0	0	0
LOC105379613	0	0	0	0	0	0
CCDC92	0.783598	0.684958	0.716252	0.552185	0.550194	0.549209
DNAH10	0.170833	0.148435	0.0988064	0.128627	0.0655684	0.12402
ANO4	0	0	0	0	0	0
RNU6-768P	0	0	0	0	0	0
SLC5A8	0	0	0	0	0	0
RPS6P19	0	0	0	0	0	0
METTL15P2	0	0	0	0	0	0
RPS6P22	0	0	0	0	0	0
LOC107987421	0	0	0	0	0	0
GIHCG	2.55836	2.80383	2.72502	2.4922	3.27514	3.73257
ATP23	0.837535	1.09391	0.856645	0.999639	1.06161	1.05267
LOC100533641	0.00550738	0.0137326	0	0	0.0122259	0.00432128
RN7SKP65	0	0	0	0	0	0
ST13P8	0.00426237	0	0	0	0	0
LINC02403	0	0	0	0	0	0
LOC105369784	0	0	0	0	0	0
FLJ13224	0.00609478	0.0130262	0.0304182	0.0075542	0	0.0430396
SINHCAF	1.07241	1.05071	1.0838	1.42454	1.38582	1.27004
LOC100419525	0	0	0.00509067	0	0	0.00200082
MREGP1	0	0	0	0	0	0
RPL13AP22	0.22202	0.358524	0.167442	0.403603	0.306671	0.313568
MTCYBP26	0	0	0	0	0	0
MTND6P26	0	0	0	0	0	0
MTND5P43	0	0	0	0	0	0
LOC107987168	0	0	0	0	0	0
LOC101060058	0	0	0	0	0	0
OVOS2	0	0.0796418	0.297561	0	0.206803	0.0877143
PRB2	0	0	0	0	0	0
TAS2R18P	0	0	0	0.0493038	0.0441524	0.0468175
TAS2R43	0	0	0	0	0	0
TAS2R64P	0	0	0.0214369	0.0088729	0.00794584	0
LOC574538	0	0	0	0	0	0
LOC105369593	0	0.0119687	0	0.0277637	0.0124314	0
IQSEC3	3.30157	3.9379	2.67895	3.16811	3.73551	3.68523
FAM138D	0	0	0	0	0.00156347	0
LOC107987170	0	0.0233494	0	0.00902724	0.0161681	0.0257161
WASH8P	0.221984	0.22174	0.217751	0.209655	0.227475	0.249731
DDX11L8	0.0324356	0.0173309	0.0215842	0.067004	0.00600032	0.0190875
LINC02697	0	0	0	0	0	0
LOC338694	0	0	0.00136347	0	0	0
LOC105369366	0	0	0	0	0	0
LOC107987426	0	0	0	0	0	0
OR5G3	0	0	0	0	0	0
OR5G5P	0	0	0	0	0	0
OR5G4P	0	0	0	0	0	0
OR5G1P	0	0	0	0	0	0
OR9G2P	0	0	0	0	0	0
MIR6128	0	0	0	0	0	0
OR9G4	0	0	0	0	0	0
OR9G3P	0	0	0	0	0	0
OR9G9	0	0	0	0	0	0
OR9G1	0	0	0	0	0	0
OR8U9	0	0	0	0	0	0
OR8U8	0	0	0	0	0	0
RPL5P29	0.36182	0.386653	0.386955	0.416426	0.545032	0.334592
OR8J1	0	0	0	0	0	0
OR8K1	0	0	0	0	0	0
OR8K2P	0	0	0	0	0	0
FAM8A2P	0	0	0	0	0	0
OR8K3	0	0	0	0	0	0
OR8I1P	0	0	0	0	0	0
OR8H1	0	0	0	0	0	0
OR5T1	0	0	0	0	0	0
OR5T3	0	0	0	0	0	0
OR5T2	0	0	0	0	0	0
OR8J2	0	0	0	0	0	0
NAA50P1	0	0	0	0	0	0
NLRP10	0	0	0	0	0	0
OR10A3	0	0	0	0	0	0
OR10A6	0	0	0	0	0	0
LOC107984307	0	0	0	0	0	0
RNU6-943P	0	0	0	0	0	0
LOC283299	0	0	0	0	0	0
OR5E1P	0	0	0	0	0	0
OR5P3	0	0	0	0	0	0
OR5P2	0	0	0	0	0	0
RPL7AP55	0	0	0	0	0	0
RNU1-91P	0	0	0	0.0321197	0	0.0305
CARS1-AS1	0.177892	0.0316836	0.0295944	0.0367481	0.0329086	0
CARS1	24.6349	23.793	23.8235	29.6236	53.798	57.9097
SNORA54	0.033404	0	0	0	0	0
NAP1L4	98.6709	98.0192	98.3278	89.2008	90.6943	88.1521
PHLDA2	0.485708	0.490209	0.430951	1.00336	0.269557	0.317586
SLC22A18	0.23432	0.202707	0.278442	0.165959	0.161004	0.183856
SLC22A18AS	0.131018	0.0466702	0.0435929	0.216522	0.0484747	0.154202
LOC107987413	0	0	0	0	0	0
CDKN1C	0.066114	0.0565214	0.158383	0.0163891	0.0293534	0.077813
KCNQ1DN	0	0.243487	0	0.141204	0	0
KCNQ1-AS1	0	0	0	0	0	0
LOC107987412	0	0	0	0	0	0
COX6CP18	0	0	0	0	0	0
KCNQ1	0.218164	0	0	0.162243	0.0968608	0.0513538
DEAF1	66.0549	81.9043	71.3866	59.7895	71.3589	73.6881
DRD4	0.345901	0.184821	0.345268	0.107182	1.1518	0.814217
SCT	0.0811808	0.173505	0.243097	0.10062	0.180214	0.191092
CDHR5	0.343412	0.366982	0.257088	0	0.0952929	0.505225
IRF7	19.5354	14.5226	18.0584	20.1075	20.3635	18.9936
PHRF1	159.318	164.947	160.504	134.524	103.645	115.95
LOC143666	0.542436	1.07652	1.08289	0	1.11814	1.91526
MIR210	0.00402618	0	0.00401881	0	0	0
MIR210HG	0.677617	1.77008	0.601224	0.839875	1.16997	1.15198
RASSF7	23.6756	23.2536	22.791	17.7589	17.3491	19.9294
LMNTD2-AS1	0.919441	0.900668	1.5296	1.89934	0.765402	1.17232
LMNTD2	4.55335	6.08234	5.83278	4.32682	4.63284	4.82317
LRRC56	0.599176	0.480225	0.614693	0.453842	0.677372	0.417897
HRAS	31.1876	33.143	38.3943	36.4007	23.174	23.961
LOC101059906	0.63561	0.57735	0.983394	0.433295	0.246924	0.523658
LOC105376507	0	0	0	0	0	0
RNH1	758.265	743.669	745.726	552.37	737.927	784.861
PTDSS2	94.7867	110.159	106.979	89.0285	87.9263	97.1129
DLG5-AS1	0.228394	0.488139	0.56994	0.707709	0.253506	0.672022
RN7SL284P	0	0	0	0	0	0
LOC101929347	0	0	0.227976	0	0	0
DLG5	57.3708	40.7127	48.0944	50.6926	39.9237	38.509
IMPDH1P5	0.103996	0.0222268	0.0830449	0.0515595	0.0461724	0.0734392
RNU6-1266P	0	0	0	0.0740482	0	0
MARCHF8	67.3339	69.7032	65.9485	91.9466	87.486	82.8453
LOC102724323	0	0	0.216577	0	0	0
ALOX5	9.94906	2.94074	3.27507	2.75489	4.9341	4.98279
OR13A1	0	0	0	0	0	0.377054
OR6D1P	0	0	0	0	0	0
CUBNP2	0	0	0	0	0	0
LOC105378283	0	0	0	0	0	0
RNU6-1207P	0	0	0	0	0	0
LOC101929816	0	0	0	0	0	0
PABPC1P8	0	0	0	0	0	0
LOC101929373	0	0	0	0	0	0
LOC105378267	0	0	0	0	0	0.0213779
LOC107984164	0	0	0	0	0	0
KSR1P1	0	0	0	0	0	0
PTCHD3	0	0	0	0	0	0
TRIAP1P1	0	0	0	0	0	0
FAM210CP	0	0	0	0	0	0
LINC02673	0	0	0	0	0	0
RNU6-452P	0	0	0	0	0	0
RNU6-666P	0	0	0	0	0	0
LOC102724245	0	0	0	0	0	0
ODAD2P1	0	0	0	0	0	0
FYTTD1P1	0	0	0	0	0	0
BAAT	0.0900648	0.0962464	0.4495	0.223262	0	0.636011
LOC100421197	0	0	0	0	0	0
ACNATP	0	0	0	0	0	0
LOC105376182	0	0	0	0	0	0
LOC105376183	0	0	0	0	0	0
TRPC6P4	0	0	0	0	0	0
PLPPR1	0	0	0	0	0	0.012532
GAPDHP26	0	0	0.00269924	0	0	0
LOC100129340	0	0	0	0	0	0
LOC389768	0.000523041	0	0.000261042	0.000324143	0.000580551	0.000307797
RNU2-5P	0	0	0	0	0	0
MAMDC2-AS1	0.0029767	0	0	0	0	0
LOC105379611	0	0	0	0	0	0
MAMDC2	0.0226336	0	0	0	0	0.0266387
APBA1	0	0	0	0	0	0.129748
LOC101929802	0	0	0	0	0	0
RPL4P5	15.0375	18.7066	15.6258	19.8808	16.6053	16.337
LOC107987408	0	0	0	0	0	0
LOC107986986	0.0143995	0.0230817	0.0215597	0.00892376	0.0239741	0.00847376
ZNF251	1.58148	1.07832	1.31488	1.74642	1.47842	1.26968
LOC100996662	0.0402821	0.0645703	0	0.0249639	0	0.118525
PUF60	125.912	108.312	109.733	119.997	107.273	116.084
MIR937	0	0	0	0	0	0
SCRIB	291.003	299.896	290.471	284.426	249.823	264.097
LOC105375800	0	0	0	0	0	0
IQANK1	3.18229	4.77937	2.91892	2.55847	3.2458	3.03681
MIR4664	0.0404443	0.0126059	0.018503	0.0146209	0.0243161	0.015867
FAM83H	5.33492	7.29672	5.72882	5.22437	6.4049	6.11419
MAPK15	0.94947	1.37143	1.3539	0.698335	1.43604	1.67008
LOC101928160	0	0	0	0	0.0261128	0
CCDC166	0	0	0	0	0	0
LINC02878	0.00227198	0.0145675	0.0090713	0.00563203	0.00252179	0.00802204
ZNF707	3.66796	3.29509	2.79879	3.51732	3.19683	3.91821
LOC105375799	0	0	0	0	0.00337492	0.00178932
ZNF623	14.777	14.1962	15.5248	13.5053	14.8113	13.6675
GFUS	18.201	17.1101	18.12	13.8975	16.1645	16.7599
PYCR3	22.3142	20.8331	22.9889	13.6215	13.1529	15.8027
TIGD5	47.9036	40.6095	42.7471	36.8205	32.1279	31.2781
EEF1D	266.803	273.815	274.58	255.329	244.485	268.636
NAPRT	4.16194	3.93989	4.09308	2.75527	3.61547	3.89768
MROH6	14.8838	19.0935	15.75	17.0509	18.8383	21.6921
LOC100310756	2.56927	2.23327	1.9265	2.3617	2.55158	2.45964
GSDMD	37.7477	33.0932	36.1239	36.0741	34.3049	35.5849
RN7SKP175	0	0	0	0	0	0
ZC3H3	106.199	119.515	103.67	101.961	103.065	98.762
LY6H	0	0	0	0	0	0
LY6L	0	0	0	0	0	0
LOC107984154	0	0	0	0	0	0
LOC102725000	0	0	0	0	0	0
LOC105379589	0	0	0	0	0	0
LOC105375795	0	0.00183557	0	0	0	0
LINC02904	0.00275348	0.0176548	0.0137422	0.0136512	0.0122249	0.00648143
LY6E	44.1465	39.3218	37.7098	41.7853	39.1487	40.9793
LY6E-DT	0.101665	0.0465614	0.0579883	0.0300023	0.0537351	0.0512808
MIR1302-7	0	0	0	0	0	0
HNRNPA1P38	0	0	0	0	0	0
FP248	0	0	0	0	0	0
MROH5	0	0	0	0.285819	0	0
PTP4A3	0.873404	0.691351	0.670398	0.639331	0.462967	0.492051
LOC105375790	0	0	0.00158714	0	0.000588293	0.00249521
LOC101928037	0	0	0.00865261	0	0	0.00680157
GPR20	0.0853924	0.0608355	0.0284121	0	0.157969	0
LINC01300	0	0	0	0.00148778	0	0
LINC00824	0	0	0	0	0	0
RNU6-596P	0	0	0	0	0	0
LINC00588	0	0	0	0	0	0
LOC286177	0	0	0	0	0	0
LINC01606	0	0	0	0	0	0
ADAM2	0	0	0	0	0	0
ADAM18	0.000594831	0	0	0.000737266	0	0
LOC100130964	0	0	0	0	0	0
ADAM5	0	0	0	0	0	0
LOC100420403	0	0	0	0	0	0
RPL3P10	0	0	0	0	0.000708971	0
ADAM32	0.020745	0.0443377	0	0.0257125	0.023026	0.0732477
ADAM9	0.914815	1.07084	1.03718	1.16337	1.38811	1.40032
LOC107986910	0.0111036	0	0.0110833	0	0	0
OR7E157P	0	0	0	0	0	0
FAM90A23	0	0	0	0	0	0
FAM90A22	0	0	0	0	0	0
FAM90A21P	0	0	0	0	0	0
LOC105377800	0	0	0	0	0	0
FAM90A7	0	0	0	0	0	0
FAM90A6P	0	0	0	0	0	0
PRR23D1	0	0	0	0	0	0
LOC101927997	0	0	0	0	0	0
LOC105377801	0	0	0	0	0	0
DEFB107B	0	0	0	0	0	0
DEFB105B	0	0	0	0	0	0
DEFB106B	0	0	0	0	0	0
DEFB104B	0	0	0	0	0	0
SPAG11B	0	0	0	0	0	0
DEFB103B	0	0	0	0	0	0
HSPD1P3	0.0329885	0.0176263	0.0658563	0.0204439	0	0
DEFB4B	0	0	0	0	0	0
DEFB108C	0	0	0	0	0	0
ZNF705G	0	0	0	0	0	0
ZNF705CP	0	0	0	0	0	0
FAM66D	0	0	0	0	0	0
LOC649352	0	0	0	0	0	0
DEFB109B	0	0	0	0	0	0
LOC105377785	0.422916	0.383169	0.211071	0.250697	0.285732	0.378724
LOC107986865	1.1491	1.22797	1.364	0.923844	0.930733	1.09657
LOC101927815	0.691301	0.923435	1.65609	0.771152	1.07424	1.01703
LOC107987411	0	0	0	0	0	0
LOC105377784	0	0	0	0	0	0
LOC105377783	0	0	0	0	0.0193297	0
LOC105377782	0.00330891	0.0100187	0.00440381	0.0136708	0.00612122	0.00194721
LOC105377781	0.0101442	0.0195127	0.00405024	0.0201171	0.0112595	0.00955134
[truncated: 52,629 more rows]

## Sheet: Mouse ERG TPM
	ERG 1	ERG 2	ERG 3	NC 1	NC 2	NC 3
Xkr4	0	0	0	0	0	0
Gm39585	0	0	0	0	0	0
Gm38717	0.0392353	0	0	0	0	0
Rp1	0	0	0	0	0	0
Sox17	0	0	0	0	0	0
LOC108167609	0	0	0	0	0	0
Gm39586	0	0	0	0	0	0
LOC108167610	0	0	0	0	0	0
Gm29874	0	0	0	0	0	0
Mrpl15	13.4945	11.42	13.8224	11.9524	11.85	9.88664
Lypla1	53.3304	91.7524	67.8871	33.8064	43.972	37.1302
Gm39587	0	0	0.0626933	0	0	0
Tcea1	35.6818	34.5339	38.4579	45.6154	40.4322	38.6856
Rgs20	0	0	0	0	0	0
Gm16041	0	0	0	0	0	0
Atp6v1h	6.16872	7.31709	8.05507	8.75902	6.83939	7.09641
Oprk1	0	0	0	0	0	0
Npbwr1	0	0	0	0	0	0
LOC108167788	0	0	0	0	0	0
4732440D04Rik	2.69644	5.61281	3.14393	4.13571	5.23697	5.06054
Rb1cc1	18.0547	28.7073	21.9123	19.1523	19.5428	22.3332
Fam150a	0	0	0	0	0	0
LOC108167611	0	0	0	0.196301	0.177552	0
St18	0	0	0	0	0	0
Pcmtd1	82.6018	103.234	76.2164	81.8786	95.2177	108.075
Gm26901	0.733726	0.486963	1.88208	1.37544	0.995257	0.961727
Gm39589	0	0	0	0	0	0
Sntg1	0	0	0	0	0	0
Gm30719	0	0	0	0	0	0
Rrs1	121.12	69.9833	157.959	42.9763	51.8915	43.5791
Adhfe1	0.403207	0.0401403	0.103426	1.54194	1.43568	1.50623
2610203C22Rik	0	0	0	0.157961	0.142874	0.13806
3110035E14Rik	0	0	0	0	0	0
Mybl1	0.473926	0.923956	0.877981	0.555264	0.421873	0.601783
Vcpip1	168.764	179.613	285.93	122.607	128.933	138.469
1700034P13Rik	0.102041	0	0.0872486	0.688632	0.519049	0
Gm39590	1.26643	0.420256	0.240631	6.72648	6.22717	6.29404
Sgk3	12.0519	10.249	6.4392	15.6105	13.8931	15.9236
Mcmdc2	0.0119595	0.0452428	0.00818059	0.0833995	0.0535337	0.101109
Snhg6	17.4243	30.8937	15.3293	19.1122	18.3855	12.8822
Snord87	0.0746937	0.223079	0.510924	0	0	0.146856
Tcf24	0	0	0.155256	0.408465	0	0
Ppp1r42	0	0	0.238652	0.403633	0.527339	0.470375
Cops5	82.1199	77.7491	100.337	88.5656	92.1347	84.761
Cspp1	5.16227	3.86199	3.95684	3.2639	3.23184	3.88868
Arfgef1	87.3154	80.6357	106.03	47.2457	47.3725	48.162
Cpa6	0	0	0	0	0.0245735	0.00593642
Prex2	0	0	0	0	0	0
A830018L16Rik	0	0	0	0	0	0
Gm30898	0	0	0	0	0	0
Gm30974	0	0	0	0	0	0
Gm39591	0	0	0	0	0	0
Mir6341	0	0	0	0	0	0
Gm17644	0	0	0	0	0	0
Sulf1	0	0	0	0.54564	0	0
Slco5a1	0	0	0	0.849538	0.0768397	0.148502
Gm39592	0	0	0	0	0	0
Prdm14	0	0	0	0	0	0
Ncoa2	32.0024	37.2144	32.2426	15.8783	16.8063	17.8775
Gm39595	0	0	0	0	0	0
Tram1	233.79	260.1	255.432	234.199	219.454	214.95
Lactb2	15.3923	22.6787	21.536	10.7023	13.723	9.62912
Xkr9	2.40312	3.94038	3.38429	0.158996	0	0
Gm5523	0	0	0.022031	0	0	0.0253298
Gm31195	0	0	0	0	0	0
Gm39596	0	0	0	0	0	0
Eya1	0	0.0295882	0.0508249	0.234003	0.120945	0.262958
Msc	0	0	0	0	0	0
LOC105243866	0	0	0	0	0	0
Trpa1	0	0	0.381082	0	0.0566772	0
Kcnb2	0	0	0.113714	0	0	0
Terf1	10.3766	8.36597	11.0279	16.6437	15.4629	17.7795
Sbspon	0.23133	0.115148	0.247243	0	0	0.170558
Gm31523	0	0	0	0	0	0
Gm7634	0	0	0	0	0	0
4930444P10Rik	0	0	0.0346438	0	0	0
Rpl7	143.716	183.617	189.731	219.844	179.793	170.277
Rdh10	9.38328	8.79475	13.2721	5.44538	6.1439	5.93692
Stau2	0	0	0	0.0223868	0.0734011	0.0562534
LOC102634042	0	0	0	0	0	0
Ube2w	1.47809	1.68371	2.13876	1.83833	1.34466	1.18758
LOC108167614	0.662721	2.63903	0.708309	0	0.842758	0.162873
Tceb1	130.095	117.311	108.989	176.851	159.781	129.095
D030040B21Rik	0	0.0103815	0	0	0	0
Tmem70	8.09598	6.78544	7.8036	5.70296	5.61489	4.52688
Ly96	1.51584	1.16082	2.19338	4.85256	3.55871	3.3242
Jph1	0	0	0	0.0976764	0	0
LOC108167615	0	0	0	0	0	0
Gm31982	0	0	0	0	0	0
Gm28783	0	0	0	0	0	0
Gdap1	0	0	0	0	0	0
Gm28784	0	0	0	0	0	0
Gm39597	0	0	0	0	0	0
Pi15	0	0	0	0	0.0606562	0.0586127
Gm28154	0	0	0	0	0	0
Gm16070	0	0	0	0	0	0
Crispld1	0	0	0	0	0.194207	0
Gm28153	0	0	0	0	0	0
Crisp4	0	0	0	0	0	0
Defb44-ps	0	0	0	0	0	0
Defb18	0	0	0	0	0	0
Defb41	0	0	0	0	0	0
Gm15825	0	0	0	0	0	0
Tfap2d	0	0	0	0	0	0
Tfap2b	0	0	0	0	0	0
Gm32651	0	0	0	0	0	0
Pkhd1	0	0	0	0	0	0
4930486I03Rik	0	0	0	0	0	0
Linc-md1	0	0	0	0	0	0
Mir206	0	0	0	0	0	0
Mir133b	0	0	0	0	0	0
Il17a	0	0	0	0	0	0
Il17f	1.05743	0	0.361654	0.237871	0.645453	1.03951
Mcm3	345.771	269.328	386.529	511.647	484.83	499.251
6720483E21Rik	0.305979	0.304611	0.130811	0.172077	0	0
Paqr8	104.205	240.556	294.664	1.56534	2.12375	1.19712
Efhc1	0.142481	0.141843	0.121825	0	0.14495	0
Tram2	0.238097	0.711096	1.73043	0.267801	0.605558	0.819219
Tmem14a	2.74705	0.719674	3.21416	1.46357	1.1767	0.568527
Gm32947	0	0	0	0	0	0
Gm28836	0	0	0	0	0	0
Gsta3	0	0	0.069971	0	0	0
Gm4956	0	0	0	0.695209	0	0
Khdc1a	0	0	0	0	0.499895	0
Khdc1c	0	0	0	0	0	0
Gm33147	0	0	0	0	0	0
Khdc1b	0	0	0	0	0	0
Kcnq5	0	0.0662607	0	0.187155	0.135424	0.229007
Rims1	0	0.130786	6.90821	0	0	0
Gm7759	0	0	0	0	0	0
4933415F23Rik	0	0	0	0	0	0
Gm30442	0	0	0	0	0	0
Gm29506	0	0	0	0	0	0
Mir30a	0	0	0	0	0	0
Mir30c-2	0	0	0	0	0	0
Ogfrl1	3.50976	72.3004	10.6188	165.649	154.359	158.979
Gm19673	0.0443494	0	0	0	0	0.043598
Gm28822	0	0	0	0	0	0
B3gat2	0.480317	0.478169	0.182527	0.260116	0.343858	0.384738
Smap1	147.004	153.16	128.385	106.843	107.638	119.217
Gm26524	0.137049	0	0.234363	0	0	0.134727
Sdhaf4	12.0366	11.7479	10.6953	15.662	17.5275	13.6888
Fam135a	0	0.0849489	0.0729603	0.671834	0.260428	0.587193
Col9a1	0	0	0	0.27079	0	0
Col19a1	0	0	0	2.65299	2.3996	2.31876
Lmbrd1	80.3986	65.7551	77.8386	85.6989	87.832	99.7074
Gm29414	0	0	0	0	0	0
Adgrb3	0	0	0	0	0	0
Gm20172	0	0	0	0	0	0
LOC108167844	0	0	0	0	0	0
Gm39614	0	0	0	0	0	0
Gm31076	0	0	0	0	0	0
Gm31136	0	0	0	0	0	0
4931408C20Rik	0	0	0	0	0	0.01887
Gm5524	0	0	0	0	0	0
Gm7846	8.05791	9.273	10.9351	13.387	12.3339	11.0463
Gm597	0	0	0	0	0	0
LOC108167331	0	0	0	0	0	0
Mir6342	0	0	0	0	0	0
Gm31465	0	0	0	0	0	0
Gm31525	0	0	0	0	0	0
Gm39615	0	0	0	0	0	0
Gm31581	0	0	0	0	0	0
Phf3	232.177	324.345	266.549	166.252	173.923	187.45
Ptp4a1	65.0127	54.7077	62.9147	64.5332	70.3087	65.1931
Gm28644	0	0	0	0	0	0
Gm29669	0	0	0	0	0	0
4931428L18Rik	0	0	0	0	0.412508	0
Lgsn	0	0	0	0	0	0
Pih1d3	0	0	0	0	0	0
Gm4850	0	0	0	0	0	0
Khdrbs2	0	0	0	0	0	0
Gm9839	0	0	0	0	0	0
Gm5415	0	0	0	0	0	0
LOC108167822	0	0	0	0	0	0
Gm39616	0	0	0	0	0	0
Gm39617	0	0	0	0	0	0
Prim2	61.4691	54.1773	46.8818	123.711	106.475	106.111
Gm39618	0.833952	0	0.47537	0	0.282802	0.546548
1700001G17Rik	0.907321	0.903263	0.387894	2.29616	1.15381	2.11838
Gm32229	0	0.349757	0.300397	0	0	0
Rab23	5.2677	3.39898	5.50495	1.60923	1.38937	1.91794
Bag2	4.18369	4.12258	5.37387	2.5551	2.82141	2.13084
Zfp451	37.2305	50.9736	49.7532	19.8357	20.628	21.7756
Gm15455	22.8414	18.0601	16.4984	19.0133	15.6873	18.077
Bend6	0	0	0	2.25034	2.77556	1.96684
Gm38471	0	0	0	0	0	0
Dst	6.60354	18.0726	0.141662	2.95498	3.92484	4.76985
Mir6896	0	0	0	0	0	0
LOC108167617	0	0	0	0	0	0
Mir5103	0	3.54284	2.10659	0	0	0
Ccdc115	79.6991	118.639	125.972	70.6958	74.9418	48.9371
Imp4	9.56527	10.2141	13.0492	5.33724	5.71903	4.64382
Gm32504	0.0200591	0	0.0171512	0	0	0
Ptpn18	3.84733	2.90561	1.17215	6.76454	8.72778	8.21637
Gm32566	0.914049	0	0.39077	0	0.697418	0
4930568A12Rik	1.5299	0.571146	0.490542	0	0	0
Prss39	0.114377	0	0	0	0	0
Cfc1	0	0	0	0	0	0.0150142
Prss40	0	0	0	0	0	0
Amer3	0	0	0	0	0.237504	0
AA619741	0	0	0	0	0	0
Gm38647	0	0	0	0	0	0
Gm32920	0	0	0	0	0	0
LOC108167618	0	0	0	0	0	0
Gm32790	0.27032	0.538223	0.693397	0.304045	0.275005	0.26574
Arhgef4	0.69195	0.774963	0.813504	3.11311	2.28781	2.80594
Fam168b	23.8468	27.0328	32.4388	22.8414	25.936	24.3664
Plekhb2	1.45656	1.09655	1.12768	3.29286	3.33958	3.56189
1110002O04Rik	0.402154	0.0800712	0	0	0	0.158136
Gm33176	0	0	0	0	0	0
Gm39622	0	0	0	0	0	0
Gm33222	0	0	0	0.191046	0	0
Gm39623	0	0	0	0	0	0
Gm39624	0	0	0	0	0	0
Hs6st1	28.1452	22.0352	26.741	30.6017	30.587	34.2216
Gm33280	3.8203	1.92031	2.85951	1.5638	1.60557	1.72387
Uggt1	234.528	170.338	233.312	159.804	158.576	171.903
Mir6897	0.0348716	0	0	0	0	0
Gm39625	0	0	0	0	0	0
Neurl3	2.28405	12.3798	7.59474	100.762	84.1671	102.039
Arid5a	0.263711	1.92523	0.676444	8.79947	9.12156	11.9252
Kansl3	66.9753	80.032	94.2993	61.9046	61.258	64.0752
Mir6898	0	0	0	0	0	0
Fer1l5	4.10717	4.26657	5.64935	6.62809	4.17835	6.67078
Lman2l	27.4065	20.947	18.142	24.4617	25.7229	29.3756
Gm33401	0	0	0	0	0	0
Gm33454	0.387182	0	0	0.186637	0.168811	0.0543745
Cnnm4	1.17602	3.01053	1.29283	11.1488	14.5277	10.0745
Cnnm3	30.497	35.0159	22.5991	22.0675	18.0982	21.4859
Ankrd23	20.7419	25.3689	33.9498	5.1103	4.42124	4.07809
Ankrd39	22.2814	31.2115	36.4167	6.20986	11.8353	8.33511
Sema4c	3.92686	27.6257	18.131	3.82787	4.26124	4.37504
Fam178b	1.18411	3.12386	4.1384	0.016648	0.0451737	0.0291012
Cox5b	42.4027	22.1116	20.2859	64.1583	57.688	52.7671
Actr1b	8.87455	7.98672	11.9951	7.95345	8.82612	6.67226
4933424G06Rik	0	0	0	0	0.121245	0
Gm33533	0	0	0	0	0	0
Zap70	0.126149	0.125585	0.215724	1.1351	1.02669	1.61216
Tmem131	727.55	597.119	581.836	443.033	509.019	577.246
Vwa3b	0	0	0	0	0.16042	0.155015
Gm39626	0	0	0	0	0	0
Gm37020	0	0	0	0	0	0
Cnga3	0	0	0.110977	0.0729928	0.132042	0.127594
Inpp4a	2.77269	12.9734	3.08196	52.0808	62.0564	64.3269
4930439A04Rik	0	0	0	0	0	0
Coa5	132.842	115.361	134.292	70.7426	77.2403	68.0583
Unc50	8.81235	11.1656	11.3936	16.3995	17.2781	14.7009
Mgat4a	17.817	13.4559	7.5295	7.83167	6.59751	6.44235
4930594C11Rik	0	0	0.436037	0.286794	0.259402	0.250663
Gm39627	0	0	0	0	0	0
2010300C02Rik	0	0	0	0.914427	0	1.33204
LOC102637491	0	0	0	0	0	0
LOC102637336	0	0	0	0	0	0
Gm39628	0	0	0	0	0	0
Tsga10	0.0464644	0.0786362	0.0635656	0.141105	0.132355	0.0867866
Lipt1	14.6281	8.54343	20.679	5.92311	4.76211	5.17689
Mitd1	33.187	33.3445	36.915	36.809	39.8581	44.4059
Mrpl30	89.0619	78.9813	88.2975	95.0109	89.8272	71.5463
Lyg2	0	0	0	0	0	0
Lyg1	0	0	0	0	0	0
Txndc9	4.22826	5.12371	4.84633	5.37002	4.12476	4.80736
Eif5b	666.664	592.951	668.535	301.552	305.494	279.55
Gm34448	0	0	0.159553	0	0.189839	0
Rev1	76.0835	87.6416	82.9996	52.4601	56.7912	56.7406
Gm5099	0	0	0	0	0	0
Aff3	91.9541	90.7096	42.5325	8.33866	10.2185	12.1077
Gm16150	0.636705	0	0.326642	0	0	0
LOC108167619	0.671314	1.33662	0.573995	0	0.227649	0
Gm34596	0.169189	0	0.0723308	0.190297	0	0
Lonrf2	23.908	29.6161	69.9213	6.5699	4.14586	6.4099
Chst10	29.5969	24.5065	34.4311	113.792	99.4492	101.694
Nms	0	0	0	0	0	0
Gm35171	0	0	0	0	0	0
Pdcl3	46.8062	45.8602	47.7718	39.1201	41.2182	36.7378
Gm35222	0	0	0	0	0	0
Mir6349	0	0	0	0	0	0
Npas2	0	0	0	0.219772	0.198781	0
Rpl31	4.65634	6.74257	5.79101	10.5697	11.455	9.57103
Tbc1d8	3.8381	12.9487	1.21544	9.5932	12.5454	12.9263
Cnot11	53.0096	54.1961	60.9572	52.1558	53.7205	49.5009
Snord89	0.363157	0.994217	1.00916	0.102116	0.461814	0.357005
Rnf149	8.98122	11.5351	14.7422	16.1191	16.0177	17.4129
Creg2	0	0	0	1.03687	1.87568	0.679682
D930019O06Rik	0	0	0.212493	0.139763	0	0
Rfx8	0	0	0.107736	0	0	0
Gm3646	0	0	0	0	0	0
1700066B17Rik	0	0	0	0	0	0
Gm35600	0	0	0	0	0	0
Map4k4	0.888938	18.5842	5.06713	98.3177	113.344	104.865
Gm16894	0	0.272181	0	0	0.278142	0.134386
Il1r2	0	0.827822	0	0.974254	1.65666	1.36242
Gm35741	0	0	0	0	0	0
Il1r1	0.688414	0.166703	0.318171	3.34833	3.19887	3.07281
Il1rl2	3.43618	2.0905	2.12192	25.3364	26.8006	27.0237
Il1rl1	385.191	290.144	447.96	129.844	120.121	130.674
Il18r1	0	0.72551	0.519267	1.77599	3.83056	3.70151
Il18rap	0.0624538	2.86003	0.1068	9.27241	10.7376	10.4373
Gm35801	0	0	0	0	0	0
Slc9a4	0	0	0	0	0	0
Slc9a2	0	0	0	0.290225	0	0
Gm37915	9.55262	11.5848	6.08872	19.5353	19.4363	16.0497
Mfsd9	1.31146	1.66051	1.14311	1.3605	1.46372	1.37686
Tmem182	0.032757	0	0.00933608	0	0	0
4930448I06Rik	0	0	0	0	0	0
Gm39631	0	0	0	0	0	0
Gm35935	0	0	0	0	0	0
Gm29260	0	0	0	0	0	0
Gm28175	0	0	0	0	0	0
LOC108167620	0	0	0	0	0	0
Gm36678	0	0	0	0	0	0
LOC108167621	0	0	0	0	0	0
Gm36822	0	0	0	0	0	0
Gm30248	0	0	0	0	0	0
Pantr1	0	0	0	0	0	0
Gm42411	0	0	0	0	0	0
Pou3f3	0	0	0	0	0	0
2900092D14Rik	0	0	0	0	0	0
Pantr2	0	0	0	0	0	0
LOC108167622	0	0	0	0	0	0
Dalir	0	0	0	0	0	0
LOC108167623	0	0	0	0	0	0
Mrps9	43.7495	44.057	57.3454	34.9164	32.169	33.7111
Gm39633	0	0	0	0	0	0
Gpr45	0	0	0	0	0	0
Tgfbrap1	10.1297	12.5072	12.6262	5.32679	5.97234	6.36926
Gm28782	0	0	0.0237808	0	0	0
LOC108167597	0	0.00447659	0	0.0202308	0	0
AI597479	47.3454	40.719	54.0156	29.6195	25.508	24.3732
Fhl2	0	0.0158628	0	0.035844	0.0486307	0.0939847
Gm8210	1.58133	4.20708	2.61093	4.17055	5.46416	4.58321
Gm29040	0	0	0	0	0	0
Nck2	1.24163	0.272665	0.0624492	2.15642	2.02476	1.92064
Gm38628	0	0	0	0	0	0
Gm30634	0	0	0	0	0	0
1500015O10Rik	0.819173	1.08735	0	0.307124	0.55558	0
Uxs1	14.2346	16.8339	20.0127	20.0936	20.9929	18.6891
LOC102632770	2.47633	4.10875	3.05838	2.16632	1.39958	2.43437
Tpp2	32.6557	34.0348	34.5171	21.9774	21.6009	21.7187
Mettl21c	0	0	0.0857877	0	0	0.0986329
Ccdc168	1.08703	4.44893	5.06032	0.2717	0.614373	1.18735
Tex30	169.082	144.401	179.551	90.4224	79.4575	72.8431
Kdelc1	52.9285	36.7575	51.4763	25.7767	28.1256	19.132
Bivm	28.2119	27.3215	31.6705	12.3041	17.1815	13.7726
Ercc5	39.4899	50.7435	48.1933	42.8513	35.9268	34.8874
Mettl21e	0	0	0	0	0	0
Gm28893	0	0	0	0	0	0
Gm39635	0	0	0	0	0	0
Gulp1	0	0	0	0	0	0
4930521E06Rik	0	0	0	0	0	0
Col3a1	0	0	0	0.260128	0.256671	0.434042
Col5a2	0	0	0.0857877	0.789952	0.408287	0.69043
Gm39637	0	0.222309	4.77339	0.753503	0	0
Wdr75	34.0997	27.8016	48.7158	12.444	14.7082	11.428
Gm30900	0	0	0	0.0656461	0	0
Slc40a1	108.326	215.684	249.229	874.884	861.494	1048.1
Stk-ps2	0	0	0	0	0	0
Dnah7b	0	0	0.0336863	0	0	0
Gm31046	0	0	0	0	0	0
Dnah7c	0	0.0208173	0.0357587	0	0	0
Slc39a10	28.4594	24.4737	27.9317	5.41803	6.13976	6.8038
Gm39638	0	0	0	0	0	0
Gm39639	0	0	0	0	0	0
Mir6350	0	0	0	0	0	0
C230029F24Rik	0	0	0	0	0	0
Gm39640	0	0	0	0	0	0
Gm28321	0	0	0.472932	0	0	0
LOC108167624	0	0	0	0	0	0
Tmeff2	0	0	0	0	0	0
9330175M20Rik	0	0	0	0	0	0
Sdpr	0	0	0	7.51805	4.63635	2.38942
Nabp1	2.87768	3.41574	3.97467	7.0336	7.48779	6.47389
Gm17767	0	0	0	0	0	0
Gm31636	0	0	0	0	0	0
Myo1b	0	0	0	0.990319	0.559832	1.19014
Gm33795	0	0	0	0	0	0
Stat4	0	1.49826	0.14298	5.45443	5.95418	8.05502
Gm31812	1.09131	0.724286	0.466552	0.61373	0.555111	0.357607
Stat1	64.0062	57.3966	50.4452	93.699	123.769	118.639
Gls	22.4967	20.7361	21.9257	11.6874	12.4304	12.1783
Gm31867	0	0	0	0	0	0
Gm31955	0	0	0	0	0	0
Nab1	7.39395	31.6635	40.0397	26.4013	29.2526	27.2287
Gm553	0	0	0.5181	0	0	0.297838
Tmem194b	15.9733	12.4186	10.9261	22.4149	18.5716	18.9927
Gm28178	0.263389	0	0	0	0	0
Mfsd6	0.241834	4.33354	0.827101	11.9682	18.6979	18.5434
Inpp1	13.1534	1.74594	6.74794	12.8218	11.8202	8.62035
Hibch	76.8412	89.8447	85.3779	49.5159	54.9653	47.212
1700019D03Rik	0.558849	0.556349	0.238917	0.314285	0.568534	1.09876
Mstn	0	0	0	0	0	0
1700019A02Rik	0	0	0.10112	0.399059	0.360944	0
Pms1	15.1105	17.2475	20.5494	11.2816	11.198	11.333
Ormdl1	63.7113	72.1663	91.5784	120.468	109.727	101.099
Osgepl1	55.2638	71.7608	79.2103	122.815	96.147	98.4193
Asnsd1	136.733	170.11	147.991	264.407	237.425	225.753
Dnah7a	0	0	0.52548	0	0	0
Gm32311	0	0.808854	0	1.82771	1.03321	3.39457
Stk17b	9.80525	8.4945	15.9471	24.5444	24.7469	25.5744
Hecw2	0	0	0.231132	1.52023	2.75005	1.86018
Mir7681	0	0	0	0	0	0
Ccdc150	0	0.46018	0.153703	0.0288843	0.0261255	0.0252453
Gtf3c3	43.8956	46.3351	52.0684	30.4069	28.7785	33.2886
Gm34066	0	0	0	0	0	0
LOC108167366	0	0	0	0	0	0
Pgap1	0	0.0638949	0.0823164	4.87277	4.27678	6.4041
Ankrd44	8.2863	9.60158	6.27201	24.1406	28.7446	38.3258
4930444A19Rik	0	0	0	0	0	0.150611
Sf3b1	723.62	822.166	884.251	646.803	626.713	635.374
Coq10b	47.5088	26.8439	33.0932	48.0717	43.8535	44.3596
Hspd1	700.14	598.944	831.951	366.63	382.882	286.119
Hspe1	43.9963	34.8412	27.9008	34.391	39.2154	25.9566
Mob4	75.3792	71.664	76.886	79.6038	82.6035	78.391
Rftn2	0.194689	0.323031	1.05428	0.729928	0.528169	0.637968
Gm10561	0	0	0	0	0	0
Mars2	16.9524	10.5508	25.8221	3.24383	3.88815	3.25006
Boll	12.028	15.3113	17.8711	0	0	0.38768
LOC108167625	0	0	0	0	0	0
Plcl1	0	0.246557	0	2.2285	2.64554	3.65202
Gm6644	1.29939	1.27726	1.58417	0.866759	0.792313	0.809946
Gm39642	0	0	0	0	0	0
Gm32949	0	0	0	0	0	0
9130227L01Rik	0	0	0	0	0	0
1700003I22Rik	0	0	0	0	0	0
Hsfy2	0	0	0	0	0	0
Satb2	0.169321	0	0	1.90446	1.20579	0.998716
9130024F11Rik	0	0	0	0.268989	0.243297	0
Gm38484	0	0	0	0	0	0
LOC105243927	0	0	0	0	0	0
BC055402	0	0	0	0	0	0
4930558J18Rik	11.3839	8.45173	7.75389	5.42549	3.72954	6.44907
1700066M21Rik	15.2516	16.7712	26.4221	12.109	11.3581	12.2493
Tyw5	1.48463	1.86189	1.56616	1.34456	1.88305	1.28889
9430016H08Rik	8.1283	7.27906	7.36251	8.26572	7.9671	7.44329
Spats2l	0	0	0	0	0.0273838	0
Kctd18	3.78129	3.71902	4.14852	1.30666	1.25137	1.70186
Sgol2a	1.07244	1.21526	1.42116	1.9548	1.71196	1.83056
Aox1	1.54083	4.09049	0	0.577686	0.52251	0
Aox3	0	0.137221	0.0196426	0	0	0
Gm39643	0	0	0	0	0	0
Aox4	1.20176	0	0	2.70338	3.05646	6.79303
Aox2	0	0	0	0	0	0
Gm15759	0	0	0	0	0	0
Bzw1	965.532	942.729	1259.35	679.052	726.143	634.035
Clk1	283.836	307.715	192.452	433.538	375.382	396.498
Ppil3	2.9312	3.07078	3.29312	2.79852	2.87797	2.57998
Nif3l1	11.6321	11.476	14.8591	6.97252	7.40489	6.5734
Orc2	211.496	153.255	238.556	193.591	180.384	182.602
Gm15834	0.291626	0.551611	0.361556	0.0820022	0.103838	0.10034
Fam126b	40.4467	54.0111	46.9442	19.5491	22.309	26.5076
Ndufb3	28.4527	31.6374	31.6638	60.5586	56.0213	46.9907
Gm20257	1.00896	0.301334	1.29404	1.24832	1.33438	1.09105
Als2cr12	0	0	0	0.182244	0.109892	0.318569
Cflar	20.55	22.1728	19.8561	17.3019	18.1871	21.2528
Gm39646	0	0	0	0	0	0
Casp8	74.3601	64.5672	106.644	99.6699	92.8088	98.7904
Gm28802	0	0	0	0.0837226	0.075726	0.0731749
Trak2	850.768	1000.78	523.364	1352.78	1486.46	1686.3
Stradb	52.461	95.4307	32.8506	109.972	110.506	129.872
Als2cr11b	0.144291	0.143646	0	0.730319	0.146792	0.780157
Gm29018	0	0	0	0	0	0
Als2cr11	0	0	0.54089	0	0	0
Tmem237	5.20693	2.03643	12.6407	3.13743	3.87828	3.19919
Mpp4	0	0	0.915353	0	0	0
Als2	100.858	78.8687	195.325	40.0802	50.1702	54.7354
Gm33667	0.11177	0.11127	0.5734	0.125714	0.34112	0.109876
Cdk15	0	0	0	0	0	0
Gm33724	0	0	0	0	0	0
Gm33774	0	0.897788	0.154217	0	0	0
Fzd7	49.7805	207.836	80.3435	26.2594	34.5473	28.6415
Gm973	0.49704	3.83484	2.9749	0.279525	0	0.122155
Gm39649	0	0	0	0	0	0
Gm28411	0	0	0	0	0	0
Gm39648	0.27032	0.269111	0.346699	0.152023	0	0
Gm33833	0	0	0	0	0	0
Sumo1	89.3032	79.7431	110.795	115.206	104.509	91.2009
Nop58	1085.11	904.014	1411.04	482.193	552.514	430.815
Snord70	0.989521	0.886586	0.423036	0.111297	0.302001	0.291827
Snord11	0.149387	0.297439	0	0.168025	0.151976	0
Bmpr2	22.0532	14.8256	16.1469	7.41284	6.57589	7.4757
Fam117b	122.269	157.809	215.946	76.6986	69.2217	57.3966
Ica1l	3.6562	5.61143	15.5006	0.856738	0.464945	2.24641
Wdr12	75.4623	78.4448	128.068	39.9736	37.9973	30.8162
Carf	26.5182	28.9381	16.7874	15.7737	17.6393	19.0504
Nbeal1	2.05097	2.89617	2.22626	0.916195	1.13944	1.51574
Cyp20a1	49.7698	55.3439	77.5232	27.1319	29.3358	21.3969
Abi2	4.04467	3.4897	17.7527	7.27884	5.89783	9.54273
Raph1	0.0837405	0.375147	0.214802	2.07213	1.91682	2.63429
LOC102637269	0.675377	1.41195	0.692963	0.455782	0.137416	0
Gm11578	0	0	0	0.123412	0	0
Gm38388	0	0	0	0	0	0
Cd28	0	0.0491346	0.0422003	0.0185043	0.167369	0.0646921
2310016D23Rik	0	0	0	0	0	0
Gm38137	0	0	0	0	0	0
Gm39650	0	0	0	0	0	0
Ctla4	0	0	0.237685	0.62533	0.282802	0
Gm34649	0	0	0	0	0	0
Icos	0	0	0.208647	0.548932	0.620628	0.119944
LOC105243939	0	0	0	0	0	0
9530026F06Rik	0	0	0	1.29748	0.782367	1.13401
Pard3b	0	0.208902	0	0	1.17412	0.103142
Pard3bos1	0	0	0	0	0	0
Pard3bos2	0	0	0	0	0	0
Gm34881	0	0	0	0	0	0
Nrp2	0	0.557071	0.119613	12.5877	13.5202	13.0647
Gm29083	0	0	0	0	0	0
4930487H11Rik	0	0	0	0.0131136	0	0
Gm4208	0	0	0	0	0	0
Gm35120	0	0	0	0	0	0
Gm39652	0	0	0	0	0	0
Gm35252	0	0	0	0	0	0
Gm38513	0	0	0	0	0	0
Ino80d	290.218	254.784	272.134	90.8102	100.847	118.901
Ino80dos	12.4932	9.53527	11.0381	14.9886	7.20216	13.5097
Ndufs1	351.837	344.057	396.429	411.159	383.727	339.747
Eef1b2	413.016	633.777	475.355	992.211	894.766	759.084
Snora41	1.24414	1.33386	0.654636	0.32293	0.194724	0.282246
Gpr1	0	0	0	0	0	0
Zdbf2	0	0.0449834	0	0	0	0
1700039I01Rik	0	0	0	0	0	0
Gm11608	0	0	0	0	0	0
Gm35393	0	0	0	0	0	0
Adam23	0	0	0	0	0	0
Gm39653	0	0	0	0	0	0
Dytn	0	0	0	0	0	0
Mdh1b	0.152341	0	0.39077	0	0	0.14976
Fastkd2	75.4423	58.3185	105.396	34.6612	31.4985	31.8663
4933402D24Rik	0.936536	0	0.266923	0	0	0
Cpo	0	0	0	0	0	0
Gm13749	0	0	0	0	0	0
Klf7	53.2944	46.2805	84.5284	12.7153	16.4297	15.7628
Mir6899	0	0	0	0	0	0
Gm35880	0	0	0	0	0	0
Gm39654	0	0	0	0	0	0
Gm35803	0	0	0	0	0	0
Gm36148	0	0	0	0	0	0
Creb1	27.4351	17.4182	23.0791	21.1116	22.0524	23.4867
Mettl21a	1.9856	2.293	2.05994	2.62043	2.37015	3.17519
Gm29152	0	0	0	0	0	0
2810408I11Rik	1.78893	1.40991	1.84826	6.87474	6.29395	5.12932
Ccnyl1	0.164274	0.0700884	0.321051	0.765472	0.835606	0.715174
Fzd5	0.203633	0.337871	0.464301	5.57327	7.87217	8.14078
Plekhm3	0.103016	3.17922	7.83929	11.0075	12.3666	12.6588
Akr1cl	0	0	0	0	0	0
Cryge	0	0	0	0	0	0
Crygd	0	0	0	0	0	0
Crygc	0	0	0	0	0	0
Crygb	0	0	0	0	0	0
Cryga	0	0	0	0	0	0
D630023F18Rik	0	0	0.0182455	0.0240012	0.0108544	0.0104887
Gm36358	0	0	0	0.102954	0	0
Idh1	3.83069	6.73331	5.52717	20.9371	27.7667	28.8318
Pikfyve	153.49	141.299	135.546	117.648	97.9706	128.46
Pth2r	0	0.110016	0	0	0	0
Crygf	0	0	0	0	0	0
Map2	0	0	0	0	0	0.00255828
Unc80	0	0	0	0.0435051	0	0
Gm39655	0	0	0	0	0	0
Rpe	83.6674	81.9677	116.131	133.545	123.951	119.557
Kansl1l	2.23912	1.74543	3.35943	2.25712	1.76217	2.76186
LOC108167626	4.73852	5.39123	2.31519	1.77657	1.60688	4.43642
Gm39656	0.161356	0.196331	0.0766471	0.0403305	0	0.105748
Acadl	16.8983	22.6957	13.7953	36.1544	31.002	30.8134
Myl1	0	0	0.0399575	0	0.047542	0.0459404
Lancl1	67.8403	63.5295	68.3312	47.8065	34.2069	35.2659
Cps1	0	0	1.35079	0	0	0
Gm39658	0	0	0	0	0	0
Gm15669	0	0	0	0	0	0
Erbb4	0	0	0.0996993	0	0	0
Gm28497	0	0	0	0	0	0
Ikzf2	5.92935	5.20012	45.2659	3.17576	2.29795	3.3308
Gm29822	0	0	0	0	0	0
Spag16	0	0	0	0	0	0
Vwc2l	0	0	0	0	0	0
Gm29906	0	0	0	0	0	0
Bard1	32.1912	27.6364	31.8455	65.5625	65.4982	70.029
Abca12	0	0	0	0	0	0
Gm39659	0	0	0	0	0	0
Atic	402.759	327.478	504.299	164.775	172.282	152.054
Fn1	0.398234	21.6939	6.82368	8.72544	11.7651	13.1226
Apol7d	0	0	0	0	0	0
LOC108167627	0	0	0	0	0	0
Gm39660	0	0	0	0	0	0
Gm30160	0	0	0	0.268691	0.243028	0.23484
Gm30308	0	0	0	0	0	0
LOC108167354	0	0	0	0	0	0
Gm8883	0	0	0	0	0	0
Gm28818	0	0	0	0	0	0
4933417E11Rik	0	0	0	0	0	0
Gm4319	0	0	0	0	0	0
Mreg	0.0199922	0	0	0.056216	0.0508466	0.0393069
D230017M19Rik	4.48804	1.44128	2.72333	0.162838	0.147285	0.569291
Pecr	6.68371	7.31413	14.4833	3.04146	3.42573	2.95922
Tmem169	0	0	0	0	0	0
Xrcc5	16.3058	20.7379	23.1834	12.2828	11.376	9.22802
Gm39661	0	0	0.272041	0	0	0
2023-03-04	0	0	0	0	0	0
Smarcal1	39.5994	48.8931	43.8232	37.0496	34.1158	35.7721
Gm39662	0	0	0	0	0	0
Ankar	0	0.125439	0.215472	0	0.128186	0.123867
Rpl37a	3.63093	3.76689	2.71241	4.38485	4.82146	4.6966
Gm39663	0	0	0	0	0	0.044682
Gm30788	0	0	0	0	0	0
Gm30847	0	0	0	0	0	0
Igfbp2	0	0	0	0.207374	0	0.181248
Igfbp5	0	0	0.415227	2.51258	4.29818	2.19604
Gm31047	0	0	0	0	0	0
Gm31137	0	0	0	0	0	0
Tnp1	0	0	0	0	0	0
1700027A15Rik	0	0	0	0	0	0
Gm31254	0	0	0	0	0	0
Gm29185	0	0	0	0	0	0
Gm31197	0	0	0	0	0	0
Gm31344	0	0	0	0	0	0
Pinc	0	0	0	0	0	0
D530049I02Rik	0	0	0	0	0	0
LOC102633705	0	0	0	0	0	0
6030407O03Rik	0	0	0	0	0	0
Gm29183	0	0	0	0	0	0
Mir6351	0	0	0	0	0	0
Tns1	78.1695	88.2648	80.6386	70.0911	75.5949	84.5523
Gm39664	0	0	0	0	0	0
Gm31637	0	0	0	0	0	0
Rufy4	2.19601	1.84985	2.27485	0.569996	0.343703	0.498185
Cxcr2	0.192871	1.87742	0.274851	8.79786	9.50546	10.386
Cxcr1	0.941989	0	0.201358	0.529756	0.718736	1.85206
Mir1928	0	0	0	0	0	0
Gm31691	0	0	0	0	0	0
Arpc2	29.8665	34.3632	34.2025	24.5136	27.1645	26.4383
Gpbar1	0	0.379418	0	0	0	0
Aamp	261.539	191.296	275.741	254.298	226.271	220.135
LOC108167628	0.755571	0	1.13057	0	0.192166	0.185692
Pnkd	15.3178	14.8712	17.9681	23.9211	22.9242	14.0627
Tmbim1	7.34655	4.53061	4.28034	10.8225	10.9793	10.8651
Catip	0.0419354	0	0	0	0	0
Slc11a1	0	0.930809	0.17131	15.1736	16.3515	17.7264
Ctdsp1	65.4525	65.036	60.8196	61.9625	68.1893	66.7885
Mir26b	0	0.0736205	0.0948459	0.0415886	0	0.0363491
Vil1	0.235703	0.0469298	0.846441	0	0	0
Usp37	47.8283	41.1594	44.6504	38.3468	37.1668	40.6438
Cnot9	232.49	230.358	269.159	164.867	172.565	163.669
Plcd4	0.237834	0.568249	0.467718	0.267506	0.0967824	0.0701414
Zfp142	76.9125	48.6031	96.0751	48.9987	51.1958	49.914
Bcs1l	2.63044	2.33404	3.47146	1.58651	1.27984	1.37726
Rnf25	5.2184	5.64963	5.13118	8.29059	6.47015	6.7331
Stk36	0.287928	0.057328	0.098475	0.19431	0.0585836	0.28305
Ttll4	127.838	96.9899	164.941	65.0323	69.7936	69.3543
Cyp27a1	0	0.778083	0.297011	9.0839	9.80652	11.3543
Prkag3	0	0	0	0	0.176552	0
Wnt6	0	0	0	0	0	0.112439
Gm29539	0	0	0	0	0.278495	0
Gm32099	0	0	0	0	0	0
Wnt10a	0	0	0	0.488382	0.088347	0.0853707
Gm32275	0.00128541	0	0	0	0	0
Gm16582	0	0	0	0	0	0
Cdk5r2	0	0	0	0	0	0
Fev	0	0	0	0	0	0
Cryba2	0	0	0	0	0	0
Mir375	0	0	0	0	0	0
Ccdc108	0	0	0	0	0	0
Ihh	0	0.0693192	0.238145	0.156635	0.0708373	0.752959
Nhej1	0.335363	0.453711	0.286746	0.860795	0.822318	0.684721
Slc23a3	3.13364	1.61013	2.33364	2.50132	1.54255	1.98745
Cnppd1	176.465	175.187	156.546	161.323	148.826	147.992
Fam134a	16.0611	24.7423	16.39	25.8196	24.3897	23.2685
Zfand2b	37.2141	48.8736	44.493	62.1941	53.3663	61.386
Abcb6	21.3249	16.6152	17.4664	40.2558	40.3847	42.7171
Atg9a	109.083	135.033	64.858	122.999	124.413	144.185
Ankzf1	5.42456	7.84424	4.29962	3.65189	3.74619	4.55417
Glb1l	1.40929	1.20256	2.08865	1.43415	1.28352	1.46458
Stk16	88.8071	69.1571	111.801	88.4153	86.7245	86.6403
Tuba4a	330.996	159.744	248.41	292.585	280.28	286.878
A630095N17Rik	0.25025	0	0	0	0	0.123005
Dnajb2	10.8098	16.2618	9.8589	325.846	339.201	347.846
Ptprn	0.252792	0.167774	0	0.189553	0.257173	0.165672
Resp18	0	0	0	0	0	0
Dnpep	147.333	106.582	144.896	110.326	102.223	97.6028
Des	6.51217	0	19.1404	0.114447	0	0
Gm15179	0	0	0	0	0	0
Speg	0	0	0	0.396451	0.537878	0.346504
Gmppa	15.4203	17.15	14.9811	10.8223	9.4467	10.3263
Asic4	0	0	0	0	0	0.111143
Gm32506	0	0	0	0	0	0
Chpf	0	0.931674	1.40033	8.94724	12.8531	6.67002
Tmem198	0	0	0	0.178797	0.16172	0.156272
Obsl1	0	0	0	0	0	0
Inha	0	0	0	0	0	0
Stk11ip	28.2672	36.0997	37.0474	20.1521	17.9368	23.6481
Slc4a3	0	0	0	0	0	0
Gm32622	0	0	0	0	0	0
Gm29065	0	0	0	0	0	0
Gm32737	0	0	0	0	0	0
Gm17751	0	0	0	0	0	0
Mir6343	0	0	0	0	0	0
Epha4	0.363566	2.8553	0.03454	0	0	0
Mir6352	0	0	0	0	0	0
Gm32793	0	0	0	0	0	0
Gm32974	0	0	0	0	0	0
Gm33083	0	0	0	0	0	0
Gm33030	0	0	0	0	0	0
Pax3	0	0	0	0	0	0
Gm33152	0	0	0	0	0	0
Gm2102	0	0	0	0	0	0
Sgpp2	0.0598213	0.119108	0	0.0672846	0.060858	0.117615
Farsb	25.4228	18.0491	28.7621	24.3583	22.1821	17.6959
Mogat1	0	0	0	0.242083	0.191591	0.185137
Gm39665	0	0	0	0	0	0
LOC108167629	0	0	0	0	0	0
Utp14b	1.65088	1.74311	0.128323	0.506413	1.01788	1.4262
Acsl3	0.0956476	0.156612	0.00215215	0.172695	0.174125	0.152175
Gm38631	0	0	0	0	0	0
Gm33693	0	0	0	0	0	0
Gm29536	0	0	0	0	0	0
Kcne4	0	0	0	0	0	0
Scg2	0	0	0	0	0	0
Ap1s3	3.67697	2.20794	7.18612	2.49455	3.02818	2.18028
Wdfy1	19.5252	8.50406	32.9077	12.9866	12.9877	13.5652
Mrpl44	8.61436	8.30969	9.88	7.81809	6.98071	7.44636
Gm39666	0	0	0	0	0	0.00822005
Serpine2	0.0607307	0.362755	0.415414	5.87444	4.38661	2.56718
Gm33970	0	0	0	0	0.0880634	0
Fam124b	0	0	0	0	0	0.0617533
LOC108167342	0	0	0	0	0	0
2310015K22Rik	0	0	0	0	0	0
Gm34098	0	0	0	0	0	0
Cul3	168.567	180.482	181.411	147.36	146.869	141.511
Gm39667	0	0.0218287	0.0187481	0.0493247	0.0223068	0
Gm38673	0	0	0	0	0	0
1700016L21Rik	0	0	0	0	0	0
Dock10	0.903399	0.176923	3.27064	0.613947	0.701668	0.682188
Nyap2	0	0	0	0.0417604	0.0377718	0
Mir6344	0	0	0	0	0	0
Irs1	0	0	0.243973	0.802342	0.435425	0.981763
Rhbdd1	12.4184	16.1463	19.7716	11.0778	11.1088	10.5767
LOC108167630	0	0	0	0	0	0
Col4a4	0.158556	0.591926	0.271141	0.0445844	0.040326	0.116902
Col4a3	1.87095	3.02041	1.98884	0.170625	0	0.0497095
LOC105243964	0.460088	0.785195	0.337191	0.0739269	0.066866	0.0646133
Mff	5.12115	6.49741	4.52315	3.14802	3.02837	3.05087
Gm39668	1.10934	1.59381	0.506595	0.184325	0.230842	0.285028
Tm4sf20	0.071429	0	0	0.160681	0.0726669	0.0702188
Gm34286	0	0	0.0893622	0	0	0.102743
Gm17764	0	0	0	0	0	0
Gm34450	0	0.061498	0	0.138962	0	0
LOC108167631	0	0	0	0.00870134	0	0
Agfg1	60.0981	51.6013	60.4212	45.0197	50.0288	50.3746
Slc19a3	0	0	0	0	0	0
Krtap28-13	0	0	0	0	0	0
Ccl20	0	0	0	0	0	0
Daw1	0	0	0	0	0	0
Sphkap	0	0	0	0	0	0
Pid1	0.0780447	0.233087	0.266923	9.83153	7.30455	9.12997
Mir6353	0	0	0	0	0	0
Dner	0	0	0	0	0	0
Mir5126	0	0	0	0	0	0
Trip12	364.314	313.223	281.145	194.875	205.577	216.501
Fbxo36	3.5879	2.47282	2.6902	2.17297	1.90927	1.19379
Slc16a14	0	0.468888	0.805431	0	0.479157	1.85206
Gm39669	0	0	0	0	0	0
Gm15433	0	0.0697696	0	0.23648	0.499083	0.757852
A530032D15Rik	0.262428	0.130627	0	0.147584	0.467208	0.451467
A530040E14Rik	0.195749	0.194874	0	2.20171	1.59313	1.05838
Gm35498	0	0.00466464	0.0160253	0.063242	0.071502	0.0783056
Gm38510	0	0	0	0	0	0
LOC102638435	0.0866327	0.0862453	0.296295	0.194882	0.264402	0.51099
Gm7609	0.139261	0	0	0.0783177	0.212512	0.273803
C130026I21Rik	0.0290581	0.214068	0.00496912	0.03922	0.0945974	0.0628447
LOC108167347	0.0212877	0.0282567	0.0182017	0.0399059	0.0216567	0.0418541
LOC101055758	0.0351901	0.0350328	0	0.0395804	0.0358	0.242157
LOC105243968	0	0	0	0	0	0
Gm2666	0	0	0	0	0.0642806	0
Gm2427	0.180742	0.359867	0.038635	0.152468	0.229843	0.2221
Sp110	36.8005	24.9867	20.5179	26.609	27.4318	26.7577
Sp140	14.0123	11.38	4.72932	24.2628	26.8222	23.7436
LOC102634459	0	0	0	0.0909401	0	0.158966
Sp100	93.0699	70.6878	35.9254	71.1515	78.8029	87.801
A630001G21Rik	5.38334	3.23077	2.21985	6.57028	5.51548	6.45565
Mir8096	0	0	0	0	0	0
9930111H07Rik	0	0	0	0	0	0
Cab39	140.614	146.641	153.549	90.3968	87.7404	91.7558
Itm2c	0.619201	0.639263	0.935873	1.61099	2.04039	1.9409
Gm32302	0	0	0	0.0596724	0	0
4933407L21Rik	0	0	0.596262	0	0	0
Gpr55	0	0.0134962	0	0.0304962	0.110334	0.133271
Gm41905	0	0	0	0	0	0.00486155
Spata3	0	0	0	0	0	0
2810459M11Rik	0	0	0	0	0	0
Psmd1	122.92	125.154	124.722	113.289	121.273	106.235
Htr2b	2.76186	2.02595	1.74003	0.163496	0.14788	1.14318
Armc9	34.3956	20.8198	26.3232	49.6719	45.6836	47.2753
LOC108167633	0.903331	0.359717	0.617902	0.203206	0.367595	0.177605
Gm16341	0	0	0.0482938	0	0	0
Gm28626	0	0.125732	0	0	0	0
B3gnt7	0.0410574	0.0136246	0.0117018	0.338651	0.194922	0.363256
Ncl	631.382	624.794	937.283	419.344	452.443	344.634
Snora75	0.421084	0.29943	0.514344	0.338299	0.122395	0
Gm24148	0.113894	0.22677	0.292149	0.128104	0	0.186607
Snord82	0.0219357	0	0	0	0	0
C130036L24Rik	1.09629	2.09882	2.66787	1.89701	1.9732	1.74092
Nmur1	0	0	0	0	0	0
1700019O17Rik	0	0	0	0	0	0
Gm32700	0	0.036697	0	0	0	0.108712
Gm32758	0	0	0	0	0	0
Gm41907	0	0	0	0	0	0
Ptma	107.068	102.51	92.863	128.995	114.686	97.1451
Pde6d	44.2987	64.6444	71.2837	99.3413	113.926	98.7272
Cops7b	3.78136	3.81659	5.0692	2.89825	3.28211	2.66698
Gm41908	0	0	0	0	0	0
Nppc	0	0	0	0	0	0
Dis3l2	51.2842	53.8022	56.041	33.8852	33.4562	29.9553
Gm41909	0	0	0	0	0	0
Gm28375	0	0	0	0	0	0
Gm41910	0	0	0	0	0	0
Gm29371	0	0	0	0	0	0
Alppl2	0	0	0	0	0	0
Alpi	0	0	0	0	0	0
Akp3	0	0.0107161	0	0	0	0
Ecel1	0	0	0	0	0	0
Gm33292	0	0	0	0	0	0
Prss56	0	0	0	0	0	0
Chrnd	0	0	0	0	0	0
Chrng	0	0	0	0	0	0.012292
Eif4e2	25.1307	21.8083	26.0755	22.4246	22.2108	18.7525
Efhd1	0	0	0	0.53774	0	0
Gm41911	0	0	0	0	0	0
Gigyf2	42.1034	37.2188	43.5728	18.8414	23.8324	23.5974
Kcnj13	0.703115	0	0.240474	0.158167	0	0.13824
3110079O15Rik	0	0.0224776	0	0	0	0.022196
Ngef	0	0	0	0	0	0
LOC108167634	0	0	0	0	0	0
Neu2	0	0	0	0	0	0
Inpp5d	7.83085	22.2303	1.8134	22.2031	22.7587	26.8033
Gm33470	0	0	0	0	0	0
Gm33517	0	0	0	0.0406548	0	0
Atg16l1	1.64929	2.05173	1.67245	1.12877	1.02643	1.16642
Scarna6	0.0252181	0.0125527	0	0	0.0128276	0.0371862
Sag	0.118865	0.0354999	0.172776	0.106955	0.0241849	0.0934806
Gm38609	0.143301	0.14266	0	0	0.194379	0.187831
Dgkd	3.12286	3.0397	3.44062	1.60267	1.97488	1.80097
Gm19582	0.0568271	0.113146	0	0.0639168	0	0.0558643
Usp40	12.0351	10.3534	15.9948	4.48766	4.79099	3.47219
Ugt1a10	0	0	0	0	0	0
Ugt1a9	0	0	0	0	0	0
Ugt1a7c	0	0.102221	0.0184832	0.322159	0.406844	0.605645
Ugt1a6b	0	0	0	0	0	0
Ugt1a6a	0	0	0	0.0353479	0	0.0617893
Ugt1a5	0	0	0	0	0	0
Ugt1a2	0	0	0	0.0294881	0.0266716	0.0257731
Dnajb3	6.77134	7.54357	5.92756	19.947	16.2376	19.3359
Ugt1a1	0	0.0442238	0	0.0499646	0.0903847	0.305689
Mroh2a	0	0.0876534	0	0.198064	0.13436	0.302944
Hjurp	538.897	789.239	445.209	783.587	710.338	808.602
Trpm8	0	0	0	0	0	0
Spp2	0	0	0	0	0	0
Gm29538	0	0	0	0	0	0
Gm28888	0	0	0	0	0	0
Glrp1	0.0881911	0	0.113109	0.0991938	0.314018	0.130045
Gm19589	0.0679633	0	0	0.0382212	0	0
Gm41912	0	0	0	0	0	0
Arl4c	0	0.639485	0.149792	6.4368	7.72307	7.92214
Platr5	0	0	0	0	0	0
Gm34194	0	0	0	0	0	0
1700067G17Rik	0	0	0	0	0	0
Sh3bp4	0	0.107375	0	0.60657	1.207	0.636182
Gm34331	0	0	0	0	0	0
C030007H22Rik	0	0	0	0	0	0
Gm41913	0	0	0	0	0	0
Agap1	0	1.03027	0.153812	1.22352	1.3521	1.47923
Gm28499	0	0	0	0	0.0168319	0.0325296
Gm41914	0	0	0	0.622123	0.562703	0.699101
4933400F21Rik	0	0	0	0	0	0
Gbx2	0	0	0	0.24674	0.223174	0.071885
LOC102637806	0	0	0	0	0.42475	0.136813
Asb18	0	0	0	0	0	0
Gm41915	0	0	0	0	0	0
Gm34616	0	0	0	0	0	0
Iqca	0	0	0	0	0	0
4930434B07Rik	0	0	0	0	0	0
Ackr3	0	0	0	0.143601	0.0519541	0.0502038
Gm34930	0	0	0	0.30268	0.54754	0.634912
LOC102638195	0	0	0	0.241902	0.437595	0.634279
Gm34992	0	0	0	0	0	0
Gm28722	0	0	0	0	0	0
Gm35048	0	0	0	0	0	0
LOC108167648	0	0	0	0	0	0
Gm41917	0	0	0	0	0	0
Gm35192	0	0	0	0	0	0
Cops8	9.08007	9.18269	12.042	9.20599	9.17238	7.559
Gm35242	0	0	0	0	0	0
Gm9991	0	0	0	0	0	0
Gm35332	0	0	0	0	0	0
Gm41918	0	0	0	0	0	0
Col6a3	0	0	0	0.210159	0.237607	0.275523
Gm35381	0	0	0	0	0	0
Mlph	0	0	0	0.0824518	0.0248589	0.0480428
Prlh	0	0	0	0.0357859	0	0
Rab17	0	0	0	0.117666	0	0.137123
Lrrfip1	0.0442548	0.519871	0.0605428	2.21005	2.75533	3.28898
Rbm44	0.0329639	0.131266	10.8231	1.77967	1.77736	2.98129
Ramp1	0.204004	0.138472	0.114965	0.396332	0.476397	0.428442
Ube2f	22.4526	19.3813	14.2768	15.9834	21.6852	23.6089
Scly	24.5804	25.1911	19.8598	38.8332	35.2202	35.7663
Espnl	2.09488	0.676381	7.8909	0	0	0
Klhl30	0	0	0	0	0	0
Fam132b	5.17717	2.14751	0.922218	2.79022	4.93772	4.02915
Ilkap	30.7459	28.868	27.4911	31.9315	29.6936	30.1129
1700020N18Rik	0	0	0	0	0	0
Hes6	1.8903	1.4504	1.71088	1.61794	1.79173	1.57727
Per2	6.01437	3.48744	4.85378	1.37668	1.84632	2.07455
Gm35591	0	0	0.227708	0	0	0
Gm28382	0	0	0	0	0	0
Traf3ip1	23.5666	13.9029	24.3082	15.0065	16.9982	13.9739
Asb1	91.5019	48.9995	57.8443	54.2781	60.4787	69.8904
Gm28380	0	0	0	0	0	0.269455
Twist2	0	0	0	0	0	0
LOC108167658	0	0	0	0	0	0
LOC108167833	0	0	0	0	0	0
Hdac4	41.2017	35.2191	36.7043	16.2561	18.3244	15.1623
LOC108167659	0	0	0	0	0	0
Gm35992	0	0	0	0	0	0
Ndufa10	229.721	220.681	272.949	244.801	228.462	202.249
Mir6900	0	0	0	0	0	0
Olfr1416	0	0	0	0	0	0
Olfr1415	0	0	0	0	0	0
Olfr1414	0	0	0	0	0	0
Olfr1413	0	0	0	0	0	0
Olfr1412	0	0	0	0	0	0
Olfr1411	0	0	0	0	0	0
Olfr1410	0	0	0	0	0	0
Olfr12	0	0	0	0	0	0
Myeov2	10.4008	8.97597	9.81697	20.0924	18.5512	15.9344
Otos	0	0	0.284197	0.186925	0.338142	0
Gm29483	0	0	0	0	0	0
Gm36102	0	0	0	0	0	0
Gpc1	0.112822	2.24635	0.578798	14.9739	14.8063	19.7421
Mir149	0	0	0	0	0	0
Ankmy1	0.309048	0.307666	0.264246	0	0.471606	0.455718
Gm36184	0.0106737	0	0	0	0	0.0314786
Dusp28	2.1927	2.09098	2.34847	2.67395	2.79425	2.35976
5033417F24Rik	1.51912	0.465332	0.999153	0.262869	0.356643	0.919006
Rnpepl1	87.6556	75.8192	82.5371	54.0019	58.3892	62.7374
9430060I03Rik	0.0543501	0	0	0	0.027646	0.0534293
Capn10	40.5668	40.5768	41.0971	76.3349	54.3745	62.1818
Gpr35	0.0634457	0.442134	0.162744	1.99811	3.09817	1.99587
Gm36424	0	0	0	0	0	0
Aqp12	0	0	0	0.0300357	0	0.0262516
Kif1a	0	0	0	0.940419	0.255179	0.904135
Gm36472	0	0	0	0	0	0
Agxt	0	0	0	0	0	0
2310007B03Rik	0	0	0	0	0	0
Crocc2	0	0	0	0	0	0
Sned1	0.530448	0.528076	0.604733	0.795502	1.7988	1.21674
Mir6901	0	0	0	0	0	0
Mterf4	4.98502	6.3162	7.25657	5.46794	5.53246	3.68555
Gm28535	1.71505	1.51767	0.977616	2.14336	0.775456	2.99732
Pask	1.60826	1.73986	1.67312	2.61535	2.74039	2.96133
Ppp1r7	89.5032	71.5181	85.8093	82.7999	79.1079	78.2859
Mir6902	0	0	0	0.102375	0	0
Mir6345	0	0	0.174332	0	0	0
Ano7	0.963016	0.599193	0.411705	0	0.122463	0
Hdlbp	615.889	684.398	613.547	496.975	515.462	528.634
2023-09-02	227.799	212.434	256.69	140.644	140.505	128.996
Farp2	11.9357	6.95549	10.2054	0.818583	0.740398	2.28945
Gm41920	0	0.123278	0	0	0	0
Stk25	94.2424	95.1083	67.8331	92.7394	88.3697	84.271
Bok	0	0	0.080684	0.0530683	0.0479996	0.139147
Thap4	35.1345	43.9789	40.6439	28.0403	30.7499	34.7932
Atg4b	82.4539	86.5651	59.2057	126.294	121.911	113.808
Dtymk	41.825	48.935	51.5123	71.9929	73.0641	68.2956
Ing5	150.402	121.294	190.421	132.771	140.41	131.163
D2hgdh	25.468	26.6394	19.8693	17.2929	14.4472	17.7679
Gal3st2	0	0	0	0	0	0
Gm30204	0	0	0	0	0.0736918	0
Gm9994	0	0	0	0	0	0
Gm7889	0.608428	1.10129	0.378346	0.373274	0.675243	0.489371
Gm6086	0	0.0661179	0	0	0	0
Neu4	0	0	0	0	0	0
Pdcd1	0	0.0706417	0	0.159624	0.144378	0.139514
4930440C22Rik	0	0	0	0	0	0
Fam174a	4.58787	4.53899	5.43341	6.92307	7.16052	5.88279
St8sia4	59.2535	26.64	100.86	49.7541	55.2802	62.5445
Gm30431	0.0343005	0	0.0586559	0.0192899	0.0174475	0
4930598F16Rik	0	0	0.114704	0	0	0
1700063A18Rik	0	0	0	0	0	0
Gm29601	0	0	0	0	0	0
Gm30490	0	0	0	0	0	0
4930533P14Rik	0	0	0	0	0	0
Slco4c1	0	0.194107	0.0196133	0.554711	0.711756	0.834352
Panct2	0	0.0381237	0	0.279972	0.370107	0.338815
Slco6b1	0	0	0	0	0	0
Slco6c1	0	0	0	0	0	0
Gm7133	0	0	0	0	0	0
Gm7135	0	0	0	0	0	0
LOC105246668	0.161787	0.375814	0.138333	0.485256	0.329181	0.530152
D1Ertd622e	112.032	133.305	86.226	223.849	209.602	227.325
Ppip5k2	46.9411	41.2084	53.0435	22.4389	21.6524	23.6497
Gin1	13.5798	16.7046	13.9467	16.9418	14.2121	9.89719
Pam	0	0.40519	0.0773349	1.88202	1.97831	2.53406
Gm31771	0	0	0	0	0	0
B230216N24Rik	0	0.0262789	0	0.0296902	0.0537088	0.0259497
1810006J02Rik	0	0	0	0.067925	0.245749	0.178103
Gm29461	0	0	0	0	0	0
Slco6d1	0	0	0	0	0	0
Gm7967	0	0	0	0	0	0
Cntnap5b	0	0	0	0	0	0
Gm41923	0	0	0	0	0	0
Gm20268	0	0	0	0	0	0
Gm31973	0	0	0	0	0	0
Gm41924	0	0	0	0	0	0
Cdh20	0	0	0	0	0	0
Gm41925	0	0	0	0	0	0
Gm29012	0	0	0	0	0	0
Rnf152	0	0.104705	0.31475	0.118297	0	0
Gm17634	0	0	0	0	0	0
Gm28403	0.013646	0	0	0	0	0
Pign	11.4236	11.2296	11.2055	5.30562	5.21615	5.10091
2310035C23Rik	26.4924	31.9519	28.9528	28.1536	24.4733	26.5226
Tnfrsf11a	0	0.194286	0.111245	2.63408	2.77957	2.74988
Gm41926	0	0	0	0	0	0.0226126
Gm41927	0	0	0	0	0	0
Gm7160	0.608678	0	0.312263	0.41077	0.371536	0.478692
Zcchc2	60.646	44.2303	58.7463	16.6213	19.5244	21.4136
Gm26509	0	0	0	0	0	0
Gm20753	0	0	0	0	0	0
Phlpp1	25.7551	14.3167	34.0941	16.7634	15.0293	16.7078
Gm41928	0	0	0	0	0	0
Bcl2	2.02983	0.59704	3.31336	1.08965	1.26716	1.22447
Mir3473f	0	0	0	0	0	0
Gm37053	0	0	0	0	0	0
Kdsr	54.4939	47.5002	80.627	8.75608	12.7738	12.22
Vps4b	156.429	201.773	221.088	98.417	100.462	97.0775
Serpinb5	0	0.374783	3.5408	0	0	0
Serpinb12	0	0	0.503257	0	0	0
Serpinb13	0	0	0	0	0	0
Serpinb3a	0	0	0	0	0	0
Serpinb3d	0	0	0	0	0	0
Serpinb3b	0	0	0	0	0	0
Serpinb3c	0	0	0	0	0	0
Serpinb11	0	0	0	0	0	0
Serpinb7	0	0	0	0	0.0387591	0
Serpinb2	8.5722	0.648141	8.99951	0.122046	0.331168	0.10667
Serpinb10	2.37653	4.36781	24.0715	8.01906	12.2745	7.54792
Serpinb8	0	0.0168247	0.00722515	0.0570263	0.0171932	0.0498419
Gm15389	0	0	0	0	0	0
D830032E09Rik	0	0	0	0	0	0
Gm28282	0	0	0	0	0	0
Gm41929	0	0	0	0	0	0
Cdh7	0	0	0	0	0	0
Gm41930	0	0	0	0	0	0
Cdh19	0	0.211369	0.272308	0	0	0
LOC102635409	0	0	0	0	0	0
Dsel	0.1001	0.199305	0.68471	0.506648	0.712844	0.344414
Gm32810	0	0	0	0	0	0
Gm41931	0	0	0	0	0	0
Gm41932	0	0	0	0	0	0
LOC108167836	0	0	0	0	0	0
Gm32985	0	0	0	0	0	0
Gm41933	0	0	0	0	0	0
Gm33042	0	0	0	0	0	0
LOC108167704	0	0	0	0	0	0
Cntnap5a	0	0	0	0	0	0
LOC108167601	0	0	0	0	0	0
B020011L13Rik	0	0	0	0	0	0
Tsn	209.733	179.526	193.067	196.486	187.631	185.763
Nifk	88.3492	68.9792	62.6316	43.6327	49.2745	38.797
Gm28867	0	0	0	0	0	0
Clasp1	18.8755	18.3756	14.2886	11.2498	12.8017	12.2793
2900060B14Rik	1.12157	0	0.15983	0	0.570504	0.551284
Tfcp2l1	0	0.148514	0.510217	0	0	0
Gli2	0	0	0	0	0	0
Mir6346	0	0	0	0	0	0
Gm41934	0	0	0	0	0	0
LOC108167707	0	0	0	0	0	0
Gm33388	0	0	0	0	0	0
Inhbb	0	0	0	0.140247	0.126852	0.122578
Gm41935	0	0	0	0	0	0
Gm33490	0	0	0	0	0	0
Gm33575	0	0	0	0	0	0
LOC108167708	0	0	0	0	0	0
Ralb	5.89429	5.10586	1.17814	14.3786	17.4442	16.706
Tmem185b	2.37154	2.64425	0.68364	1.08221	1.1305	1.29224
3830432H09Rik	0	0.219881	0	0	0	0
Epb41l5	2.26813	7.66103	2.63194	1.18444	0.947699	1.4732
Ptpn4	36.2443	39.2766	38.0984	8.36649	10.3866	11.0403
Gm28209	0.351901	0	0	0	0	0
Tmem177	8.97503	10.9727	9.78314	5.13592	5.5531	4.95324
Cfap221	0	0	0	0	0	0
Gm33817	0	0	0	0	0	0
Sctr	0	0	0	0	0	0
Gm33764	0	0	0	0	0	0
Gm41936	0	0	0	0	0	0
Tmem37	0	0	0	1.46482	2.22827	1.97861
Gm41937	0	0	0	0	0	0
Gm41938	0	0	0	0	0	0
Dbi	12.5074	12.7933	12.9169	19.1984	16.4665	15.1403
3110009E18Rik	0.593712	0.861959	0.35958	0.779081	0.805336	0.316146
Steap3	455.356	298.894	363.019	513.489	513.323	482.535
C1ql2	0	0	0	0	0	0
LOC108167722	0	0	0.111379	0	0	0
Marco	0	0	0	4.65739	10.9326	4.55523
Gm41939	0	0	0	0	0	0
En1	0	0	0	0	0	0
Gm34352	0	0	0	0	0	0
2610027F03Rik	0	0	0	0	0	0
Gm29345	0	0	0	0	0	0
Gm34584	0	0	0	0	0	0
Gm34641	0	0	0	0	0	0
Gm34698	0	0	0	0	0	0
Celrr	0	0	0	0	0	0
LOC108167723	0	0	0	0	0	0
Gm41940	0	0	0	0	0	0
Insig2	1.30853	1.04653	1.18169	1.44697	1.10684	1.06233
LOC108167603	0	0	0	0	0	0
2210011K15Rik	0	0	0	0	0	0
Gm35243	0	0	0	0	0.0212732	0
Ccdc93	83.825	62.5516	77.2435	18.4007	26.2167	26.3297
Htr5b	29.053	6.33081	14.4996	0	0	0
Ddx18	5.13336	4.31925	6.13384	1.7877	2.00298	1.64694
Gm28590	0	0	0	0	0	0
Dpp10	0	0	0	0	0	0
Gm41941	0	0	0	0	0	0
Gm35355	0	0	0	0	0	0
Actr3	145.24	183.094	174.965	200.946	206.284	213.89
Slc35f5	0.781578	0.0864536	0.371263	4.00473	5.65421	5.54909
Gpr39	0	0	0	0	0	0
Gm41943	0	0	0	0	0	0
Lypd1	0	0	0	0	0	0
Nckap5	0.587781	0	0	0	0	0
Gm35562	0	0	0	0	0	0
LOC102639337	0	0	0	0	0	0
Gm41945	0	0	0	0	0	0
Mgat5	72.1681	133.287	118.86	51.6749	50.5507	56.7951
Gm8451	12.9848	18.5561	13.6094	19.316	16.8319	16.059
Gm41947	0	0	0	0	0	0
Tmem163	0	0	0.370369	2.43603	8.37275	4.68407
Gm35993	0	0	0	0	0	0
Acmsd	9.18174	5.94695	4.44556	24.2628	20.9325	19.0311
2900009J06Rik	0.0983207	0	0	0	0	0.0483274
Ccnt2	73.2159	61.2375	60.7607	48.4414	46.1958	50.8062
Map3k19	0.0905607	0	0.464594	0.305577	0	0.0890263
Rab3gap1	46.8609	51.7175	51.1873	28.0628	30.5596	28.9742
Zranb3	28.3648	21.4751	17.1706	19.8392	18.6112	23.5493
Gm28800	0.613145	0.277456	0.0953197	0	0.453652	0.493164
R3hdm1	531.034	546.464	589.561	207.348	207.698	246.683
Mir128-1	0	0	0	0	0	0
Ubxn4	29.4638	26.6362	31.7745	14.9033	16.148	14.4153
Gm41949	2.6566	1.28458	1.81718	0.256117	0.617745	0.4477
Lct	0.00929087	0.0184987	0.015888	0.0418	0.0661633	0.0639342
Mcm6	348.638	321.318	313.822	539.42	499.704	505.398
Dars	296.35	315.204	282.232	238.468	234.957	202.316
Gm41950	0	0	0	0.100927	0	0
Cxcr4	64.5497	61.9	82.9644	175.012	168.577	182.461
Thsd7b	0	0	0.0329011	0.432801	0.0391463	0.378275
Gm36347	0.134486	0	0.22998	0	0.136817	0
Gm41951	0	0	0.466552	0	0	0
Cd55b	4.4833	10.6431	11.7212	0.290921	0.350846	0.932321
Gm15674	1.62018	2.07377	0.989504	0.260331	0.470931	0.682599
Cd55	167.902	126.858	100.208	85.7953	86.4242	97.7228
Gm16083	1.26231	0.13963	0.359773	0.157756	0.142688	0
Zp3r	0	0	0	0	0	0
C4bp	0	0	0	0	0	0.0258863
C4bp-ps1	0	0.110129	0	0	0.112541	0.108749
Pfkfb2	109.364	96.1319	94.636	70.7136	77.9387	85.6755
Yod1	21.6626	21.1126	47.862	19.1441	22.5936	24.5167
AA986860	4.27253	1.70137	3.8967	12.1741	9.85225	14.4672
Gm28857	1.81508	4.51741	1.31319	2.74821	3.26695	2.40198
Gm28856	0	0	0	0	0	0
Fcamr	0	0	0	0.630749	0.380336	0
LOC102640771	0	0	0	0	0.0114394	0.011054
Pigr	0	0	0	0.501298	0	0
Fcmr	0.464904	0	0	18.8246	17.9725	18.0526
Il24	0	0	0	0	0	0.137642
Il20	0	0	0	0	0	0
Il19	0	0	0	0	0	0
Gm41952	0	0	0	0	0	0
Il10	0	0	0	0.247075	0	0.863791
Mapkapk2	25.1524	10.4847	2.17179	47.5919	51.8068	54.5073
Dyrk3	1.34422	2.00919	1.19121	1.59239	2.14896	1.95441
Eif2d	166.32	164.864	132.824	186.265	175.515	163.503
Rassf5	3.76561	19.8149	5.97947	68.069	71.9656	83.5551
Gm29953	0	0	0	0	0	0.00778119
Ikbke	6.56453	12.7395	4.4761	4.9535	6.93191	7.1885
Srgap2	22.4456	17.4724	24.8715	13.0555	11.9508	17.0473
Fam72a	4.32585	2.41164	4.09327	2.27058	1.87768	1.30412
Avpr1b	0	0	0	0	0	0
Ctse	999.474	1015.22	618.157	2062.21	1889.96	2125.57
LOC108167725	494.834	472.488	240.369	294.883	307.866	366.27
Rab7b	0.148667	0.814011	0.127115	1.1705	1.36119	2.26529
Gm30104	0	0	0	0	0	0
Slc26a9	0	0.229435	0	0	0	0
Pm20d1	0	0	0	0.20307	0.146939	0.106492
Slc41a1	15.1333	10.9727	12.4159	3.05007	2.75875	4.1277
Rab29	19.1361	13.946	22.3117	9.26848	9.87357	10.531
Nucks1	147.549	156.726	176.28	101.414	108.504	100.058
Slc45a3	103.099	103.902	218.891	19.8622	20.009	24.6365
Elk4	76.7478	103.723	144.92	24.2628	30.007	34.3336
Mfsd4a	45.1109	66.7169	84.7615	14.6162	15.1087	24.272
LOC105246707	0	0	0	0	0.0517093	0
LOC108167726	0	0.173326	0	0	0.265683	0
Cdk18	0	0	0.160572	1.05613	1.14631	0.923073
Gm30153	0	0	0	0	0	0
Gm30242	0	0	0	0	0	0
Gm29695	0	0	0	0	0	0
Lemd1	0	0	0	0	0	0
Mir135b	0	0	0	0	0	0
Gm29630	0	0	0	0	0	0
Gm38446	0	0	0	0	0	0
Klhdc8a	0	0	0	0	0	0
Nuak2	0.209636	1.98264	1.43396	11.6716	14.3957	14.0137
Gm30744	0	0	0	0	0	0
F730311O21Rik	0	0.163557	0.140475	0.831551	0.835697	0.646034
Tmcc2	30.5138	17.0872	9.84424	294.983	616.613	588.826
Dstyk	12.5803	16.3918	8.85836	63.8824	63.6153	72.2025
Rbbp5	90.3836	84.3407	100.053	65.4689	66.4492	69.0678
Tmem81	0	0	0	0	0	0
Cntn2	0	0	0	0	0	0
Nfasc	0	0	0	0.0119005	0.0107639	0.0312038
LOC108167727	0	0	0	0	0	0
Gm10538	0	0	0	0	0	0
Gm31101	0	0	0	0	0	0
Lrrn2	0	0.214751	0.184444	0	0	0
Gm31159	0.127191	0	0	0	0	0
Gm38687	0.100146	0	0.342514	0.112641	0	0
Mdm4	338.021	376.434	284.972	219.094	225.283	278.666
Gm41953	0	0	0	0.127164	0.115018	0
Pik3c2b	4.83063	1.57673	4.06263	4.27538	5.80055	5.37158
Gm28609	0	0	0	0.350619	0	0
Ppp1r15b	337.238	319.731	538.634	369.355	349.203	367.516
Plekha6	3.91469	2.71991	5.54377	1.97221	2.53057	2.64575
Gm19461	0.0755836	0	0.193879	0	0	0
Golt1a	0	0	0	0	0	0
Kiss1	0	0	0	0	0	0
Ren1	0	0	0	0	0	0.271525
Etnk2	0	0	0	0	0	0
Sox13	0	0	0.130626	0.687332	0.699393	0.901108
Snrpe	84.9599	73.7428	95.8593	166.209	148.424	127.31
Zc3h11a	219.643	160.016	212.506	164.697	152.961	176.074
Zbed6	59.9629	48.0561	46.9708	16.8256	17.7763	21.0083
Lax1	1.42258	0.0429158	0.184296	1.40612	0.964826	0.932321
Atp2b4	154.633	82.5431	107.83	103.551	126.408	142.241
Mir6903	0	0	0	0	0	0
Gm41954	0	0	0	0	0	0
Gm28441	0	0	0	0	0	0
Gm31515	0.17481	0	0	0	0	0
Optc	1.04971	1.56752	1.57069	1.47584	0	0.773944
Prelp	0.273058	0.271837	0	0.409499	0.55558	0.447385
Gm31629	0	0	0	0	0	0
Fmod	0	0	0	0	0.300211	0.290097
LOC105246710	0	0.1914	0	0.432492	0.195592	0.378005
Btg2	10.8723	4.36635	2.37685	148.273	150.89	182.911
Gm31974	0	0	0	0	0	0
Gm32039	0	0	0	0.209162	0.378369	0.182811
Chit1	0	0.0041181	0	0.0279161	0.00841659	0.00406652
LOC108167728	0	0	0	0	0	0
Chil1	0	3.55186	0.293326	25.0808	26.3847	27.8566
Mybph	0.0907894	0	0	0	0	0
Adora1	0	0	0	0	0	0
Gm32221	0	0	0	0	0	0
Myog	0	0	0	0	0	0
Ppfia4	0.254082	1.64415	0.651744	10.7168	10.2102	10.8653
Gm32267	0	0	0	0	0	0
Tmem183a	77.2118	103.909	112.81	97.2527	98.4911	96.8358
4933406M09Rik	0	0	0.172592	0	0	0
Cyb5r1	17.8347	25.0684	40.4106	12.3702	11.7071	15.8628
Adipor1	231.647	282.932	233.921	461.776	502.993	509.81
Klhl12	47.689	52.9537	48.0636	43.6876	40.4296	44.5122
Rabif	32.0829	38.4534	55.8865	26.2728	25.3381	25.107
Gm29376	5.39289	12.655	8.23409	13.4312	6.662	8.70964
LOC108167729	0.00299672	0	0.00512457	0	0	0.00294594
Mgat4e	0.0522314	0	0	0	0	0
LOC108167730	0	0	0	0	0	0.394165
Kdm5b	457.206	372.064	458.905	72.6992	64.5453	63.1504
Syt2	0.241293	0.240213	0.206313	0.542792	0.245474	0.711613
Ppp1r12b	44.5939	37.173	49.8221	42.9347	47.9073	53.0736
Gm32670	0	0	0	0	0.12315	0
Ube2t	37.2802	31.5623	29.6962	56.9836	51.703	44.3229
Lgr6	0	0	0	0.0135079	0	0
Ptprv	6.11256	4.35834	4.78501	1.8117	2.35294	2.15187
Ptpn7	471.386	307.739	533.978	134.342	147.132	115.537
Arl8a	16.6898	17.3421	31.2163	39.0692	36.9294	38.2489
Gpr37l1	0	0	0	0	0	0
Gm41955	0	0	0	0	0	0
Elf3	0	0.085151	0.146268	0	0	0
Rnpep	21.5716	7.19166	33.8862	41.4161	51.4441	54.4454
Timm17a	107.858	103.223	146.485	142.092	134.279	117.161
Gm41956	0	0	0	0	0	0
Lmod1	0	0	0	0	0.139602	0
Shisa4	0.368745	0	0.472932	0	0.375135	0
Ipo9	64.126	56.3041	66.6046	61.8394	54.7031	57.769
Nav1	0.602883	0.65827	0.232799	2.5374	3.42279	4.1678
Mir1231	0	0	0	0	0	0
Gm32940	0	0.0286602	0	0.0647613	0.0146439	0.0283012
Gm4793	0	0	0	0	0	0.0667697
Gm32835	0	0	0	0	0	0
Csrp1	39.2539	27.6154	42.3071	76.6194	69.0555	68.6288
Phlda3	0.0694512	0.0691406	0.118766	1.87478	1.76637	1.36549
Tnni1	0	0	0	0	0	0
Lad1	0	0	0	0	0	0.823537
Tnnt2	0	0	0	0	0	0.337676
Pkp1	0.0129186	0	0	0.0145304	0.00657127	0
Igfn1	0	0	0	0.217409	0	0
Tmem9	4.98238	5.00684	7.09514	6.87792	7.42101	6.79024
Ascl5	0.273751	0	0.156044	0	0	0
Cacna1s	0	0	0	0	0.133391	0
Gm15850	0	0	0	0	0	0
Kif21b	14.6429	9.95534	4.6569	12.1515	14.6242	18.1252
Mroh3	0	0.337305	0	0	0	0
5730559C18Rik	0	0	0	0	0.130627	0
Gpr25	0	0	0	0.171106	0.154763	0
Camsap2	88.408	76.6129	50.7544	131.542	133.625	150.727
9230116N13Rik	9.71692	12.3337	8.30827	12.2953	11.3681	4.53734
Ddx59	3.80282	4.67138	2.85222	3.72697	2.80539	3.36674
Kif14	48.536	30.9298	31.2575	46.3248	44.2307	53.7189
Gm29485	0.276204	0.412454	0.826572	0.155332	0.421487	0.135762
Zfp281	41.1762	38.5174	62.4669	25.7701	23.9684	24.2234
Gm34056	0	0	0	0	0	0
Gm41958	0.0224844	0.0223839	0	0.177027	0.0228741	0.0663104
Gm19705	0	0	0	0.394426	0.305788	0.295486
Platr22	0	0	0	0	0	0
Nr5a2	0	0	0	0	0	0
Gm34244	0	0	0	0	0	0
Gm34306	0	0	0	0	0	0
Gm4258	0	0	0	0	0	0
Mir181a-1	0	0	0	0	0	0
Mir181b-1	0	0	0	0	0	0
Gm34353	0	0	0	0	0	0
Ptprc	0.392924	12.3218	2.07177	83.6014	90.4065	92.5754
Atp6v1g3	0	0	0	0	0	0
Gm28500	0	0	0	0	0	0
Nek7	33.3623	36.4939	27.6213	22.4232	21.1921	21.598
Gm5833	0	0	0	0	0	0
Lhx9	0	0	0.101678	0	0	0
2310009B15Rik	14.1418	16.1799	19.1302	17.568	19.7552	14.9397
1700019P21Rik	0	0	0	0	0	0
Dennd1b	65.9247	73.7297	72.065	32.147	32.8969	30.7632
4930596I21Rik	0.0509805	0.0169175	0.01453	0	0.017288	0.100234
Gm41960	0.0738246	0	0.189367	0	0.0751041	0.217721
Crb1	0	0	0	0	0	0
4933436E23Rik	0	0	0	0	0	0
Gm34816	0	0	0	0	0	0
Zbtb41	26.9644	31.1314	31.1409	12.8475	15.0494	14.5424
Gm41962	0.263711	0.0875105	0.375802	0.197741	0	0.0864143
Aspm	75.1682	56.0122	62.5818	60.3035	62.2182	73.1883
F13b	0	0	0	0.182153	0	0
Cfhr1	0	0	0	0	0	0
Cfhr3	0	0	0	0	0	0
Gm4788	0	0.0903834	0	0	0	0
Gm41963	0	0	0	0	0	0
Cfhr2	0	0	0	0	0	0
Cfh	0.0746162	1.15138	0.127598	2.05617	1.36637	1.65042
Kcnt2	0.0513364	0	0	0	0	0
4930590L20Rik	0	0	0	0	0	0
Gm35244	0	0	0	0	0	0
Gm35303	0	0	0	0	0	0
Cdc73	127.668	108.69	119.826	72.9535	80.0186	71.1197
B3galt2	0	0	0	0	0	0
Gm38658	0	0	0	0	0	0
LOC108167731	0	0	0	0	0	0
Glrx2	39.5588	52.0015	49.6148	34.4153	32.4623	29.9721
Trove2	17.363	23.5814	21.3349	2.58665	4.79617	4.18243
Uchl5	109.708	145.316	162.298	144.828	145.487	123.672
Gm41964	0	0	0	0	0.0398283	0
Rgs2	0.114216	2.53941	0.423185	19.8693	26.8411	26.7976
Gm35356	0	0	0	0	0	0
Rgs13	0	0	0	0.118125	0.106842	0.103243
Gm35415	0	0	0	0	0	0
Rgs1	0.278462	0.277217	5.23807	9.18729	5.94906	7.02611
Rgs21	0	0	0	0	0	0
Rgs18	42.8032	22.3058	34.8805	21.3777	18.2354	18.6844
Gm41965	0	0	0	0	0	0
Gm29514	0	0	0	0	0	0
Brinp3	0	0	0	0	0	0
Gm41966	0	0	0	0	0	0
Gm29398	0	0	0	0	0	0
Pla2g4a	40.6889	16.5564	22.3652	30.8733	28.2531	25.079
Ptgs2os	0	0	0	0	0	0
Ptgs2	0	0	0	0.724183	0.927937	1.20729
Ptgs2os2	0	0	0	0.0572146	0.0517499	0.0166688
Gm15453	17.0836	26.6115	31.3218	26.2156	24.4282	23.9595
Pdc	0	0	0	0	0	0
2310030A07Rik	0	0	0	0	0	0
BC003331	8.09369	11.6028	9.85885	6.5825	7.80326	6.61007
Tpr	83.9426	76.4826	93.9478	47.9292	47.1452	49.862
Prg4	0.11105	0.0829154	0.0593448	0.733817	1.01678	0.313861
Gm41967	0	0	0	0	0	0
Hmcn1	0	0	0	0	0	0
Gm36297	0	0	0	0	0	0
Gm36139	0.0985002	0	0	0	0	0.193663
Gm36077	0	0	0	0	0	0
C730036E19Rik	0	0	0	0.470209	0.992363	1.09592
3110040M04Rik	0.194982	0.0647035	0.750223	0.0731028	0.231422	0.159732
LOC108167732	0	0.00723408	0	0.057212	0.0591401	0.0535759
LOC108167733	0.0237694	0.00788771	0.00677454	0.142586	0.145088	0.077889
Ivns1abp	292.715	310.937	387.264	182.304	188.662	183.663
Swt1	1.18551	0.713837	0.956429	1.13986	1.18661	1.27351
Trmt1l	21.1749	15.7968	13.5216	20.8019	22.3599	22.5025
Mir7682	0	0.0495731	0.127731	0.0560083	0	0
Rnf2	97.5965	72.189	91.247	77.7128	82.3533	82.2688
Gm36527	0.0788722	0.0785195	0.202315	0	0	0
Fam129a	0.790167	2.75322	12.7885	24.1231	29.628	32.3473
Gm41969	0	0	0	0	0	0
LOC102640772	0.625931	0.196778	0.0563359	0.111161	0.167573	0.453398
Edem3	117.179	80.1399	106.298	54.8704	59.3585	61.9998
Gm25279	0	0	0	0	0	0
1700025G04Rik	0	0.265927	0.0761325	0.801193	0.543502	0.729433
Gm36920	0.134263	0	0	0	0	0
Gm41970	0	0	0	0.0877498	0	0.0383473
Tsen15	7.2234	8.83979	9.00827	4.99365	4.5167	3.42927
Colgalt2	0	0	0	0	0	0.0106692
Rgl1	12.5711	19.4559	17.3123	13.783	13.9711	16.8582
LOC108167734	0	0.0347381	0.208849	0	0	0
Apobec4	0	0	0.0441464	0	0	0
Arpc5	90.2476	110.014	101.137	94.7999	93.7274	92.5237
Ncf2	0.103444	2.29992	0.88448	13.4578	16.417	17.7621
Smg7	17.1615	14.8471	21.8711	9.06348	8.55224	9.96555
Gm29954	0	0	0	0	0.0322537	0
Nmnat2	1.93782	1.92004	1.94773	0.00308941	0.00232861	0.00180013
Lamc2	0	0	0.00278633	0.0036653	0.00331522	0.00640706
Lamc1	114.543	90.9585	45.9839	3.17489	2.41823	2.7749
LOC108167838	0	0	0	0	0	0
E330020D12Rik	0	0	0	0.0340053	0.0276817	0.023777
Shcbp1l	2.81368	1.40055	3.20772	0.879087	0.636099	0.461002
Dhx9	584.273	468.349	560.379	331.69	338.816	344.728
Npl	0	0.219582	0.282889	11.7841	9.5366	11.8173
LOC108167735	0	0	0	0	0	0
Rgs8	0	0	0	0.0671914	0.0303869	0
C230024C17Rik	0.12426	0.247409	0	0	0	0.24431
Rgs16	0.353922	0.264255	0.0756537	0.696635	0.810126	0.695851
Rnasel	46.969	59.1578	25.0565	52.9204	54.9877	55.2158
Rgsl1	0	0	0	0	0	0
Gm41974	0	0	0	0	0	0
Teddm2	0	0	0	0	0	0
Teddm1b	0	0	0	0	0	0
Teddm1a	0	0	0.0156893	0	0	0
Gm38440	0.316298	0.524807	1.08178	0.35576	0.10726	0
Mir8114	0	0	0	0	0	0
Glul	97.6568	69.4059	57.8331	253.371	278.35	284.813
Gm30327	0	0	0	0	0	0.0913268
LOC108167736	0	0.193818	0	1.31387	1.38644	1.24404
LOC108167737	0	0	0	0	0	0
Gm30388	0	0	0	0	0	0
Zfp648	0	0	0	0	0	0
4930452N14Rik	0	0	0	0	0	0
4930532M18Rik	0	0	0	0	0	0
Gm30465	0	0	0	0	0	0
Cacna1e	10.6734	4.89341	2.28153	13.7426	17.1448	19.4665
Gm30521	0	0	0	0	0	0
Gm41976	0	0	0	0	0	0
Gm30602	0	0	0	0	0	0
Gm41977	0	0	0	0	0	0.015059
Gm41980	0	0	0	0.0742891	0	0
Gm41979	0	0	0	0	0	0
Gm9530	0	0.166087	0	0.281471	0.763761	0.0820034
Ier5	9.21666	10.692	13.4816	57.6584	55.0185	68.5154
Gm41981	0	0	0	0	0	0
Gm30922	0	0	0	0	0	0
Mr1	1.3552	4.76166	0.408966	3.85551	3.64946	4.38854
Stx6	10.8457	11.6111	10.7413	4.3217	4.68516	4.71484
LOC108167738	0	0.114656	0.0492375	0	0	0
BC034090	0	0	0	0	0.260841	0.0840177
Gm31102	0	0	0	0	0	0
Xpr1	37.4755	42.7784	35.3207	21.2371	21.4839	21.2626
Gm31713	0	0	0	0	0	0
Gm31772	0	0	0	0	0.00737413	0
Gm5532	0	0	0	0	0	0
Acbd6	44.793	32.3077	44.4787	37.5751	42.3094	35.9913
Lhx4	0	0	0	0	0	0
Qsox1	5.58362	5.98793	4.46219	4.3402	4.65679	5.15206
Cep350	31.0467	28.5249	21.4799	15.6474	17.0944	19.4773
Tor1aip1	35.1297	31.948	31.9854	42.0755	45.5264	48.0372
Tor1aip2	148.318	128.935	125.371	171.693	161.42	166.367
Fam163a	0.0769863	0	0.0658257	0	0	0
Gm30472	0	0	0	0	0	0
Tdrd5	0.123055	0	0.841728	0	0	0
Nphs2	0	0	0.164242	0	0	0
Axdnd1	0.0987708	0	1.18233	0.222187	0	0
Soat1	0.286602	1.4266	0.762389	4.62046	6.38212	6.63668
Gm39682	0	0	0	0	0	0.115
Abl2	24.0016	23.0515	38.6599	9.29738	8.8653	12.287
Tor3a	3.14913	1.56752	0.932056	11.1029	12.0139	10.7162
Fam20b	69.7678	59.9283	65.5454	52.6914	49.8007	50.8983
Gm39683	0.0957034	0.0952754	0.245488	0	0	0.188164
Ralgps2	6.79419	9.58206	9.92413	11.3035	12.9599	17.2543
Angptl1	0	0	0	0.0944078	0	0.247542
4930439D14Rik	0	0	0	0.0798119	0	0
Gm39685	0	0	0	0	0	0
Gm30568	0	0	0	0	0	0
Tex35	0	0	0	0	0	0
Gm30694	0	0	0	0	0	0
Rasal2	0.561175	1.45253	7.48523	2.27227	2.96868	3.42033
2810025M15Rik	0.3534	1.26655	10.6363	4.2929	5.39288	3.40464
BC026585	0.261685	0.217095	1.04416	3.92443	3.50523	3.17276
Gm15486	0	0	0	0	0	0
Sec16b	0.0795411	0.316742	0.476071	0.447323	0.566437	0.703741
Gm30903	0	0	0	0	0	0
Gm39686	0	0	0	0	0	0
Brinp2	0	0	0	0.430573	0.584172	1.12898
Astn1	0	0	0	0	0.123381	0
Mir488	0	0	0	0	0	0
Pappa2	0	0	0	0	0	0
Gm39687	0	0	0	0	0	0
4930562F17Rik	0	0	0	0	0	0
Rfwd2	24.9654	28.5686	26.7398	40.5713	32.0866	33.6258
Scarna3a	0.144485	0	0	0	0	0
Mir1843b	0	0	0	0	0	0
Tnr	0	0	0	0	0	0.142994
Gm31348	0	0	0	0	0	0
Gm31493	8.5706	6.56329	3.83318	0.593223	0.402422	0.518486
Gm31667	0.0756897	0	0	0	0	0
Gm37294	0	0	0	0	0	0.10205
4930523C07Rik	56.001	60.4053	33.1635	33.8245	33.837	29.7721
4930562F07Rik	0.198633	0.527319	0.0566125	0	0	0
Tnn	0.0749012	0.149133	0	0	0.152399	0
Mrps14	1.80081	1.99101	1.99261	3.1931	2.93123	2.57839
Cacybp	233.426	186.715	296.773	186.298	207.935	162.827
Rabgap1l	164.704	209.691	143	57.693	60.8956	57.3637
Mir1927	0	0	0	0	0	0
Gpr52	0.183681	0	0	0	0.0747459	0.108342
Rc3h1	17.6788	14.2998	17.0236	12.1649	11.2408	12.9718
Serpinc1	0.109612	0.436485	0.562328	0.123287	0.111511	0.538772
Zbtb37	21.3911	26.4269	15.4254	7.10202	5.63711	6.08059
Gas5	187.963	202.303	147.677	221.018	180.569	173.686
Snord47	0.375419	0.112122	0.224696	0.126677	0.15277	0.0369058
Dars2	99.1858	73.0225	57.4648	105.058	105.867	97.8605
Cenpl	27.7093	22.5429	22.0789	76.296	63.6538	68.4413
Klhl20	22.0857	17.799	24.3294	15.115	14.2657	16.14
Ankrd45	0	0.093127	0.0799842	0	0	0
4930469G21Rik	0.101657	0.101202	0	0	0	0
Prdx6	177.673	383.046	209.651	116.635	107.09	94.4138
Tnfsf4	0	0	0.727793	0	0	0
Tnfsf18	0	0	0	0.057604	0.0130255	0
Gm31815	0	0	0	0	0	0
Gm31869	0	0	0	0	0	0
Fasl	0.0756366	0	0	0.255219	0.230842	0.0743551
Suco	43.2173	39.4233	43.9303	52.26	63.8738	74.668
Gm31925	0	0	0	0	0	0
4930558K02Rik	0	0	0	0	0	0
Pigc	17.6515	22.9357	22.9329	20.3694	17.9575	18.5919
Dnm3	0	0	0.0806135	0	0.0959152	0
2810442N19Rik	0	0	0	0	0	0
Dnm3os	0	0	0	0	0	0
Mir199a-2	0	0	0	0	0	0
Mir214	0	0	0	0	0	0
Gm39688	0	0	0	0	0	0
Gm31985	0	0	0	0	0	0
Mettl13	10.1749	7.81107	11.702	4.09014	3.84528	3.839
Vamp4	1.9169	2.46811	1.20194	3.01848	3.51022	3.54272
Myoc	0	0	0	0	0	0
7420461P10Rik	0	0	0	0	0	0
Prrc2c	346.641	279.019	323.113	82.1748	96.3515	101.619
Fmo4	0	0	0	0	0	0
Fmo1	0.45638	0.302893	0.130073	0.171106	0	0.598197
Gm32197	0	0	0	0	0	0
Fmo2	0	0.114901	0.0986857	0.194726	0.234836	0.113462
Fmo6	0	0	0	0	0	0
Gm32279	0	0	0	0	0	0
Fmo3	0	0	0	0	0	0
Mroh9	0	0	0	0	0	0
Prrx1	0	0	0	0.147584	0.0667439	0
LOC108167739	0	0	0	0	0	0
LOC108167740	0	0	0	0	0	0
Gm20471	0	0	0	0	0	0
Gorab	3.13718	3.70026	4.11106	2.53137	2.53243	2.48063
Gm32333	0	0	0	0	0	0
Gm39689	0	0	0	0	0	0
Mettl11b	0	0	0	0	0	0
Kifap3	1.43333	1.07019	31.864	6.44859	13.3058	8.63038
Scyl3	2.44582	3.11673	2.45074	0.711892	0.800273	0.722202
BC055324	77.8522	64.1831	63.677	40.134	32.5881	36.0078
Mettl18	4.43175	5.51492	5.77867	2.86618	2.14157	1.03471
Sele	0	0.0841171	0	0.190073	0.0429796	0.415317
Sell	0.473753	7.34964	1.41776	18.0728	22.6121	25.0716
Selp	0	2.40137	1.03123	1.55034	0.876414	1.35502
Gm16548	0	0	0	0	0.0805632	0.0259497
F5	0.184183	1.21017	0.0314965	2.85884	3.67256	3.76611
Slc19a2	9.30538	13.1938	25.9185	7.61186	7.41076	6.56048
Ccdc181	12.3955	13.1113	15.309	11.6183	10.7713	9.5622
Blzf1	24.7767	17.4236	29.2081	20.0411	18.0197	17.6199
Nme7	2.88713	1.75127	2.7097	2.79421	2.81421	2.6138
Gm39690	0	0	0.510076	0	0	0
Atp1b1	0	0.40519	0	16.633	23.4636	27.3412
Gm32391	0	0	0	0.193022	0.261878	0.0843519
LOC108167741	0	0	0	0	0	0
Gm32459	0	0	0	0	0	0
Gm39691	0	0	0	0	0	0
Gm26685	0	0	0	0	0	0
Dpt	0	0	0	0	0	0
Gm32569	0	0	0	0	0	0
Gm32652	0	0	0	0.657043	0.0540261	0.52206
Gm20743	0	0	0	0.547076	0.123706	0.836767
Xcl1	0	0	0	1.26369	2.00023	2.48509
Gm39692	0	0	0	0	0	0
1700029M03Rik	0	0	0	0	0	0
4930568G15Rik	0	0	0	0	0	0
Tbx19	0	0	0	0	0.135132	0
Sft2d2	32.0347	33.6351	36.9675	21.204	23.5866	28.0935
Tiprl	45.0927	33.9344	44.7935	33.6001	33.7818	32.5201
Gpr161	0.17481	0.696113	0	0	0.17784	0
Dcaf6	4.41476	6.13862	3.84902	7.19598	7.43638	7.59138
Mpc2	15.3494	17.0958	15.3871	32.4122	35.419	33.0116
Adcy10	0.0621659	0	0.0531538	0	0	0.183338
Mpzl1	0.653401	0.83633	3.75113	11.7587	10.3507	12.709
Rcsd1	2.41719	1.98708	7.98525	7.00285	7.91749	9.66694
LOC108167742	1.88398	1.60762	2.01358	1.05951	1.23212	1.12446
Creg1	260.775	381.465	315.374	284.529	314.166	331.973
Cd247	0.597644	0.735294	0.322993	0.0824403	0.0688303	0.0498836
Gm32999	0.524117	1.59278	0.117931	0.0310266	0.0280632	0.0813532
Pou2f1	8.16407	7.21178	8.23682	2.19866	2.35259	2.97669
Gm33224	0	0	0	0	0	0
Gm39693	0	0	0	0	0	0
Dusp27	0	0	0	0	0.0111591	0
Gpa33	0	0	0	0	0	0
Mael	0	0	0	0	0	0
Ildr2	0	0	0	0	0	0
Tada1	15.9659	14.8047	16.583	8.94407	9.18244	8.28426
Pogk	54.0015	29.0477	36.988	3.26552	3.69203	3.99576
Gm39694	0	0	0	0	0	0
Gm33354	0	0	0	0	0	0
Gm4846	0	0	0	0	0	0
Gm4847	0	0	0	0	0	0
Fmo9	0	0	0	0	0	0
Gm33404	0	0	0	0	0	0
LOC108167743	0	0	0	0	0	0
Gm16701	0	0	0	0	0	0
Fam78b	0	0.100398	0.129343	0.0567153	0	0.14871
Gm33610	0	0	0	0	0	0
Gm33668	0	0	0	0	0	0
Uck2	64.2557	60.7401	105.274	38.2684	38.978	32.5153
LOC108167744	0	0.00921519	0.0158294	0	0	0.00909976
LOC102636733	0.225644	0.299513	0	0.169197	0.0765182	0.295761
Mir6347	0	0	0	0	0	0
Tmco1	53.8597	54.7904	57.7718	62.4479	54.4409	56.3499
Aldh9a1	378.271	404.353	462.987	246.334	277.335	226.313
Mgst3	54.4755	25.6649	15.4222	314.863	285.809	314.419
Gm34207	0	0	0	0	0	0
Lrrc52	0	0	0.115422	0	0	0
Rxrg	0.932824	0	0	0	0.0593119	0
Lmx1a	0	0	0	0	0	0
Pbx1	0.289163	3.16657	0.824145	11.1665	11.1786	12.7919
Gm39696	0	0	0	0	0	0
Mir6348	0	0	0	0	0	0
Gm34320	0	0	0	0	0	0
Mir6354	0	0	0	0	0	0
Gm39697	0	0	0	0	0	0
Gm34421	0	0	0	0	0	0
Gm34477	0	0	0	0	0	0
Gm34535	0	0	0	0	0	0
Nuf2	183.025	141.478	154.317	294.148	281.985	278.065
Gm34624	0	0	0	0	0	0
Rgs5	0.00451571	0	0	0.121898	0.0275638	0.0399528
Rgs4	0	0	0	0.0216105	0.00651547	0.00629597
Gm39698	0	0	0	0	0	0
Gm39699	0	0	0	0	0	0
Ccdc190	0	0	0	0	0	0.0415479
Hsd17b7	1.14475	0.359003	0.663286	0.20752	0.221826	0.243208
3110045C21Rik	0.102689	0.136306	0.11707	0.308001	0.174115	0.201898
Ddr2	0	0.0967346	0	0.327876	0.197706	0.382091
Uap1	63.0519	84.3036	135.754	88.6271	74.0994	70.6628
Uhmk1	46.1686	49.939	54.9859	11.4906	15.7229	19.6353
Sh2d1b2	0	0	0	0.0936065	0	0
Gm6345	0	0	0	0	0.0255655	0.0247042
Sh2d1b1	0	0.109735	0	1.36378	1.37369	2.00466
Gm7694	3.36226	0.440424	0.226961	10.151	6.57102	9.04607
1700015E13Rik	0.344594	0	0	0	0	0
Nos1ap	3.36613	5.60864	3.96881	5.06139	4.36169	4.66757
LOC108167745	0	0	0	0.108316	0	0
Olfml2b	0	0.117384	0	0.601221	0.887669	0.942767
Atf6	4.61964	3.78458	3.36362	2.74684	2.74761	3.04532
Gm29733	0.0849608	0	0.0363221	0	0	0.0417607
Dusp12	4.07447	3.24961	5.9383	1.69251	1.57796	1.29722
Fcrlb	0	0	0	0.322644	0.21887	0.352495
Fcrla	0.141546	0.0704563	0.060513	7.32342	10.4399	11.4101
Gm39701	9.26423	7.87908	7.08188	2.07021	5.24293	4.04098
Fcgr2b	0.439638	6.27329	1.12771	14.8346	17.443	14.6944
Gm34968	0	0	0	0	0	0
LOC102638466	0	0	0	0	0.104602	0
Fcgr4	0.398735	9.32836	1.10803	13.7908	16.7329	10.5834
Gm35090	0	0	0	0	0	0
Fcgr3	0.0378448	2.59962	0.808963	24.6885	26.219	27.3447
Mir6546	0	0	0	0	0	0
Cfap126	3.33796	2.69996	3.74595	3.87172	1.80402	3.69158
Sdhc	123.624	124.261	136.75	164.842	150.191	150.298
LOC108167746	0.482046	0.239945	0.240429	0.0451821	0.204333	0.197449
Mpz	0.0281172	0	0	0.0632503	0.0572091	0.0276409
Pcp4l1	0	0	0	0.0535544	0.0726589	0.0585092
Nr1i3	0	0	0.204483	0	0.121649	0
Tomm40l	1.19974	1.31761	1.32298	1.38691	1.39974	1.28238
Apoa2	0.0265987	0.00882659	0.0151618	0.0498619	0.0631393	0.0435801
Fcer1g	0.32796	5.18308	1.01651	49.6599	45.4589	56.1788
Ndufs2	167.449	154.41	160.555	164.849	169.029	151.381
Adamts4	0.0822624	0.0233984	0	0.0132179	0.0119554	0
B4galt3	23.3664	28.9088	30.258	45.5166	42.2888	46.5235
Ppox	119.336	198.619	170.877	581.32	503.989	607.144
Usp21	16.6731	12.3249	10.1267	19.443	20.0035	19.8195
Ufc1	10.571	12.828	14.4862	14.869	12.8419	12.6204
LOC105244007	3.7107	0.985096	1.05759	0.556486	1.76167	3.40464
Dedd	14.8144	12.1522	11.9559	13.007	13.0719	15.0092
Nit1	13.2193	19.3415	11.9024	20.5006	22.7197	22.2496
Pfdn2	25.8132	16.9812	27.4503	23.1978	24.941	18.4262
Klhdc9	0.426572	0.590837	0.666033	0.531942	0.632079	0.355531
Nectin4	0.330345	0	0	5.57339	8.06569	9.74245
Arhgap30	0.535274	9.14778	3.35629	60.4062	64.1663	68.319
Usf1	14.3849	12.6527	11.7562	22.3525	23.3912	23.6254
Tstd1	1.42105	0.848818	0.486017	1.43851	0.433704	0.55879
Gm26641	0	0	0	0	0	0
F11r	0	0	0	0.990897	1.02429	1.23723
Alyref2	0.0255715	0.0254571	0.0253167	0.0302755	0.0191687	0.019846
Itln1	0	0	0	0	0	0
Gm35200	0	0.0198055	0.0170104	0.0111882	0.0101196	0.00977869
Gm39703	0	0	0	0	0	0
Cd244	0	0.480965	0.103272	0.8151	1.02396	0.751988
Ly9	0.0999146	0.547073	0.17086	18.8798	20.4817	21.707
Slamf7	0.0489328	0.0584568	0.0418391	0.418286	0.487853	0.538762
Mir7683	0	0	0	0	0	0
Cd48	131.668	27.9495	34.4882	38.7725	40.6731	44.8926
Slamf1	34.3487	8.63877	1.28416	0.156413	0.113179	0.109366
Cd84	8.8479	11.5609	9.12762	9.6002	9.90625	10.9434
Gm37065	0	0	0	0.169386	0.122566	0.118437
Slamf6	0.0217018	0.0432094	0.0371114	1.61101	2.03116	2.47475
Vangl2	0.52409	0.365223	0.492925	0.707371	0.639808	0.721295
Nhlh1	0	0	0	0.00705355	0	0
Ncstn	109.613	131.996	132.33	137.824	121.901	122.97
Copa	142.294	126.149	119.352	64.5533	66.4785	68.8331
Pex19	28.3284	36.14	33.1927	41.3034	38.8528	34.7246
Dcaf8	80.3557	151.486	88.3026	126.406	126.768	120.494
Pea15a	1.70614	1.55081	3.36159	22.4439	27.3186	25.8148
Gm17224	0.411985	0.328114	0.422713	0.0926769	0	0.243003
Casq1	0	0.054644	0.0469322	0	0.0279204	0.107919
Atp1a4	0	0	0	0	0	0
Atp1a2	0.0937894	0	0	0	0	0
Gm39704	0	0	0	0	0	0
Igsf8	1.96105	0.893974	1.45093	2.55476	2.88172	3.08322
Kcnj9	0.0827765	0	0	3.35173	3.0316	3.49908
Kcnj10	0.439041	0.145693	0.250263	79.3397	110.323	123.582
Pigm	18.7619	22.568	34.0197	10.3944	10.632	12.1639
Slamf9	0.0479368	0	0.0819749	1.2401	1.26796	0.989617
Gm35522	0	0	0	0	0	0.0247099
Igsf9	0	0	0	1.49638	0.193352	1.21444
Tagln2	45.7494	74.3899	11.0239	100.575	122.844	97.4444
Gm37125	0.0902387	0.0898351	0.0578677	0.0253742	0.114753	0.17742
Cfap45	0	0	0	0.0272555	0.0493044	0.119108
4933439K11Rik	0	0	0	0.0572776	0.155421	0.100123
Vsig8	0	0	0	0	0	0
Slamf8	0	0	0	0.578512	0.470931	0.252814
Fcrl6	0	0	0	0.242144	0.876064	0
Dusp23	0.157319	0.595138	0.188318	0.990897	1.18433	0.989782
Gm35601	0	0	0	0	0	0
Crp	0	0	0	0	0	0
Apcs	0	0	0	0	0	0
Gm35686	0	0	0	0	0	0
Olfr16	0	0	0	0	0	0
Gm35742	0	0	0	0	0	0
Olfr1408	0	0	0	0	0	0
Olfr1406	0	0	0	0	0	0
Olfr218	0	0	0	0	0	0
Olfr1404	0	0	0	0	0	0
Fcer1a	0.0163378	0	0.275894	0.0597221	0.0457075	0.0521981
Olfr418	0	0	0	0	0	0
Mptx2	0	0	0	0	0	0
Ackr1	10.7273	7.37842	13.925	21.4438	22.5704	21.9059
Cadm3	1.33244	2.93223	7.6152	2.52409	3.28182	6.20464
Aim2	1.18339	3.7026	5.38442	8.60417	8.34132	11.5088
LOC102639543	0	0	0.0801696	0.386686	0.635914	0.706664
BC094916	0	0	0	0.194986	0.205757	0.340842
Pydc4	0	0.0592416	1.18722	0.122708	0.171527	0.224248
Pyhin1	0	1.46445	0.628887	10.6364	12.5066	12.7051
Pydc3	0	0.0992379	0	1.23332	1.41976	0.391979
AI607873	0	0.0366344	0.00629286	0.342157	0.242091	0.400342
Ifi204	0.123172	0.286116	0.842529	5.81864	6.09827	6.61933
Mndal	0.338643	0.842821	1.54427	3.99936	3.33028	4.9381
Mnda	0	0	0	3.62389	3.58993	3.09192
Ifi203	0.76292	2.08865	1.14156	15.3386	13.1944	17.6249
Ifi202b	0	0	0	0	0	0
Ifi205	0	0.162076	0	1.83116	2.23595	0.640183
Olfr433	0	0	0	0	0	0
Olfr432	0	0	0	0	0	0
Olfr430	0	0	0	0	0	0
Olfr429	0	0	0	0	0	0
Olfr427	0	0	0	0	0	0
Olfr231	0	0	0	0	0	0
Olfr424	0	0.029515	0.00844986	0.0111155	0.0100538	0
Olfr421-ps1	0	0.232213	0.0398883	0	0.237299	0.0917218
Olfr420	0.191577	0.254293	0.327609	0.71826	1.10442	1.00443
Gm36196	0	0	0	0.249361	0.112772	0.217945
Spta1	683.539	545.325	423.704	866.802	868.033	1070.31
Olfr419	0.0313176	0.0623551	0	0.211349	0.0637207	0.153935
Mptx1	0	0	0	0	0	0
Olfr417	0.0127976	0	0	0	0	0
Olfr248	0.0826655	0	0	0.0464894	0	0
Olfr414	0	0.319095	0	0	0	0
Olfr220	0	0	0	0	0	0
Fmn2	0	0.130152	0.223568	0.147047	0.931017	0.128522
Grem2	0	0	0	0	0	0
Rgs7	3.004	0.427223	71.3068	0.160894	0.43658	0
Fh1	49.1157	33.8629	51.8304	39.6078	34.4481	28.0268
Kmo	0.36275	0.240752	6.09987	3.80806	4.42845	3.80378
Opn3	2.81839	1.18707	8.06362	1.34116	1.87473	1.49188
Chml	18.8303	12.1786	40.4155	5.25886	5.86427	6.3593
Gm39707	0	0	0	0	0	0
Wdr64	0	0	0	0	0	0
Gm36360	0.110586	0.036697	0	0	0.0750014	0
Exo1	170.71	132.095	217.949	208.59	230.9	231.512
Becn2	0.0488708	0.0243261	0	0	0	0.0240214
Pld5	0	0	0	0	0	0.0112726
LOC108167747	0	0	0	0	0	0
Gm36536	0	0	0	0	0	0
Gm36586	0	0	0	0	0	0
Cep170	17.1629	15.0077	18.8246	8.35597	7.75095	7.80968
Mir350	0	0	0	0	0	0
Sdccag8	4.67806	4.2219	5.49518	3.6881	4.40331	4.72774
Hmga2-ps1	0.199187	0.18067	0.238436	0.17923	0.216149	0.139245
Gm15423	0.0806112	0	0.0689251	0	0	0.0396227
Akt3	18.6244	14.9076	11.9579	7.59652	8.43253	10.0933
Gm36904	0.0270422	0.0134606	0	0.030416	0	0.013292
Zbtb18	12.8923	12.6436	18.7331	10.4871	11.8666	15.0502
Gm29856	0	0	0	0	0	0
Gm30013	0	0	0	0	0	0.0515712
2310043L19Rik	0	0	0	0	0	0
Gm30115	0	0	0	0	0	0
1700016C15Rik	0	0.0121727	0	0	0	0
Adss	35.277	38.0827	33.9266	27.2832	27.5767	23.8771
Gm7068	0	0	0	0	0	0
Gm16432	0	0.083269	0	0.0470392	0.0850927	0
Desi2	3.36085	2.85444	4.64239	1.57194	1.74904	1.57017
LOC108167748	5.69163	7.23015	4.55824	7.79214	7.6243	8.00038
B230369F24Rik	0.0540691	0.0235495	0.0173366	0.0266065	0.0240652	0.0365427
Cox20	1.0216	1.25174	0.671926	1.72359	2.75817	2.78112
Hnrnpu	390.832	280.491	363.52	291.594	292.992	294.128
Efcab2	0.525623	0.251171	0.2337	0.922271	1.11224	0.847416
Gm31289	0	0	0	0	0.00110215	0
Gm39709	0	0	0	0	0	0
Kif26b	0.100614	0.136587	1.22003	0.0102878	0.046526	0.0359669
Gm39710	0	0	0	0	0	0
LOC108167845	0	0	0	0	0	0
Smyd3	13.8694	20.8227	26.8261	6.10861	6.48408	4.89778
LOC108167846	0	0	0.177806	0	0	0
Gm31349	0	0.00697515	0	0	0	0
Tfb2m	36.0609	51.9089	48.6109	14.068	15.6989	16.6072
Cnst	11.7107	7.1704	8.99401	5.37652	4.95524	5.56513
Sccpdh	0	0.0421576	0	0.428672	0.775456	0.790961
Gm1305	0	0	0	0	0	0
Ahctf1	28.5532	23.6246	24.1411	11.0663	11.9628	12.2669
Gm31668	0.115727	0.172815	0	0	0	0
Cdc42bpa	4.27314	5.43113	3.36295	1.39536	1.36493	1.43036
LOC108167749	0.425919	0.24942	0.042844	0	0	0
Gm38331	0.196224	0	0	0	0	0
Adck3	2.51012	5.65134	2.90566	2.12832	1.65003	1.36666
LOC108167750	0.00429969	0	0	0	0	0
Gm37336	0.066937	0	0.076311	0.025096	0	0
Psen2	158.47	112.83	146.223	77.1998	76.4275	67.8991
Gm31728	0.676648	0.269449	0.231422	0.761067	0.27535	0.576493
Gm39713	0	0	0	0	0	0
Gm5069	0.460603	0	0	0.172689	0.0780975	0
Itpkb	3.44456	0.535806	0.598245	6.65895	6.67999	7.08985
Gm39712	0.0375419	0	0	0	0	0
Stum	0	0	0	0	0.0592799	0
Gm31986	0	0	0	0	0	0
Parp1	76.2217	74.9343	88.1573	66.6305	68.9713	60.2665
Mir6904	0.0371283	0	0	0	0	0
Lin9	12.7152	8.86822	13.3687	16.0477	14.9286	15.116
Mixl1	0	0	0	0	0	0.117812
Acbd3	29.6869	34.0425	38.3714	21.5323	24.3446	29.7976
Gm38293	0.264844	0.13183	0	0.0744715	0.0673585	0.0650892
LOC102634584	0.055142	0.0274477	0	0.155054	0.0280488	0.0813116
H3f3a	266.549	239.112	190.982	538.91	466.766	444.955
G370120E05Rik	0.113678	0.226339	0.136078	0.511442	0.393204	0.357607
Sde2	29.6393	20.702	31.9825	19.6529	21.6821	19.7641
Gm39714	0	0.0117543	0	0.199202	0.34834	0.348211
Lefty2	0	0	0	0	0	0
Pycr2	47.4257	27.5544	37.3408	33.3019	34.72	29.2623
Gm32199	0	0.0488737	0.125929	0.055218	0.049944	0
Gm39715	0.0415237	0.062007	0.0710081	0	0.063365	0.10205
Lefty1	7.19426	5.70729	6.10327	9.54582	8.46253	6.74086
Tmem63a	23.5939	20.9336	19.584	22.9187	22.1714	21.8763
Ephx1	0.0397852	0.158429	0.0340176	9.30775	10.402	9.1129
9130409I23Rik	0	0	0	0.219374	0	0.479342
Gm39716	0.0585229	0	0.100078	0	0	0
Gm37406	0	0	0	0	0	0
Nvl	70.2784	65.3214	74.6955	41.0479	42.644	40.6743
Cnih4	21.2814	14.9266	22.8487	28.5605	31.9832	31.2623
Wdr26	830.59	840.403	629.093	946.95	993.303	1126.82
Gm38664	0.681566	0	0.43707	0.383299	1.38676	0.837523
A430110L20Rik	0.433338	0.30198	0.185259	0.2437	0.220424	0.212998
Gm39718	0	0	0	0	0	0
Gm39717	0	0	0	0.13215	0	0
Cnih3	0	0	0.038314	0	0	0
Ccdc121	0	0	0	0	0	0
Gm32767	0	0	0	0	0	0
LOC108167841	0	0	0	0	0	0
Dnah14	0.119899	0.221674	0.21968	0.404573	0.365931	0.387279
Gm33612	0	0	0	0	0	0
Lbr	190.98	154.796	183.491	365.822	334.565	398.874
Gm33669	0	0	0	0	0	0.0247561
Enah	0	0	0	0	0.419205	0.303812
Gm38648	0	0	0	0	0	0
Gm39719	0	0	0	0	0	0
Gm33725	0	0	0	0	0	0
Srp9	20.5391	21.1711	21.478	33.4053	28.6614	26.8024
Vmn1r1	0	0	0	0	0	0
LOC105244034	2.15115	0.896455	2.5237	2.08192	2.85005	2.70486
Degs1	4.22948	4.25938	3.32284	9.16957	8.90488	8.70129
1700047M11Rik	0	0.290518	0	0.919046	1.12815	1.43439
Fbxo28	7.81069	9.26102	9.82999	8.94967	7.49965	7.96594
Trp53bp2	9.23038	11.0168	10.4649	7.05514	7.98958	7.16896
Capn2	0.043407	0.23335	0.0668059	0.507754	0.715381	0.759554
LOC108167751	0	0	0	0.0167793	0.0303533	0.0146653
LOC108167842	0	0	0	0	0	0
Capn8	0	0	0	0	0	0
Ccdc185	0	0	0	0	0	0
Susd4	0	0	0	0	0	0
Tlr5	0	0.0183527	0	0.0345585	0.0625154	0.0543683
Gm33747	0	0.0806727	0	0.091145	0.0824395	0
Disp1	1.56957	3.56583	3.7164	2.30859	2.53846	2.53207
Gm34287	0	0	0	0	0	0
Brox	6.36581	5.63172	6.04902	5.77614	5.63261	5.06159
Aida	21.9682	17.7314	18.2291	18.2743	16.9945	19.159
Mia3	18.8571	20.9301	21.8446	22.2359	22.5874	25.1154
Gm34102	0.617925	0.496098	0.306781	0.179359	0.506963	0.509479
Taf1a	8.28216	4.97225	8.8654	2.34664	3.21592	4.102
Hhipl2	0.280514	0.27926	0.0599622	0.0788778	0.071344	0.0689404
Gm33973	0	0	0	0.0670985	0.303449	0.410516
Gm39724	0	0	0	0	0	0
Gm34068	0	0	0	0	0	0
Gm34130	0	0	0	0	0	0
Gm39725	0	0	0	0	0	0
1700056E22Rik	2.03835	1.15956	0.547754	0.524035	0.473983	0.916029
Dusp10	18.3869	10.588	4.98357	2.43304	1.71162	2.71721
Gm34177	0	0	0	0	0	0
Gm34229	0	0	0	0	0	0
1700112H15Rik	0	0	0	0	0	0
4930488B22Rik	0	0	0	0	0	0
Hlx	0.0664968	0.926792	0.454855	6.88094	8.6591	10.3939
Gm34342	0	0	0	0	0.111285	0
2023-03-01	0	0.0359115	0	0	0	0
2023-03-02	28.2645	38.3701	29.1626	32.9605	31.275	26.9737
Mir1981	0	0	0	0	0	0
Gm34451	2.6714	2.49324	0.571033	0.938963	0.339712	0.984802
Gm39727	0	0	0	0.0134063	0	0
C130074G19Rik	0	0	0	0.0171227	0.00774362	0
Gm34602	0	0	0	0	0	0
Mark1	0	0.171389	0	0.0968189	0.0875715	0.0846212
Gm39728	0	0	0	0	0	0
Gm34732	0	0	0	0	0	0
Gm37662	0	0	0	0	0	0
Gm34797	0	0	0	0	0	0
Rab3gap2	184.298	181.861	146.087	149.912	159.648	145.354
Snora36b	0	0	0	0	0	0
Mir664	0	0	0	0	0	0
Gm34882	0.174245	1.0408	0.595941	0.195984	0.531795	0
Iars2	99.1815	101.956	101.313	63.6229	63.5171	58.2414
Mir194-1	0.034592	0.0344373	0	0.0389076	0	0.0680118
Mir215	0	0.234829	0.201688	0	0	0
Bpnt1	3.37885	2.0663	2.80648	1.65589	1.96423	1.42354
Eprs	90.0821	78.1885	110.637	40.8571	40.9782	36.8719
9630028B13Rik	0	0	0	0	0.00964294	0
Gm2061	0.136241	0.813793	0.0388302	0.715114	0.693013	1.07146
Slc30a10	14.0363	33.5855	0.210552	25.5507	20.8557	28.0206
Gm34969	0	0	0	0	0	0
5033404E19Rik	0	0	0	0	0	0
Gm35023	0	0	0	0	0	0
Gm39729	0	0.0891082	0	0	0	0
Lyplal1	0.0916573	0.889663	0	0.0257731	0.139869	0.0225261
Gm35201	0	0	0	0	0	0
Gm35341	0	0	0	0	0	0
Gm35426	0	0	0	0	0	0
A730004F24Rik	0	0	0	0	0	0
Gm35546	0	0	0	0	0	0
Tgfb2	0.0353632	0	0.0604733	0.198875	0.0359761	0.0347641
Gm35655	0	0	0	0	0	0
Rrp15	62.7577	56.6548	89.5292	31.1191	32.838	22.6655
A430105J06Rik	0.230547	0.229516	0.262834	0.25931	0.078181	0
Gm39732	0	0	0	0	0	0
1700023G09Rik	0	0	0	0	0	0
Gm39731	0	0	0	0	0	0
D1Pas1	0	0	0	0	0	0
Spata17	0.195868	0	0	0	0	0
Gm15509	0	0	0	0	0	0
1700007P06Rik	0	0	0	0	0	0
Gpatch2	8.6748	7.9136	8.85555	5.34227	4.69779	4.83135
Gm37896	0	0	0	0	0	0
Gm36249	0	0	0	0	0	0
Gm36388	0	0	0	0	0	0
LOC108167753	0	0	0	0	0	0
Esrrg	0	0	0	0	0	0
LOC108167752	0	0	0	0	0	0
9330162B11Rik	0	0	0	0	0	0
Ush2a	0.0519296	0.155092	0	0	0	0
Gm39735	0	0	0	0	0	0
Gm36456	0	0	0	0	0	0
Kctd3	10.6266	12.6349	16.1121	12.775	15.9754	14.1684
Gm36561	0	0	0	0	0	0
Kcnk2	0	0	0	0	0.112425	0
Gm3837	8.89403	12.2835	12.5296	12.1632	10.7142	9.07642
LOC108167754	0	0	0	0	0	0
Gm30088	0	0	0	0	0	0
Cenpf	177.314	126.559	131.458	208.791	177.002	219.42
Ptpn14	3.38294	3.42044	0.542348	0.445898	0.59152	0.545611
Smyd2	30.77	26.3225	34.2697	9.79099	11.6973	10.3422
Gm39736	0	0	0	0	0	0
[truncated: 33,977 more rows]

## Sheet: AM ChIP seq
chromosome name	start	end	width	SYMBOL	fold-change	-log10pvalue	-log10qvalue	annotation	distanceToTSS	ENSEMBL	GENENAME
chr1	143232923	143233253	331	LOC107985200	1.92369	177.183	169.476	Distal Intergenic	186954	ENSG00000232527	uncharacterized LOC107985200
chr18	3261625	3262181	557	MYL12B	14.4101	102.702	95.7473	Promoter (<=1kb)	0	ENSG00000118680	myosin light chain 12B
chr1	143219684	143219954	271	LOC107985200	2.15217	101.5	94.5793	Distal Intergenic	200253	ENSG00000232527	uncharacterized LOC107985200
chr1	124673081	124673373	293	LINC01691	3.03195	87.6675	80.9809	Distal Intergenic	-3092557	NA	long intergenic non-protein coding RNA 1691
chr1	125182314	125182669	356	LINC01691	1.54816	86.0352	79.3778	Distal Intergenic	-3601790	NA	long intergenic non-protein coding RNA 1691
chr17	40322644	40323194	551	RARA	23.2861	77.9486	71.3868	Promoter (<=1kb)	0	ENSG00000131759	retinoic acid receptor alpha
chr1	143262120	143262883	764	LOC107985200	1.7683	77.2101	70.6714	Distal Intergenic	157324	ENSG00000232527	uncharacterized LOC107985200
chr19	11383987	11384766	780	EPOR	11.2078	70.1841	63.7635	Promoter (<=1kb)	0	ENSG00000187266	erythropoietin receptor
chr19	39412506	39412881	376	PLEKHG2	11.1779	59.6459	53.4312	Promoter (<=1kb)	0	ENSG00000090924	pleckstrin homology and RhoGEF domain containing G2
chr17	43246010	43246782	773	RNU2-1	4.79278	56.9882	50.8324	Intron (ENST00000594691.6/100874261, intron 1 of 3)	-12033	ENSG00000274585	RNA, U2 small nuclear 1
chr1	143214314	143214824	511	LOC107985200	1.4448	56.9049	50.7515	Distal Intergenic	205383	ENSG00000232527	uncharacterized LOC107985200
chr1	143230172	143230449	278	LOC107985200	2.25295	56.0919	49.9541	Distal Intergenic	189758	ENSG00000232527	uncharacterized LOC107985200
chr19	47243708	47244440	733	BBC3	11.832	55.7809	49.6475	Exon (ENST00000701637.1/ENST00000701637.1, exon 1 of 1)	-10942	ENSG00000105327	BCL2 binding component 3
chr11	70398308	70398957	650	CTTN	15.6772	52.2075	46.1344	Promoter (<=1kb)	0	ENSG00000085733	cortactin
chr19	4182111	4182691	581	ANKRD24	12.2513	50.8627	44.8171	Promoter (<=1kb)	0	ENSG00000089847	ankyrin repeat domain 24
chr1	143254521	143254956	436	LOC107985200	1.90616	49.1942	43.1856	Distal Intergenic	165251	ENSG00000232527	uncharacterized LOC107985200
chr1	125180024	125180495	472	LINC01691	1.27398	48.4504	42.4529	Distal Intergenic	-3599500	NA	long intergenic non-protein coding RNA 1691
chr1	66924960	66925282	323	MIER1	15.2648	46.1024	40.1471	Promoter (<=1kb)	0	ENSG00000198160	MIER1 transcriptional regulator
chr12	110449936	110450450	515	ARPC3	13.627	45.7253	39.7833	Promoter (<=1kb)	0	ENSG00000111229	actin related protein 2/3 complex subunit 3
chr21	38376435	38376927	493	LINC01423	11.947	43.3503	37.4663	Distal Intergenic	-43014	NA	long intergenic non-protein coding RNA 1423
chr19	25961773	25962047	275	LOC105372345	2.77532	43.0628	37.1896	Distal Intergenic	1723208	NA	uncharacterized LOC105372345
chr21	8220328	8220693	366	RNA5-8SN2	3.3576	42.8769	37.0074	Intron (ENST00000623664.1/107987293, intron 2 of 6)	7756	ENSG00000278233	RNA, 5.8S ribosomal N2
chr19	13103994	13104740	747	LYL1	10.1216	42.4639	36.6021	Promoter (<=1kb)	-833	ENSG00000104903	LYL1 basic helix-loop-helix family member
chr1	169893311	169894285	975	SCYL3	13.9493	42.0976	36.2505	Promoter (<=1kb)	0	ENSG00000000457	SCY1 like pseudokinase 3
chr7	129054750	129055293	544	TNPO3	12.8408	41.9502	36.1091	Promoter (<=1kb)	0	ENSG00000064419	transportin 3
chr1	125178944	125179345	402	LINC01691	1.40962	41.5803	35.7482	Distal Intergenic	-3598420	NA	long intergenic non-protein coding RNA 1691
chrUn_GL000220v1	119728	120096	369	RNA5-8SN5	2.89646	40.7405	34.9323	Distal Intergenic	7703	ENSG00000274917	RNA, 5.8S ribosomal N5
chr22	39520224	39520937	714	ATF4	8.93937	40.0779	34.291	Promoter (<=1kb)	0	ENSG00000128272	activating transcription factor 4
chr17	43284395	43285051	657	CCDC200	5.90193	40.0336	34.2489	Intron (ENST00000594691.6/100874261, intron 1 of 3)	18205	ENSG00000236383	coiled-coil domain containing 200
chr19	47729677	47730263	587	EHD2	9.61549	39.2275	33.4753	Promoter (<=1kb)	60	ENSG00000024422	EH domain containing 2
chr3	47282404	47282886	483	KIF9	10.7806	37.9881	32.2689	Promoter (<=1kb)	0	ENSG00000088727	kinesin family member 9
chr17	43273633	43274019	387	CCDC200	6.16911	37.7417	32.0316	Intron (ENST00000594691.6/100874261, intron 1 of 3)	29237	ENSG00000236383	coiled-coil domain containing 200
chr15	101961309	101961898	590	WASH3P	7.54812	37.3744	31.6756	Promoter (<=1kb)	0	NA	WASP family homolog 3, pseudogene
chr16	46394591	46394888	298	ANKRD26P1	1.80791	36.9891	31.3035	Distal Intergenic	83551	NA	ankyrin repeat domain 26 pseudogene 1
chr1	143184825	143185404	580	LOC107985200	1.95611	36.9617	31.2762	Distal Intergenic	234803	ENSG00000232527	uncharacterized LOC107985200
chr12	131710764	131711118	355	SFSWAP	7.71153	35.9548	30.3018	Promoter (<=1kb)	0	ENSG00000061936	splicing factor SWAP
chr20	1393084	1393456	373	FKBP1A-SDCBP2	12.8536	35.8184	30.1729	Promoter (<=1kb)	0	NA	FKBP1A-SDCBP2 readthrough (NMD candidate)
chr22	19478970	19479435	466	UFD1	11.6829	35.5041	29.8742	Promoter (<=1kb)	0	ENSG00000070010	ubiquitin recognition factor in ER associated degradation 1
chr19	46713908	46714344	437	PRKD2	9.57131	34.9941	29.3803	Promoter (<=1kb)	0	ENSG00000105287	protein kinase D2
chr17	43241722	43242110	389	RNU2-1	7.79653	34.7175	29.1106	Intron (ENST00000594691.6/100874261, intron 1 of 3)	-7745	ENSG00000274585	RNA, U2 small nuclear 1
chr17	59619315	59620239	925	CLTC	11.2685	34.6415	29.0361	Promoter (<=1kb)	0	ENSG00000141367	clathrin heavy chain
chr3	129161083	129161528	446	ISY1	12.5556	34.5845	28.9829	Promoter (<=1kb)	-20	ENSG00000240682	ISY1 splicing factor homolog
chr10	92690088	92690997	910	HHEX	11.4709	34.4208	28.8274	Promoter (<=1kb)	133	ENSG00000152804	hematopoietically expressed homeobox
chr19	58305155	58305707	553	ERVK3-1	10.1771	34.0948	28.5112	Promoter (<=1kb)	0	ENSG00000142396	endogenous retrovirus group K3 member 1
chr17	43300230	43300951	722	CCDC200	5.25856	33.8405	28.2654	Promoter (2-3kb)	2305	ENSG00000236383	coiled-coil domain containing 200
chr19	48469358	48469956	599	CYTH2	10.8469	33.1208	27.5772	Promoter (<=1kb)	0	ENSG00000105443	cytohesin 2
chr4	145618973	145619449	477	MMAA	9.95586	32.9778	27.4396	Promoter (<=1kb)	0	ENSG00000151611	metabolism of cobalamin associated A
chr19	12163089	12163506	418	ZNF136	4.33759	32.7874	27.2562	Promoter (<=1kb)	0	ENSG00000196646	zinc finger protein 136
chr8	144078175	144079036	862	EXOSC4	7.63368	32.6511	27.1239	Promoter (<=1kb)	0	ENSG00000178896	exosome component 4
chr8	30743801	30744567	767	UBXN8	11.8896	32.0177	26.5132	Promoter (<=1kb)	0	ENSG00000104691	UBX domain protein 8
chr21	8402632	8402926	295	RNA5-8SN3	3.4685	31.9802	26.4801	Intron (ENST00000623860.3/105379508, intron 2 of 6)	7025	ENSG00000275215	RNA, 5.8S ribosomal N3
chr19	44954945	44955277	333	CLPTM1	10.0058	31.3004	25.8298	Promoter (<=1kb)	-103	ENSG00000104853	CLPTM1 regulator of GABA type A receptor forward trafficking
chr7	143380597	143381263	667	FAM131B-AS2	9.48694	31.2903	25.8204	Promoter (<=1kb)	0	NA	FAM131B antisense RNA 2
chr8	2178384	2178763	380	LOC105377781	10.4823	31.1187	25.6545	Intron (ENST00000685917.2/105377781, intron 1 of 1)	21701	NA	uncharacterized LOC105377781
chr1	2255301	2256563	1263	SKI	11.0733	31.0822	25.6201	Intron (ENST00000378536.5/6497, intron 1 of 6)	7305	ENSG00000157933	SKI proto-oncogene
chr2	238426691	238427399	709	ASB1	8.26595	30.9387	25.4813	Promoter (<=1kb)	0	ENSG00000065802	ankyrin repeat and SOCS box containing 1
chr7	123748856	123749425	570	WASL-DT	8.82516	30.8011	25.3522	Promoter (<=1kb)	0	ENSG00000272686	WASL divergent transcript
chr4	186191220	186191909	690	CYP4V2	6.45647	30.7793	25.3322	Promoter (<=1kb)	0	ENSG00000145476	cytochrome P450 family 4 subfamily V member 2
chr7	97872039	97872541	503	ASNS	11.5682	30.7735	25.3264	Promoter (<=1kb)	0	ENSG00000070669	asparagine synthetase (glutamine-hydrolyzing)
chr14	24242304	24242681	378	TINF2	10.5961	30.7426	25.3014	Promoter (<=1kb)	0	ENSG00000092330	TERF1 interacting nuclear factor 2
chr21	8213911	8214303	393	RNA5-8SN2	4.08556	30.703	25.2642	Promoter (1-2kb)	1339	ENSG00000278233	RNA, 5.8S ribosomal N2
chr19	41882813	41883633	821	ARHGEF1	7.43642	30.5153	25.0812	Promoter (<=1kb)	0	ENSG00000076928	Rho guanine nucleotide exchange factor 1
chr17	67366224	67366664	441	PSMD12	10.2202	29.9655	24.5478	Promoter (<=1kb)	0	ENSG00000197170	proteasome 26S subunit, non-ATPase 12
chr19	49867107	49867675	569	PNKP	7.56212	29.9141	24.5008	Promoter (<=1kb)	0	ENSG00000039650	polynucleotide kinase 3'-phosphatase
chr2	200811470	200811783	314	BZW1	9.84363	29.7595	24.3545	Promoter (<=1kb)	0	ENSG00000082153	basic leucine zipper and W2 domains 1
chr19	41859778	41860095	318	RPS19	8.0291	29.7498	24.3461	Promoter (<=1kb)	-160	ENSG00000105372	ribosomal protein S19
chr17	43278510	43278863	354	CCDC200	4.58209	29.2384	23.8542	Intron (ENST00000594691.6/100874261, intron 1 of 3)	24393	ENSG00000236383	coiled-coil domain containing 200
chr19	53868931	53869523	593	MYADM-AS1	8.22117	29.2252	23.842	Promoter (<=1kb)	0	NA	MYADM antisense RNA 1
chr19	13952441	13953002	562	DCAF15	9.05571	29.1333	23.7527	Promoter (<=1kb)	0	ENSG00000132017	DDB1 and CUL4 associated factor 15
chrX	115732395	115732927	533	PLS3	3.09489	28.9768	23.6007	Intron (ENST00000664453.1/642776, intron 1 of 3)	92091	ENSG00000102024	plastin 3
chr20	45971991	45972460	470	ZNF335	7.08841	28.9091	23.5371	Promoter (<=1kb)	0	ENSG00000198026	zinc finger protein 335
chr2	86562913	86563332	420	CHMP3	8.42276	28.6847	23.3234	Promoter (<=1kb)	0	ENSG00000115561	charged multivesicular body protein 3
chr9	136655890	136656564	675	EGFL7	8.42276	28.6847	23.3234	Promoter (2-3kb)	-2292	ENSG00000172889	EGF like domain multiple 7
chr20	21302984	21303804	821	XRN2	9.81387	28.5213	23.171	Promoter (<=1kb)	0	ENSG00000088930	5'-3' exoribonuclease 2
chr3	52287732	52288290	559	GLYCTK	9.81387	28.5213	23.171	Promoter (<=1kb)	0	ENSG00000168237	glycerate kinase
chr19	45423586	45423943	358	ERCC1	8.56421	28.5	23.152	Promoter (<=1kb)	0	ENSG00000012061	ERCC excision repair 1, endonuclease non-catalytic subunit
chr1	183472003	183472710	708	SMG7	11.3006	28.397	23.0528	Promoter (<=1kb)	0	ENSG00000116698	SMG7 nonsense mediated mRNA decay factor
chr22_KI270733v1_random	163228	163893	666	RNA5-8SN4	3.05845	28.0968	22.7698	Distal Intergenic	34351	ENSG00000276700	RNA, 5.8S ribosomal N4
chr22_KI270733v1_random	168105	168747	643	RNA5-8SN4	2.90467	27.82	22.503	Distal Intergenic	39228	ENSG00000276700	RNA, 5.8S ribosomal N4
chr18	9136277	9136999	723	NDUFV2-AS1	9.69611	27.6921	22.3806	Promoter (<=1kb)	0	ENSG00000266053	NDUFV2 antisense RNA 1
chr21	8212442	8213233	792	RNA5-8SN2	3.98638	27.6437	22.3359	Promoter (<=1kb)	0	ENSG00000278233	RNA, 5.8S ribosomal N2
chr16	89657502	89657834	333	SPATA33	7.06499	27.4074	22.1084	Promoter (<=1kb)	0	ENSG00000167523	spermatogenesis associated 33
chr19	17215367	17215671	305	USE1	5.61908	27.2955	22.0002	Promoter (<=1kb)	0	ENSG00000053501	unconventional SNARE in the ER 1
chr8	23246509	23247130	622	CHMP7	10.3104	27.1549	21.8683	Promoter (<=1kb)	0	ENSG00000147457	charged multivesicular body protein 7
chr13	74575676	74575980	305	LINC00347	7.59118	26.999	21.7195	Distal Intergenic	21711	ENSG00000236678	long intergenic non-protein coding RNA 347
chr19	47256008	47256631	624	CCDC9	8.73337	26.7239	21.4555	Promoter (<=1kb)	0	ENSG00000105321	coiled-coil domain containing 9
chrUn_GL000220v1	122357	123008	652	RNA5-8SN5	2.58211	26.5085	21.2504	Distal Intergenic	10332	ENSG00000274917	RNA, 5.8S ribosomal N5
chr1	173868237	173868668	432	ZBTB37	8.62841	26.4834	21.2268	Promoter (<=1kb)	0	ENSG00000185278	zinc finger and BTB domain containing 37
chr5	138575380	138575693	314	HSPA9	9.29735	26.2878	21.0362	Promoter (<=1kb)	0	ENSG00000113013	heat shock protein family A (Hsp70) member 9
chr19	48321559	48322546	988	ODAD1	8.31553	26.2859	21.0351	Promoter (<=1kb)	0	ENSG00000105479	outer dynein arm docking complex subunit 1
chr19	13102748	13103229	482	LYL1	6.67947	26.1884	20.9419	Promoter (<=1kb)	0	ENSG00000104903	LYL1 basic helix-loop-helix family member
chr12	105235845	105236456	612	APPL2	9.50932	26.1568	20.9127	Promoter (<=1kb)	0	ENSG00000136044	adaptor protein, phosphotyrosine interacting with PH domain and leucine zipper 2
chr1	200669651	200670301	651	DDX59	9.74456	26.0536	20.8141	Promoter (<=1kb)	0	ENSG00000118197	DEAD-box helicase 59
chr1	204461059	204461977	919	PIK3C2B	10.0071	25.9838	20.7493	Intron (ENST00000367187.7/5287, intron 6 of 33)	-4768	ENSG00000133056	phosphatidylinositol-4-phosphate 3-kinase catalytic subunit type 2 beta
chr12	49741493	49741836	344	TMBIM6	10.6157	25.9384	20.7081	Promoter (<=1kb)	0	ENSG00000139644	transmembrane BAX inhibitor motif containing 6
chr19	44856516	44857135	620	NECTIN2	8.58304	25.8388	20.6145	Intron (ENST00000252485.8/5819, intron 1 of 5)	10219	ENSG00000130202	nectin cell adhesion molecule 2
chr1	122759242	122759563	322	LINC01691	6.06137	25.8122	20.5888	Distal Intergenic	-1178718	NA	long intergenic non-protein coding RNA 1691
chr21	8450884	8451671	788	RNA5-8SN1	2.61345	25.7139	20.4946	Exon (ENST00000651813.1/107987294, exon 4 of 7)	11061	ENSG00000278189	RNA, 5.8S ribosomal N1
chr11	61161191	61161681	491	VPS37C	7.84848	25.6585	20.4407	Promoter (<=1kb)	0	ENSG00000167987	VPS37C subunit of ESCRT-I
chr10	102394050	102394361	312	NFKB2	6.93615	25.601	20.3878	Promoter (<=1kb)	0	ENSG00000077150	nuclear factor kappa B subunit 2
chr8	144508404	144509093	690	MFSD3	6.93615	25.601	20.3878	Promoter (<=1kb)	0	ENSG00000167700	major facilitator superfamily domain containing 3
chr17	80415142	80415621	480	RNF213-AS1	7.43073	25.5683	20.3568	Promoter (<=1kb)	0	ENSG00000263069	RNF213 antisense RNA 1
chr22_KI270733v1_random	139052	140345	1294	RNA5-8SN4	2.51581	25.4593	20.2526	Distal Intergenic	10175	ENSG00000276700	RNA, 5.8S ribosomal N4
chr20	46364084	46364497	414	SLC35C2	8.40717	25.4378	20.2322	Promoter (<=1kb)	0	ENSG00000080189	solute carrier family 35 member C2
chr3	57555991	57556285	295	PDE12	8.40717	25.4378	20.2322	Promoter (<=1kb)	0	ENSG00000174840	phosphodiesterase 12
chr20	31723336	31723987	652	BCL2L1	9.994	25.3769	20.1737	Promoter (<=1kb)	0	ENSG00000171552	BCL2 like 1
chr2	201116419	201117119	701	CFLAR	9.38408	25.3356	20.1358	Promoter (<=1kb)	0	ENSG00000003402	CASP8 and FADD like apoptosis regulator
chr11	18526653	18527101	449	TSG101	7.25379	25.0853	19.8963	Promoter (<=1kb)	0	ENSG00000074319	tumor susceptibility 101
chr14	73886620	73887230	611	ZNF410	9.23763	25.0399	19.8541	Promoter (<=1kb)	0	ENSG00000119725	zinc finger protein 410
chr2	190881322	190882003	682	GLS	9.96153	24.7373	19.5639	Promoter (<=1kb)	167	ENSG00000115419	glutaminase
chr10	28532047	28533172	1126	WAC-AS1	10.2733	24.7295	19.5574	Promoter (<=1kb)	0	NA	WAC antisense RNA 1 (head to head)
chr20	49188209	49188555	347	STAU1	10.2733	24.7295	19.5574	Promoter (<=1kb)	0	ENSG00000124214	staufen double-stranded RNA binding protein 1
chr10	104338345	104338771	427	ITPRIP	6.91694	24.6105	19.4481	Promoter (<=1kb)	0	ENSG00000148841	inositol 1,4,5-trisphosphate receptor interacting protein
chr1	40040076	40041194	1119	CAP1	8.90994	24.3695	19.2167	Promoter (<=1kb)	0	ENSG00000131236	cyclase associated actin cytoskeleton regulatory protein 1
chr6	52576971	52577646	676	TRAM2-AS1	8.90994	24.3695	19.2167	Promoter (<=1kb)	0	ENSG00000225791	TRAM2 antisense RNA 1 (head to head)
chr19	41327376	41328053	678	CCDC97	6.96951	24.2931	19.1437	Intron (ENST00000598758.5/7040, intron 2 of 3)	7643	ENSG00000142039	coiled-coil domain containing 97
chr17	43251639	43252250	612	RNU2-1	6.0946	24.245	19.0978	Exon (ENST00000613119.1/ENST00000613119.1, exon 1 of 1)	-17662	ENSG00000274585	RNA, U2 small nuclear 1
chr19	10194246	10194947	702	DNMT1	5.83264	24.1471	19.004	Promoter (<=1kb)	0	ENSG00000130816	DNA methyltransferase 1
chr6	149546005	149546384	380	PPIL4	7.0851	24.1432	19.0009	Promoter (<=1kb)	0	ENSG00000131013	peptidylprolyl isomerase like 4
chr4	140150447	140151752	1306	MAML3	5.60972	24.1085	18.9689	Promoter (1-2kb)	1217	ENSG00000196782	mastermind like transcriptional coactivator 3
chr21	43776276	43776648	373	CSTB	8.78083	24.1018	18.9634	Promoter (<=1kb)	0	ENSG00000160213	cystatin B
chr12	132828826	132829189	364	GOLGA3	7.4822	23.7343	18.6105	Promoter (<=1kb)	0	ENSG00000090615	golgin A3
chr6	136822548	136822879	332	PEX7	7.08511	23.6691	18.5509	Promoter (<=1kb)	0	ENSG00000112357	peroxisomal biogenesis factor 7
chr6	147204307	147204769	463	STXBP5	9.65815	23.603	18.488	Promoter (<=1kb)	0	ENSG00000164506	syntaxin binding protein 5
chr12	56041844	56042144	301	RPS26	6.27052	23.5463	18.4349	Promoter (<=1kb)	0	ENSG00000197728	ribosomal protein S26
chr5	48498082	48498353	272	EMB	5.01736	23.4998	18.3912	Distal Intergenic	1913645	ENSG00000170571	embigin
chr21	39313617	39314147	531	BRWD1-AS2	5.1585	23.4032	18.2975	Promoter (<=1kb)	0	ENSG00000255568	BRWD1 antisense RNA 2
chr11	68271855	68272475	621	LOC105369363	7.96468	23.3806	18.2765	Promoter (<=1kb)	0	ENSG00000286369	uncharacterized LOC105369363
chr11	62791619	62792341	723	TMEM223	8.64788	23.2865	18.1893	Promoter (<=1kb)	0	ENSG00000168569	transmembrane protein 223
chr17	41688932	41689278	347	EIF1	8.64788	23.2865	18.1893	Promoter (<=1kb)	0	ENSG00000173812	eukaryotic translation initiation factor 1
chr18	35240743	35241289	547	ZNF397	8.64788	23.2865	18.1893	Promoter (<=1kb)	0	ENSG00000186812	zinc finger protein 397
chr22_KI270733v1_random	176555	176902	348	RNA5-8SN4	3.45434	23.2462	18.1539	Distal Intergenic	47678	ENSG00000276700	RNA, 5.8S ribosomal N4
chr2	61177434	61177865	432	AHSA2P	8.52257	23.0273	17.9438	Promoter (<=1kb)	0	ENSG00000173209	activator of HSP90 ATPase homolog 2, pseudogene
chr19	17523213	17523826	614	NIBAN3	7.93977	22.813	17.7369	Promoter (<=1kb)	0	ENSG00000167483	niban apoptosis regulator 3
chr2	208266242	208266581	340	PIKFYVE	8.88474	22.6835	17.6158	Promoter (<=1kb)	0	ENSG00000115020	phosphoinositide kinase, FYVE-type zinc finger containing
chr12	6688676	6689518	843	ZNF384	7.87139	22.6593	17.595	Promoter (<=1kb)	0	ENSG00000126746	zinc finger protein 384
chr17	76103471	76103812	342	EXOC7	8.56064	22.5737	17.5123	Promoter (<=1kb)	0	ENSG00000182473	exocyst complex component 7
chr12	6958990	6959519	530	PTPN6	9.09737	22.5496	17.4903	Promoter (<=1kb)	0	ENSG00000111679	protein tyrosine phosphatase non-receptor type 6
chr7	1504017	1504542	526	INTS1	9.31885	22.4162	17.3654	Promoter (<=1kb)	0	ENSG00000164880	integrator complex subunit 1
chr10	5813632	5814025	394	GDI2	7.74344	22.3696	17.322	Promoter (<=1kb)	-198	ENSG00000057608	GDP dissociation inhibitor 2
chr12	389019	389542	524	KDM5A	7.74344	22.3696	17.322	Promoter (<=1kb)	0	ENSG00000073614	lysine demethylase 5A
chr20	833610	833906	297	FAM110A	7.74344	22.3696	17.322	Promoter (<=1kb)	0	ENSG00000125898	family with sequence similarity 110 member A
chr18	5237721	5238149	429	LINC00667	9.58838	22.3547	17.3116	Promoter (<=1kb)	0	ENSG00000263753	long intergenic non-protein coding RNA 667
chr19	32405087	32405901	815	DPY19L3	6.74771	22.2898	17.2514	Promoter (<=1kb)	0	ENSG00000178904	dpy-19 like C-mannosyltransferase 3
chr17	48944547	48944885	339	SNF8	8.38583	22.2164	17.1809	Promoter (<=1kb)	0	ENSG00000159210	SNF8 subunit of ESCRT-II
chr19	16888536	16889433	898	F2RL3	7.00721	22.0501	17.0241	Promoter (<=1kb)	0	ENSG00000127533	F2R like thrombin or trypsin receptor 3
chr1	24848168	24848901	734	MIR6731	8.26431	21.9658	16.9442	Distal Intergenic	70515	ENSG00000278034	microRNA 6731
chr22	50672184	50672753	570	SHANK3	6.7395	21.8116	16.7961	Promoter (<=1kb)	0	ENSG00000251322	SH3 and multiple ankyrin repeat domains 3
chr4	185203630	185204033	404	CFAP97	7.08277	21.7706	16.7574	Promoter (<=1kb)	0	ENSG00000164323	cilia and flagella associated protein 97
chr20	2470301	2470852	552	SNRPB	8.42254	21.7661	16.7553	Promoter (<=1kb)	0	ENSG00000125835	small nuclear ribonucleoprotein polypeptides B and B1
chr19	25908387	25908688	302	HAVCR1P1	4.92858	21.7032	16.6952	Distal Intergenic	-1744903	ENSG00000268442	hepatitis A virus cellular receptor 1 pseudogene 1
chr12	123383587	123383870	284	KMT5A	8.79413	21.4326	16.4359	Promoter (<=1kb)	-262	ENSG00000183955	lysine methyltransferase 5A
chr5	142357026	142357377	352	SPRY4-AS1	8.99751	21.2773	16.2916	Intron (ENST00000700840.1/101926941, intron 3 of 4)	3483	ENSG00000231185	SPRY4 antisense RNA 1
chr1	169794645	169795359	715	C1orf112	9.24594	21.1898	16.2088	Promoter (<=1kb)	0	ENSG00000000460	chromosome 1 open reading frame 112
chr19	57527320	57527692	373	ZNF549	9.24594	21.1898	16.2088	Promoter (<=1kb)	0	ENSG00000121406	zinc finger protein 549
chr5	159262977	159263674	698	UBLCP1	9.24594	21.1898	16.2088	Promoter (<=1kb)	0	ENSG00000164332	ubiquitin like domain containing CTD phosphatase 1
chrX	53422255	53422630	376	SMC1A	9.24594	21.1898	16.2088	Promoter (<=1kb)	24	ENSG00000072501	structural maintenance of chromosomes 1A
chr2	70124143	70124554	412	LINC01816	8.12661	21.1655	16.1889	Promoter (<=1kb)	792	ENSG00000231327	long intergenic non-protein coding RNA 1816
chr1	247210256	247210857	602	NA	8.12377	21.1597	16.1834	Promoter (<=1kb)	0	NA	NA
chrUn_GL000220v1	104404	105849	1446	RNA5-8SN5	3.3025	21.0471	16.0783	Exon (ENST00000619317.1/ENST00000619317.1, exon 1 of 1)	-6176	ENSG00000274917	RNA, 5.8S ribosomal N5
chr21	8234211	8234715	505	MIR6724-2	1.99919	20.9968	16.0298	Distal Intergenic	-14790	ENSG00000274060	microRNA 6724-2
chr17	63698894	63699648	755	LIMD2	8.00605	20.9176	15.9547	Promoter (<=1kb)	0	ENSG00000136490	LIM domain containing 2
chr4	55948882	55949263	382	CEP135	6.89135	20.8267	15.868	Promoter (<=1kb)	0	ENSG00000174799	centrosomal protein 135
chr8	22604615	22605040	426	CCAR2	6.89135	20.8267	15.868	Promoter (<=1kb)	0	ENSG00000158941	cell cycle and apoptosis regulator 2
chr19	11924729	11925558	830	ZNF763	4.24324	20.704	15.751	Promoter (<=1kb)	0	ENSG00000197054	zinc finger protein 763
chr1	162497792	162498209	418	UHMK1	8.15085	20.7017	15.7489	Promoter (<=1kb)	0	ENSG00000152332	U2AF homology motif kinase 1
chr2	53971059	53971483	425	ACYP2	8.15085	20.7017	15.7489	Promoter (<=1kb)	0	ENSG00000170634	acylphosphatase 2
chr3	9792248	9793431	1184	ARPC4-TTLL3	6.97086	20.5579	15.6098	Promoter (<=1kb)	0	ENSG00000250151	ARPC4-TTLL3 readthrough
chr16	88976691	88977644	954	CBFA2T3	8.06692	20.533	15.5857	Promoter (<=1kb)	0	ENSG00000129993	CBFA2/RUNX1 partner transcriptional co-repressor 3
chr12	6724000	6724577	578	COPS7A	8.85611	20.4837	15.5391	Promoter (<=1kb)	0	ENSG00000111652	COP9 signalosome subunit 7A
chr10	26697403	26697697	295	PDSS1	6.41033	20.479	15.5349	Promoter (<=1kb)	-4	ENSG00000148459	decaprenyl diphosphate synthase subunit 1
chr13	75482013	75482458	446	TBC1D4	6.41033	20.479	15.5349	Promoter (<=1kb)	0	ENSG00000136111	TBC1 domain family member 4
chr19	39402588	39403060	473	ZFP36	6.41033	20.479	15.5349	Exon (ENST00000687686.1/ENST00000687686.1, exon 1 of 1)	-3787	ENSG00000128016	ZFP36 ring finger protein
chr7	99558417	99558873	457	TMEM225B	7.7382	20.3598	15.4227	Promoter (<=1kb)	0	ENSG00000244219	transmembrane protein 225B
chr12	123033901	123034203	303	MIR4304	7.94421	20.2846	15.35	Intron (ENST00000280562.9/57605, intron 2 of 24)	-23173	ENSG00000265526	microRNA 4304
chr22_KI270733v1_random	124149	124516	368	RNA5-8SN4	2.646	20.261	15.3272	Distal Intergenic	-4361	ENSG00000276700	RNA, 5.8S ribosomal N4
chr4	176319865	176320607	743	SPCS3	7.04017	20.2566	15.323	Promoter (<=1kb)	0	ENSG00000129128	signal peptidase complex subunit 3
chr17	68512435	68512805	371	PRKAR1A	6.13092	20.1345	15.209	Promoter (<=1kb)	0	ENSG00000108946	protein kinase cAMP-dependent type I regulatory subunit alpha
chr12	51172719	51173108	390	TFCP2	7.62881	20.129	15.2043	Promoter (<=1kb)	0	ENSG00000135457	transcription factor CP2
chr11	128548607	128548885	279	ETS1-AS1	7.86171	20.1166	15.1931	Intron (ENST00000392668.8/2113, intron 3 of 9)	22465	ENSG00000254588	ETS1 antisense RNA 1
chr16	77190938	77191311	374	MON1B	8.9035	20.0406	15.1228	Promoter (<=1kb)	0	ENSG00000103111	MON1 homolog B, secretory trafficking associated
chr1	153990701	153990975	275	RPS27	6.69992	19.8945	14.9825	Promoter (<=1kb)	0	ENSG00000177954	ribosomal protein S27
chr17	81861033	81861527	495	P4HB	6.69992	19.8945	14.9825	Promoter (<=1kb)	-177	ENSG00000185624	prolyl 4-hydroxylase subunit beta
chr19	11596727	11597159	433	ZNF627	5.50127	19.8259	14.9196	Promoter (<=1kb)	-303	ENSG00000198551	zinc finger protein 627
chr10	101061135	101061710	576	KAZALD1	7.96199	19.8167	14.9106	Promoter (<=1kb)	-279	ENSG00000107821	Kazal type serine peptidase inhibitor domain 1
chr1	26280011	26280428	418	SH3BGRL3	7.70967	19.8045	14.8994	Promoter (<=1kb)	0	ENSG00000142669	SH3 domain binding glutamate rich protein like 3
chr20	5950315	5950602	288	TRMT6	6.24163	19.5902	14.6952	Promoter (<=1kb)	0	ENSG00000089195	tRNA methyltransferase 6 non-catalytic subunit
chr19	24930048	24930415	368	HAVCR1P1	2.08537	19.4375	14.548	Distal Intergenic	-766564	ENSG00000268442	hepatitis A virus cellular receptor 1 pseudogene 1
chr1	151059200	151059594	395	CDC42SE1	8.02493	19.437	14.5475	Promoter (<=1kb)	0	ENSG00000197622	CDC42 small effector 1
chr2	32356669	32357092	424	BIRC6	8.02493	19.437	14.5475	Promoter (<=1kb)	0	ENSG00000115760	baculoviral IAP repeat containing 6
chr11	61429566	61430463	898	PPP1R32	7.28552	19.3931	14.5095	Promoter (<=1kb)	0	ENSG00000162148	protein phosphatase 1 regulatory subunit 32
chr14	54488659	54488972	314	GMFB	6.47687	19.3363	14.4549	Promoter (<=1kb)	0	ENSG00000197045	glia maturation factor beta
chrUn_GL000220v1	112081	112355	275	RNA5-8SN5	3.74988	19.2943	14.4161	Promoter (<=1kb)	56	ENSG00000274917	RNA, 5.8S ribosomal N5
chr14	100142405	100142715	311	EVL	7.45296	19.2702	14.3926	Promoter (1-2kb)	1225	ENSG00000196405	Enah/Vasp-like
chr1	225999382	226000074	693	SDE2	7.38272	19.1224	14.2497	Promoter (<=1kb)	-39	ENSG00000143751	SDE2 telomere maintenance homolog
chr9	2016782	2017896	1115	SMARCA2	3.39064	19.0746	14.2076	Promoter (<=1kb)	0	ENSG00000080503	SWI/SNF related, matrix associated, actin dependent regulator of chromatin, subfamily a, member 2
chr15	88621288	88621749	462	AEN	8.3704	19.0742	14.2073	Promoter (<=1kb)	0	ENSG00000181026	apoptosis enhancing nuclease
chr17	58351959	58352526	568	SUPT4H1	8.09365	19.0653	14.1991	Promoter (<=1kb)	0	ENSG00000213246	SPT4 homolog, DSIF elongation factor subunit
chr3	194134770	194135371	602	HES1	6.50849	18.9746	14.1138	Promoter (<=1kb)	-777	ENSG00000114315	hes family bHLH transcription factor 1
chr21	8406722	8407399	678	RNA5-8SN3	2.19632	18.9139	14.0582	Exon (ENST00000623860.3/105379508, exon 4 of 7)	11115	ENSG00000275215	RNA, 5.8S ribosomal N3
chr1	7961640	7962093	454	PARK7	8.56106	18.9077	14.0522	Promoter (<=1kb)	0	ENSG00000116288	Parkinsonism associated deglycase
chr10	26860254	26860664	411	ABI1	8.56106	18.9077	14.0522	Promoter (<=1kb)	228	ENSG00000136754	abl interactor 1
chr15	88546421	88546721	301	DET1	8.56106	18.9077	14.0522	Promoter (<=1kb)	0	ENSG00000140543	DET1 partner of COP1 E3 ubiquitin ligase
chr19	8832035	8832555	521	ZNF558	8.56106	18.9077	14.0522	Promoter (<=1kb)	0	ENSG00000167785	zinc finger protein 558
chr2	233331355	233331758	404	SAG	8.56106	18.9077	14.0522	Promoter (<=1kb)	0	ENSG00000130561	S-antigen visual arrestin
chr5	49545292	49545604	313	EMB	2.26274	18.8671	14.0157	Distal Intergenic	866394	ENSG00000170571	embigin
chr14	104985232	104985958	727	CLBA1	7.48953	18.8627	14.0113	Promoter (<=1kb)	0	ENSG00000140104	clathrin binding box of aftiphilin containing 1
chr18	13464937	13465297	361	LDLRAD4	7.60746	18.6159	13.7751	Promoter (<=1kb)	0	ENSG00000168675	low density lipoprotein receptor class A domain containing 4
chr22_KI270733v1_random	141552	141911	360	RNA5-8SN4	2.09408	18.5751	13.7375	Distal Intergenic	12675	ENSG00000276700	RNA, 5.8S ribosomal N4
chr14	81221133	81221428	296	GTF2A1-AS1	5.72986	18.572	13.7351	Promoter (<=1kb)	0	NA	GTF2A1 antisense RNA 1
chr1	123027149	123027424	276	LINC01691	2.87641	18.5463	13.7109	Distal Intergenic	-1446625	NA	long intergenic non-protein coding RNA 1691
chr2	216109257	216109744	488	XRCC5	8.35756	18.5425	13.7073	Promoter (<=1kb)	0	ENSG00000079246	X-ray repair cross complementing 5
chr1	122683210	122683543	334	LINC01691	3.34543	18.522	13.688	Distal Intergenic	-1102686	NA	long intergenic non-protein coding RNA 1691
chr19	37317857	37318163	307	ZNF875	7.52912	18.4594	13.6272	Promoter (<=1kb)	0	ENSG00000181666	zinc finger protein 875
chr10	96129545	96130649	1105	ZNF518A	6.85848	18.4507	13.6189	Promoter (<=1kb)	0	ENSG00000177853	zinc finger protein 518A
chr19	52190052	52190448	397	PPP2R1A	6.29182	18.4343	13.606	Promoter (<=1kb)	0	ENSG00000105568	protein phosphatase 2 scaffold subunit Aalpha
chr15	38252027	38252449	423	SPRED1	6.62605	18.3696	13.5467	Promoter (<=1kb)	-387	ENSG00000166068	sprouty related EVH1 domain containing 1
chr21	8205582	8206651	1070	MIR6724-1	2.78803	18.1818	13.3646	Promoter (<=1kb)	267	ENSG00000275950	microRNA 6724-1
chr11	64745010	64745336	327	RASGRP2	6.33109	18.1015	13.2895	Promoter (<=1kb)	0	ENSG00000068831	RAS guanyl releasing protein 2
chr2	70086737	70087261	525	ASPRV1	6.33109	18.1015	13.2895	Promoter (<=1kb)	0	ENSG00000179818	aspartic peptidase retroviral like 1
chr14	77376826	77377378	553	TMED8	7.3376	18.0734	13.2627	Promoter (<=1kb)	0	ENSG00000100580	transmembrane p24 trafficking protein family member 8
chr3	128616330	128617125	796	RPN1	8.09838	18.0726	13.2627	Distal Intergenic	10141	ENSG00000163902	ribophorin I
chr12	66169427	66170071	645	TMBIM4	6.31707	18.0671	13.2598	Promoter (<=1kb)	0	ENSG00000155957	transmembrane BAX inhibitor motif containing 4
chr19	55674875	55675485	611	EPN1	5.83494	18.0658	13.2598	Promoter (<=1kb)	0	ENSG00000063245	epsin 1
chr10	40556571	40556845	275	LOC101929373	1.96197	18.0257	13.2233	Distal Intergenic	-1685876	NA	uncharacterized LOC101929373
chr12	132488775	132489846	1072	FBRSL1	7.07001	17.9895	13.1881	Promoter (<=1kb)	0	ENSG00000112787	fibrosin like 1
chr12	54304391	54304672	282	COPZ1	7.53167	17.9818	13.1808	Intron (ENST00000553061.1/ENST00000553061.1, intron 1 of 1)	3171	ENSG00000111481	COPI coat complex subunit zeta 1
chr2	191020109	191020690	582	STAT1	8.04846	17.9814	13.1805	Promoter (<=1kb)	0	ENSG00000115415	signal transducer and activator of transcription 1
chr6	108074500	108074812	313	OSTM1	8.04846	17.9814	13.1805	Promoter (<=1kb)	0	ENSG00000081087	osteoclastogenesis associated transmembrane protein 1
chr21	8204969	8205270	302	MIR6724-1	3.30022	17.9752	13.1754	Promoter (<=1kb)	-45	ENSG00000275950	microRNA 6724-1
chr9	86354118	86354738	621	TUT7	8.03349	17.954	13.1547	Promoter (<=1kb)	0	ENSG00000083223	terminal uridylyl transferase 7
chr19	25963582	25963931	350	LOC105372345	1.82865	17.8919	13.0968	Distal Intergenic	1721324	NA	uncharacterized LOC105372345
chr8	70402285	70402806	522	NCOA2	7.23127	17.8569	13.0632	Promoter (<=1kb)	0	ENSG00000140396	nuclear receptor coactivator 2
chr10	1056477	1056814	338	WDR37	5.90425	17.8475	13.0553	Promoter (<=1kb)	-33	ENSG00000047056	WD repeat domain 37
chr10	110918658	110919062	405	BBIP1	8.21861	17.7917	13.0016	Promoter (<=1kb)	0	ENSG00000214413	BBSome interacting protein 1
chr2	73926860	73927161	302	DGUOK	8.21861	17.7917	13.0016	Promoter (<=1kb)	0	ENSG00000114956	deoxyguanosine kinase
chr7	128739295	128739813	519	CALU	8.21861	17.7917	13.0016	Promoter (<=1kb)	0	ENSG00000128595	calumenin
chr21	36989907	36990244	338	HLCS	5.09956	17.7523	12.9706	Promoter (<=1kb)	0	ENSG00000159267	holocarboxylase synthetase
chr21	8428228	8428582	355	MIR6724-4	2.11629	17.7497	12.9684	Intron (ENST00000651813.1/107987294, intron 2 of 6)	-3948	ENSG00000275692	microRNA 6724-4
chr11	35662742	35663110	369	TRIM44	6.7469	17.7482	12.9669	Promoter (<=1kb)	0	ENSG00000166326	tripartite motif containing 44
chr17	58332579	58333787	1209	MIR142	7.41289	17.7481	12.9669	Promoter (<=1kb)	-56	ENSG00000284353	microRNA 142
chr8	119855568	119856241	674	DSCC1	5.57907	17.741	12.9603	Promoter (<=1kb)	0	ENSG00000136982	DNA replication and sister chromatid cohesion 1
chr19	13838983	13839697	715	MIR23A	5.31631	17.7162	12.9381	Promoter (2-3kb)	-2324	ENSG00000207980	microRNA 23a
chr3	101513065	101513499	435	SENP7	7.33576	17.5954	12.8207	Promoter (<=1kb)	0	ENSG00000138468	SUMO specific peptidase 7
chr21	8389340	8389734	395	MIR6724-3	2.99081	17.5787	12.8053	Promoter (<=1kb)	978	ENSG00000277379	microRNA 6724-3
chr1	202888638	202889093	456	RABIF	6.63724	17.5041	12.7348	Promoter (<=1kb)	56	ENSG00000183155	RAB interacting factor
chr9	136482631	136483088	458	SEC16A	6.63724	17.5041	12.7348	Promoter (<=1kb)	0	ENSG00000148396	SEC16 homolog A, endoplasmic reticulum export factor
chr3	128415891	128416453	563	DNAJB8-AS1	7.0568	17.4981	12.7316	Distal Intergenic	-47141	ENSG00000242049	DNAJB8 antisense RNA 1
chr21	8451986	8452308	323	RNA5-8SN1	2.21149	17.4599	12.6945	Intron (ENST00000651813.1/107987294, intron 5 of 6)	12163	ENSG00000278189	RNA, 5.8S ribosomal N1
chr1	32816927	32817454	528	S100PBP	7.7614	17.4526	12.6873	Promoter (<=1kb)	0	ENSG00000116497	S100P binding protein
chr1	26620231	26620928	698	RPS6KA1	6.41898	17.4459	12.6815	Exon (ENST00000690093.1/ENST00000690093.1, exon 1 of 1)	47961	ENSG00000117676	ribosomal protein S6 kinase A1
chr1	32351193	32351810	618	TSSK3	6.81549	17.4465	12.6815	Promoter (<=1kb)	0	ENSG00000162526	testis specific serine kinase 3
chr11	124800184	124800695	512	MSANTD2-AS1	6.81549	17.4465	12.6815	Promoter (<=1kb)	0	ENSG00000245498	MSANTD2 antisense RNA 1
chr10	11178917	11179187	271	CELF2	8.02326	17.4423	12.6797	Intron (ENST00000637215.1/10659, intron 3 of 14)	13431	ENSG00000048740	CUGBP Elav-like family member 2
chr10	87818009	87818434	426	CFL1P1	7.45172	17.3476	12.5879	Promoter (<=1kb)	0	ENSG00000223820	cofilin 1 pseudogene 1
chr15	89690498	89691081	584	WDR93	7.45172	17.3476	12.5879	Promoter (<=1kb)	0	ENSG00000140527	WD repeat domain 93
chr2	219597558	219598362	805	STK11IP	7.45172	17.3476	12.5879	Promoter (<=1kb)	0	ENSG00000144589	serine/threonine kinase 11 interacting protein
chr3	3126635	3127372	738	TRNT1	7.45172	17.3476	12.5879	Promoter (<=1kb)	0	ENSG00000072756	tRNA nucleotidyl transferase 1
chrUn_GL000220v1	156032	156310	279	RNA5-8SN5	3.33144	17.3153	12.5574	Exon (ENST00000619779.1/ENST00000619779.1, exon 1 of 1)	44007	ENSG00000274917	RNA, 5.8S ribosomal N5
chr21	8392786	8394465	1680	RNA5-8SN3	2.73055	17.2657	12.5093	Promoter (1-2kb)	-1142	ENSG00000275215	RNA, 5.8S ribosomal N3
chr5	48070318	48070598	281	EMB	4.95414	17.2647	12.5085	Distal Intergenic	2341400	ENSG00000170571	embigin
chr2	219542936	219543337	402	CHPF	5.67286	17.2211	12.4661	Promoter (<=1kb)	0	ENSG00000123989	chondroitin polymerizing factor
chr19	45642020	45642464	445	EML2	6.13924	17.2057	12.4517	Promoter (<=1kb)	0	ENSG00000125746	EMAP like 2
chr19	12139901	12140320	420	ZNF20	3.94973	17.2002	12.4465	Promoter (<=1kb)	0	ENSG00000132010	zinc finger protein 20
chr9	120793196	120793690	495	B3GALT9	6.12564	17.1724	12.4191	Promoter (<=1kb)	0	ENSG00000214654	beta-1,3-galactosyltransferase 9
chr11	34051735	34052049	315	CAPRIN1	6.46837	17.1239	12.3765	Promoter (<=1kb)	0	ENSG00000135387	cell cycle associated protein 1
chr15	64095943	64096232	290	SNX1	7.58114	17.1164	12.3696	Promoter (<=1kb)	0	ENSG00000028528	sorting nexin 1
chr19	45039037	45039353	317	CLASRP	5.49395	17.1097	12.3647	Promoter (<=1kb)	0	ENSG00000104859	CLK4 associating serine/arginine rich protein
chr2	113583674	113584528	855	WASH2P	4.30571	17.0947	12.3506	Promoter (<=1kb)	0	ENSG00000146556	WASP family homolog 2, pseudogene
chr19	48249550	48249831	282	CARD8	5.73556	16.9941	12.2546	Promoter (<=1kb)	0	ENSG00000105483	caspase recruitment domain family member 8
chrUn_GL000220v1	157401	157893	493	RNA5-8SN5	3.3487	16.9871	12.2495	Distal Intergenic	45376	ENSG00000274917	RNA, 5.8S ribosomal N5
chr8	143635755	143636282	528	ZNF623	5.17999	16.9248	12.1885	Promoter (<=1kb)	0	ENSG00000183309	zinc finger protein 623
chr11	65477263	65477619	357	LINC02736	5.42829	16.9214	12.1856	Exon (ENST00000701343.1/ENST00000701343.1, exon 1 of 1)	10187	NA	long intergenic non-protein coding RNA 2736
chr19	11383093	11383676	584	EPOR	4.74559	16.8847	12.1527	Promoter (<=1kb)	0	ENSG00000187266	erythropoietin receptor
chr12	26937851	26938311	461	INTS13	7.71215	16.8792	12.1475	Promoter (<=1kb)	0	ENSG00000064102	integrator complex subunit 13
chr2	135985117	135985579	463	DARS1-AS1	7.71215	16.8792	12.1475	Promoter (<=1kb)	0	NA	DARS1 antisense RNA 1
chr2	219279385	219279763	379	DNAJB2	7.71215	16.8792	12.1475	Promoter (<=1kb)	0	ENSG00000135924	DnaJ heat shock protein family (Hsp40) member B2
chr19	56120494	56120854	361	ZNF787	6.73194	16.8179	12.0915	Promoter (<=1kb)	396	ENSG00000142409	zinc finger protein 787
chr4	73258851	73259670	820	ANKRD17-DT	6.52201	16.8067	12.0806	Promoter (<=1kb)	0	NA	ANKRD17 divergent transcript
chrX	115865097	115865409	313	DANT1	5.77914	16.7096	11.9864	Intron (ENST00000689706.1/106029310, intron 1 of 1)	24087	NA	DXZ4 associated non-coding transcript 1, proximal
chr10	88986489	88986915	427	FAS	7.87617	16.6934	11.9706	Promoter (<=1kb)	0	ENSG00000026103	Fas cell surface death receptor
chr20	44885659	44886005	347	YWHAB	5.33797	16.6602	11.9435	Promoter (<=1kb)	0	ENSG00000166913	tyrosine 3-monooxygenase/tryptophan 5-monooxygenase activation protein beta
chr14	24094321	24094648	328	PCK2	6.416	16.5717	11.8578	Promoter (<=1kb)	0	ENSG00000100889	phosphoenolpyruvate carboxykinase 2, mitochondrial
chr20	34872520	34872955	436	GGT7	6.416	16.5717	11.8578	Promoter (<=1kb)	0	ENSG00000131067	gamma-glutamyltransferase 7
chr3	49805835	49806873	1039	MIR5193	6.416	16.5717	11.8578	Promoter (<=1kb)	0	ENSG00000283726	microRNA 5193
chr22_KI270733v1_random	142612	142924	313	RNA5-8SN4	2.69893	16.4658	11.7594	Distal Intergenic	13735	ENSG00000276700	RNA, 5.8S ribosomal N4
chr9	128455779	128456452	674	ODF2	7.73849	16.4482	11.7426	Promoter (<=1kb)	0	ENSG00000136811	outer dense fiber of sperm tails 2
chr12	112409222	112409608	387	RPL6	7.45095	16.3996	11.6959	Promoter (<=1kb)	0	ENSG00000089009	ribosomal protein L6
chr5	47489164	47489463	300	HCN1	2.96086	16.392	11.689	Distal Intergenic	-1792666	ENSG00000164588	hyperpolarization activated cyclic nucleotide gated potassium channel 1
chr22_KI270733v1_random	152746	153043	298	RNA5-8SN4	2.58408	16.3604	11.6586	Distal Intergenic	23869	ENSG00000276700	RNA, 5.8S ribosomal N4
chr22_KI270733v1_random	177719	178006	288	RNA5-8SN4	2.58408	16.3604	11.6586	Distal Intergenic	48842	ENSG00000276700	RNA, 5.8S ribosomal N4
chr1	1658645	1659325	681	CDK11B	7.68896	16.3597	11.6579	Promoter (<=1kb)	0	ENSG00000248333	cyclin dependent kinase 11B
chr2	233251394	233252005	612	ATG16L1	7.16512	16.327	11.6264	Promoter (<=1kb)	0	ENSG00000085978	autophagy related 16 like 1
chr8	11284471	11285180	710	MTMR9	7.16512	16.327	11.6264	Promoter (<=1kb)	0	ENSG00000104643	myotubularin related protein 9
chr19	58182583	58183305	723	ZNF274	5.34134	16.2958	11.598	Promoter (<=1kb)	0	ENSG00000171606	zinc finger protein 274
chr15	99565608	99566017	410	MEF2A	5.93421	16.291	11.5942	Promoter (<=1kb)	0	ENSG00000068305	myocyte enhancer factor 2A
chr10	40595432	40595736	305	LOC101929373	3.23488	16.2284	11.5371	Distal Intergenic	-1646985	NA	uncharacterized LOC101929373
chr2	218367774	218368227	454	CATIP-AS1	6.64445	16.1893	11.5	Promoter (<=1kb)	0	ENSG00000225062	CATIP antisense RNA 1
chr1	122625112	122625389	278	LINC01691	2.69594	16.1171	11.4331	Distal Intergenic	-1044588	NA	long intergenic non-protein coding RNA 1691
chr1	37999695	38000038	344	FHL3	6.81348	16.0907	11.4086	Promoter (<=1kb)	-263	ENSG00000183386	four and a half LIM domains 3
chr21	8245899	8246810	912	MIR6724-2	2.21314	16.0781	11.3981	Promoter (2-3kb)	-2695	ENSG00000274060	microRNA 6724-2
chr15	62390210	62390541	332	TLN2	5.97503	15.9802	11.305	Promoter (<=1kb)	0	ENSG00000171914	talin 2
chr11	47394496	47394853	358	SPI1	6.71475	15.8912	11.2189	Promoter (<=1kb)	754	ENSG00000066336	Spi-1 proto-oncogene
chr16	2868059	2868459	401	LOC101929566	6.71475	15.8912	11.2189	Promoter (<=1kb)	0	ENSG00000263280	uncharacterized LOC101929566
chr5	48364077	48364423	347	EMB	1.75769	15.889	11.2177	Distal Intergenic	2047575	ENSG00000170571	embigin
chr11	20387463	20387764	302	PRMT3	6.29711	15.8797	11.2087	Promoter (<=1kb)	0	ENSG00000185238	protein arginine methyltransferase 3
chr19	43777642	43778141	500	KCNN4	6.29711	15.8797	11.2087	Promoter (<=1kb)	-816	ENSG00000104783	potassium calcium-activated channel subfamily N member 4
chr8	89757307	89757703	397	RIPK2-DT	5.18969	15.8609	11.1909	Promoter (<=1kb)	0	ENSG00000251136	RIPK2 divergent transcript
chr11	18322274	18322567	294	GTF2H1	7.40458	15.847	11.1782	Promoter (<=1kb)	0	ENSG00000110768	general transcription factor IIH subunit 1
chrUn_GL000220v1	153230	154849	1620	RNA5-8SN5	2.69999	15.8361	11.168	Distal Intergenic	41205	ENSG00000274917	RNA, 5.8S ribosomal N5
chr2	229921188	229922248	1061	TRIP12	7.39081	15.822	11.1543	Promoter (<=1kb)	0	ENSG00000153827	thyroid hormone receptor interactor 12
chr6	127343104	127343635	532	ECHDC1	7.39081	15.822	11.1543	Promoter (<=1kb)	0	ENSG00000093144	ethylmalonyl-CoA decarboxylase 1
chr7	32891440	32891758	319	KBTBD2	7.39081	15.822	11.1543	Promoter (<=1kb)	2	ENSG00000170852	kelch repeat and BTB domain containing 2
chrX	120561083	120561393	311	CUL4B	7.39081	15.822	11.1543	Promoter (<=1kb)	-4	ENSG00000158290	cullin 4B
chrY	1391728	1392077	350	SLC25A6	7.39081	15.822	11.1543	Promoter (<=1kb)	11	ENSG00000169100	solute carrier family 25 member 6
chr19	35903581	35904100	520	HCST	6.27011	15.8203	11.1543	Promoter (1-2kb)	1043	ENSG00000126264	hematopoietic cell signal transducer
chr19	16542060	16542471	412	CHERP	5.05116	15.8122	11.1479	Promoter (<=1kb)	0	ENSG00000085872	calcium homeostasis endoplasmic reticulum protein
chr1	123311425	123311722	298	LINC01691	2.8838	15.764	11.1021	Distal Intergenic	-1730901	NA	long intergenic non-protein coding RNA 1691
chr2	32165693	32166082	390	SLC30A6	7.31441	15.6829	11.0236	Promoter (<=1kb)	0	ENSG00000152683	solute carrier family 30 member 6
chr2	99155005	99155279	275	LIPT1	6.19475	15.6539	10.996	Promoter (<=1kb)	0	ENSG00000144182	lipoyltransferase 1
chr2	180006856	180007304	449	CWC22	6.19475	15.6539	10.996	Promoter (<=1kb)	0	ENSG00000163510	CWC22 spliceosome associated protein homolog
chr20	50691149	50691591	443	RIPOR3	6.19475	15.6539	10.996	Promoter (<=1kb)	0	ENSG00000042062	RIPOR family member 3
chr4	77156915	77157547	633	CCNG2	6.19475	15.6539	10.996	Promoter (<=1kb)	0	ENSG00000138764	cyclin G2
chr1	77759487	77759808	322	USP33	6.00485	15.6397	10.9849	Promoter (<=1kb)	0	ENSG00000077254	ubiquitin specific peptidase 33
chr8	143829066	143829737	672	LOC107986985	6.00485	15.6397	10.9849	Promoter (<=1kb)	0	NA	uncharacterized LOC107986985
chr20	62603337	62603885	549	LINC02970	7.03289	15.6172	10.9644	Promoter (<=1kb)	0	NA	long intergenic non-protein coding RNA 2970
chr1	165698151	165698554	404	ALDH9A1	7.53373	15.6134	10.9606	Promoter (<=1kb)	0	ENSG00000143149	aldehyde dehydrogenase 9 family member A1
chr14	30622039	30622380	342	SCFD1	7.53373	15.6134	10.9606	Promoter (<=1kb)	0	ENSG00000092108	sec1 family domain containing 1
chr12	8026248	8026595	348	FOXJ2	7.53373	15.6134	10.9606	Distal Intergenic	-6121	ENSG00000065970	forkhead box J2
chr15	42273176	42273474	299	GANC	7.53373	15.6134	10.9606	Promoter (<=1kb)	0	ENSG00000214013	glucosidase alpha, neutral C
chr16_KI270854v1_alt	130072	130381	310	LINC00235	7.53373	15.6134	10.9606	Promoter (<=1kb)	0	NA	long intergenic non-protein coding RNA 235
chr4	155953623	155953949	327	CTSO	7.53373	15.6134	10.9606	Promoter (<=1kb)	0	ENSG00000256043	cathepsin O
chr6	146543097	146543638	542	RAB32	7.53373	15.6134	10.9606	Promoter (<=1kb)	-195	ENSG00000118508	RAB32, member RAS oncogene family
chr6	2127534	2127823	290	GMDS	7.53373	15.6134	10.9606	Intron (ENST00000530927.5/2762, intron 1 of 10)	48168	ENSG00000112699	GDP-mannose 4,6-dehydratase
chr3	184711775	184712153	379	MAGEF1	5.75554	15.4542	10.8138	Promoter (<=1kb)	0	ENSG00000177383	MAGE family member F1
chr9	62802439	62802832	394	LINC01410	5.75554	15.4542	10.8138	Promoter (<=1kb)	0	ENSG00000238113	long intergenic non-protein coding RNA 1410
chr17	46922997	46923365	369	GOSR2	5.74279	15.4233	10.7843	Promoter (<=1kb)	0	ENSG00000108433	golgi SNAP receptor complex member 2
chr9	128829487	128829796	310	SPOUT1	5.74279	15.4233	10.7843	Promoter (<=1kb)	0	ENSG00000198917	SPOUT domain containing methyltransferase 1
chr21	8223709	8224235	527	RNA5-8SN2	1.97255	15.3983	10.7623	Exon (ENST00000623664.1/107987293, exon 4 of 7)	11137	ENSG00000278233	RNA, 5.8S ribosomal N2
chr5	47330572	47330901	330	HCN1	1.89502	15.3899	10.7545	Distal Intergenic	-1634074	ENSG00000164588	hyperpolarization activated cyclic nucleotide gated potassium channel 1
chr11	65134259	65134760	502	SYVN1	4.90736	15.376	10.7418	Promoter (<=1kb)	0	ENSG00000162298	synoviolin 1
chr17	78378422	78378873	452	PGS1	4.90736	15.376	10.7418	Promoter (<=1kb)	0	ENSG00000087157	phosphatidylglycerophosphate synthase 1
chr19	36378939	36379399	461	ZFP14	5.39817	15.3252	10.6936	Promoter (<=1kb)	0	ENSG00000142065	ZFP14 zinc finger protein
chr4	185395989	185396324	336	ANKRD37	5.39817	15.3252	10.6936	Promoter (<=1kb)	0	ENSG00000186352	ankyrin repeat domain 37
chr20	31675154	31675874	721	BCL2L1-AS1	5.39817	15.3252	10.6936	Intron (ENST00000376062.6/598, intron 1 of 1)	-10342	NA	BCL2L1 antisense RNA 1
chrUn_GL000220v1	138578	138895	318	RNA5-8SN5	2.33339	15.3229	10.6933	Distal Intergenic	26553	ENSG00000274917	RNA, 5.8S ribosomal N5
chr18	47150252	47150690	439	HDHD2	5.12672	15.318	10.6904	Promoter (<=1kb)	0	ENSG00000167220	haloacid dehalogenase like hydrolase domain containing 2
chr4	39527704	39528004	301	UGDH-AS1	5.12672	15.318	10.6904	Promoter (<=1kb)	0	ENSG00000249348	UGDH antisense RNA 1
chr21	8398295	8398820	526	RNA5-8SN3	2.84683	15.2849	10.6614	Promoter (2-3kb)	2688	ENSG00000275215	RNA, 5.8S ribosomal N3
chr20	37289577	37290030	454	MANBAL	6.39836	15.2422	10.6195	Promoter (<=1kb)	0	ENSG00000101363	mannosidase beta like
chr22_KI270733v1_random	122703	123740	1038	RNA5-8SN4	2.54718	15.2416	10.6195	Distal Intergenic	-5137	ENSG00000276700	RNA, 5.8S ribosomal N4
chr20	2102043	2102622	580	STK35	5.35273	15.2051	10.5842	Promoter (<=1kb)	216	ENSG00000125834	serine/threonine kinase 35
chr19	12156370	12156770	401	ZNF625-ZNF20	3.13832	15.167	10.5471	Promoter (<=1kb)	0	NA	ZNF625-ZNF20 readthrough (NMD candidate)
chr5	49387267	49387571	305	EMB	3.13832	15.167	10.5471	Distal Intergenic	1024427	ENSG00000170571	embigin
chrUn_GL000220v1	148909	149519	611	RNA5-8SN5	2.61092	15.1398	10.5212	Exon (ENST00000614535.1/ENST00000614535.1, exon 1 of 1)	36884	ENSG00000274917	RNA, 5.8S ribosomal N5
chr11	46700364	46701035	672	ARHGAP1	7.26169	15.1292	10.5111	Promoter (<=1kb)	0	ENSG00000175220	Rho GTPase activating protein 1
chr10	5684869	5685265	397	TASOR2	6.55143	15.1234	10.5056	Promoter (<=1kb)	0	ENSG00000108021	transcription activation suppressor family member 2
chr8	22244891	22245508	618	MIR320A	6.55143	15.1234	10.5056	Promoter (<=1kb)	0	ENSG00000208037	microRNA 320a
chr12	52069475	52070011	537	ATG101	5.04141	15.0738	10.4609	Promoter (<=1kb)	0	ENSG00000123395	autophagy related 101
chr7	107743810	107744391	582	CBLL1-AS1	6.97465	15.0573	10.4456	Promoter (<=1kb)	0	ENSG00000241764	CBLL1 antisense RNA 1
chr21	8434086	8434790	705	MIR6724-4	2.65828	14.9733	10.3654	Promoter (1-2kb)	1556	ENSG00000275692	microRNA 6724-4
chr15	66504644	66505240	597	ZWILCH	6.69482	14.9696	10.3619	Promoter (<=1kb)	0	ENSG00000174442	zwilch kinetochore protein
chr12	109477321	109477650	330	KCTD10	6.07221	14.9679	10.3602	Promoter (<=1kb)	0	ENSG00000110906	potassium channel tetramerization domain containing 10
chr21	8395446	8396235	790	RNA5-8SN3	2.4673	14.9592	10.3528	Promoter (<=1kb)	0	ENSG00000275215	RNA, 5.8S ribosomal N3
chr19	32345554	32345906	353	ZNF507	5.55161	14.9551	10.3488	Promoter (<=1kb)	0	ENSG00000168813	zinc finger protein 507
chr20	35284557	35284854	298	EIF6	5.55161	14.9551	10.3488	Promoter (<=1kb)	0	ENSG00000242372	eukaryotic translation initiation factor 6
chr15	50908643	50908929	287	AP4E1	6.45649	14.9325	10.3272	Promoter (<=1kb)	0	ENSG00000081014	adaptor related protein complex 4 subunit epsilon 1
chr2	169584294	169584691	398	PPIG	6.45649	14.9325	10.3272	Promoter (<=1kb)	0	ENSG00000138398	peptidylprolyl isomerase G
chr6	109381785	109382201	417	CD164	6.45649	14.9325	10.3272	Promoter (<=1kb)	0	ENSG00000135535	CD164 molecule
chr1	156740657	156741115	459	MRPL24	7.08264	14.807	10.2083	Promoter (<=1kb)	0	ENSG00000143314	mitochondrial ribosomal protein L24
chr3	129626835	129627248	414	PLXND1	7.06947	14.7832	10.1861	Distal Intergenic	-20159	ENSG00000004399	plexin D1
chr4	128155402	128155718	317	LARP1B	5.18662	14.7608	10.1686	Exon (ENST00000511041.1/ENST00000511041.1, exon 1 of 1)	-23596	ENSG00000138709	La ribonucleoprotein 1B
chr12	62260259	62260857	599	MIR6125	5.79779	14.7583	10.1665	Promoter (<=1kb)	0	ENSG00000284360	microRNA 6125
chr10	113854670	113855178	509	NHLRC2	5.97351	14.7511	10.1605	Promoter (<=1kb)	0	ENSG00000196865	NHL repeat containing 2
chr2	65227847	65228375	529	ACTR2	5.97351	14.7511	10.1605	Promoter (<=1kb)	10	ENSG00000138071	actin related protein 2
chr16	88978713	88979475	763	CBFA2T3	6.33126	14.6786	10.0944	Promoter (1-2kb)	-1506	ENSG00000129993	CBFA2/RUNX1 partner transcriptional co-repressor 3
chr14	24195361	24195744	384	TM9SF1	6.11044	14.6374	10.0547	Promoter (<=1kb)	0	ENSG00000100926	transmembrane 9 superfamily member 1
chrUn_GL000220v1	114638	115296	659	RNA5-8SN5	3.08857	14.6363	10.0545	Promoter (2-3kb)	2613	ENSG00000274917	RNA, 5.8S ribosomal N5
chr10	43397088	43397573	486	HNRNPF	4.77105	14.619	10.0387	Promoter (<=1kb)	0	ENSG00000169813	heterogeneous nuclear ribonucleoprotein F
chr8	144477983	144478287	305	PPP1R16A	4.77105	14.619	10.0387	Promoter (<=1kb)	0	ENSG00000160972	protein phosphatase 1 regulatory subunit 16A
chr21	8408453	8409716	1264	RNA5-8SN3	2.12278	14.6182	10.0387	Exon (ENST00000623860.3/105379508, exon 6 of 7)	12846	ENSG00000275215	RNA, 5.8S ribosomal N3
chr5	48617263	48617544	282	EMB	4.77105	14.619	10.0387	Distal Intergenic	1794454	ENSG00000170571	embigin
chr1	26500954	26501361	408	HMGN2	5.55136	14.5696	9.99212	Distal Intergenic	27525	ENSG00000198830	high mobility group nucleosomal binding domain 2
chr2	219245243	219245791	549	GLB1L	5.55136	14.5696	9.99212	Promoter (<=1kb)	0	ENSG00000163521	galactosidase beta 1 like
chr4	10116769	10117337	569	WDR1	5.55136	14.5696	9.99212	Promoter (<=1kb)	0	ENSG00000071127	WD repeat domain 1
chr17	80454464	80454769	306	NPTX1	5.55136	14.5696	9.99212	Exon (ENST00000562672.2/ENST00000562672.2, exon 1 of 1)	19167	ENSG00000171246	neuronal pentraxin 1
chr5	48308895	48309496	602	EMB	3.31554	14.5688	9.99212	Distal Intergenic	2102502	ENSG00000170571	embigin
chr1	247078232	247078803	572	ZNF670-ZNF695	7.19129	14.5525	9.97809	Promoter (<=1kb)	0	ENSG00000135747	ZNF670-ZNF695 readthrough (NMD candidate)
chr12	50764502	50765061	560	ATF1	7.19129	14.5525	9.97809	Promoter (<=1kb)	0	ENSG00000123268	activating transcription factor 1
chr13	28658899	28659446	548	POMP	7.19129	14.5525	9.97809	Promoter (<=1kb)	0	ENSG00000132963	proteasome maturation protein
chr16	53434501	53434871	371	RBL2	7.19129	14.5525	9.97809	Promoter (<=1kb)	30	ENSG00000103479	RB transcriptional corepressor like 2
chr5	177497222	177497627	406	PDLIM7	7.19129	14.5525	9.97809	Promoter (<=1kb)	0	ENSG00000196923	PDZ and LIM domain 7
chr7	144835979	144836276	298	TPK1	7.19129	14.5525	9.97809	Promoter (<=1kb)	0	ENSG00000196511	thiamin pyrophosphokinase 1
chr8_KI270821v1_alt	361785	362176	392	MYOM2	7.19129	14.5525	9.97809	Distal Intergenic	35302	ENSG00000036448	myomesin 2
chr1	1308094	1308413	320	ACAP3	4.97593	14.5347	9.9674	Promoter (<=1kb)	-164	ENSG00000131584	ArfGAP with coiled-coil, ankyrin repeat and PH domains 3
chr11	118252167	118252511	345	MPZL3	5.22948	14.5104	9.94482	Promoter (<=1kb)	0	ENSG00000160588	myelin protein zero like 3
chr8	94719684	94720051	368	DPY19L4	5.22948	14.5104	9.94482	Promoter (<=1kb)	0	ENSG00000156162	dpy-19 like 4
chr8_KI270816v1_alt	87300	87736	437	EEF1D	5.22948	14.5104	9.94482	Promoter (<=1kb)	0	ENSG00000104529	eukaryotic translation elongation factor 1 delta
chr1	2391689	2392011	323	RER1	6.91221	14.4974	9.93331	Promoter (<=1kb)	0	ENSG00000157916	retention in endoplasmic reticulum sorting receptor 1
chr19	58554812	58555184	373	CHMP2A	5.82153	14.4137	9.85312	Promoter (<=1kb)	0	ENSG00000130724	charged multivesicular body protein 2A
chr2	203327915	203328433	519	ABI2	5.82153	14.4137	9.85312	Promoter (<=1kb)	0	ENSG00000138443	abl interactor 2
chr3	39406725	39407033	309	RPSA	7.11139	14.4115	9.8519	Promoter (<=1kb)	0	ENSG00000168028	ribosomal protein SA
chr16	3283455	3283747	293	ZNF263	6.59191	14.3371	9.7801	Promoter (<=1kb)	0	ENSG00000006194	zinc finger protein 263
chr19	58538528	58538942	415	ZBTB45	5.0305	14.3356	9.78005	Promoter (<=1kb)	0	ENSG00000119574	zinc finger and BTB domain containing 45
chr1	29085	29364	280	MIR1302-2HG	6.15227	14.3114	9.75639	Promoter (<=1kb)	-190	NA	MIR1302-2 host gene
chr1	123535611	123535882	272	LINC01691	3.0988	14.3044	9.75078	Distal Intergenic	-1955087	NA	long intergenic non-protein coding RNA 1691
chr19	11887828	11888248	421	ZNF69	4.04543	14.2795	9.72748	Promoter (<=1kb)	0	ENSG00000198429	zinc finger protein 69
chr22_KI270733v1_random	125991	126791	801	RNA5-8SN4	2.64986	14.2755	9.72379	Promoter (2-3kb)	-2086	ENSG00000276700	RNA, 5.8S ribosomal N4
chr21	8432840	8433294	455	MIR6724-4	2.34392	14.2282	9.67833	Promoter (<=1kb)	310	ENSG00000275692	microRNA 6724-4
chr19	10106325	10106651	327	PPAN	4.34589	14.2057	9.65661	Promoter (<=1kb)	0	ENSG00000130810	peter pan homolog
chr16	88455774	88456125	352	ZFPM1	5.89811	14.1819	9.63396	Promoter (2-3kb)	2147	ENSG00000179588	zinc finger protein, FOG family member 1
chr10	118341975	118342339	365	FAM204A	6.28937	14.173	9.62522	Promoter (<=1kb)	0	ENSG00000165669	family with sequence similarity 204 member A
chr17	42387815	42388504	690	STAT3	6.28937	14.173	9.62522	Promoter (<=1kb)	0	ENSG00000168610	signal transducer and activator of transcription 3
chr9	89318231	89318762	532	SECISBP2	6.28937	14.173	9.62522	Promoter (<=1kb)	0	ENSG00000187742	SECIS binding protein 2
chr10	40065990	40066308	319	ACTR3BP5	2.93554	14.1649	9.61973	Distal Intergenic	1369566	NA	ACTR3B pseudogene 5
chr21	8450145	8450516	372	RNA5-8SN1	2.41695	14.1514	9.60655	Exon (ENST00000651813.1/107987294, exon 3 of 7)	10322	ENSG00000278189	RNA, 5.8S ribosomal N1
chr20	62182998	62183269	272	MTG2	5.36655	14.1194	9.57567	Promoter (<=1kb)	0	ENSG00000101181	mitochondrial ribosome associated GTPase 2
chr19	25088652	25088985	334	HAVCR1P1	2.80815	14.1128	9.56993	Distal Intergenic	-925168	ENSG00000268442	hepatitis A virus cellular receptor 1 pseudogene 1
chr19	26986799	26987070	272	LOC105372345	2.80815	14.1128	9.56993	Distal Intergenic	698185	NA	uncharacterized LOC105372345
chr8	143942382	143942679	298	PLEC	5.51361	14.0964	9.55377	Promoter (<=1kb)	0	ENSG00000178209	plectin
chr19	26474617	26474915	299	LOC105372345	2.19334	14.0785	9.53646	Distal Intergenic	1210340	NA	uncharacterized LOC105372345
chr15	92809172	92809652	481	FAM174B	5.84732	14.0716	9.52978	Promoter (<=1kb)	146	ENSG00000185442	family with sequence similarity 174 member B
chr22	19941435	19941800	366	COMT	5.84732	14.0716	9.52978	Promoter (<=1kb)	0	ENSG00000093010	catechol-O-methyltransferase
chr8	37899216	37899560	345	RAB11FIP1	5.84732	14.0716	9.52978	Promoter (<=1kb)	0	ENSG00000156675	RAB11 family interacting protein 1
chr10	119650907	119651201	295	BAG3	6.67141	14.0549	9.51442	Promoter (<=1kb)	-179	ENSG00000151929	BAG cochaperone 3
chr14	72892748	72893320	573	DPF3	6.67141	14.0549	9.51442	Promoter (<=1kb)	-99	ENSG00000205683	double PHD fingers 3
chr19	49511388	49511737	350	FCGRT	5.65802	14.0453	9.50612	Promoter (<=1kb)	-638	ENSG00000104870	Fc gamma receptor and transporter
chr19	38849610	38849892	283	HNRNPL	5.18423	14.0288	9.48992	Promoter (<=1kb)	48	ENSG00000104824	heterogeneous nuclear ribonucleoprotein L
chr19	45509024	45509449	426	VASP	4.29363	14.0252	9.48668	Promoter (1-2kb)	1514	ENSG00000125753	vasodilator stimulated phosphoprotein
chr16	3305487	3305933	447	ZNF75A	4.47766	14.0245	9.48601	Promoter (<=1kb)	0	ENSG00000162086	zinc finger protein 75a
chr19	50376485	50376776	292	NR1H2	4.47766	14.0245	9.48601	Promoter (<=1kb)	12	ENSG00000131408	nuclear receptor subfamily 1 group H member 2
chr1	37553926	37554630	705	SNIP1	6.88808	14.0146	9.47694	Promoter (<=1kb)	0	ENSG00000163877	Smad nuclear interacting protein 1
chr3	9649430	9649824	395	MTMR14	6.19824	13.9906	9.45372	Promoter (<=1kb)	0	ENSG00000163719	myotubularin related protein 14
chr3	50611549	50612110	562	CISH	6.19824	13.9906	9.45372	Promoter (<=1kb)	0	ENSG00000114737	cytokine inducible SH2 containing protein
chr8	37736380	37736851	472	ERLIN2	6.19824	13.9906	9.45372	Promoter (<=1kb)	0	ENSG00000147475	ER lipid raft associated 2
chrUn_GL000220v1	139176	139548	373	RNA5-8SN5	2.24921	13.9201	9.3881	Distal Intergenic	27151	ENSG00000274917	RNA, 5.8S ribosomal N5
chr4	139084056	139084654	599	ELF2	4.75805	13.9094	9.37758	Promoter (<=1kb)	0	ENSG00000109381	E74 like ETS transcription factor 2
chr21	8250539	8250926	388	MIR6724-2	2.73591	13.8813	9.35101	Promoter (1-2kb)	1034	ENSG00000274060	microRNA 6724-2
chr15	50354492	50355348	857	GABPB1-AS1	4.63473	13.8741	9.34404	Promoter (<=1kb)	0	NA	GABPB1 antisense RNA 1
chr5	172187618	172188125	508	STK10	4.63473	13.8741	9.34404	Promoter (<=1kb)	99	ENSG00000072786	serine/threonine kinase 10
chr10	32055787	32056408	622	KIF5B	5.75227	13.864	9.33622	Promoter (<=1kb)	17	ENSG00000170759	kinesin family member 5B
chr11	64206797	64208001	1205	FERMT3	5.75227	13.864	9.33622	Promoter (<=1kb)	0	ENSG00000149781	FERM domain containing kindlin 3
chr11	68213649	68213949	301	KMT5B	5.75227	13.864	9.33622	Promoter (<=1kb)	0	ENSG00000110066	lysine methyltransferase 5B
chr14	34873944	34874423	480	BAZ1A-AS1	5.75227	13.864	9.33622	Promoter (<=1kb)	0	ENSG00000258738	BAZ1A antisense RNA 1
chr17	47895969	47896741	773	SP2	5.75227	13.864	9.33622	Promoter (<=1kb)	0	ENSG00000167182	Sp2 transcription factor
chr19	12734183	12734678	496	TRIR	5.75227	13.864	9.33622	Promoter (<=1kb)	0	ENSG00000123144	telomerase RNA component interacting RNase
chr21	8988237	8988656	420	MIR3648-2	5.75227	13.864	9.33622	Promoter (1-2kb)	1238	ENSG00000264462	microRNA 3648-2
chr6	42978828	42979200	373	PEX6	5.75227	13.864	9.33622	Promoter (<=1kb)	0	ENSG00000124587	peroxisomal biogenesis factor 6
chr6	108261098	108261739	642	SNX3	6.80264	13.8615	9.33622	Promoter (<=1kb)	0	ENSG00000112335	sorting nexin 3
chr3	128603951	128604363	413	RPN1	5.75227	13.864	9.33622	Distal Intergenic	22903	ENSG00000163902	ribophorin I
chr19	12092374	12092671	298	ZNF788P	3.80627	13.8544	9.33214	Promoter (<=1kb)	0	NA	zinc finger family member 788, pseudogene
chr9	214474	214763	290	DOCK8	3.68345	13.8373	9.31563	Promoter (<=1kb)	-91	ENSG00000107099	dedicator of cytokinesis 8
chrX	115736961	115737250	290	PLS3	3.18511	13.8138	9.29283	Intron (ENST00000664453.1/642776, intron 1 of 3)	96657	ENSG00000102024	plastin 3
chr20	408073	408441	369	RBCK1	4.82514	13.7643	9.24497	Promoter (<=1kb)	0	ENSG00000125826	RANBP2-type and C3HC4-type zinc finger containing 1
chr1	93878872	93879249	378	DNTTIP2	6.74813	13.7635	9.24497	Promoter (<=1kb)	0	ENSG00000067334	deoxynucleotidyltransferase terminal interacting protein 2
chr11	32892409	32892747	339	QSER1	6.74813	13.7635	9.24497	Promoter (<=1kb)	-64	ENSG00000060749	glutamine and serine rich 1
chr2	180980069	180980366	298	UBE2E3-DT	6.74813	13.7635	9.24497	Promoter (<=1kb)	0	NA	UBE2E3 divergent transcript
chr22	31290842	31291316	475	PIK3IP1	6.74813	13.7635	9.24497	Promoter (<=1kb)	-88	ENSG00000100100	phosphoinositide-3-kinase interacting protein 1
chr5	134371177	134371463	287	UBE2B	6.74813	13.7635	9.24497	Promoter (<=1kb)	0	ENSG00000119048	ubiquitin conjugating enzyme E2 B
chr21	8428887	8429793	907	MIR6724-4	2.10418	13.7587	9.24497	Promoter (2-3kb)	-2737	ENSG00000275692	microRNA 6724-4
chr19	2950297	2950661	365	ZNF77	6.74813	13.7635	9.24497	Exon (ENST00000624348.1/ENST00000624348.1, exon 1 of 1)	-5326	ENSG00000175691	zinc finger protein 77
chr1	151281478	151281842	365	ZNF687	6.28166	13.7398	9.22712	Promoter (<=1kb)	0	ENSG00000143373	zinc finger protein 687
chr12	48957243	48957514	272	ARF3	5.87542	13.7327	9.22049	Promoter (<=1kb)	0	ENSG00000134287	ADP ribosylation factor 3
chr12	55716019	55716359	341	BLOC1S1-RDH5	5.35994	13.7305	9.2193	Promoter (<=1kb)	0	NA	BLOC1S1-RDH5 readthrough
chr4	153466659	153467120	462	TMEM131L	5.35994	13.7305	9.2193	Promoter (<=1kb)	299	ENSG00000121210	transmembrane 131 like
chr16	1308740	1309367	628	UBE2I	5.06078	13.7092	9.20167	Promoter (<=1kb)	0	ENSG00000103275	ubiquitin conjugating enzyme E2 I
chr17	50150858	50152340	1483	PPP1R9B	5.06078	13.7092	9.20167	Promoter (<=1kb)	-181	ENSG00000108819	protein phosphatase 1 regulatory subunit 9B
chr19	12681576	12681865	290	DHPS	5.06078	13.7092	9.20167	Promoter (<=1kb)	0	ENSG00000095059	deoxyhypusine synthase
chr10	35090331	35090615	285	CUL2	6.24898	13.6762	9.17182	Promoter (<=1kb)	0	ENSG00000108094	cullin 2
chr8	33515304	33515581	278	SNORD13	6.24898	13.6762	9.17182	Promoter (1-2kb)	1829	ENSG00000239039	small nucleolar RNA, C/D box 13
chr3	128596850	128597408	559	LINC01565	6.24898	13.6762	9.17182	Distal Intergenic	-20764	ENSG00000198685	long intergenic non-protein coding RNA 1565
chr1	93345490	93345918	429	CCDC18-AS1	5.18291	13.6634	9.16027	Promoter (<=1kb)	0	NA	CCDC18 antisense RNA 1
chr20	62776992	62777354	363	LINC00659	6.67837	13.6376	9.13545	Promoter (<=1kb)	0	ENSG00000228705	long intergenic non-protein coding RNA 659
chr21	8443587	8443990	404	RNA5-8SN1	2.43879	13.5863	9.08591	Intron (ENST00000651813.1/107987294, intron 2 of 6)	3764	ENSG00000278189	RNA, 5.8S ribosomal N1
chr8	144786957	144787401	445	ZNF34	4.43433	13.5719	9.07221	Promoter (<=1kb)	0	ENSG00000196378	zinc finger protein 34
chr21	8235330	8236050	721	MIR6724-2	2.10327	13.5524	9.05367	Exon (ENST00000651830.1/ENST00000651830.1, exon 1 of 1)	-13455	ENSG00000274060	microRNA 6724-2
chr1	21334509	21334825	317	ECE1	6.18464	13.5503	9.05169	Intron (ENST00000415912.6/1889, intron 1 of 18)	10312	ENSG00000117298	endothelin converting enzyme 1
chr2	98608318	98608873	556	UNC50	5.60592	13.5408	9.04261	Promoter (<=1kb)	0	ENSG00000115446	unc-50 inner nuclear membrane RNA binding protein
chr19	33260574	33261037	464	SLC7A10	5.60592	13.5408	9.04261	Distal Intergenic	-34724	ENSG00000130876	solute carrier family 7 member 10
chr19	11987677	11988100	424	ZNF433-AS1	3.51087	13.532	9.0353	Promoter (<=1kb)	0	ENSG00000219665	ZNF433 and ZNF878 antisense RNA 1
chr19	55654991	55655504	514	U2AF2	4.23152	13.5121	9.0163	Promoter (<=1kb)	0	ENSG00000063244	U2 small nuclear RNA auxiliary factor 2
chr3	190513664	190513950	287	IL1RAP	6.84885	13.5117	9.0163	Promoter (<=1kb)	-101	ENSG00000196083	interleukin 1 receptor accessory protein
chr5	95646794	95647273	480	RFESD	6.84885	13.5117	9.0163	Promoter (<=1kb)	0	ENSG00000175449	Rieske Fe-S domain containing
chr5	150700608	150701010	403	RBM22	6.84885	13.5117	9.0163	Promoter (<=1kb)	0	ENSG00000086589	RNA binding motif protein 22
chr16_KI270855v1_alt	7760	8131	372	GLIS2	6.84885	13.5117	9.0163	Distal Intergenic	-6994	ENSG00000126603	GLIS family zinc finger 2
chr21	37220826	37221547	722	VPS26C	6.84885	13.5117	9.0163	Exon (ENST00000454482.2/257203, exon 3 of 3)	7936	ENSG00000157538	VPS26 endosomal protein sorting factor C
chrUn_GL000220v1	131158	131572	415	RNA5-8SN5	2.40137	13.4687	8.98105	Distal Intergenic	19133	ENSG00000274917	RNA, 5.8S ribosomal N5
chr21	8419874	8420706	833	MIR6724-4	1.75628	13.4531	8.96584	Exon (ENST00000652246.1/ENST00000652246.1, exon 1 of 1)	-11824	ENSG00000275692	microRNA 6724-4
chr12	56007455	56007749	295	IKZF4	5.37752	13.3996	8.91391	Promoter (<=1kb)	0	ENSG00000123411	IKAROS family zinc finger 4
chr1	110963575	110963885	311	LRIF1	5.90618	13.3974	8.91239	Promoter (<=1kb)	37	ENSG00000121931	ligand dependent nuclear receptor interacting factor 1
chr11	47578787	47579074	288	NDUFS3	5.90618	13.3974	8.91239	Promoter (<=1kb)	0	ENSG00000213619	NADH:ubiquinone oxidoreductase core subunit S3
chr10	16437001	16437325	325	PTER	6.3053	13.3693	8.88578	Promoter (<=1kb)	0	ENSG00000165983	phosphotriesterase related
chr12	69585428	69585786	359	CCT2	6.3053	13.3693	8.88578	Promoter (<=1kb)	0	ENSG00000166226	chaperonin containing TCP1 subunit 2
chr8	42271094	42271564	471	IKBKB-DT	6.51958	13.3492	8.86746	Promoter (<=1kb)	0	NA	IKBKB divergent transcript
chr19	18318007	18318884	878	LSM4	3.94016	13.317	8.83673	Promoter (1-2kb)	-1748	ENSG00000130520	LSM4 homolog, U6 small nuclear RNA and mRNA degradation associated
chr1	19597046	19597400	355	MICOS10-NBL1	4.35328	13.313	8.83305	Promoter (<=1kb)	0	ENSG00000158747	MICOS10-NBL1 readthrough
chr1	123811307	123811612	306	LINC01691	3.71977	13.2317	8.75933	Distal Intergenic	-2230783	NA	long intergenic non-protein coding RNA 1691
chr19	26749716	26750001	286	LOC105372345	2.18778	13.157	8.68858	Distal Intergenic	935254	NA	uncharacterized LOC105372345
chr8	143928235	143929113	879	PLEC	5.59831	13.1394	8.67252	Exon (ENST00000345136.8/5339, exon 25 of 32)	10484	ENSG00000178209	plectin
chr4	49510311	49510597	287	CWH43	2.69515	13.0748	8.61028	Distal Intergenic	481619	ENSG00000109182	cell wall biogenesis 43 C-terminal homolog
chr12	49018781	49019061	281	PRKAG1	5.93998	13.0663	8.60339	Promoter (<=1kb)	0	ENSG00000181929	protein kinase AMP-activated non-catalytic subunit gamma 1
chr16	74296746	74297023	278	PSMD7-DT	5.93998	13.0663	8.60339	Promoter (<=1kb)	0	ENSG00000261404	PSMD7 divergent transcript
chr19	35641615	35642255	641	ETV2	5.93998	13.0663	8.60339	Promoter (<=1kb)	0	ENSG00000105672	ETS variant transcription factor 2
chr2	112055396	112056201	806	TMEM87B	5.93998	13.0663	8.60339	Promoter (<=1kb)	0	ENSG00000153214	transmembrane protein 87B
chr12	48105813	48106110	298	SENP1	4.02206	13.0657	8.60339	Promoter (<=1kb)	0	ENSG00000079387	SUMO specific peptidase 1
chr19	35953001	35953378	378	LOC105372383	5.93998	13.0663	8.60339	Intron (ENST00000592518.1/105372383, intron 1 of 3)	5886	NA	uncharacterized LOC105372383
chrUn_GL000220v1	158617	159248	632	RNA5-8SN5	2.57839	13.0513	8.59084	Distal Intergenic	46592	ENSG00000274917	RNA, 5.8S ribosomal N5
chr9	4984681	4985079	399	JAK2	3.35744	13.0167	8.55814	Promoter (<=1kb)	0	ENSG00000096968	Janus kinase 2
chr19	58519602	58519890	289	ZBTB45	4.67436	13.0071	8.5487	Promoter (<=1kb)	0	ENSG00000119574	zinc finger and BTB domain containing 45
chr11	124759244	124759783	540	ESAM-AS1	5.53103	12.9931	8.53637	Promoter (<=1kb)	115	ENSG00000250073	ESAM antisense RNA 1
chr12	51238836	51239198	363	NA	5.53103	12.9931	8.53637	Promoter (<=1kb)	0	NA	NA
chr19	6737293	6737607	315	GPR108	5.53103	12.9931	8.53637	Promoter (<=1kb)	0	ENSG00000125734	G protein-coupled receptor 108
chr19	49766894	49767321	428	AP2A1	5.53103	12.9931	8.53637	Promoter (<=1kb)	0	ENSG00000196961	adaptor related protein complex 2 subunit alpha 1
chr20	16729549	16730409	861	SNRPB2	5.53103	12.9931	8.53637	Promoter (<=1kb)	0	ENSG00000125870	small nuclear ribonucleoprotein polypeptide B2
chr22	37484383	37484959	577	MFNG	5.53103	12.9931	8.53637	Promoter (<=1kb)	0	ENSG00000100060	MFNG O-fucosylpeptide 3-beta-N-acetylglucosaminyltransferase
chr5	181223255	181223976	722	TRIM41	5.53103	12.9931	8.53637	Promoter (<=1kb)	0	ENSG00000146063	tripartite motif containing 41
chr6	153002365	153002741	377	MTRF1L	5.53103	12.9931	8.53637	Promoter (<=1kb)	0	ENSG00000112031	mitochondrial translation release factor 1 like
chr4	173169884	173170211	328	GALNT7-DT	4.15759	12.9669	8.51577	Promoter (<=1kb)	-232	ENSG00000245213	GALNT7 divergent transcript
chr19	4247037	4247315	279	YJU2	6.07205	12.9236	8.47475	Promoter (<=1kb)	0	ENSG00000105248	YJU2 splicing factor homolog
chr12_GL877875v1_alt	20843	21612	770	WASH8P	4.89209	12.922	8.4739	Promoter (<=1kb)	403	ENSG00000226210	WAS protein family homolog 8, pseudogene
chr19	36573071	36573488	418	ZNF529-AS1	4.89209	12.922	8.4739	Promoter (<=1kb)	0	ENSG00000233527	ZNF529 antisense RNA 1
chr21	44011950	44012265	316	TRAPPC10	4.89209	12.922	8.4739	Promoter (<=1kb)	-44	ENSG00000160218	trafficking protein particle complex subunit 10
chr14	102591514	102592392	879	RCOR1	5.16851	12.9065	8.46147	Promoter (<=1kb)	-257	ENSG00000089902	REST corepressor 1
chr15	65517383	65517668	286	DPP8	5.16851	12.9065	8.46147	Promoter (<=1kb)	0	ENSG00000074603	dipeptidyl peptidase 8
chr5	32585523	32585961	439	SUB1	5.16851	12.9065	8.46147	Promoter (<=1kb)	0	ENSG00000113387	SUB1 regulator of transcription
chr5	150449539	150449998	460	RPS14	5.16851	12.9065	8.46147	Promoter (<=1kb)	0	ENSG00000164587	ribosomal protein S14
chr6	42452353	42452964	612	TRERF1	6.25913	12.8701	8.42874	Promoter (<=1kb)	-302	ENSG00000124496	transcriptional regulating factor 1
chr15	101294893	101295233	341	SNRPA1	5.64041	12.8449	8.40506	Promoter (<=1kb)	0	ENSG00000131876	small nuclear ribonucleoprotein polypeptide A'
chr5	139341857	139342178	322	PAIP2	5.64041	12.8449	8.40506	Promoter (<=1kb)	0	ENSG00000120727	poly(A) binding protein interacting protein 2
chr14	49633736	49634339	604	DNAAF2	4.11716	12.8299	8.39158	Promoter (<=1kb)	891	ENSG00000165506	dynein axonemal assembly factor 2
chr13	74135106	74136181	1076	KLF12	4.71609	12.7923	8.35628	Promoter (1-2kb)	-1177	ENSG00000118922	KLF transcription factor 12
chr4_GL383527v1_alt	118226	118541	316	CTSO	6.43877	12.7852	8.3502	Promoter (<=1kb)	0	ENSG00000256043	cathepsin O
chr10	14959410	14959743	334	MEIG1	6.42679	12.7638	8.32977	Promoter (<=1kb)	0	ENSG00000197889	meiosis/spermiogenesis associated 1
chr11	17353473	17353764	292	NCR3LG1	6.42679	12.7638	8.32977	Promoter (1-2kb)	1574	ENSG00000188211	natural killer cell cytotoxicity receptor 3 ligand 1
chr15	43105807	43106196	390	UBR1	6.42679	12.7638	8.32977	Promoter (<=1kb)	0	ENSG00000159459	ubiquitin protein ligase E3 component n-recognin 1
chr16	4182586	4183932	1347	LOC105371062	6.42679	12.7638	8.32977	Promoter (<=1kb)	0	NA	uncharacterized LOC105371062
chr17	55751053	55751496	444	PCTP	6.42679	12.7638	8.32977	Promoter (<=1kb)	0	ENSG00000141179	phosphatidylcholine transfer protein
chr2	222296804	222297208	405	CCDC140	6.42679	12.7638	8.32977	Promoter (<=1kb)	-939	ENSG00000163081	CCDC140 long non-coding RNA
chr20	38805045	38805629	585	PPP1R16B	6.42679	12.7638	8.32977	Promoter (<=1kb)	-68	ENSG00000101445	protein phosphatase 1 regulatory subunit 16B
chr9	95875698	95875993	296	ERCC6L2-AS1	6.42679	12.7638	8.32977	Promoter (<=1kb)	0	ENSG00000175611	ERCC6L2 antisense RNA 1
chr3	23917123	23917512	390	RPL15	5.97729	12.7403	8.31076	Promoter (<=1kb)	0	ENSG00000174748	ribosomal protein L15
chr16	88570158	88570445	288	ZC3H18	6.1885	12.7388	8.31049	Promoter (<=1kb)	0	ENSG00000158545	zinc finger CCCH-type containing 18
chr19	17406445	17406759	315	MVB12A	5.56528	12.6863	8.25985	Promoter (<=1kb)	300	ENSG00000141971	multivesicular body subunit 12A
chr1	124069149	124069474	326	LINC01691	2.10117	12.6542	8.22918	Distal Intergenic	-2488625	NA	long intergenic non-protein coding RNA 1691
chr21	8441210	8441681	472	RNA5-8SN1	2.65719	12.6242	8.19995	Promoter (1-2kb)	1387	ENSG00000278189	RNA, 5.8S ribosomal N1
chr16	28984769	28985226	458	LAT	4.2289	12.6135	8.18999	Promoter (<=1kb)	0	ENSG00000213658	linker for activation of T cells
chr16	30096355	30096690	336	YPEL3-DT	6.32186	12.5752	8.15361	Promoter (<=1kb)	0	ENSG00000250616	YPEL3 divergent transcript
chr3	197791273	197791626	354	LRCH3	5.17836	12.5699	8.1485	Promoter (<=1kb)	0	ENSG00000186001	leucine rich repeats and calponin homology domain containing 3
chr20	34363315	34363712	398	ITCH	5.66009	12.5009	8.0821	Promoter (<=1kb)	0	ENSG00000078747	itchy E3 ubiquitin protein ligase
chr19	45515099	45515540	442	VASP	4.99645	12.4923	8.07521	Intron (ENST00000589627.1/7408, intron 2 of 2)	-7016	ENSG00000125753	vasodilator stimulated phosphoprotein
chr15	94844785	94845381	597	LOC105370991	6.5064	12.4918	8.0752	Intron (ENST00000618611.4/105370991, intron 1 of 3)	3699	NA	uncharacterized LOC105370991
chr1	154559018	154559299	282	UBE2Q1	6.5064	12.4918	8.0752	Promoter (<=1kb)	0	ENSG00000160714	ubiquitin conjugating enzyme E2 Q1
chr1	222713290	222713570	281	BROX	6.5064	12.4918	8.0752	Promoter (<=1kb)	0	ENSG00000162819	BRO1 domain and CAAX motif containing
chr11	117327805	117328107	303	CEP164	6.5064	12.4918	8.0752	Promoter (<=1kb)	0	ENSG00000110274	centrosomal protein 164
chr14	51989385	51989878	494	RTRAF	6.5064	12.4918	8.0752	Promoter (<=1kb)	0	ENSG00000087302	RNA transcription, translation and transport factor
chr17	3916359	3916796	438	P2RX1	6.5064	12.4918	8.0752	Promoter (<=1kb)	0	ENSG00000108405	purinergic receptor P2X 1
chr2	9843461	9843741	281	TAF1B	6.5064	12.4918	8.0752	Promoter (<=1kb)	0	ENSG00000115750	TATA-box binding protein associated factor, RNA polymerase I subunit B
chr16	27367249	27368100	852	IL4R	6.5064	12.4918	8.0752	Distal Intergenic	11901	ENSG00000077238	interleukin 4 receptor
chr5	173056344	173056712	369	CREBRF	6.5064	12.4918	8.0752	Promoter (<=1kb)	0	ENSG00000164463	CREB3 regulatory factor
chr6	37820132	37820425	294	ZFAND3	6.5064	12.4918	8.0752	Promoter (<=1kb)	190	ENSG00000156639	zinc finger AN1-type containing 3
chr7	104983705	104984119	415	LINC01004	6.5064	12.4918	8.0752	Promoter (<=1kb)	0	NA	long intergenic non-protein coding RNA 1004
chr9	19049307	19049629	323	RRAGA	6.5064	12.4918	8.0752	Promoter (<=1kb)	0	ENSG00000155876	Ras related GTP binding A
chr1	109532539	109532873	335	GPR61	6.24625	12.4385	8.0309	Distal Intergenic	-6999	ENSG00000156097	G protein-coupled receptor 61
chr19	41353764	41354077	314	TGFB1	4.3621	12.422	8.01519	Promoter (<=1kb)	0	ENSG00000105329	transforming growth factor beta 1
chr4	2934829	2935276	448	MFSD10	4.3621	12.422	8.01519	Promoter (<=1kb)	0	ENSG00000109736	major facilitator superfamily domain containing 10
chr1	23959226	23959542	317	PNRC2	6.0187	12.4205	8.01469	Promoter (<=1kb)	117	ENSG00000189266	proline rich nuclear receptor coactivator 2
chr4	102827255	102827829	575	UBE2D3-AS1	6.0187	12.4205	8.01469	Promoter (<=1kb)	0	NA	UBE2D3 antisense RNA 1
chrUn_GL000220v1	159760	160080	321	RNA5-8SN5	2.3575	12.3941	7.99195	Distal Intergenic	47735	ENSG00000274917	RNA, 5.8S ribosomal N5
chr2	231464719	231465034	316	NCL	5.98585	12.3585	7.95768	Promoter (<=1kb)	-168	ENSG00000115053	nucleolin
chr4	8440479	8440750	272	ACOX3	5.98585	12.3585	7.95768	Promoter (<=1kb)	0	ENSG00000087008	acyl-CoA oxidase 3, pristanoyl
chr19	35803851	35804285	435	PRODH2	5.58119	12.3391	7.9391	Promoter (1-2kb)	-1381	ENSG00000250799	proline dehydrogenase 2
chr9	5437635	5438200	566	PLGRKT	3.68464	12.3258	7.92694	Promoter (<=1kb)	0	ENSG00000107020	plasminogen receptor with a C-terminal lysine
chr1	150010387	150010809	423	OTUD7B	5.76526	12.3256	7.92694	Promoter (<=1kb)	0	ENSG00000264522	OTU deubiquitinase 7B
chr1	204411184	204411841	658	PPP1R15B	5.76526	12.3256	7.92694	Promoter (<=1kb)	0	ENSG00000158615	protein phosphatase 1 regulatory subunit 15B
chr2	218406502	218406913	412	MIR26B	5.76526	12.3256	7.92694	Distal Intergenic	3856	ENSG00000199121	microRNA 26b
chrUn_GL000220v1	124103	124582	480	RNA5-8SN5	2.05865	12.2767	7.88366	Distal Intergenic	12078	ENSG00000274917	RNA, 5.8S ribosomal N5
chr13	60163706	60163985	280	DIAPH3	4.52357	12.2634	7.87107	Promoter (<=1kb)	0	ENSG00000139734	diaphanous related formin 3
chr19	56567365	56567790	426	ZNF470-DT	4.52357	12.2634	7.87107	Promoter (<=1kb)	0	NA	ZNF470 divergent transcript
chr21	8203853	8204513	661	MIR6724-1	2.60721	12.239	7.84926	Promoter (<=1kb)	-802	ENSG00000275950	microRNA 6724-1
chr11	62612256	62612988	733	EML3	6.35175	12.221	7.83162	Promoter (<=1kb)	0	ENSG00000149499	EMAP like 3
chr14	49893081	49893481	401	ARF6	5.1766	12.2067	7.81803	Promoter (<=1kb)	0	ENSG00000165527	ADP ribosylation factor 6
chr22_KI270733v1_random	135712	136210	499	RNA5-8SN4	2.27591	12.1696	7.78303	Distal Intergenic	6835	ENSG00000276700	RNA, 5.8S ribosomal N4
chr11	61392361	61392631	271	TMEM216	4.7234	12.1494	7.76603	Promoter (<=1kb)	0	ENSG00000187049	transmembrane protein 216
chr19	50025962	50026376	415	ZNF473	4.7234	12.1494	7.76603	Promoter (<=1kb)	0	ENSG00000142528	zinc finger protein 473
chr20	34111911	34112214	304	EIF2S2	4.7234	12.1494	7.76603	Promoter (<=1kb)	29	ENSG00000125977	eukaryotic translation initiation factor 2 subunit beta
chr9	20988	21342	355	MIR1302-9HG	5.30979	12.139	7.75898	Intron (ENST00000442898.5/100287171, intron 2 of 10)	-6315	NA	MIR1302-9 host gene
chr11	8964184	8964586	403	TMEM9B-AS1	4.98813	12.1242	7.74906	Promoter (<=1kb)	0	ENSG00000254860	TMEM9B antisense RNA 1
chr10	15860261	15860531	271	MINDY3	6.06491	12.1082	7.73384	Promoter (<=1kb)	0	ENSG00000148481	MINDY lysine 48 deubiquitinase 3
chr10	96089936	96090217	282	ENTPD1-AS1	6.06491	12.1082	7.73384	Promoter (<=1kb)	0	ENSG00000226688	ENTPD1 antisense RNA 1
chr15	83066982	83067398	417	MIR4515	6.06491	12.1082	7.73384	Promoter (<=1kb)	0	ENSG00000263643	microRNA 4515
chr22	17777305	17777630	326	LINC00528	6.06491	12.1082	7.73384	Promoter (<=1kb)	0	ENSG00000269220	long intergenic non-protein coding RNA 528
chr1	22025540	22025827	288	LINC00339	4.97708	12.098	7.72524	Promoter (<=1kb)	0	ENSG00000218510	long intergenic non-protein coding RNA 339
chr12	122225774	122226061	288	DIABLO	4.97708	12.098	7.72524	Promoter (<=1kb)	0	ENSG00000184047	diablo IAP-binding mitochondrial protein
chr20	5112823	5113367	545	TMEM230	4.97708	12.098	7.72524	Promoter (<=1kb)	0	ENSG00000089063	transmembrane protein 230
chr3	63912085	63912385	301	ATXN7	4.97708	12.098	7.72524	Promoter (<=1kb)	156	ENSG00000163635	ataxin 7
chr9	128371327	128371617	291	URM1	4.97708	12.098	7.72524	Promoter (<=1kb)	0	ENSG00000167118	ubiquitin related modifier 1
chr3	32401382	32401936	555	CMTM7	4.97708	12.098	7.72524	Intron (ENST00000349718.8/112616, intron 1 of 3)	9343	ENSG00000153551	CKLF like MARVEL transmembrane domain containing 7
chr7	148838904	148839222	319	EZH2	4.97708	12.098	7.72524	Intron (ENST00000683292.1/2146, intron 1 of 17)	7329	ENSG00000106462	enhancer of zeste 2 polycomb repressive complex 2 subunit
chr1	77683293	77683760	468	ZZZ3	6.27146	12.0795	7.70989	Promoter (<=1kb)	0	ENSG00000036549	zinc finger ZZ-type containing 3
chrX	115859136	115859467	332	DANT1	4.44831	12.0532	7.6858	Intron (ENST00000689706.1/106029310, intron 1 of 1)	18126	NA	DXZ4 associated non-coding transcript 1, proximal
chr17	47695337	47695634	298	TBKBP1	4.68364	12.0468	7.68	Promoter (<=1kb)	-51	ENSG00000198933	TBK1 binding protein 1
chr9	124512070	124512412	343	NR5A1	5.79605	11.9974	7.63291	Distal Intergenic	-4650	ENSG00000136931	nuclear receptor subfamily 5 group A member 1
chr8	141036064	141036562	499	LOC105375784	4.93376	11.9951	7.63084	Distal Intergenic	-18728	NA	uncharacterized LOC105375784
chr9	33264259	33264683	425	BAG1	5.99529	11.9804	7.61666	Promoter (<=1kb)	0	ENSG00000107262	BAG cochaperone 1
chr1	161462715	161463146	432	FCGR2A	3.18306	11.9303	7.56868	Intron (ENST00000637155.1/ENST00000637155.1, intron 1 of 4)	-42284	ENSG00000143226	Fc gamma receptor IIa
chr3	49166078	49166392	315	CCDC71	5.96108	11.9174	7.55728	Promoter (<=1kb)	0	ENSG00000177352	coiled-coil domain containing 71
chr19	49590466	49590797	332	NOSIP	5.19615	11.8913	7.53225	Promoter (<=1kb)	-204	ENSG00000142546	nitric oxide synthase interacting protein
chr21	8418774	8419388	615	MIR6724-4	2.10623	11.8464	7.4888	Intron (ENST00000651813.1/107987294, intron 2 of 6)	-13142	ENSG00000275692	microRNA 6724-4
chr11	61333226	61333511	286	TKFC	5.70559	11.8236	7.46739	Promoter (<=1kb)	0	ENSG00000149476	triokinase and FMN cyclase
chr11	90222484	90223087	604	CHORDC1	5.70559	11.8236	7.46739	Promoter (<=1kb)	0	ENSG00000110172	cysteine and histidine rich domain containing 1
chr3	28348790	28349127	338	AZI2	5.70559	11.8236	7.46739	Promoter (<=1kb)	0	ENSG00000163512	5-azacytidine induced 2
chr22_KI270733v1_random	121269	121549	281	RNA5-8SN4	2.37623	11.818	7.46324	Distal Intergenic	-7328	ENSG00000276700	RNA, 5.8S ribosomal N4
chr3	38165561	38165877	317	OXSR1	6.11683	11.8053	7.45122	Promoter (<=1kb)	0	ENSG00000172939	oxidative stress responsive kinase 1
chr12	51368855	51369387	533	GALNT6	5.89381	11.793	7.43967	Intron (ENST00000543196.6/11226, intron 3 of 10)	-8629	ENSG00000139629	polypeptide N-acetylgalactosaminyltransferase 6
chr1	202615629	202616065	437	SYT2	6.10545	11.7851	7.43211	Intron (ENST00000367267.5/127833, intron 1 of 8)	27388	ENSG00000143858	synaptotagmin 2
chr14	96363488	96363890	403	GSKIP	6.10545	11.7851	7.43211	Promoter (<=1kb)	0	ENSG00000100744	GSK3B interacting protein
chr2	196068583	196068885	303	DNAH7	6.10545	11.7851	7.43211	Promoter (<=1kb)	0	ENSG00000118997	dynein axonemal heavy chain 7
chr3	107431649	107431955	307	LINC01990	6.10545	11.7851	7.43211	Promoter (<=1kb)	719	ENSG00000273125	long intergenic non-protein coding RNA 1990
chr3	120095253	120095963	711	GSK3B-DT	6.10545	11.7851	7.43211	Promoter (<=1kb)	0	NA	GSK3B divergent transcript
chr5	181244217	181244733	517	RACK1	6.10545	11.7851	7.43211	Promoter (<=1kb)	-270	ENSG00000204628	receptor for activated C kinase 1
chr6	27146232	27146668	437	H2BC12	6.10545	11.7851	7.43211	Promoter (<=1kb)	187	ENSG00000197903	H2B clustered histone 12
chr1	122524606	122524965	360	LINC01691	1.73138	11.7672	7.41933	Distal Intergenic	-944082	NA	long intergenic non-protein coding RNA 1691
chrUn_GL000220v1	106315	106998	684	RNA5-8SN5	2.38449	11.766	7.41816	Distal Intergenic	-5027	ENSG00000274917	RNA, 5.8S ribosomal N5
chr6	42929448	42929836	389	CNPY3	6.07935	11.7385	7.39223	Promoter (<=1kb)	0	ENSG00000137161	canopy FGF signaling regulator 3
chr8	145002611	145002899	289	ZNF252P	4.22578	11.7155	7.37065	Promoter (<=1kb)	0	ENSG00000196922	zinc finger protein 252, pseudogene
chrX	115879958	115880291	334	DANT1	4.22578	11.7155	7.37065	Intron (ENST00000689706.1/106029310, intron 1 of 1)	38948	NA	DXZ4 associated non-coding transcript 1, proximal
chr12	122974824	122975130	307	OGFOD2	5.64684	11.71	7.36649	Promoter (<=1kb)	0	ENSG00000111325	2-oxoglutarate and iron dependent oxygenase domain containing 2
chr8	63168306	63169082	777	YTHDF3-DT	4.81139	11.7018	7.35873	Promoter (<=1kb)	0	ENSG00000270673	YTHDF3 divergent transcript
chr16	23557741	23558148	408	UBFD1	6.04234	11.6723	7.3306	Promoter (<=1kb)	0	ENSG00000103353	ubiquitin family domain containing 1
chr6	34757454	34757783	330	SNRPC	6.04234	11.6723	7.3306	Promoter (<=1kb)	0	ENSG00000124562	small nuclear ribonucleoprotein polypeptide C
chr11	64270100	64270733	634	GPR137	5.61792	11.6539	7.31334	Promoter (<=1kb)	38	ENSG00000173264	G protein-coupled receptor 137
chr22_KI270733v1_random	171184	171780	597	RNA5-8SN4	2.3033	11.6236	7.28394	Distal Intergenic	42307	ENSG00000276700	RNA, 5.8S ribosomal N4
chr1	160342964	160343580	617	COPA	5.414	11.6227	7.28308	Promoter (<=1kb)	0	ENSG00000122218	COPI coat complex subunit alpha
chr10	49941797	49942084	288	TIMM23B	5.414	11.6227	7.28308	Promoter (<=1kb)	0	ENSG00000204152	translocase of inner mitochondrial membrane 23 homolog B
chr3	185937634	185937984	351	TRA2B	5.414	11.6227	7.28308	Promoter (<=1kb)	3	ENSG00000136527	transformer 2 beta homolog
chr9	34126076	34126503	428	DCAF12	5.414	11.6227	7.28308	Promoter (<=1kb)	195	ENSG00000198876	DDB1 and CUL4 associated factor 12
chr8	66428977	66429465	489	RRS1-DT	5.38861	11.571	7.2353	Promoter (<=1kb)	0	ENSG00000246145	RRS1 divergent transcript
chr9	4679650	4680000	351	CDC37L1	3.98748	11.5526	7.21776	Promoter (<=1kb)	0	ENSG00000106993	cell division cycle 37 like 1, HSP90 cochaperone
chr1	226939499	226939960	462	COQ8A	5.96964	11.542	7.20741	Promoter (<=1kb)	-326	ENSG00000163050	coenzyme Q8A
chr21	8399336	8399626	291	RNA5-8SN3	2.27086	11.5406	7.20643	Intron (ENST00000623860.3/105379508, intron 2 of 6)	3729	ENSG00000275215	RNA, 5.8S ribosomal N3
chr1	20507858	20508192	335	MUL1	4.37279	11.5338	7.19983	Promoter (<=1kb)	0	ENSG00000090432	mitochondrial E3 ubiquitin protein ligase 1
chr12	124914724	124915002	279	UBC	4.37279	11.5338	7.19983	Promoter (<=1kb)	29	ENSG00000150991	ubiquitin C
chr15	101277236	101277527	292	SELENOS	4.37279	11.5338	7.19983	Promoter (<=1kb)	0	ENSG00000131871	selenoprotein S
chr2	197499750	197500109	360	HSPD1	4.37279	11.5338	7.19983	Promoter (<=1kb)	0	ENSG00000144381	heat shock protein family D (Hsp60) member 1
chr2	238288981	238289278	298	LOC112268433	4.37279	11.5338	7.19983	Promoter (<=1kb)	0	NA	uncharacterized LOC112268433
chr4	158723413	158723765	353	PPID	4.37279	11.5338	7.19983	Promoter (<=1kb)	-17	ENSG00000171497	peptidylprolyl isomerase D
chr8	102863152	102863461	310	AZIN1	4.37279	11.5338	7.19983	Promoter (<=1kb)	399	ENSG00000155096	antizyme inhibitor 1
chr21	8442448	8443016	569	RNA5-8SN1	2.49511	11.5043	7.17286	Promoter (2-3kb)	2625	ENSG00000278189	RNA, 5.8S ribosomal N1
chr19	33795689	33796013	325	KCTD15	3.88843	11.501	7.16987	Promoter (<=1kb)	0	ENSG00000153885	potassium channel tetramerization domain containing 15
chr1	23868716	23869446	731	FUCA1	6.16396	11.494	7.16338	Promoter (<=1kb)	-426	ENSG00000179163	alpha-L-fucosidase 1
chr10	43137986	43138353	368	CSGALNACT2	6.16396	11.494	7.16338	Promoter (<=1kb)	-92	ENSG00000169826	chondroitin sulfate N-acetylgalactosaminyltransferase 2
chr12	54188750	54189288	539	SMUG1	6.16396	11.494	7.16338	Promoter (<=1kb)	0	ENSG00000123415	single-strand-selective monofunctional uracil-DNA glycosylase 1
chr14	64914432	64915015	584	CHURC1-FNTB	6.16396	11.494	7.16338	Promoter (<=1kb)	0	ENSG00000125954	CHURC1-FNTB readthrough
chr16	31508021	31508354	334	RUSF1	6.16396	11.494	7.16338	Promoter (<=1kb)	0	ENSG00000140688	RUS family member 1
chr18	26133730	26134078	349	PSMA8	6.16396	11.494	7.16338	Promoter (<=1kb)	0	ENSG00000154611	proteasome 20S subunit alpha 8
chr2	178480359	178480741	383	PLEKHA3	6.16396	11.494	7.16338	Promoter (<=1kb)	0	ENSG00000116095	pleckstrin homology domain containing A3
chr6_GL000251v2_alt	4710586	4710899	314	RGL2	6.16396	11.494	7.16338	Promoter (<=1kb)	0	ENSG00000237441	ral guanine nucleotide dissociation stimulator like 2
chr20	50958514	50959063	550	MOCS3	5.73209	11.4917	7.16338	Promoter (<=1kb)	0	ENSG00000124217	molybdenum cofactor synthesis 3
chr16	89721769	89722258	490	ZNF276	3.3159	11.4875	7.16338	Promoter (<=1kb)	196	ENSG00000158805	zinc finger protein 276
chr21	8405547	8406360	814	RNA5-8SN3	2.31411	11.4878	7.16338	Exon (ENST00000623860.3/105379508, exon 3 of 7)	9940	ENSG00000275215	RNA, 5.8S ribosomal N3
chr5	139637628	139637977	350	CXXC5	6.16396	11.494	7.16338	Distal Intergenic	-9322	ENSG00000171604	CXXC finger protein 5
chr1	247332074	247332653	580	ZNF496-DT	5.17263	11.4828	7.16169	Promoter (<=1kb)	0	ENSG00000289234	ZNF496 divergent transcript
chr21	46286122	46286672	551	YBEY	5.17263	11.4828	7.16169	Promoter (<=1kb)	0	ENSG00000182362	ybeY metalloendoribonuclease
chr5	34915672	34916063	392	BRIX1	5.17263	11.4828	7.16169	Promoter (<=1kb)	0	ENSG00000113460	biogenesis of ribosomes BRX1
chr21	8469493	8469766	274	RNA5-8SN1	2.10757	11.4733	7.15395	Distal Intergenic	29670	ENSG00000278189	RNA, 5.8S ribosomal N1
chr19	44753389	44753700	312	BCL3	4.84973	11.456	7.13702	Promoter (1-2kb)	-1449	ENSG00000069399	BCL3 transcription coactivator
chr3	49339744	49340635	892	USP4	5.70081	11.4331	7.11509	Promoter (<=1kb)	0	ENSG00000114316	ubiquitin specific peptidase 4
chr22	50327197	50327594	398	DENND6B	5.5032	11.43	7.11251	Promoter (<=1kb)	-185	ENSG00000205593	DENN domain containing 6B
chr3	185282692	185282962	271	MAP3K13	5.5032	11.43	7.11251	Promoter (<=1kb)	0	ENSG00000073803	mitogen-activated protein kinase kinase kinase 13
chr21	8218158	8218543	386	RNA5-8SN2	2.3469	11.4257	7.11237	Intron (ENST00000623664.1/107987293, intron 2 of 6)	5586	ENSG00000278233	RNA, 5.8S ribosomal N2
chr1	36385626	36385916	291	STK40	4.55471	11.3918	7.08014	Promoter (<=1kb)	0	ENSG00000196182	serine/threonine kinase 40
chr12	2877285	2877585	301	RHNO1	4.96953	11.3889	7.07963	Promoter (<=1kb)	62	ENSG00000171792	RAD9-HUS1-RAD1 interacting nuclear orphan 1
chr19	14031601	14032281	681	IL27RA	4.96953	11.3889	7.07963	Promoter (<=1kb)	0	ENSG00000104998	interleukin 27 receptor subunit alpha
chr22	42614671	42615020	350	POLDIP3	4.79628	11.3307	7.02452	Promoter (<=1kb)	0	ENSG00000100227	DNA polymerase delta interacting protein 3
chr17	74463433	74463735	303	CD300A	6.05621	11.3066	7.00165	Promoter (2-3kb)	-2664	ENSG00000167851	CD300a molecule
chr2	9423035	9423437	403	ITGB1BP1	4.78566	11.3057	7.00089	Promoter (<=1kb)	0	ENSG00000119185	integrin subunit beta 1 binding protein 1
chr21	32612141	32612924	784	CFAP298-TCP10L	4.78566	11.3057	7.00089	Promoter (<=1kb)	0	ENSG00000265590	CFAP298-TCP10L readthrough
chr22	29603653	29604039	387	NF2	4.78566	11.3057	7.00089	Promoter (<=1kb)	0	ENSG00000186575	NF2, moesin-ezrin-radixin like (MERLIN) tumor suppressor
chr6	2841632	2841909	278	SERPINB1	4.78566	11.3057	7.00089	Promoter (<=1kb)	0	ENSG00000021355	serpin family B member 1
chr8	58411142	58411765	624	UBXN2B	4.78566	11.3057	7.00089	Promoter (<=1kb)	0	ENSG00000215114	UBX domain protein 2B
chr8	103414848	103415589	742	DCAF13	4.78566	11.3057	7.00089	Promoter (<=1kb)	0	ENSG00000164934	DDB1 and CUL4 associated factor 13
chr12	93677395	93677749	355	CRADD	5.08855	11.3025	7.00089	Promoter (<=1kb)	0	ENSG00000169372	CASP2 and RIPK1 domain containing adaptor with death domain
chr15	43824374	43824677	304	MFAP1	5.08855	11.3025	7.00089	Promoter (<=1kb)	13	ENSG00000140259	microfibril associated protein 1
chr19	57240214	57241010	797	ZNF805	5.08855	11.3025	7.00089	Promoter (<=1kb)	0	ENSG00000204524	zinc finger protein 805
chr20	32358964	32359244	281	ASXL1	5.08855	11.3025	7.00089	Promoter (<=1kb)	0	ENSG00000171456	ASXL transcriptional regulator 1
chr1	24321995	24322292	298	GRHL3-AS1	4.64675	11.3008	7.00089	Promoter (<=1kb)	-94	NA	GRHL3 antisense RNA 1
chr19	18291499	18292251	753	MIR3188	4.64675	11.3008	7.00089	Distal Intergenic	9422	ENSG00000267959	microRNA 3188
chr8	124539056	124539336	281	LOC105375740	4.51637	11.2936	6.99815	Promoter (<=1kb)	0	NA	uncharacterized LOC105375740
chr21	8423176	8423517	342	MIR6724-4	1.97887	11.287	6.99219	Intron (ENST00000651813.1/107987294, intron 2 of 6)	-9013	ENSG00000275692	microRNA 6724-4
chr11	2400037	2400453	417	TSSC4	5.42346	11.2732	6.97868	Promoter (<=1kb)	-35	ENSG00000184281	tumor suppressing subtransferable candidate 4
chr11	126268582	126268987	406	SRPRA	5.42346	11.2732	6.97868	Promoter (<=1kb)	0	ENSG00000182934	SRP receptor subunit alpha
chr17	82450495	82450794	300	CYBC1	5.42346	11.2732	6.97868	Promoter (<=1kb)	0	ENSG00000178927	cytochrome b-245 chaperone 1
chr2	218216926	218217409	484	ARPC2	5.42346	11.2732	6.97868	Promoter (<=1kb)	0	ENSG00000163466	actin related protein 2/3 complex subunit 2
chr17	82022538	82022844	307	CENPX	3.98015	11.2521	6.96043	Promoter (<=1kb)	0	ENSG00000169689	centromere protein X
chr3	156674401	156675065	665	TIPARP	5.97917	11.1719	6.88419	Promoter (<=1kb)	0	ENSG00000163659	TCDD inducible poly(ADP-ribose) polymerase
chr6	111483238	111483510	273	TRAF3IP2-AS1	5.76167	11.1659	6.87886	Promoter (<=1kb)	0	ENSG00000231889	TRAF3IP2 antisense RNA 1
chr17	48047708	48048021	314	NFE2L1-DT	5.17037	11.1224	6.83903	Promoter (<=1kb)	77	ENSG00000263412	NFE2L1 divergent transcript
chr6	2765529	2765874	346	WRNIP1	5.17037	11.1224	6.83903	Promoter (<=1kb)	97	ENSG00000124535	WRN helicase interacting protein 1
chr21	8410166	8410883	718	RNA5-8SN3	2.00858	11.0845	6.80428	Exon (ENST00000623860.3/105379508, exon 7 of 7)	14559	ENSG00000275215	RNA, 5.8S ribosomal N3
chr17	75131488	75131803	316	NT5C	4.09917	11.0511	6.77165	Promoter (<=1kb)	0	ENSG00000125458	5', 3'-nucleotidase, cytosolic
chr19	58362189	58362768	580	A1BG	4.09917	11.0511	6.77165	Promoter (<=1kb)	0	ENSG00000121410	alpha-1-B glycoprotein
chr21	8437130	8437736	607	RNA5-8SN1	2.23212	11.0453	6.7659	Promoter (2-3kb)	-2087	ENSG00000278189	RNA, 5.8S ribosomal N1
chr18	3247506	3248117	612	MYL12A	4.08947	11.0226	6.74427	Promoter (<=1kb)	0	ENSG00000101608	myosin light chain 12A
chr21	8438016	8438704	689	RNA5-8SN1	2.43487	11.0226	6.74427	Promoter (1-2kb)	-1119	ENSG00000278189	RNA, 5.8S ribosomal N1
chr3	12841354	12841777	424	RPL32	4.08947	11.0226	6.74427	Promoter (<=1kb)	0	ENSG00000144713	ribosomal protein L32
chr12	105107577	105108196	620	ALDH1L2	4.95908	11.0219	6.74427	Promoter (<=1kb)	0	ENSG00000136010	aldehyde dehydrogenase 1 family member L2
chr2	173965545	173965837	293	SP3	4.95908	11.0219	6.74427	Promoter (<=1kb)	-172	ENSG00000172845	Sp3 transcription factor
chr4	110196668	110197240	573	ELOVL6	4.95908	11.0219	6.74427	Promoter (1-2kb)	1126	ENSG00000170522	ELOVL fatty acid elongase 6
chrX	115868046	115868368	323	DANT1	4.08947	11.0226	6.74427	Intron (ENST00000689706.1/106029310, intron 1 of 1)	27036	NA	DXZ4 associated non-coding transcript 1, proximal
chr16	88993249	88993585	337	CBFA2T3	5.46231	10.9812	6.70674	Intron (ENST00000562040.1/ENST00000562040.1, intron 2 of 2)	-16042	ENSG00000129993	CBFA2/RUNX1 partner transcriptional co-repressor 3
chr1	156728274	156728751	478	METTL25B	4.62634	10.9275	6.65622	Promoter (<=1kb)	0	ENSG00000143303	methyltransferase like 25B
chr16	30065138	30065446	309	ALDOA	4.62634	10.9275	6.65622	Promoter (<=1kb)	-314	ENSG00000149925	aldolase, fructose-bisphosphate A
chr17	42567037	42567488	452	MLX	4.62634	10.9275	6.65622	Promoter (<=1kb)	0	ENSG00000108788	MAX dimerization protein MLX
chr8	76999857	77000147	291	PEX2	4.62634	10.9275	6.65622	Promoter (<=1kb)	0	ENSG00000164751	peroxisomal biogenesis factor 2
chr2	156333878	156334256	379	NR4A2	5.4339	10.9268	6.65609	Promoter (1-2kb)	-1116	ENSG00000153234	nuclear receptor subfamily 4 group A member 2
chr21	29019008	29019290	283	RWDD2B	5.4339	10.9268	6.65609	Promoter (<=1kb)	16	ENSG00000156253	RWD domain containing 2B
chr12	122980283	122980759	477	ARL6IP4	4.493	10.9193	6.6497	Promoter (<=1kb)	0	ENSG00000182196	ADP ribosylation factor like GTPase 6 interacting protein 4
chr19	35758177	35758486	310	PROSER3	4.89841	10.8891	6.62069	Promoter (<=1kb)	0	ENSG00000167595	proline and serine rich 3
chr8	140512105	140512378	274	CHRAC1	4.72595	10.8356	6.57037	Promoter (<=1kb)	123	ENSG00000104472	chromatin accessibility complex subunit 1
chr2	199911377	199911782	406	C2orf69	5.78411	10.8283	6.56329	Promoter (<=1kb)	71	ENSG00000178074	chromosome 2 open reading frame 69
chr16	1705853	1706158	306	MAPK8IP3	4.222	10.8187	6.55873	Promoter (<=1kb)	-8	ENSG00000138834	mitogen-activated protein kinase 8 interacting protein 3
chr19	40425241	40425804	564	SERTAD1	4.222	10.8187	6.55873	Promoter (<=1kb)	188	ENSG00000197019	SERTA domain containing 1
chr2	65432178	65432755	578	SPRED2	4.222	10.8187	6.55873	Promoter (<=1kb)	0	ENSG00000198369	sprouty related EVH1 domain containing 2
chr3	48918777	48919222	446	ARIH2	4.222	10.8187	6.55873	Promoter (<=1kb)	0	ENSG00000177479	ariadne RBR E3 ubiquitin protein ligase 2
chr4	152779875	152780326	452	ARFIP1	4.222	10.8187	6.55873	Promoter (<=1kb)	0	ENSG00000164144	ADP ribosylation factor interacting protein 1
chr2	27211638	27212221	584	ATRAID	5.16791	10.7635	6.50754	Promoter (<=1kb)	0	ENSG00000138085	all-trans retinoic acid induced differentiation factor
chr20	3889490	3890019	530	PANK2	5.16791	10.7635	6.50754	Promoter (<=1kb)	0	ENSG00000125779	pantothenate kinase 2
chr3	4978486	4979204	719	BHLHE40	5.16791	10.7635	6.50754	Promoter (<=1kb)	-233	ENSG00000134107	basic helix-loop-helix family member e40
chr2	226791164	226791997	834	IRS1	5.16791	10.7635	6.50754	Intron (ENST00000305123.6/3667, intron 1 of 1)	3249	ENSG00000169047	insulin receptor substrate 1
chr19	46736786	46737245	460	STRN4	4.6731	10.7136	6.46165	Promoter (<=1kb)	-437	ENSG00000090372	striatin 4
chrUn_GL000220v1	110531	110877	347	RNA5-8SN5	2.30652	10.7006	6.44918	Promoter (1-2kb)	-1148	ENSG00000274917	RNA, 5.8S ribosomal N5
chr8	127960424	127960700	277	MIR1205	4.80054	10.6732	6.42332	Promoter (<=1kb)	0	ENSG00000221771	microRNA 1205
chr19	5139372	5139774	403	KDM4B	4.51437	10.6575	6.4081	Intron (ENST00000611640.4/23030, intron 19 of 23)	3836	ENSG00000127663	lysine demethylase 4B
chr10	68900863	68901502	640	DDX50	4.94773	10.6553	6.40606	Promoter (<=1kb)	0	ENSG00000107625	DExD-box helicase 50
chr11	117144017	117144532	516	PAFAH1B2	4.38601	10.6497	6.40166	Promoter (<=1kb)	0	ENSG00000168092	platelet activating factor acetylhydrolase 1b catalytic subunit 2
chr15	56887249	56887523	275	LOC105370833	4.38601	10.6497	6.40166	Promoter (<=1kb)	142	ENSG00000276524	uncharacterized LOC105370833
chr3	179071511	179072042	532	ZMAT3	4.38601	10.6497	6.40166	Promoter (<=1kb)	0	ENSG00000172667	zinc finger matrin-type 3
chr8	28701247	28701748	502	EXTL3-AS1	4.38601	10.6497	6.40166	Promoter (<=1kb)	0	ENSG00000246339	EXTL3 antisense RNA 1
chr8	143267127	143267958	832	GLI4	4.38601	10.6497	6.40166	Promoter (<=1kb)	0	ENSG00000250571	GLI family zinc finger 4
chr5	177455171	177456095	925	DBN1	4.38601	10.6497	6.40166	Exon (ENST00000507881.5/80758, exon 2 of 3)	4547	ENSG00000113758	drebrin 1
chr15	63048294	63048923	630	TPM1	3.85577	10.591	6.34748	Promoter (<=1kb)	0	ENSG00000140416	tropomyosin 1
chr19	35211717	35212008	292	FAM187B	3.85577	10.591	6.34748	Distal Intergenic	16731	ENSG00000177558	family with sequence similarity 187 member B
chr15	101334202	101334552	351	PCSK6-AS1	4.76247	10.5886	6.3459	Promoter (<=1kb)	0	ENSG00000259764	PCSK6 antisense RNA 1
chr5	892499	892812	314	BRD9	4.76247	10.5886	6.3459	Promoter (<=1kb)	0	ENSG00000028310	bromodomain containing 9
chr14	54567146	54567441	296	SAMD4A	5.44549	10.5839	6.34227	Promoter (<=1kb)	10	ENSG00000020577	sterile alpha motif domain containing 4A
chr16	3282692	3283086	395	ZNF263	5.44549	10.5839	6.34227	Promoter (<=1kb)	-399	ENSG00000006194	zinc finger protein 263
chr16	47460975	47461546	572	PHKB	5.44549	10.5839	6.34227	Promoter (<=1kb)	0	ENSG00000102893	phosphorylase kinase regulatory subunit beta
chr18	13726536	13727137	602	FAM210A	4.24448	10.5838	6.34227	Promoter (<=1kb)	0	ENSG00000177150	family with sequence similarity 210 member A
chr11	843882	844306	425	TSPAN4	5.24297	10.558	6.31935	Promoter (<=1kb)	0	ENSG00000214063	tetraspanin 4
chr15	74099940	74100289	350	ISLR2	4.3491	10.5559	6.31733	Promoter (<=1kb)	-22	ENSG00000167178	immunoglobulin superfamily containing leucine rich repeat 2
chr8	102864323	102864776	454	MAILR	4.3491	10.5559	6.31733	Promoter (<=1kb)	0	NA	macrophage interferon regulatory lncRNA
chr14	16869295	16869622	328	OR11H12	5.24114	10.5545	6.31678	Distal Intergenic	-1731495	ENSG00000257115	olfactory receptor family 11 subfamily H member 12
chr16	89240882	89241414	533	ZNF778	4.60443	10.554	6.31678	Distal Intergenic	16248	ENSG00000170100	zinc finger protein 778
chr11	110093484	110093818	335	ZC3H12C	5.24114	10.5545	6.31678	Promoter (<=1kb)	92	ENSG00000149289	zinc finger CCCH-type containing 12C
chr3	160399713	160400025	313	IFT80	5.24114	10.5545	6.31678	Promoter (<=1kb)	0	ENSG00000068885	intraflagellar transport 80
chr6	170553076	170553349	274	PSMB1	5.24114	10.5545	6.31678	Promoter (<=1kb)	0	ENSG00000008018	proteasome 20S subunit beta 1
chr7	103074859	103075140	282	ARMC10	5.24114	10.5545	6.31678	Promoter (<=1kb)	0	ENSG00000170632	armadillo repeat containing 10
chr8	53843058	53843536	479	ATP6V1H	5.24114	10.5545	6.31678	Promoter (<=1kb)	0	ENSG00000047249	ATPase H+ transporting V1 subunit H
chr22	41688851	41689254	404	SNU13	4.60443	10.554	6.31678	Promoter (<=1kb)	0	ENSG00000100138	small nuclear ribonucleoprotein 13
chr9	137277761	137278254	494	TOR4A	4.60443	10.554	6.31678	Promoter (<=1kb)	35	ENSG00000198113	torsin family 4 member A
chr14	100214195	100214806	612	YY1	4.46803	10.5447	6.31236	Intron (ENST00000554537.1/ENST00000554537.1, intron 1 of 1)	-24338	ENSG00000100811	YY1 transcription factor
chr9	133335973	133336311	339	SURF6	4.46803	10.5447	6.31236	Promoter (<=1kb)	0	ENSG00000148296	surfeit 6
chr11	43942193	43942489	297	C11orf96	4.59423	10.5302	6.29917	Promoter (<=1kb)	-148	ENSG00000187479	chromosome 11 open reading frame 96
chr11	85664824	85665145	322	CREBZF	4.59423	10.5302	6.29917	Promoter (<=1kb)	0	ENSG00000137504	CREB/ATF bZIP transcription factor
chr12	122895913	122896368	456	VPS37B	4.59423	10.5302	6.29917	Promoter (<=1kb)	0	ENSG00000139722	VPS37B subunit of ESCRT-I
chr16	88701019	88701508	490	RNF166	4.59423	10.5302	6.29917	Promoter (<=1kb)	142	ENSG00000158717	ring finger protein 166
chr18	36129117	36129751	635	SLC39A6	4.59423	10.5302	6.29917	Promoter (<=1kb)	0	ENSG00000141424	solute carrier family 39 member 6
chr19	9621208	9621721	514	ZNF561-AS1	4.59423	10.5302	6.29917	Promoter (<=1kb)	0	ENSG00000267106	ZNF561 antisense RNA 1 (head to head)
chr3	194140718	194141214	497	HES1	4.59423	10.5302	6.29917	Distal Intergenic	4570	ENSG00000114315	hes family bHLH transcription factor 1
chr4	143854900	143855192	293	LOC101927636	5.41577	10.5285	6.29917	Intron (ENST00000641328.1/105377459, intron 3 of 6)	-3784	ENSG00000251600	uncharacterized LOC101927636
chr18	55362236	55362565	330	TCF4	5.82152	10.5194	6.29314	Intron (ENST00000354452.8/6925, intron 6 of 19)	-10213	ENSG00000196628	transcription factor 4
chr15	34342823	34343393	571	NUTM1	5.82152	10.5194	6.29314	Promoter (<=1kb)	0	ENSG00000184507	NUT midline carcinoma family member 1
chr19	57599876	57600257	382	ZNF530	5.82152	10.5194	6.29314	Promoter (<=1kb)	0	ENSG00000183647	zinc finger protein 530
chr4	83455487	83455812	326	HELQ	5.82152	10.5194	6.29314	Promoter (<=1kb)	0	ENSG00000163312	helicase, POLQ like
chr5	34244816	34245154	339	C1QTNF3	5.82152	10.5194	6.29314	Promoter (<=1kb)	-20	ENSG00000082196	C1q and TNF related 3
chr7	45111364	45112071	708	TBRG4	5.82152	10.5194	6.29314	Promoter (<=1kb)	0	ENSG00000136270	transforming growth factor beta regulator 4
chrX	14029728	14030177	450	GEMIN8	5.82152	10.5194	6.29314	Promoter (<=1kb)	0	ENSG00000046647	gem nuclear organelle associated protein 8
chr5	49233824	49234139	316	EMB	5.82152	10.5194	6.29314	Distal Intergenic	1177859	ENSG00000170571	embigin
chr9	43974367	43974643	277	LOC102724904	5.82152	10.5194	6.29314	Distal Intergenic	845399	ENSG00000286506	methylenetetrahydrofolate dehydrogenase (NADP+ dependent) 1 like pseudogene
chr19	17419769	17420358	590	MVB12A	5.21679	10.507	6.28874	Promoter (<=1kb)	0	ENSG00000141971	multivesicular body subunit 12A
chr1	122669947	122670249	303	LINC01691	4.86731	10.4841	6.26647	Distal Intergenic	-1089423	NA	long intergenic non-protein coding RNA 1691
chr10	70331462	70331838	377	LRRC20	4.86731	10.4841	6.26647	Intron (ENST00000395011.5/55222, intron 2 of 3)	44941	ENSG00000172731	leucine rich repeat containing 20
chr17	45226181	45226585	405	FMNL1-DT	4.86731	10.4841	6.26647	Intron (ENST00000331495.8/752, intron 1 of 26)	-3959	ENSG00000267121	FMNL1 divergent transcript
chr14	24232645	24233182	538	GMPR2	4.86731	10.4841	6.26647	Promoter (<=1kb)	0	ENSG00000100938	guanosine monophosphate reductase 2
chr14	35122030	35122550	521	PPP2R3C	4.86731	10.4841	6.26647	Promoter (<=1kb)	0	ENSG00000092020	protein phosphatase 2 regulatory subunit B''gamma
chr22	43263988	43264451	464	SCUBE1	4.86731	10.4841	6.26647	Promoter (1-2kb)	-1189	ENSG00000159307	signal peptide, CUB domain and EGF like domain containing 1
chr3	183635674	183636034	361	KLHL24	4.86731	10.4841	6.26647	Promoter (<=1kb)	31	ENSG00000114796	kelch like family member 24
chr7	151232204	151232743	540	CHPF2	4.86731	10.4841	6.26647	Promoter (<=1kb)	0	ENSG00000033100	chondroitin polymerizing factor 2
chr8	10054305	10054819	515	MSRA	4.86731	10.4841	6.26647	Promoter (<=1kb)	0	ENSG00000175806	methionine sulfoxide reductase A
chr8	91040503	91040807	305	PIP4P2	4.86731	10.4841	6.26647	Promoter (<=1kb)	0	ENSG00000155099	phosphatidylinositol-4,5-bisphosphate 4-phosphatase 2
chr14	72741959	72742550	592	DPF3	5.38637	10.4736	6.26071	Promoter (<=1kb)	161	ENSG00000205683	double PHD fingers 3
chr21	8401235	8401544	310	RNA5-8SN3	2.33439	10.4557	6.24371	Intron (ENST00000623860.3/105379508, intron 2 of 6)	5628	ENSG00000275215	RNA, 5.8S ribosomal N3
chr6	20403608	20403927	320	E2F3	3.89535	10.4441	6.23243	Promoter (<=1kb)	0	ENSG00000112242	E2F transcription factor 3
chr1	23530721	23531220	500	E2F2	5.1652	10.4062	6.19591	Promoter (<=1kb)	13	ENSG00000007968	E2F transcription factor 2
chr11	69674995	69675274	280	LTO1	5.1652	10.4062	6.19591	Promoter (<=1kb)	0	ENSG00000149716	LTO1 maturation factor of ABCE1
chr17	64020360	64020638	279	ICAM2	5.1652	10.4062	6.19591	Promoter (<=1kb)	0	ENSG00000108622	intercellular adhesion molecule 2
chr9	120876217	120877023	807	PHF19	5.1652	10.4062	6.19591	Promoter (<=1kb)	0	ENSG00000119403	PHD finger protein 19
chrX	1391768	1392139	372	SLC25A6	5.1652	10.4062	6.19591	Promoter (<=1kb)	0	ENSG00000169100	solute carrier family 25 member 6
chr12	123712290	123712561	272	ATP6V0A2	5.13978	10.3563	6.15019	Promoter (<=1kb)	0	ENSG00000185344	ATPase H+ transporting V0 subunit a2
chr3	184362918	184363270	353	POLR2H	5.30006	10.3117	6.10833	Promoter (<=1kb)	0	ENSG00000163882	RNA polymerase II, I and III subunit H
chr9	33523805	33524193	389	ANKRD18B	5.4903	10.3031	6.10001	Promoter (<=1kb)	-58	ENSG00000230453	ankyrin repeat domain 18B
chr2	38602626	38602967	342	HNRNPLL	4.93536	10.2894	6.08658	Promoter (<=1kb)	0	ENSG00000143889	heterogeneous nuclear ribonucleoprotein L like
chr20	27390662	27390950	289	MIR663AHG	4.93536	10.2894	6.08658	Distal Intergenic	-1139126	ENSG00000227195	MIR663A host gene
chr19	27132896	27133214	319	LOC105372345	2.25889	10.2806	6.0789	Distal Intergenic	552041	NA	uncharacterized LOC105372345
chr19	12945916	12946213	298	RAD23A	4.61606	10.2601	6.05996	Promoter (<=1kb)	0	ENSG00000179262	RAD23 homolog A, nucleotide excision repair protein
chr7	100100373	100100778	406	MCM7	4.12046	10.2518	6.05189	Promoter (<=1kb)	0	ENSG00000166508	minichromosome maintenance complex component 7
chr22	37229776	37230102	327	RAC2	5.45842	10.2455	6.04584	Promoter (1-2kb)	1401	ENSG00000128340	Rac family small GTPase 2
chr5	271626	271905	280	PDCD6	5.45842	10.2455	6.04584	Promoter (<=1kb)	0	ENSG00000249915	programmed cell death 6
chr22	21938247	21938541	295	PPM1F-AS1	4.74347	10.2177	6.02123	Promoter (<=1kb)	0	NA	PPM1F antisense RNA 1
chr3	66220799	66221254	456	SLC25A26	5.647	10.2171	6.02123	Promoter (<=1kb)	0	ENSG00000144741	solute carrier family 25 member 26
chr1	228406477	228406792	316	TRIM11	4.58085	10.1804	5.9886	Promoter (<=1kb)	8	ENSG00000154370	tripartite motif containing 11
chr11	61967426	61968249	824	FTH1	4.58085	10.1804	5.9886	Promoter (<=1kb)	0	ENSG00000167996	ferritin heavy chain 1
chr6	157021240	157021524	285	ARID1B	4.58085	10.1804	5.9886	Promoter (<=1kb)	-762	ENSG00000049618	AT-rich interaction domain 1B
chr17	50149523	50150080	558	PPP1R9B	5.04057	10.1607	5.97106	Promoter (<=1kb)	597	ENSG00000108819	protein phosphatase 1 regulatory subunit 9B
chr21	8470873	8471694	822	RNA5-8SN1	1.83476	10.1437	5.95456	Distal Intergenic	31050	ENSG00000278189	RNA, 5.8S ribosomal N1
chr13	18031373	18031672	300	FAM230C	4.07122	10.1186	5.93007	Distal Intergenic	-163625	ENSG00000279516	family with sequence similarity 230 member C
chr10	124994628	124994903	276	CTBP2	5.57607	10.0934	5.90792	Exon (ENST00000309035.11/1488, exon 5 of 9)	8097	ENSG00000175029	C-terminal binding protein 2
chr1	84505644	84506135	492	GNG5	5.1622	10.0508	5.86696	Promoter (<=1kb)	0	ENSG00000174021	G protein subunit gamma 5
chr15	75029885	75030171	287	PPCDC	5.1622	10.0508	5.86696	Promoter (1-2kb)	1636	ENSG00000138621	phosphopantothenoylcysteine decarboxylase
chr6	125749546	125749911	366	HEY2	5.1622	10.0508	5.86696	Promoter (<=1kb)	0	ENSG00000135547	hes related family bHLH transcription factor with YRPW motif 2
chr8	30095185	30096017	833	LEPROTL1	5.1622	10.0508	5.86696	Promoter (<=1kb)	0	ENSG00000104660	leptin receptor overlapping transcript like 1
chr21	8249718	8250192	475	MIR6724-2	2.14001	10.0348	5.85314	Promoter (<=1kb)	213	ENSG00000274060	microRNA 6724-2
chr22_KI270733v1_random	179023	179295	273	RNA5-8SN4	2.54122	9.99302	5.81288	Distal Intergenic	50146	ENSG00000276700	RNA, 5.8S ribosomal N4
chr8	144827500	144827819	320	ZNF7	3.66111	9.97561	5.79602	Promoter (<=1kb)	0	ENSG00000147789	zinc finger protein 7
chr12	123364968	123365239	272	SBNO1-AS1	5.5069	9.9723	5.79285	Promoter (<=1kb)	20	ENSG00000256092	SBNO1 antisense RNA 1
chr19	34962139	34963032	894	ZNF792	4.94512	9.9708	5.79171	Promoter (1-2kb)	1197	ENSG00000180884	zinc finger protein 792
chr19	50511061	50511364	304	JOSD2	4.94512	9.9708	5.79171	Promoter (<=1kb)	0	ENSG00000161677	Josephin domain containing 2
chr21	8222956	8223326	371	RNA5-8SN2	2.10368	9.97029	5.79136	Exon (ENST00000623664.1/107987293, exon 3 of 7)	10384	ENSG00000278233	RNA, 5.8S ribosomal N2
chr12	43806018	43806312	295	TWF1	3.73139	9.9433	5.76539	Promoter (<=1kb)	0	ENSG00000151239	twinfilin actin binding protein 1
chr19	27144797	27145077	281	LOC105372345	1.79491	9.93342	5.75651	Distal Intergenic	540178	NA	uncharacterized LOC105372345
chr10	43455225	43455563	339	ZNF487	4.92182	9.9242	5.74757	Intron (ENST00000315429.11/642819, intron 1 of 3)	18067	ENSG00000243660	zinc finger protein 487
chr1	64966046	64966331	286	JAK1	4.92182	9.9242	5.74757	Promoter (<=1kb)	0	ENSG00000162434	Janus kinase 1
chr17	75516053	75516420	368	TSEN54	4.92182	9.9242	5.74757	Promoter (<=1kb)	0	ENSG00000182173	tRNA splicing endonuclease subunit 54
chr19	55152026	55152387	362	TNNI3	4.92182	9.9242	5.74757	Promoter (2-3kb)	2019	ENSG00000129991	troponin I3, cardiac type
chr2	96536759	96537060	302	ARID5A	4.92182	9.9242	5.74757	Promoter (<=1kb)	0	ENSG00000196843	AT-rich interaction domain 5A
chr9	35749006	35749281	276	GBA2	4.92182	9.9242	5.74757	Promoter (<=1kb)	0	ENSG00000070610	glucosylceramidase beta 2
chr12	96399840	96400373	534	CDK17	4.21732	9.92378	5.74757	Promoter (<=1kb)	0	ENSG00000059758	cyclin dependent kinase 17
chr17	60392337	60392665	329	CHCT1	4.21732	9.92378	5.74757	Promoter (<=1kb)	0	ENSG00000141371	CHD1 helical C-terminal domain containing 1
chr19	51224831	51225391	561	CD33	4.21732	9.92378	5.74757	Promoter (<=1kb)	0	ENSG00000105383	CD33 molecule
chr20	44475843	44476125	283	TTPAL	4.21732	9.92378	5.74757	Promoter (<=1kb)	0	ENSG00000124120	alpha tocopherol transfer protein like
chr3	120093977	120094443	467	GSK3B	4.21732	9.92378	5.74757	Promoter (<=1kb)	4	ENSG00000082701	glycogen synthase kinase 3 beta
chr8	141414994	141415515	522	PTP4A3	4.21732	9.92378	5.74757	Promoter (<=1kb)	-563	ENSG00000184489	protein tyrosine phosphatase 4A3
chr19	55648028	55648454	427	CCDC106	4.3338	9.91283	5.74153	Promoter (<=1kb)	0	ENSG00000173581	coiled-coil domain containing 106
chr17	19088862	19089386	525	LOC102724624	5.47295	9.91268	5.7414	Distal Intergenic	-3588	NA	uncharacterized protein ENSP00000382042-like
chr21	42010696	42011055	360	ZBTB21	5.08288	9.89942	5.73048	Promoter (<=1kb)	-309	ENSG00000173276	zinc finger and BTB domain containing 21
chr1	117929184	117929583	400	GDAP2	5.46277	9.89478	5.72603	Promoter (<=1kb)	0	ENSG00000196505	ganglioside induced differentiation associated protein 2
chr1	225777886	225778206	321	SRP9	5.46277	9.89478	5.72603	Promoter (<=1kb)	0	ENSG00000143742	signal recognition particle 9
chr14	92794369	92794825	457	GOLGA5	5.46277	9.89478	5.72603	Promoter (<=1kb)	64	ENSG00000066455	golgin A5
chr17	35587216	35587488	273	AP2B1	5.46277	9.89478	5.72603	Promoter (<=1kb)	0	ENSG00000006125	adaptor related protein complex 2 subunit beta 1
chr2	214809285	214809644	360	BARD1	5.46277	9.89478	5.72603	Promoter (<=1kb)	0	ENSG00000138376	BRCA1 associated RING domain 1
chr3	172750927	172751223	297	ECT2	5.46277	9.89478	5.72603	Promoter (<=1kb)	0	ENSG00000114346	epithelial cell transforming 2
chr4	13627775	13628061	287	MIR5091	5.46277	9.89478	5.72603	Promoter (<=1kb)	0	ENSG00000266240	microRNA 5091
chr5	61162275	61162780	506	SMIM15-AS1	5.46277	9.89478	5.72603	Promoter (<=1kb)	0	NA	SMIM15 antisense RNA 1
chr6	108294820	108295253	434	AFG1L	5.46277	9.89478	5.72603	Promoter (<=1kb)	0	ENSG00000135537	AFG1 like ATPase
chr6	110981767	110982408	642	RPF2	5.46277	9.89478	5.72603	Promoter (<=1kb)	0	ENSG00000197498	ribosome production factor 2 homolog
chr8	143018741	143019206	466	LY6E	5.46277	9.89478	5.72603	Promoter (<=1kb)	184	ENSG00000160932	lymphocyte antigen 6 family member E
chr2	216074157	216074672	516	PECR	5.46277	9.89478	5.72603	Intron (ENST00000442122.5/55825, intron 1 of 7)	7073	ENSG00000115425	peroxisomal trans-2-enoyl-CoA reductase
chr8	42412654	42413089	436	VDAC3	5.46277	9.89478	5.72603	Distal Intergenic	9622	ENSG00000078668	voltage dependent anion channel 3
chr21	8238355	8239231	877	MIR6724-2	1.88468	9.86292	5.69956	Exon (ENST00000652328.1/ENST00000652328.1, exon 1 of 1)	-10274	ENSG00000274060	microRNA 6724-2
chr21	8463417	8463963	547	RNA5-8SN1	2.00526	9.83384	5.67375	Distal Intergenic	23594	ENSG00000278189	RNA, 5.8S ribosomal N1
chr12	113185104	113185743	640	DDX54	4.55541	9.80653	5.64761	Promoter (<=1kb)	0	ENSG00000123064	DEAD-box helicase 54
chr2	200963352	200963660	309	ORC2	4.55541	9.80653	5.64761	Promoter (<=1kb)	0	ENSG00000115942	origin recognition complex subunit 2
chr2	181456915	181457193	279	ITGA4	4.2893	9.80547	5.64752	Promoter (<=1kb)	-9	ENSG00000115232	integrin subunit alpha 4
chr10	73865280	73865920	641	CAMK2G	5.4063	9.79525	5.63851	Intron (ENST00000351293.7/818, intron 2 of 18)	-4419	ENSG00000148660	calcium/calmodulin dependent protein kinase II gamma
chr19	11435562	11435856	295	ODAD3	3.85616	9.79249	5.63669	Promoter (<=1kb)	0	ENSG00000198003	outer dynein arm docking complex subunit 3
chr22_KI270733v1_random	160198	160613	416	RNA5-8SN4	1.91303	9.78423	5.62903	Distal Intergenic	31321	ENSG00000276700	RNA, 5.8S ribosomal N4
chr1	161013680	161013952	273	F11R	4.4028	9.77211	5.61726	Intron (ENST00000368026.11/50848, intron 1 of 9)	7144	ENSG00000158769	F11 receptor
chr1	38990925	38991291	367	AKIRIN1	4.4028	9.77211	5.61726	Promoter (<=1kb)	0	ENSG00000174574	akirin 1
chr15	57706695	57706993	299	LOC105370834	4.4028	9.77211	5.61726	Promoter (<=1kb)	0	NA	uncharacterized LOC105370834
chr2	70085978	70086302	325	ASPRV1	4.4028	9.77211	5.61726	Promoter (<=1kb)	0	ENSG00000179818	aspartic peptidase retroviral like 1
chr1	11740748	11741418	671	AGTRAP	5.37358	9.73742	5.58761	Intron (ENST00000376637.7/57085, intron 1 of 3)	-4383	ENSG00000177674	angiotensin II receptor associated protein
chr19	11505464	11505821	358	ZNF653	3.20073	9.70965	5.56073	Promoter (<=1kb)	0	ENSG00000161914	zinc finger protein 653
chr21	11769511	11769851	341	TPTE	3.20073	9.70965	5.56073	Distal Intergenic	1247928	ENSG00000274391	transmembrane phosphatase with tensin homology
chr1	203121405	203122183	779	ADORA1	4.97908	9.69977	5.55174	Intron (ENST00000309502.7/134, intron 2 of 5)	-4882	ENSG00000163485	adenosine A1 receptor
chr11	65893839	65894262	424	CCDC85B	4.97908	9.69977	5.55174	5' UTR	3166	ENSG00000175602	coiled-coil domain containing 85B
chr14	102525504	102525774	271	MIR4309	5.15888	9.698	5.55174	Distal Intergenic	-13870	ENSG00000266015	microRNA 4309
chr16	1249042	1249424	383	TPSD1	4.97908	9.69977	5.55174	Distal Intergenic	-6635	ENSG00000095917	tryptase delta 1
chr18	79519991	79520277	287	NFATC1	4.97908	9.69977	5.55174	Intron (ENST00000253506.9/4772, intron 9 of 9)	-3647	ENSG00000131196	nuclear factor of activated T cells 1
chr12	48851740	48852198	459	DDX23	4.97908	9.69977	5.55174	Promoter (<=1kb)	0	ENSG00000174243	DEAD-box helicase 23
chr12	132887907	132888197	291	CHFR-DT	4.97908	9.69977	5.55174	Promoter (<=1kb)	65	ENSG00000236617	CHFR divergent transcript
chr16	75622978	75623269	292	ADAT1	4.97908	9.69977	5.55174	Promoter (<=1kb)	0	ENSG00000065457	adenosine deaminase tRNA specific 1
chr19	29715242	29715838	597	C19orf12	4.97908	9.69977	5.55174	Promoter (<=1kb)	0	ENSG00000131943	chromosome 19 open reading frame 12
chr3	119579530	119579906	377	ADPRH	4.97908	9.69977	5.55174	Promoter (<=1kb)	0	ENSG00000144843	ADP-ribosylarginine hydrolase
chr3	194136773	194137277	505	HES1	4.97908	9.69977	5.55174	Promoter (<=1kb)	625	ENSG00000114315	hes family bHLH transcription factor 1
chr5	179623164	179623609	446	HNRNPH1	4.97908	9.69977	5.55174	Promoter (<=1kb)	0	ENSG00000169045	heterogeneous nuclear ribonucleoprotein H1
chr6_GL000251v2_alt	3019096	3019465	370	ATP6V1G2-DDX39B	4.97908	9.69977	5.55174	Promoter (<=1kb)	0	ENSG00000254870	ATP6V1G2-DDX39B readthrough (NMD candidate)
chr7	158829726	158830002	277	ESYT2	4.97908	9.69977	5.55174	Promoter (<=1kb)	-98	ENSG00000117868	extended synaptotagmin 2
chr1	52552760	52553047	288	TUT4	5.15888	9.698	5.55174	Promoter (<=1kb)	0	ENSG00000134744	terminal uridylyl transferase 4
chr11	71929006	71929290	285	RNF121	5.15888	9.698	5.55174	Promoter (<=1kb)	0	ENSG00000137522	ring finger protein 121
chr14	69397866	69398202	337	SLC39A9	5.15888	9.698	5.55174	Promoter (<=1kb)	0	ENSG00000029364	solute carrier family 39 member 9
chr2	17753837	17754326	490	GEN1	5.15888	9.698	5.55174	Promoter (<=1kb)	0	ENSG00000178295	GEN1 Holliday junction 5' flap endonuclease
chr5	34656330	34656815	486	RAI14	5.15888	9.698	5.55174	Promoter (<=1kb)	0	ENSG00000039560	retinoic acid induced 14
chr19	47336003	47336297	295	C5AR2	4.80853	9.69622	5.55174	Promoter (<=1kb)	-817	ENSG00000134830	complement C5a receptor 2
chr15	58331983	58332265	283	ALDH1A2	5.34125	9.68017	5.544	Intron (ENST00000558239.5/8854, intron 2 of 3)	-52662	ENSG00000128918	aldehyde dehydrogenase 1 family member A2
chr1	2194898	2195294	397	FAAP20	4.64607	9.68471	5.544	Promoter (<=1kb)	-123	ENSG00000162585	FA core complex associated protein 20
chr12	123458043	123458328	286	SNRNP35	4.64607	9.68471	5.544	Promoter (<=1kb)	0	ENSG00000184209	small nuclear ribonucleoprotein U11/U12 subunit 35
chr17	64836766	64837457	692	PLEKHM1P1	4.64607	9.68471	5.544	Promoter (<=1kb)	0	ENSG00000214176	pleckstrin homology and RUN domain containing M1 pseudogene 1
chr2	102355702	102356001	300	IL18R1	4.64607	9.68471	5.544	Promoter (<=1kb)	0	ENSG00000115604	interleukin 18 receptor 1
chr22	26672752	26673419	668	MIATNB	4.64607	9.68471	5.544	Promoter (<=1kb)	0	NA	MIAT neighbor
chr3	30606993	30607510	518	TGFBR2	4.64607	9.68471	5.544	Promoter (<=1kb)	392	ENSG00000163513	transforming growth factor beta receptor 2
chr3	127589921	127590403	483	TPRA1	4.64607	9.68471	5.544	Promoter (<=1kb)	296	ENSG00000163870	transmembrane protein adipocyte associated 1
chr7	149126304	149126661	358	ZNF425	4.64607	9.68471	5.544	Promoter (<=1kb)	0	ENSG00000204947	zinc finger protein 425
chr8	232392	232781	390	ZNF596	4.64607	9.68471	5.544	Promoter (<=1kb)	0	ENSG00000172748	zinc finger protein 596
chr9	129823886	129824236	351	TOR1A	4.64607	9.68471	5.544	Promoter (<=1kb)	0	ENSG00000136827	torsin family 1 member A
chr18	74597847	74598117	271	ZNF407	3.81684	9.67916	5.54389	Promoter (<=1kb)	0	ENSG00000215421	zinc finger protein 407
chr19	43935051	43935535	485	ZNF45	3.81684	9.67916	5.54389	Promoter (<=1kb)	0	ENSG00000124459	zinc finger protein 45
chr21	39349461	39349997	537	HMGN1	3.81684	9.67916	5.54389	Promoter (<=1kb)	0	ENSG00000205581	high mobility group nucleosome binding domain 1
chr1	156706582	156706885	304	CRABP2	4.95595	9.65503	5.52176	Promoter (<=1kb)	-766	ENSG00000143320	cellular retinoic acid binding protein 2
chr8	143291088	143291590	503	ZNF696	3.89295	9.62879	5.49668	Promoter (<=1kb)	0	ENSG00000185730	zinc finger protein 696
chr7	152464251	152464564	314	LINC01003	3.34913	9.62324	5.49159	Promoter (<=1kb)	465	ENSG00000261455	long intergenic non-protein coding RNA 1003
chr21	8209764	8211399	1636	RNA45SN2	2.04809	9.5876	5.45823	Promoter (<=1kb)	920	NA	RNA, 45S pre-ribosomal N2
chr21	8459389	8460654	1266	RNA5-8SN1	2.04809	9.5876	5.45823	Distal Intergenic	19566	ENSG00000278189	RNA, 5.8S ribosomal N1
chr21	8468760	8469030	271	RNA5-8SN1	2.04809	9.5876	5.45823	Distal Intergenic	28937	ENSG00000278189	RNA, 5.8S ribosomal N1
chr1	111515597	111516178	582	TMIGD3	5.47908	9.56934	5.44045	Intron (ENST00000369717.8/57413, intron 1 of 5)	-11964	ENSG00000121933	transmembrane and immunoglobulin domain containing 3
chr17	19162832	19163245	414	GRAPL-AS1	5.47908	9.56934	5.44045	Distal Intergenic	-3721	NA	GRAPL antisense RNA 1
chr1	27959938	27960427	490	XKR8	5.47908	9.56934	5.44045	Promoter (<=1kb)	0	ENSG00000158156	XK related 8
chr12	8227284	8227558	275	FAM90A1	5.47908	9.56934	5.44045	Promoter (<=1kb)	29	ENSG00000171847	family with sequence similarity 90 member A1
chr15	94231484	94231798	315	MCTP2	5.47908	9.56934	5.44045	Promoter (<=1kb)	0	ENSG00000140563	multiple C2 and transmembrane domain containing 2
chr16	53054654	53054943	290	CHD9	5.47908	9.56934	5.44045	Promoter (<=1kb)	-48	ENSG00000177200	chromodomain helicase DNA binding protein 9
chr19	1905744	1906102	359	SCAMP4	5.47908	9.56934	5.44045	Promoter (<=1kb)	340	ENSG00000227500	secretory carrier membrane protein 4
chr4	68349742	68350019	278	YTHDC1	5.47908	9.56934	5.44045	Promoter (<=1kb)	0	ENSG00000083896	YTH domain containing 1
chr5	140664536	140664976	441	WDR55	5.47908	9.56934	5.44045	Promoter (<=1kb)	0	ENSG00000120314	WD repeat domain 55
chr5	150357789	150358110	322	TCOF1	5.47908	9.56934	5.44045	Promoter (<=1kb)	6	ENSG00000070814	treacle ribosome biogenesis factor 1
chr5	178204553	178204887	335	HNRNPAB	5.47908	9.56934	5.44045	Promoter (<=1kb)	0	ENSG00000197451	heterogeneous nuclear ribonucleoprotein A/B
chr6	136550548	136550921	374	MAP7	5.47908	9.56934	5.44045	Promoter (<=1kb)	0	ENSG00000135525	microtubule associated protein 7
chr8	143684246	143684681	436	ZNF707	5.47908	9.56934	5.44045	Promoter (<=1kb)	0	ENSG00000181135	zinc finger protein 707
chr17	75271341	75271692	352	MIF4GD-DT	4.90694	9.55995	5.44045	Promoter (<=1kb)	0	ENSG00000263843	MIF4GD divergent transcript
chr17	76726883	76727194	312	METTL23	4.90694	9.55995	5.44045	Promoter (<=1kb)	0	ENSG00000181038	methyltransferase like 23
chr3	126530106	126530539	434	CHST13	5.47908	9.56934	5.44045	Intron (ENST00000319340.7/166012, intron 1 of 2)	5951	ENSG00000180767	carbohydrate sulfotransferase 13
chr22_KI270733v1_random	134523	134796	274	RNA5-8SN4	2.18444	9.51379	5.3988	Distal Intergenic	5646	ENSG00000276700	RNA, 5.8S ribosomal N4
chr21	8225476	8226770	1295	RNA5-8SN2	1.82313	9.50754	5.39325	Exon (ENST00000623664.1/107987293, exon 6 of 7)	12904	ENSG00000278233	RNA, 5.8S ribosomal N2
chr21	8227067	8227917	851	RNA5-8SN2	1.88453	9.49557	5.38199	Exon (ENST00000623664.1/107987293, exon 7 of 7)	14495	ENSG00000278233	RNA, 5.8S ribosomal N2
chrUn_GL000220v1	134867	135372	506	RNA5-8SN5	1.94689	9.49493	5.38137	Distal Intergenic	22842	ENSG00000274917	RNA, 5.8S ribosomal N5
chr21	8251386	8251887	502	MIR6724-2	2.16929	9.4851	5.37255	Promoter (1-2kb)	1881	ENSG00000274060	microRNA 6724-2
chr1	35930876	35931614	739	AGO3	4.70034	9.4762	5.36406	Promoter (<=1kb)	0	ENSG00000126070	argonaute RISC catalytic component 3
chr8	142738893	142739780	888	SLURP1	4.70034	9.4762	5.36406	Promoter (2-3kb)	2626	ENSG00000126233	secreted LY6/PLAUR domain containing 1
chr22	41544183	41544478	296	POLR3H	5.4182	9.46493	5.35462	Promoter (<=1kb)	0	ENSG00000100413	RNA polymerase III subunit H
chr19	58228731	58229103	373	ZNF8-ERVK3-1	3.92043	9.43389	5.32496	Promoter (<=1kb)	0	ENSG00000267216	ZNF8-ERVK3-1 readthrough
chr22	37608503	37609052	550	GGA1	3.92043	9.43389	5.32496	Promoter (<=1kb)	0	ENSG00000100083	golgi associated, gamma adaptin ear containing, ARF binding protein 1
chr1	21783338	21783609	272	USP48	4.52786	9.4325	5.32496	Promoter (<=1kb)	0	ENSG00000090686	ubiquitin specific peptidase 48
chr16	85799722	85800037	316	COX4I1	4.25623	9.42974	5.32408	Promoter (<=1kb)	0	ENSG00000131143	cytochrome c oxidase subunit 4I1
chr8	123768498	123768902	405	FAM91A1	3.72835	9.42185	5.31703	Promoter (<=1kb)	0	ENSG00000176853	family with sequence similarity 91 member A1
chr13	80339942	80340407	466	SPRY2	4.38169	9.41924	5.31477	Promoter (<=1kb)	-283	ENSG00000136158	sprouty RTK signaling antagonist 2
chr9	133418016	133418486	471	REXO4	4.38169	9.41924	5.31477	Promoter (<=1kb)	0	ENSG00000148300	REX4 homolog, 3'-5' exonuclease
chr20	63864660	63864980	321	TPD52L2	5.3833	9.40491	5.30153	Promoter (<=1kb)	-248	ENSG00000101150	TPD52 like 2
chrUn_GL000220v1	124927	126506	1580	RNA5-8SN5	1.88841	9.39821	5.29522	Distal Intergenic	12902	ENSG00000274917	RNA, 5.8S ribosomal N5
chr10	42079608	42079943	336	LOC101929373	1.3406	9.39526	5.29228	Distal Intergenic	-162778	NA	uncharacterized LOC101929373
chr8	100951553	100952009	457	YWHAZ	3.22406	9.37792	5.27549	Promoter (<=1kb)	0	ENSG00000164924	tyrosine 3-monooxygenase/tryptophan 5-monooxygenase activation protein zeta
chr1	37514646	37515126	481	MEAF6	5.15518	9.34825	5.24697	Promoter (<=1kb)	0	ENSG00000163875	MYST/Esa1 associated factor 6
chr1	202143716	202144241	526	ARL8A	5.15518	9.34825	5.24697	Promoter (<=1kb)	496	ENSG00000143862	ADP ribosylation factor like GTPase 8A
chr11	65570234	65570676	443	ZNRD2	5.15518	9.34825	5.24697	Promoter (<=1kb)	0	ENSG00000173465	zinc ribbon domain containing 2
chr5	177006492	177007002	511	UIMC1	5.15518	9.34825	5.24697	Promoter (<=1kb)	0	ENSG00000087206	ubiquitin interaction motif containing 1
chrX	3843594	3843864	271	LOC389906	5.15518	9.34825	5.24697	Promoter (<=1kb)	0	ENSG00000285756	zinc finger protein 839 pseudogene
chr4	51717965	51718239	275	DCUN1D4	5.15518	9.34825	5.24697	Distal Intergenic	-124761	ENSG00000109184	defective in cullin neddylation 1 domain containing 4
chr19	25808636	25808914	279	HAVCR1P1	5.34884	9.34554	5.24649	Distal Intergenic	-1645152	ENSG00000268442	hepatitis A virus cellular receptor 1 pseudogene 1
chr19	11639803	11640173	371	ZNF833P	3.60701	9.30961	5.21246	Promoter (<=1kb)	27	NA	zinc finger protein 833, pseudogene
chr15	19399867	19400397	531	FAM30B	3.387	9.30612	5.21003	Distal Intergenic	-612344	NA	family with sequence similarity 30 member B
chr19	25669823	25670112	290	HAVCR1P1	3.387	9.30612	5.21003	Distal Intergenic	-1506339	ENSG00000268442	hepatitis A virus cellular receptor 1 pseudogene 1
chrUn_GL000220v1	113442	113872	431	RNA5-8SN5	2.22044	9.27872	5.18452	Promoter (1-2kb)	1417	ENSG00000274917	RNA, 5.8S ribosomal N5
chr7	56370593	56370899	307	LOC650226	2.03518	9.27367	5.17961	Distal Intergenic	61803	NA	ankyrin repeat domain containing 26 pseudogene
chr21	8259456	8260033	578	MIR6724-2	2.20321	9.24525	5.15194	Distal Intergenic	9951	ENSG00000274060	microRNA 6724-2
chr14	73741516	73741787	272	MIDEAS	5.096	9.2418	5.14894	Promoter (2-3kb)	-2042	ENSG00000156030	mitotic deacetylase associated SANT domain protein
chr9	129803154	129803517	364	TOR1B	5.096	9.2418	5.14894	Promoter (<=1kb)	0	ENSG00000136816	torsin family 1 member B
chr19	16572534	16572836	303	SLC35E1	4.43628	9.23495	5.14239	Promoter (<=1kb)	-119	ENSG00000127526	solute carrier family 35 member E1
chr22_KI270733v1_random	121875	122267	393	RNA5-8SN4	1.98891	9.2258	5.1337	Exon (ENST00000618675.1/ENST00000618675.1, exon 1 of 1)	-6610	ENSG00000276700	RNA, 5.8S ribosomal N4
chr1	32292049	32292411	363	HDAC1	4.04863	9.21454	5.12278	Promoter (<=1kb)	0	ENSG00000116478	histone deacetylase 1
chr1	53220269	53220566	298	CZIB	4.04863	9.21454	5.12278	Promoter (<=1kb)	26	ENSG00000162384	CXXC motif containing zinc binding protein
chr10	14953748	14954413	666	DCLRE1C	4.04863	9.21454	5.12278	Promoter (<=1kb)	0	ENSG00000152457	DNA cross-link repair 1C
chr16	31073404	31073710	307	ZNF668	4.04863	9.21454	5.12278	Promoter (<=1kb)	0	ENSG00000167394	zinc finger protein 668
chr17	81871401	81872026	626	ARHGDIA	4.04863	9.21454	5.12278	Promoter (<=1kb)	-23	ENSG00000141522	Rho GDP dissociation inhibitor alpha
chr2	20822674	20823163	490	LDAH	4.04863	9.21454	5.12278	Promoter (<=1kb)	0	ENSG00000118961	lipid droplet associated hydrolase
chr2	113591714	113591986	273	WASH2P	4.04863	9.21454	5.12278	Promoter (2-3kb)	-2190	ENSG00000146556	WASP family homolog 2, pseudogene
chr22	24555649	24555924	276	GUCD1	4.04863	9.21454	5.12278	Promoter (<=1kb)	0	ENSG00000138867	guanylyl cyclase domain containing 1
chr3	193593093	193593468	376	OPA1	4.89051	9.19686	5.109	Promoter (<=1kb)	0	ENSG00000198836	OPA1 mitochondrial dynamin like GTPase
chr8	134832220	134832605	386	NCRNA00250	4.89051	9.19686	5.109	Distal Intergenic	-5464	ENSG00000253433	non-protein coding RNA 250
chr22_KI270733v1_random	175380	175790	411	RNA5-8SN4	2.32922	9.1922	5.1065	Distal Intergenic	46503	ENSG00000276700	RNA, 5.8S ribosomal N4
chr19	32692336	32692776	441	NUDT19	3.93008	9.18819	5.10293	Promoter (<=1kb)	515	ENSG00000213965	nudix hydrolase 19
chr1	124063249	124063521	273	LINC01691	4.53701	9.13961	5.05644	Distal Intergenic	-2482725	NA	long intergenic non-protein coding RNA 1691
chr19	13164332	13164772	441	IER2	5.03817	9.13734	5.05429	Distal Intergenic	13917	ENSG00000160888	immediate early response 2
chr17	81977306	81978064	759	ASPSCR1	4.01455	9.12944	5.04683	Promoter (<=1kb)	0	ENSG00000169696	ASPSCR1 tether for SLC2A4, UBX domain containing
chr16	28925031	28925506	476	RABEP2	4.67572	9.10577	5.0246	Promoter (<=1kb)	0	ENSG00000177548	rabaptin, RAB GTPase binding effector protein 2
chr17	81891793	81892166	374	ANAPC11	4.67572	9.10577	5.0246	Promoter (<=1kb)	0	ENSG00000141552	anaphase promoting complex subunit 11
chr19	51225863	51226162	300	CD33	4.67572	9.10577	5.0246	Promoter (<=1kb)	0	ENSG00000105383	CD33 molecule
chr2	31234147	31234418	272	EHD3	4.67572	9.10577	5.0246	Promoter (<=1kb)	0	ENSG00000013016	EH domain containing 3
chr22	37244213	37244489	277	RAC2	4.67572	9.10577	5.0246	Promoter (<=1kb)	0	ENSG00000128340	Rac family small GTPase 2
chr7	99617029	99617320	292	ZSCAN25	4.67572	9.10577	5.0246	Promoter (<=1kb)	63	ENSG00000197037	zinc finger and SCAN domain containing 25
chr8	42843065	42843639	575	THAP1	4.67572	9.10577	5.0246	Promoter (<=1kb)	0	ENSG00000131931	THAP domain containing 1
chr3	138915531	138915942	412	LINC01391	4.67572	9.10577	5.0246	Distal Intergenic	26636	ENSG00000244578	long intergenic non-protein coding RNA 1391
chr7	87152189	87152707	519	DMTF1-AS1	4.11058	9.0836	5.00565	Promoter (<=1kb)	0	ENSG00000224046	DMTF1 antisense RNA 1
chrUn_GL000220v1	109296	109937	642	RNA5-8SN5	2.08166	9.08177	5.00445	Promoter (2-3kb)	-2088	ENSG00000274917	RNA, 5.8S ribosomal N5
chr1	43367768	43368416	649	ELOVL1	4.49794	9.05827	4.98145	Promoter (<=1kb)	0	ENSG00000066322	ELOVL fatty acid elongase 1
chr20	4823202	4823474	273	RASSF2	4.49794	9.05827	4.98145	Promoter (<=1kb)	134	ENSG00000101265	Ras association domain family member 2
chr8	65951556	65951994	439	DNAJC5B	4.49794	9.05827	4.98145	Distal Intergenic	-69559	ENSG00000147570	DnaJ heat shock protein family (Hsp40) member C5 beta
chr3	186783053	186783525	473	EIF4A2	4.22073	9.05361	4.97832	Promoter (<=1kb)	0	ENSG00000156976	eukaryotic translation initiation factor 4A2
chr19	39445660	39445969	310	SUPT5H	4.34834	9.04339	4.96941	Promoter (<=1kb)	0	ENSG00000196235	SPT5 homolog, DSIF elongation factor subunit
chr19	26960613	26960888	276	LOC105372345	4.21138	9.03216	4.95947	Distal Intergenic	724367	NA	uncharacterized LOC105372345
chr10	109923076	109923403	328	XPNPEP1	4.21138	9.03216	4.95947	Promoter (<=1kb)	28	ENSG00000108039	X-prolyl aminopeptidase 1
chr12	120194524	120194944	421	GCN1	4.21138	9.03216	4.95947	Promoter (<=1kb)	0	ENSG00000089154	GCN1 activator of EIF2AK4
chr14	76151777	76152192	416	GPATCH2L	4.21138	9.03216	4.95947	Promoter (<=1kb)	0	ENSG00000089916	G-patch domain containing 2 like
chr16	30075618	30076199	582	PPP4C	4.21138	9.03216	4.95947	Promoter (<=1kb)	0	ENSG00000149923	protein phosphatase 4 catalytic subunit
chr19	48725196	48725657	462	RASIP1	4.21138	9.03216	4.95947	Promoter (<=1kb)	0	ENSG00000105538	Ras interacting protein 1
chr8	38381888	38382264	377	NSD3	4.21138	9.03216	4.95947	Promoter (<=1kb)	0	ENSG00000147548	nuclear receptor binding SET domain protein 3
chr8	102806194	102806566	373	GASAL1	4.21138	9.03216	4.95947	Promoter (<=1kb)	-256	NA	growth arrest associated lncRNA 1
chrX	2631013	2631339	327	CD99P1	5.15101	9.00241	4.93691	Intron (ENST00000691003.1/401577, intron 8 of 8)	14394	ENSG00000223773	CD99 molecule pseudogene 1
chr1	37807507	37807908	402	C1orf122	5.14143	8.98569	4.92235	Promoter (<=1kb)	0	ENSG00000197982	chromosome 1 open reading frame 122
chr1	108692373	108692737	365	PRPF38B	5.14143	8.98569	4.92235	Promoter (<=1kb)	32	ENSG00000134186	pre-mRNA processing factor 38B
chr1	183023405	183023687	283	LAMC1	5.14143	8.98569	4.92235	Promoter (<=1kb)	0	ENSG00000135862	laminin subunit gamma 1
chr12	57111546	57111940	395	STAT6	5.14143	8.98569	4.92235	Promoter (<=1kb)	-113	ENSG00000166888	signal transducer and activator of transcription 6
chr17	50127388	50128081	694	SAMD14	5.14143	8.98569	4.92235	Promoter (1-2kb)	1673	ENSG00000167100	sterile alpha motif domain containing 14
chr6	41072024	41072437	414	OARD1	5.14143	8.98569	4.92235	Promoter (<=1kb)	0	ENSG00000124596	O-acyl-ADP-ribose deacylase 1
chr8	26576995	26577268	274	DPYSL2	5.14143	8.98569	4.92235	Promoter (<=1kb)	0	ENSG00000092964	dihydropyrimidinase like 2
chr8	38176308	38176660	353	LSM1	5.14143	8.98569	4.92235	Promoter (<=1kb)	0	ENSG00000175324	LSM1 homolog, mRNA degradation associated
chr9	128882204	128882491	288	KYAT1	5.14143	8.98569	4.92235	Promoter (<=1kb)	3	ENSG00000171097	kynurenine aminotransferase 1
chr1	124763677	124764075	399	LINC01691	1.85088	8.92624	4.87016	Distal Intergenic	-3183153	NA	long intergenic non-protein coding RNA 1691
chr10	40504386	40504669	284	LOC101929373	4.15961	8.91298	4.85731	Distal Intergenic	-1738052	NA	uncharacterized LOC101929373
chr14	91202519	91202895	377	DGLUCY	4.42482	8.90518	4.84973	Intron (ENST00000520328.5/80017, intron 13 of 14)	6126	ENSG00000133943	D-glutamate cyclase
chr2	74120294	74120578	285	TET3	4.42482	8.90518	4.84973	Distal Intergenic	-3387	ENSG00000187605	tet methylcytosine dioxygenase 3
chr1	27914882	27915275	394	RPA2	4.42482	8.90518	4.84973	Promoter (<=1kb)	-136	ENSG00000117748	replication protein A2
chr1	44807548	44808078	531	DYNLT4	4.42482	8.90518	4.84973	Promoter (<=1kb)	-197	ENSG00000188396	dynein light chain Tctex-type 4
chr10	73730250	73730698	449	BMS1P4-AGAP5	4.42482	8.90518	4.84973	Promoter (<=1kb)	0	ENSG00000242288	BMS1P4-AGAP5 readthrough
chr17	1456024	1456359	336	CRK	4.42482	8.90518	4.84973	Promoter (<=1kb)	0	ENSG00000167193	CRK proto-oncogene, adaptor protein
chr17	51260658	51261104	447	UTP18	4.42482	8.90518	4.84973	Promoter (<=1kb)	112	ENSG00000011260	UTP18 small subunit processome component
chr18	12376806	12377141	336	AFG3L2	4.42482	8.90518	4.84973	Promoter (<=1kb)	0	ENSG00000141385	AFG3 like matrix AAA peptidase subunit 2
chr22	21665847	21666155	309	PPIL2	4.42482	8.90518	4.84973	Promoter (<=1kb)	0	ENSG00000100023	peptidylprolyl isomerase like 2
chr8	123042007	123042299	293	DERL1	4.42482	8.90518	4.84973	Promoter (<=1kb)	0	ENSG00000136986	derlin 1
chr9	121370607	121371173	567	LOC102723324	4.42482	8.90518	4.84973	Promoter (<=1kb)	13	NA	uncharacterized LOC102723324
chr1	123403174	123403497	324	LINC01691	4.71703	8.86698	4.81844	Distal Intergenic	-1822650	NA	long intergenic non-protein coding RNA 1691
chr14	17149236	17149562	327	OR11H12	4.71703	8.86698	4.81844	Distal Intergenic	-1451555	ENSG00000257115	olfactory receptor family 11 subfamily H member 12
chr1	231627023	231627472	450	DISC1	4.71703	8.86698	4.81844	Promoter (<=1kb)	186	ENSG00000162946	DISC1 scaffold protein
chr1	248826073	248826638	566	MIR3124	4.71703	8.86698	4.81844	Promoter (<=1kb)	0	ENSG00000264500	microRNA 3124
chr12	112013497	112013928	432	ERP29	4.71703	8.86698	4.81844	Promoter (<=1kb)	17	ENSG00000089248	endoplasmic reticulum protein 29
chr3	148991369	148992152	784	GYG1	4.71703	8.86698	4.81844	Promoter (<=1kb)	0	ENSG00000163754	glycogenin 1
chr4	99949462	99949771	310	H2AZ1	4.71703	8.86698	4.81844	Promoter (<=1kb)	483	ENSG00000164032	H2A.Z variant histone 1
chr6	35342625	35342942	318	PPARD	4.71703	8.86698	4.81844	Promoter (<=1kb)	11	ENSG00000112033	peroxisome proliferator activated receptor delta
chr11	10857471	10857915	445	ZBED5	5.05749	8.83873	4.79642	Promoter (<=1kb)	0	ENSG00000236287	zinc finger BED-type containing 5
chr21	8462291	8463061	771	RNA5-8SN1	1.76816	8.7978	4.75963	Exon (ENST00000652220.1/ENST00000652220.1, exon 1 of 1)	22468	ENSG00000278189	RNA, 5.8S ribosomal N1
chr22	31638085	31638514	430	PISD	5.02706	8.78527	4.74768	Promoter (<=1kb)	0	ENSG00000241878	phosphatidylserine decarboxylase
chr4	183400125	183400414	290	CDKN2AIP	4.36632	8.78183	4.74484	Distal Intergenic	-44221	ENSG00000168564	CDKN2A interacting protein
chr15	50765493	50765806	314	SPPL2A	3.76964	8.76529	4.72865	Promoter (<=1kb)	0	ENSG00000138600	signal peptide peptidase like 2A
chr19	47273278	47273979	702	INAFM1	3.76964	8.76529	4.72865	Promoter (<=1kb)	-906	ENSG00000257704	InaF motif containing 1
chr2	130372155	130372556	402	PTPN18	3.76964	8.76529	4.72865	Promoter (<=1kb)	-52	ENSG00000072135	protein tyrosine phosphatase non-receptor type 18
chr7	150323218	150323521	304	LRRC61	3.76964	8.76529	4.72865	Promoter (<=1kb)	0	ENSG00000127399	leucine rich repeat containing 61
chr5	6632837	6633256	420	NSUN2	3.97457	8.75478	4.72067	Promoter (<=1kb)	0	ENSG00000037474	NOP2/Sun RNA methyltransferase 2
chr13	103062700	103062976	277	SLC10A2	4.81938	8.73807	4.70493	Intron (ENST00000245312.5/6555, intron 1 of 5)	3441	ENSG00000125255	solute carrier family 10 member 2
chr1	123455057	123455600	544	LINC01691	4.64868	8.73564	4.70263	Distal Intergenic	-1874533	NA	long intergenic non-protein coding RNA 1691
chr16	30903695	30904266	572	CTF1	4.64868	8.73564	4.70263	Downstream (<=300bp)	7057	ENSG00000150281	cardiotrophin 1
chr18	35344122	35344409	288	ZNF24	4.64868	8.73564	4.70263	Promoter (<=1kb)	11	ENSG00000172466	zinc finger protein 24
chr3	150546175	150546834	660	SERP1	4.64868	8.73564	4.70263	Promoter (<=1kb)	0	ENSG00000120742	stress associated endoplasmic reticulum protein 1
chr6	79077951	79078520	570	PHIP	4.64868	8.73564	4.70263	Promoter (<=1kb)	0	ENSG00000146247	pleckstrin homology domain interacting protein
chr12	131229963	131230307	345	LINC01257	4.997	8.73235	4.70172	Intron (ENST00000536191.2/116437, intron 3 of 3)	20796	ENSG00000204603	long intergenic non-protein coding RNA 1257
chr7	139109202	139109557	356	ZC3HAV1	4.997	8.73235	4.70172	Promoter (<=1kb)	0	ENSG00000105939	zinc finger CCCH-type containing, antiviral 1
chr14	18103837	18104145	309	OR11H12	3.28116	8.72319	4.6934	Distal Intergenic	-496972	ENSG00000257115	olfactory receptor family 11 subfamily H member 12
chr1	32179724	32180176	453	TXLNA	4.07118	8.7077	4.67884	Promoter (<=1kb)	0	ENSG00000084652	taxilin alpha
chr16	3264001	3264420	420	LINC00921	4.07118	8.7077	4.67884	Promoter (<=1kb)	201	ENSG00000281005	long intergenic non-protein coding RNA 921
chr9	133002748	133003326	579	GFI1B	4.07118	8.7077	4.67884	Distal Intergenic	16069	ENSG00000165702	growth factor independent 1B transcriptional repressor
chr22_KI270733v1_random	131549	131836	288	RNA5-8SN4	2.05047	8.69652	4.66852	Promoter (2-3kb)	2672	ENSG00000276700	RNA, 5.8S ribosomal N4
chr1	2314606	2315218	613	SKI	4.79337	8.69014	4.66258	Exon (ENST00000659232.1/ENST00000659232.1, exon 1 of 4)	10960	ENSG00000157933	SKI proto-oncogene
chr22	14308424	14308733	310	OR11H1	3.48263	8.69032	4.66258	Distal Intergenic	-1219459	ENSG00000130538	olfactory receptor family 11 subfamily H member 1
chr1	15154001	15154408	408	TMEM51	4.46532	8.68384	4.6576	Promoter (<=1kb)	233	ENSG00000171729	transmembrane protein 51
chr16	18381635	18381963	329	MIR6770-3	4.46532	8.68384	4.6576	Promoter (2-3kb)	-2225	ENSG00000275391	microRNA 6770-3
chr17	74748675	74748997	323	SLC9A3R1-AS1	4.46532	8.68384	4.6576	Promoter (<=1kb)	0	NA	SLC9A3R1 antisense RNA 1
chr3	197750167	197750498	332	FYTTD1	4.46532	8.68384	4.6576	Promoter (<=1kb)	0	ENSG00000122068	forty-two-three domain containing 1
chr22_KI270733v1_random	166949	167352	404	RNA5-8SN4	2.0393	8.68299	4.6576	Exon (ENST00000615130.1/ENST00000615130.1, exon 1 of 1)	38072	ENSG00000276700	RNA, 5.8S ribosomal N4
chr3	157160194	157160490	297	CCNL1	4.18252	8.67707	4.65324	Promoter (<=1kb)	0	ENSG00000163660	cyclin L1
chr4	139556352	139557095	744	SETD7	4.18252	8.67707	4.65324	Promoter (<=1kb)	0	ENSG00000145391	SET domain containing 7, histone lysine methyltransferase
chr10	119080554	119080887	334	EIF3A	4.31224	8.66714	4.64447	Promoter (<=1kb)	0	ENSG00000107581	eukaryotic translation initiation factor 3 subunit A
chr18	15665632	15665911	280	LOC644669	5.13663	8.64517	4.62452	Distal Intergenic	-335350	ENSG00000215512	ankyrin repeat domain 30B pseudogene
chr20	32665105	32665387	283	C20orf203	5.13663	8.64517	4.62452	Intron (ENST00000608990.6/284805, intron 1 of 5)	-7743	ENSG00000198547	chromosome 20 open reading frame 203
chr1	3901028	3901327	300	LINC01134	5.13663	8.64517	4.62452	Promoter (<=1kb)	591	ENSG00000236423	long intergenic non-protein coding RNA 1134
chr11	68004053	68004435	383	UNC93B1	5.13663	8.64517	4.62452	Promoter (<=1kb)	0	ENSG00000110057	unc-93 homolog B1, TLR signaling regulator
chr12	14961132	14961602	471	ARHGDIB	5.13663	8.64517	4.62452	Promoter (<=1kb)	0	ENSG00000111348	Rho GDP dissociation inhibitor beta
chr17	5191671	5192430	760	ZNF594-DT	5.13663	8.64517	4.62452	Promoter (<=1kb)	0	ENSG00000261879	ZNF594 divergent transcript
chr17	7018297	7018668	372	MIR497	5.13663	8.64517	4.62452	Promoter (<=1kb)	-275	ENSG00000284027	microRNA 497
chr18	63970347	63970741	395	SERPINB8	5.13663	8.64517	4.62452	Promoter (<=1kb)	0	ENSG00000166401	serpin family B member 8
chr2	111633798	111634116	319	LOC107985933	5.13663	8.64517	4.62452	Promoter (2-3kb)	-2758	NA	uncharacterized LOC107985933
chr2	191013949	191014545	597	STAT1	5.13663	8.64517	4.62452	Promoter (<=1kb)	0	ENSG00000115415	signal transducer and activator of transcription 1
chr5	176536373	176536889	517	RNF44	5.13663	8.64517	4.62452	Promoter (<=1kb)	-43	ENSG00000146083	ring finger protein 44
chr6	146770668	146770975	308	ADGB	5.13663	8.64517	4.62452	Promoter (<=1kb)	223	ENSG00000118492	androglobin
chr8	22704894	22705423	530	LOC107986926	5.13663	8.64517	4.62452	Promoter (1-2kb)	-1118	NA	uncharacterized LOC107986926
chrX	52897036	52897476	441	FAM156B	5.13663	8.64517	4.62452	Promoter (<=1kb)	0	ENSG00000179304	family with sequence similarity 156 member B
chrX	154397659	154398044	386	RPL10	5.13663	8.64517	4.62452	Promoter (<=1kb)	0	ENSG00000147403	ribosomal protein L10
chr8	22715563	22716081	519	LOC107986926	5.13663	8.64517	4.62452	Intron (ENST00000523627.1/107986925, intron 1 of 4)	-11787	NA	uncharacterized LOC107986926
chr11	102109955	102110291	337	YAP1	5.11272	8.60451	4.5961	Promoter (<=1kb)	-156	ENSG00000137693	Yes1 associated transcriptional regulator
chr19	34428237	34428595	359	UBA2	3.87993	8.52267	4.51715	Promoter (<=1kb)	0	ENSG00000126261	ubiquitin like modifier activating enzyme 2
chr8	47961018	47961321	304	MCM4	3.87993	8.52267	4.51715	Promoter (<=1kb)	0	ENSG00000104738	minichromosome maintenance complex component 4
chr8	97644263	97644946	684	MTDH	3.87993	8.52267	4.51715	Promoter (<=1kb)	0	ENSG00000147649	metadherin
chr8	123416703	123417003	301	NTAQ1	3.87993	8.52267	4.51715	Promoter (<=1kb)	0	ENSG00000156795	N-terminal glutamine amidase 1
chr9	128191673	128192006	334	DNM1	3.87993	8.52267	4.51715	Promoter (<=1kb)	0	ENSG00000106976	dynamin 1
chr2	26768865	26769221	357	SLC35F6	4.85193	8.47543	4.47638	Intron (ENST00000429494.5/54978, intron 1 of 4)	4540	ENSG00000213699	solute carrier family 35 member F6
chr10	99430970	99431258	289	GOT1-DT	4.85193	8.47543	4.47638	Promoter (<=1kb)	0	NA	GOT1 divergent transcript
chr11	65961741	65962034	294	SART1	4.85193	8.47543	4.47638	Promoter (<=1kb)	7	ENSG00000175467	spliceosome associated factor 1, recruiter of U4/U6.U5 tri-snRNP
chr15	82750618	82750923	306	SNHG21	4.85193	8.47543	4.47638	Promoter (<=1kb)	34	ENSG00000250988	small nucleolar RNA host gene 21
chr8	144755406	144755857	452	ZNF251	4.85193	8.47543	4.47638	Promoter (<=1kb)	0	ENSG00000198169	zinc finger protein 251
chr8	64834367	64834786	420	LOC105375878	4.66737	8.4566	4.46048	Intron (ENST00000665380.1/105375879, intron 2 of 2)	-16794	NA	uncharacterized LOC105375878
chr1	149850426	149850815	390	H2BC20P	3.3166	8.40179	4.40907	Promoter (<=1kb)	0	ENSG00000261716	H2B clustered histone 20, pseudogene
chr9	133375800	133376110	311	SURF4	3.54421	8.39547	4.40338	Promoter (<=1kb)	0	ENSG00000148248	surfeit 4
chr9	136646282	136646592	311	EGFL7	3.54421	8.39547	4.40338	Distal Intergenic	-12264	ENSG00000172889	EGF like domain multiple 7
chr10	17425422	17425919	498	ST8SIA6	4.98265	8.38242	4.39197	Intron (ENST00000657045.1/105376436, intron 3 of 6)	28277	ENSG00000148488	ST8 alpha-N-acetyl-neuraminide alpha-2,8-sialyltransferase 6
chr21	8465424	8466349	926	RNA5-8SN1	1.81723	8.37219	4.38312	Exon (ENST00000651130.1/ENST00000651130.1, exon 1 of 1)	25601	ENSG00000278189	RNA, 5.8S ribosomal N1
chr1	123334549	123334857	309	LINC01691	2.71887	8.37184	4.38279	Distal Intergenic	-1754025	NA	long intergenic non-protein coding RNA 1691
chr1	212286134	212286423	290	PPP2R5A	4.61881	8.36594	4.37735	Promoter (<=1kb)	724	ENSG00000066027	protein phosphatase 2 regulatory subunit B'alpha
chr12	1661992	1662284	293	MIR3649	4.61881	8.36594	4.37735	Promoter (1-2kb)	-1612	ENSG00000266043	microRNA 3649
chr2	101252950	101253419	470	CNOT11	4.61881	8.36594	4.37735	Promoter (<=1kb)	64	ENSG00000158435	CCR4-NOT transcription complex subunit 11
chr9	114372161	114372481	321	AKNA	4.61881	8.36594	4.37735	Intron (ENST00000374088.8/80709, intron 4 of 21)	4483	ENSG00000106948	AT-hook transcription factor
chr3	170037987	170038292	306	GPR160	4.95116	8.32841	4.34303	Promoter (<=1kb)	0	ENSG00000173890	G protein-coupled receptor 160
chr17	78263399	78263939	541	LINC01993	4.01995	8.31113	4.32739	Exon (ENST00000374945.1/100996291, exon 6 of 7)	14553	ENSG00000204277	long intergenic non-protein coding RNA 1993
chr1	223845399	223845717	319	TP53BP2	4.01995	8.31113	4.32739	Promoter (<=1kb)	77	ENSG00000143514	tumor protein p53 binding protein 2
chr11	236993	237347	355	PSMD13	4.01995	8.31113	4.32739	Promoter (<=1kb)	0	ENSG00000185627	proteasome 26S subunit, non-ATPase 13
chr11	9572951	9573359	409	WEE1	4.01995	8.31113	4.32739	Promoter (<=1kb)	-311	ENSG00000166483	WEE1 G2 checkpoint kinase
chr11	64844568	64844878	311	CDC42BPG	4.01995	8.31113	4.32739	Promoter (<=1kb)	0	ENSG00000171219	CDC42 binding protein kinase gamma
chr11	65712059	65712430	372	KAT5	4.01995	8.31113	4.32739	Promoter (<=1kb)	0	ENSG00000172977	lysine acetyltransferase 5
chr15	68277886	68278246	361	FEM1B	4.01995	8.31113	4.32739	Promoter (<=1kb)	141	ENSG00000169018	fem-1 homolog B
chr15	78131564	78131854	291	CIB2	4.01995	8.31113	4.32739	Promoter (<=1kb)	-29	ENSG00000136425	calcium and integrin binding family member 2
chr16	31458603	31458930	328	ARMC5	4.01995	8.31113	4.32739	Promoter (<=1kb)	0	ENSG00000140691	armadillo repeat containing 5
chr19	18571691	18572063	373	UBA52	4.01995	8.31113	4.32739	Promoter (<=1kb)	0	ENSG00000221983	ubiquitin A-52 residue ribosomal protein fusion product 1
chr2	200812058	200812554	497	BZW1-AS1	4.01995	8.31113	4.32739	Promoter (<=1kb)	0	ENSG00000230408	BZW1 antisense RNA 1
chr6	110179566	110179910	345	WASF1	4.01995	8.31113	4.32739	Promoter (<=1kb)	0	ENSG00000112290	WASP family member 1
chr2	24359928	24360722	795	ITSN2	4.42963	8.3092	4.32739	Promoter (<=1kb)	0	ENSG00000198399	intersectin 2
chr20	62386818	62387452	635	RPS21	4.42963	8.3092	4.32739	Promoter (<=1kb)	0	ENSG00000171858	ribosomal protein S21
chr8_KI270816v1_alt	161293	161733	441	ZNF707	4.42963	8.3092	4.32739	Promoter (<=1kb)	0	ENSG00000181135	zinc finger protein 707
chr22	46035940	46036327	388	LINC00899	4.01995	8.31113	4.32739	Distal Intergenic	8283	NA	long intergenic non-protein coding RNA 899
chr22_KI270733v1_random	161066	161615	550	RNA5-8SN4	1.88331	8.31062	4.32739	Distal Intergenic	32189	ENSG00000276700	RNA, 5.8S ribosomal N4
chr3	186806297	186806740	444	RFC4	4.27304	8.29046	4.31486	Promoter (<=1kb)	0	ENSG00000163918	replication factor C subunit 4
chr19	25135588	25135896	309	HAVCR1P1	3.03983	8.2804	4.30639	Distal Intergenic	-972104	ENSG00000268442	hepatitis A virus cellular receptor 1 pseudogene 1
chr13	109787002	109787641	640	IRS2	3.03983	8.2804	4.30639	Promoter (<=1kb)	-419	ENSG00000185950	insulin receptor substrate 2
chr19	39335728	39336822	1095	GMFG	3.03983	8.2804	4.30639	Promoter (<=1kb)	0	ENSG00000130755	glia maturation factor gamma
chr10	101817799	101818345	547	OGA	4.71505	8.23056	4.25889	Promoter (<=1kb)	0	ENSG00000198408	O-GlcNAcase
chr5	48370041	48370361	321	EMB	2.44905	8.16676	4.19777	Distal Intergenic	2041637	ENSG00000170571	embigin
chr12	31170	31540	371	WASH8P	3.17531	8.15372	4.18534	Promoter (<=1kb)	475	ENSG00000226210	WAS protein family homolog 8, pseudogene
chr1	124727292	124727627	336	LINC01691	2.08287	8.14	4.1787	Distal Intergenic	-3146768	NA	long intergenic non-protein coding RNA 1691
chr11	8688858	8689138	281	SNORA3B	4.20358	8.14642	4.1787	3' UTR	3419	ENSG00000212607	small nucleolar RNA, H/ACA box 3B
chr15	75153510	75154027	518	C15orf39	4.50172	8.14577	4.1787	Distal Intergenic	-41616	ENSG00000167173	chromosome 15 open reading frame 39
chr1	109548414	109548830	417	GNAI3	4.20358	8.14642	4.1787	Promoter (<=1kb)	0	ENSG00000065135	G protein subunit alpha i3
chr1	155135506	155135825	320	SLC50A1	4.20358	8.14642	4.1787	Promoter (<=1kb)	0	ENSG00000169241	solute carrier family 50 member 1
chr11	62880947	62881327	381	SLC3A2	4.20358	8.14642	4.1787	Promoter (<=1kb)	51	ENSG00000168003	solute carrier family 3 member 2
chr11	64269216	64269677	462	GPR137	4.20358	8.14642	4.1787	Promoter (<=1kb)	-385	ENSG00000173264	G protein-coupled receptor 137
chr12	6493326	6493703	378	NCAPD2	4.20358	8.14642	4.1787	Promoter (<=1kb)	0	ENSG00000010292	non-SMC condensin I complex subunit D2
chr12	9647893	9648167	275	LOC105369728	4.20358	8.14642	4.1787	Promoter (<=1kb)	0	ENSG00000256442	uncharacterized LOC105369728
chr2	36966227	36966508	282	STRN	4.20358	8.14642	4.1787	Promoter (<=1kb)	0	ENSG00000115808	striatin
chr2	61471112	61471589	478	USP34-DT	4.20358	8.14642	4.1787	Promoter (<=1kb)	0	NA	USP34 divergent transcript
chr2	218399295	218399641	347	CTDSP1	4.20358	8.14642	4.1787	Promoter (<=1kb)	-227	ENSG00000144579	CTD small phosphatase 1
chr6	42048413	42048982	570	CCND3	4.20358	8.14642	4.1787	Promoter (<=1kb)	0	ENSG00000112576	cyclin D3
chr8	134712818	134713507	690	ZFAT	4.20358	8.14642	4.1787	Promoter (<=1kb)	0	ENSG00000066827	zinc finger and AT-hook domain containing
chr9	26892472	26892751	280	CAAP1	4.20358	8.14642	4.1787	Promoter (<=1kb)	0	ENSG00000120159	caspase activity and apoptosis inhibitor 1
chr8	44944302	44944611	310	POTEA	4.20358	8.14642	4.1787	Distal Intergenic	1651819	ENSG00000188877	POTE ankyrin domain family member A
chr4	173021912	173022344	433	GALNT7-DT	4.66243	8.13578	4.17492	Intron (ENST00000506823.6/442117, intron 12 of 12)	143815	ENSG00000245213	GALNT7 divergent transcript
chr1	203795731	203796013	283	ZC3H11A	4.82908	8.11803	4.1579	Promoter (<=1kb)	25	ENSG00000058673	zinc finger CCCH-type containing 11A
chr3	40524895	40525187	293	ZNF621	4.82908	8.11803	4.1579	Promoter (<=1kb)	0	ENSG00000172888	zinc finger protein 621
chr3	146544376	146544710	335	PLSCR1	4.82908	8.11803	4.1579	Promoter (<=1kb)	0	ENSG00000188313	phospholipid scramblase 1
chr13	17265057	17265350	294	FAM230C	3.61886	8.11335	4.15461	Distal Intergenic	-929947	ENSG00000279516	family with sequence similarity 230 member C
chr17	76726036	76726533	498	JMJD6	3.61886	8.11335	4.15461	Promoter (<=1kb)	0	ENSG00000070495	jumonji domain containing 6, arginine demethylase and lysine hydroxylase
chr19	58559203	58559906	704	MZF1-AS1	3.61886	8.11335	4.15461	Promoter (<=1kb)	0	ENSG00000267858	MZF1 antisense RNA 1
chr1	226062858	226063168	311	H3-3A	4.8201	8.10249	4.14636	Promoter (<=1kb)	75	ENSG00000163041	H3.3 histone A
chr11	118359366	118360053	688	UBE4A	4.8201	8.10249	4.14636	Promoter (<=1kb)	0	ENSG00000110344	ubiquitination factor E4A
chr6	15245548	15245889	342	JARID2	4.8201	8.10249	4.14636	Promoter (<=1kb)	-180	ENSG00000008083	jumonji and AT-rich interaction domain containing 2
chr9	44239332	44239642	311	LOC102724904	4.8201	8.10249	4.14636	Distal Intergenic	1110364	ENSG00000286506	methylenetetrahydrofolate dehydrogenase (NADP+ dependent) 1 like pseudogene
chr19	4089311	4089654	344	MAP2K2	4.04505	8.09036	4.14093	Distal Intergenic	7534	ENSG00000126934	mitogen-activated protein kinase kinase 2
chr4	2798135	2798603	469	SH3BP2	4.63656	8.08903	4.13968	Promoter (<=1kb)	0	ENSG00000087266	SH3 domain binding protein 2
chr19	13847129	13847702	574	MIR23AHG	3.35825	8.08591	4.1366	Distal Intergenic	-4201	NA	miR-23a/27a/24-2 cluster host gene
chr4	183444060	183444972	913	CDKN2AIP	3.80177	8.06853	4.12066	Promoter (<=1kb)	0	ENSG00000168564	CDKN2A interacting protein
chr12	124520824	124521281	458	NCOR2	4.79949	8.0668	4.1196	Promoter (2-3kb)	-2530	ENSG00000196498	nuclear receptor corepressor 2
chr15	75625450	75625767	318	SNUPN	4.79949	8.0668	4.1196	Promoter (<=1kb)	0	ENSG00000169371	snurportin 1
chr1	93180737	93181130	394	CCDC18	4.45497	8.05724	4.11074	Promoter (<=1kb)	0	ENSG00000122483	coiled-coil domain containing 18
chr10	43574127	43574611	485	ZNF239	4.45497	8.05724	4.11074	Promoter (<=1kb)	0	ENSG00000196793	zinc finger protein 239
chr11	124622867	124623439	573	TBRG1	4.45497	8.05724	4.11074	Promoter (<=1kb)	0	ENSG00000154144	transforming growth factor beta regulator 1
chr16	87780393	87780917	525	LOC102724467	4.45497	8.05724	4.11074	Promoter (1-2kb)	-1019	NA	uncharacterized LOC102724467
chr19	17377080	17377591	512	PLVAP	4.45497	8.05724	4.11074	Promoter (<=1kb)	0	ENSG00000130300	plasmalemma vesicle associated protein
chr22	24155959	24156246	288	CABIN1	4.45497	8.05724	4.11074	Promoter (<=1kb)	121	ENSG00000099991	calcineurin binding protein 1
chr5_GL339449v2_alt	846648	846957	310	GUSBP16	4.45497	8.05724	4.11074	Promoter (<=1kb)	-268	NA	GUSB pseudogene 16
chr7	32495559	32495870	312	AVL9	4.45497	8.05724	4.11074	Promoter (<=1kb)	33	ENSG00000105778	AVL9 cell migration associated
chr9	132354650	132355294	645	SETX	4.45497	8.05724	4.11074	Promoter (<=1kb)	0	ENSG00000107290	senataxin
chr8	125505931	125506202	272	LINC02964	4.45497	8.05724	4.11074	Intron (ENST00000522815.1/ENST00000522815.1, intron 2 of 3)	19251	NA	long intergenic non-protein coding RNA 2964
chr21	8254520	8255077	558	MIR6724-2	2.21831	8.04821	4.10818	Exon (ENST00000629969.1/ENST00000629969.1, exon 1 of 1)	5015	ENSG00000274060	microRNA 6724-2
chr22_KI270733v1_random	127378	127730	353	RNA5-8SN4	1.98895	8.03793	4.09842	Promoter (1-2kb)	-1147	ENSG00000276700	RNA, 5.8S ribosomal N4
chr19	41351139	41351409	271	TMEM91	3.89994	8.03645	4.09705	Promoter (<=1kb)	228	ENSG00000142046	transmembrane protein 91
chr19	19406072	19406607	536	GATAD2A	4.28819	8.02909	4.09002	Promoter (<=1kb)	234	ENSG00000167491	GATA zinc finger domain containing 2A
chr11	128694939	128695304	366	SENCR	4.77027	8.0161	4.07809	Promoter (<=1kb)	684	ENSG00000254703	smooth muscle and endothelial cell enriched migration/differentiation-associated lncRNA
chr2	177212810	177213100	291	HNRNPA3	3.88612	8.00457	4.06753	Promoter (<=1kb)	16	ENSG00000170144	heterogeneous nuclear ribonucleoprotein A3
chr2	207625437	207625911	475	METTL21A	3.88612	8.00457	4.06753	Promoter (<=1kb)	16	ENSG00000144401	methyltransferase 21A, HSPA lysine
chr14	74712741	74713039	299	AREL1	4.58567	7.99681	4.06077	Promoter (<=1kb)	0	ENSG00000119682	apoptosis resistant E3 ubiquitin protein ligase 1
chr20	2840358	2840716	359	VPS16	4.58567	7.99681	4.06077	Promoter (<=1kb)	0	ENSG00000215305	VPS16 core subunit of CORVET and HOPS complexes
chr9	3526552	3526950	399	RFX3-DT	3.11973	7.96662	4.0334	Promoter (<=1kb)	17	ENSG00000232104	RFX3 divergent transcript
chr11	123062687	123063243	557	HSPA8	4.74139	7.96592	4.03272	Promoter (<=1kb)	0	ENSG00000109971	heat shock protein family A (Hsp70) member 8
chr2	64609525	64609812	288	LINC02579	4.74139	7.96592	4.03272	Promoter (2-3kb)	2190	ENSG00000233694	long intergenic non-protein coding RNA 2579
chr22	24423972	24424284	313	ADORA2A	4.24943	7.95163	4.02044	Promoter (<=1kb)	-114	ENSG00000128271	adenosine A2a receptor
chrUn_GL000220v1	143507	144393	887	RNA5-8SN5	1.7398	7.93996	4.00929	Distal Intergenic	31482	ENSG00000274917	RNA, 5.8S ribosomal N5
chr2	134707021	134707315	295	LOC105373629	4.39042	7.93438	4.00446	Intron (ENST00000281924.6/81615, intron 2 of 7)	-10873	NA	uncharacterized LOC105373629
chr10	45972063	45972680	618	TIMM23	4.39042	7.93438	4.00446	Promoter (<=1kb)	0	ENSG00000265354	translocase of inner mitochondrial membrane 23
chr10	87094180	87094567	388	GLUD1	4.39042	7.93438	4.00446	Promoter (<=1kb)	0	ENSG00000148672	glutamate dehydrogenase 1
chr4	140095574	140095971	398	LOC101927516	4.39042	7.93438	4.00446	Intron (ENST00000509479.6/55534, intron 1 of 4)	-32044	NA	uncharacterized LOC101927516
chr4	2469142	2469849	708	RNF4	4.09663	7.92253	3.99556	Promoter (<=1kb)	0	ENSG00000063978	ring finger protein 4
chr4	6909234	6909668	435	TBC1D14	4.09663	7.92253	3.99556	Promoter (<=1kb)	0	ENSG00000132405	TBC1 domain family member 14
chr3	193912246	193912585	340	LINC02038	4.71287	7.91625	3.99089	Distal Intergenic	-68222	NA	long intergenic non-protein coding RNA 2038
chr1	205631130	205631668	539	ELK4	4.68469	7.86708	3.94562	Promoter (<=1kb)	225	ENSG00000158711	ETS transcription factor ELK4
chr19	34733947	34734389	443	ZNF181	3.71124	7.84888	3.92858	Promoter (<=1kb)	0	ENSG00000197841	zinc finger protein 181
chr2	207529287	207529667	381	CREB1	3.71124	7.84888	3.92858	Promoter (<=1kb)	-70	ENSG00000118260	cAMP responsive element binding protein 1
chr3	5187941	5188311	371	EDEM1	3.71124	7.84888	3.92858	Promoter (<=1kb)	-38	ENSG00000134109	ER degradation enhancing alpha-mannosidase like protein 1
chr21	8426206	8426543	338	MIR6724-4	1.70313	7.83335	3.91675	Intron (ENST00000651813.1/107987294, intron 2 of 6)	-5987	ENSG00000275692	microRNA 6724-4
chr16	721203	721490	288	ANTKMT	3.20223	7.82331	3.90695	Promoter (<=1kb)	0	ENSG00000103254	adenine nucleotide translocase lysine methyltransferase
chr10	102120309	102120844	536	LDB1	4.65684	7.81841	3.90321	Promoter (<=1kb)	0	ENSG00000198728	LIM domain binding 1
chr9	131393534	131393834	301	PRRC2B	4.65684	7.81841	3.90321	Promoter (<=1kb)	-219	ENSG00000288701	proline rich coiled-coil 2B
chr19	55216364	55216995	632	PTPRH	4.17396	7.79995	3.88574	Exon (ENST00000585911.1/ENST00000585911.1, exon 1 of 2)	-6858	ENSG00000080031	protein tyrosine phosphatase receptor type H
chr22_KI270733v1_random	164252	164663	412	RNA5-8SN4	1.80643	7.78584	3.8727	Distal Intergenic	35375	ENSG00000276700	RNA, 5.8S ribosomal N4
chr1	67053979	67054280	302	SLC35D1	3.40789	7.77735	3.86429	Promoter (<=1kb)	0	ENSG00000116704	solute carrier family 35 member D1
chr1	172443821	172444095	275	LOC102724528	3.40789	7.77735	3.86429	Promoter (<=1kb)	0	NA	uncharacterized LOC102724528
chr2	27409292	27409608	317	PPM1G	3.40789	7.77735	3.86429	Promoter (<=1kb)	0	ENSG00000115241	protein phosphatase, Mg2+/Mn2+ dependent 1G
chr6	38702772	38703046	275	GLO1	4.46321	7.77333	3.86168	Promoter (<=1kb)	99	ENSG00000124767	glyoxalase I
chr2	195657513	195657820	308	SLC39A10	3.68	7.77248	3.86103	Promoter (<=1kb)	64	ENSG00000196950	solute carrier family 39 member 10
chr19	56314236	56314902	667	ZSCAN5A-AS1	4.15551	7.76269	3.85224	Promoter (<=1kb)	0	NA	ZSCAN5A antisense RNA 1
chr14	90500946	90501353	408	LINC00642	4.79419	7.74856	3.83905	Distal Intergenic	43671	ENSG00000233208	long intergenic non-protein coding RNA 642
chr11	18394082	18394361	280	LDHA	4.79419	7.74856	3.83905	Promoter (<=1kb)	-199	ENSG00000134333	lactate dehydrogenase A
chr11	47269770	47270133	364	MADD	4.79419	7.74856	3.83905	Promoter (<=1kb)	-15	ENSG00000110514	MAP kinase activating death domain
chr11	113314604	113314954	351	TTC12	4.79419	7.74856	3.83905	Promoter (<=1kb)	0	ENSG00000149292	tetratricopeptide repeat domain 12
chr12	123107210	123107518	309	PITPNM2	4.79419	7.74856	3.83905	Promoter (1-2kb)	-1711	ENSG00000090975	phosphatidylinositol transfer protein membrane associated 2
chr14	22556608	22556881	274	LOC105370399	4.79419	7.74856	3.83905	Promoter (<=1kb)	0	NA	uncharacterized LOC105370399
chr14	90060590	90061024	435	KCNK13	4.79419	7.74856	3.83905	Promoter (<=1kb)	-970	ENSG00000152315	potassium two pore domain channel subfamily K member 13
chr16	25066500	25067135	636	LINC02175	4.79419	7.74856	3.83905	Promoter (<=1kb)	0	ENSG00000262155	long intergenic non-protein coding RNA 2175
chr2	161160522	161160818	297	TANK	4.79419	7.74856	3.83905	Promoter (<=1kb)	0	ENSG00000136560	TRAF family member associated NFKB activator
chr2	170816732	170817135	404	GAD1	4.79419	7.74856	3.83905	Promoter (<=1kb)	0	ENSG00000128683	glutamate decarboxylase 1
chr20	5610932	5611541	610	GPCPD1	4.79419	7.74856	3.83905	Promoter (<=1kb)	0	ENSG00000125772	glycerophosphocholine phosphodiesterase 1
chr3	3179301	3179658	358	CRBN	4.79419	7.74856	3.83905	Promoter (<=1kb)	16	ENSG00000113851	cereblon
chr4	6278601	6278987	387	WFS1	4.79419	7.74856	3.83905	Promoter (<=1kb)	944	ENSG00000109501	wolframin ER transmembrane glycoprotein
chr5	96934784	96935121	338	ERAP1	4.79419	7.74856	3.83905	Promoter (<=1kb)	0	ENSG00000164307	endoplasmic reticulum aminopeptidase 1
chr5	110739064	110739348	285	SLC25A46	4.79419	7.74856	3.83905	Promoter (<=1kb)	23	ENSG00000164209	solute carrier family 25 member 46
chr5	128082879	128083192	314	SLC12A2-DT	4.79419	7.74856	3.83905	Promoter (<=1kb)	0	ENSG00000245937	SLC12A2 divergent transcript
chr6	33299070	33299345	276	RGL2	4.79419	7.74856	3.83905	Promoter (<=1kb)	-128	ENSG00000237441	ral guanine nucleotide dissociation stimulator like 2
chr9	14322460	14322895	436	NFIB	4.79419	7.74856	3.83905	Promoter (<=1kb)	-122	ENSG00000147862	nuclear factor I B
chr9	26946941	26947488	548	IFT74	4.79419	7.74856	3.83905	Promoter (<=1kb)	0	ENSG00000096872	intraflagellar transport 74
chrX	41332798	41333105	308	DDX3X	4.79419	7.74856	3.83905	Promoter (<=1kb)	-243	ENSG00000215301	DEAD-box helicase 3 X-linked
chr21	38805974	38806467	494	ETS2	3.66826	7.74367	3.83905	Promoter (<=1kb)	0	ENSG00000157557	ETS proto-oncogene 2, transcription factor
chrX	154342474	154343172	699	FLNA	4.79419	7.74856	3.83905	Distal Intergenic	7183	ENSG00000196924	filamin A
chr6	108559870	108560632	763	FOXO3	4.28448	7.73117	3.8346	Promoter (<=1kb)	35	ENSG00000118689	forkhead box O3
chrUn_GL000220v1	150278	150815	538	RNA5-8SN5	1.9278	7.70873	3.81386	Distal Intergenic	38253	ENSG00000274917	RNA, 5.8S ribosomal N5
chr14	50396797	50397104	308	CDKL1	4.74093	7.65874	3.76646	Promoter (<=1kb)	0	ENSG00000100490	cyclin dependent kinase like 1
chr1	28737023	28737311	289	YTHDF2	4.54869	7.62845	3.7377	Promoter (<=1kb)	58	ENSG00000198492	YTH N6-methyladenosine RNA binding protein 2
chr14	76956412	76956723	312	LINC01629	4.54869	7.62845	3.7377	Promoter (2-3kb)	-2913	ENSG00000258602	long intergenic non-protein coding RNA 1629
chr10	40682095	40682421	327	LOC101929373	3.82853	7.60986	3.72319	Distal Intergenic	-1560300	NA	uncharacterized LOC101929373
chr1	166839101	166839399	299	POGK	3.82853	7.60986	3.72319	Promoter (<=1kb)	-48	ENSG00000143157	pogo transposable element derived with KRAB domain
chr1	169105783	169106158	376	ATP1B1	3.82853	7.60986	3.72319	Promoter (<=1kb)	86	ENSG00000143153	ATPase Na+/K+ transporting subunit beta 1
chr19	35716733	35717462	730	KMT2B	3.82853	7.60986	3.72319	Promoter (<=1kb)	-511	ENSG00000272333	lysine methyltransferase 2B
chr3	50227364	50227770	407	MIR5787	3.82853	7.60986	3.72319	Promoter (<=1kb)	0	ENSG00000275334	microRNA 5787
chr3	196942107	196942385	279	NCBP2	3.82853	7.60986	3.72319	Promoter (<=1kb)	0	ENSG00000114503	nuclear cap binding protein subunit 2
chr10	42754189	42754603	415	LOC283028	3.93421	7.57745	3.69874	Promoter (<=1kb)	0	NA	uncharacterized LOC283028
chr10	22340430	22340848	419	SPAG6	4.34712	7.55937	3.68193	Exon (ENST00000607385.1/ENST00000607385.1, exon 1 of 1)	-4597	ENSG00000077327	sperm associated antigen 6
chr12	56630016	56630600	585	BAZ2A	4.34712	7.55937	3.68193	Promoter (<=1kb)	0	ENSG00000076108	bromodomain adjacent to zinc finger domain 2A
chr3	101849735	101850289	555	NFKBIZ	4.34712	7.55937	3.68193	Promoter (<=1kb)	0	ENSG00000144802	NFKB inhibitor zeta
chr19	41264197	41264790	594	HNRNPUL1	3.00025	7.55911	3.68193	Promoter (<=1kb)	0	ENSG00000105323	heterogeneous nuclear ribonucleoprotein U like 1
chr1	50960013	50960314	302	FAF1	4.68024	7.55606	3.68047	Promoter (<=1kb)	0	ENSG00000185104	Fas associated factor 1
chr18	74597300	74597574	275	ZNF407-AS1	4.04814	7.54445	3.66968	Promoter (<=1kb)	0	ENSG00000264247	ZNF407 antisense RNA 1
chr1	121765608	121765937	330	LINC01691	2.45868	7.53886	3.66524	Distal Intergenic	-185084	NA	long intergenic non-protein coding RNA 1691
chr11	69449650	69450276	627	LINC02953	4.18354	7.53564	3.66239	Distal Intergenic	23972	ENSG00000255980	long intergenic non-protein coding RNA 2953
chr12	63780043	63780362	320	RXYLT1	4.18354	7.53564	3.66239	Promoter (<=1kb)	0	ENSG00000118600	ribitol xylosyltransferase 1
chr15	74540591	74540878	288	ARID3B	4.18354	7.53564	3.66239	Promoter (<=1kb)	-328	ENSG00000179361	AT-rich interaction domain 3B
chr3	65549396	65549795	400	MAGI1	4.18354	7.53564	3.66239	Promoter (<=1kb)	0	ENSG00000151276	membrane associated guanylate kinase, WW and PDZ domain containing 1
chr19	16889881	16890232	352	F2RL3	3.7952	7.53481	3.66239	Promoter (<=1kb)	691	ENSG00000127533	F2R like thrombin or trypsin receptor 3
chr8	102590548	102590876	329	ODF1	4.18354	7.53564	3.66239	Distal Intergenic	38959	ENSG00000155087	outer dense fiber of sperm tails 1
chr10	97400973	97401310	338	RRP12	4.65047	7.50556	3.63557	Promoter (<=1kb)	0	ENSG00000052749	ribosomal RNA processing 12 homolog
chr12	112418819	112419498	680	PTPN11	3.23387	7.4969	3.62738	Promoter (<=1kb)	0	ENSG00000179295	protein tyrosine phosphatase non-receptor type 11
chr19	54020554	54020842	289	CACNG6	4.47081	7.49075	3.62202	Distal Intergenic	27676	ENSG00000130433	calcium voltage-gated channel auxiliary subunit gamma 6
chr15	77420878	77421465	588	HMG20A	3.46807	7.4787	3.61098	Promoter (<=1kb)	0	ENSG00000140382	high mobility group 20A
chr18	21612345	21612713	369	SNRPD1	3.46807	7.4787	3.61098	Promoter (<=1kb)	14	ENSG00000167088	small nuclear ribonucleoprotein D1 polypeptide
chr19	34963662	34964324	663	ZNF792	3.46807	7.4787	3.61098	Promoter (<=1kb)	0	ENSG00000180884	zinc finger protein 792
chr3	191329379	191329666	288	CCDC50	3.46807	7.4787	3.61098	Promoter (<=1kb)	0	ENSG00000152492	coiled-coil domain containing 50
chr9	122370782	122371231	450	PTGS1	4.44544	7.44572	3.58128	Promoter (<=1kb)	0	ENSG00000095303	prostaglandin-endoperoxide synthase 1
chr19	10602934	10603231	298	SLC44A2	3.36744	7.43914	3.57537	Promoter (<=1kb)	424	ENSG00000129353	solute carrier family 44 member 2
chr19	10270585	10271017	433	ICAM1	2.77238	7.43854	3.57489	Promoter (<=1kb)	-76	ENSG00000090339	intercellular adhesion molecule 1
chr22_KI270733v1_random	138409	138681	273	RNA5-8SN4	1.97813	7.43446	3.57137	Distal Intergenic	9532	ENSG00000276700	RNA, 5.8S ribosomal N4
chr1	25765612	25765945	334	MAN1C1	4.59206	7.40621	3.54757	Intron (ENST00000374332.9/57134, intron 7 of 11)	-6124	ENSG00000117643	mannosidase alpha class 1C member 1
chr12	124453765	124454189	425	NCOR2	3.98234	7.40946	3.54757	Intron (ENST00000404621.5/9612, intron 7 of 46)	-23124	ENSG00000196498	nuclear receptor corepressor 2
chr18	26090435	26090824	390	SS18	3.98234	7.40946	3.54757	Promoter (<=1kb)	0	ENSG00000141380	SS18 subunit of BAF chromatin remodeling complex
chr19	37251849	37252158	310	LINC01535	3.98234	7.40946	3.54757	Promoter (<=1kb)	0	ENSG00000226686	long intergenic non-protein coding RNA 1535
chr9	127802965	127803259	295	FPGS	3.98234	7.40946	3.54757	Promoter (<=1kb)	0	ENSG00000136877	folylpolyglutamate synthase
chr5	49312164	49312434	271	EMB	3.98234	7.40946	3.54757	Distal Intergenic	1099564	ENSG00000170571	embigin
chr5	43063242	43063547	306	LOC100506639	4.42036	7.40112	3.54639	Promoter (1-2kb)	-1629	NA	uncharacterized LOC100506639
chr17	73011073	73011352	280	SLC39A11	4.23691	7.35426	3.50117	Intron (ENST00000255559.8/201266, intron 4 of 9)	-18124	ENSG00000133195	solute carrier family 39 member 11
chr11	46392796	46393105	310	CHRM4	4.23691	7.35426	3.50117	Promoter (1-2kb)	-1020	ENSG00000180720	cholinergic receptor muscarinic 4
chr19	18303301	18303843	543	LSM4	3.94619	7.33488	3.48273	Distal Intergenic	12416	ENSG00000130520	LSM4 homolog, U6 small nuclear RNA and mRNA degradation associated
chr16	1773033	1773400	368	EME2	3.41037	7.32779	3.4757	Promoter (<=1kb)	0	ENSG00000197774	essential meiotic structure-specific endonuclease subunit 2
chr3	88058630	88058971	342	CGGBP1	3.70107	7.32117	3.46936	Promoter (<=1kb)	0	ENSG00000163320	CGG triplet repeat binding protein 1
chr8	144852504	144852888	385	COMMD5	2.69898	7.30847	3.45824	Promoter (<=1kb)	0	ENSG00000170619	COMM domain containing 5
chr19	38619240	38619564	325	EIF3K	3.92969	7.30075	3.45101	Promoter (<=1kb)	29	ENSG00000178982	eukaryotic translation initiation factor 3 subunit K
chr1	20661034	20661400	367	DDOST	4.19291	7.27181	3.42297	Promoter (<=1kb)	0	ENSG00000244038	dolichyl-diphosphooligosaccharide--protein glycosyltransferase non-catalytic subunit
chr1	100894782	100895091	310	EXTL2	4.19291	7.27181	3.42297	Promoter (<=1kb)	0	ENSG00000162694	exostosin like glycosyltransferase 2
chr1	111139688	111140025	338	CEPT1	4.19291	7.27181	3.42297	Promoter (<=1kb)	0	ENSG00000134255	choline/ethanolamine phosphotransferase 1
chr1	155261963	155262246	284	SCAMP3	4.19291	7.27181	3.42297	Promoter (<=1kb)	0	ENSG00000116521	secretory carrier membrane protein 3
chr12	110582347	110582734	388	PPTC7	4.19291	7.27181	3.42297	Promoter (<=1kb)	584	ENSG00000196850	protein phosphatase targeting COQ7
chr15	101651857	101652224	368	TM2D3	4.19291	7.27181	3.42297	Promoter (<=1kb)	0	ENSG00000184277	TM2 domain containing 3
chr16	75463890	75464209	320	TMEM170A	4.19291	7.27181	3.42297	Promoter (<=1kb)	207	ENSG00000166822	transmembrane protein 170A
chr2	219252885	219253493	609	TUBA4A	4.19291	7.27181	3.42297	Promoter (<=1kb)	0	ENSG00000127824	tubulin alpha 4a
chr20	47357140	47357622	483	ZMYND8	4.19291	7.27181	3.42297	Promoter (<=1kb)	-251	ENSG00000101040	zinc finger MYND-type containing 8
chr22	36482267	36482563	297	TXN2	4.19291	7.27181	3.42297	Promoter (<=1kb)	-627	ENSG00000100348	thioredoxin 2
chr3	46987790	46988205	416	NBEAL2	4.19291	7.27181	3.42297	Promoter (<=1kb)	0	ENSG00000160796	neurobeachin like 2
chr6	37819182	37819701	520	ZFAND3-DT	4.19291	7.27181	3.42297	Promoter (<=1kb)	0	NA	ZFAND3 divergent transcript
chr9	100352570	100352863	294	TEX10	4.19291	7.27181	3.42297	Promoter (<=1kb)	0	ENSG00000136891	testis expressed 10
chr9	125706794	125707186	393	MAPKAP1	4.19291	7.27181	3.42297	Promoter (<=1kb)	0	ENSG00000119487	MAPK associated protein 1
chr1	176206767	176207177	411	COP1	4.50714	7.26115	3.42002	Promoter (<=1kb)	0	ENSG00000143207	COP1 E3 ubiquitin ligase
chr1	154182457	154183107	651	TPM3	3.78418	7.25298	3.41411	Promoter (<=1kb)	0	ENSG00000143549	tropomyosin 3
chr7	99408724	99409190	467	BUD31	3.78418	7.25298	3.41411	Promoter (<=1kb)	0	ENSG00000106245	BUD31 homolog
chr8	141000281	141000582	302	PTK2	3.78418	7.25298	3.41411	Promoter (<=1kb)	344	ENSG00000169398	protein tyrosine kinase 2
chr17	61216818	61217146	329	BCAS3	4.49876	7.24679	3.40902	Intron (ENST00000407086.8/54828, intron 22 of 23)	-28070	ENSG00000141376	BCAS3 microtubule associated cell migration factor
chr22	13470597	13470887	291	LOC107984037	4.49876	7.24679	3.40902	Distal Intergenic	1643074	NA	uncharacterized LOC107984037
chr22	14133110	14133449	340	OR11H1	4.49876	7.24679	3.40902	Distal Intergenic	-1394743	ENSG00000130538	olfactory receptor family 11 subfamily H member 1
chr15	89244037	89244309	273	FANCI	4.49876	7.24679	3.40902	Promoter (<=1kb)	0	ENSG00000140525	FA complementation group I
chr20	36605781	36606298	518	RAB5IF	4.49876	7.24679	3.40902	Promoter (<=1kb)	0	ENSG00000101084	RAB5 interacting factor
chr7	37448372	37448662	291	ELMO1	4.49876	7.24679	3.40902	Promoter (<=1kb)	194	ENSG00000155849	engulfment and cell motility 1
chr8	133570092	133570362	271	ST3GAL1	3.45847	7.22167	3.39204	Promoter (<=1kb)	17	ENSG00000008513	ST3 beta-galactoside alpha-2,3-sialyltransferase 1
chr10	72354477	72354851	375	DNAJB12	3.88102	7.19971	3.37115	Promoter (<=1kb)	68	ENSG00000148719	DnaJ heat shock protein family (Hsp40) member B12
chr12	51323998	51324530	533	BIN2	3.54255	7.19391	3.36737	Promoter (<=1kb)	0	ENSG00000110934	bridging integrator 2
chr14	68978572	68979019	448	ACTN1	3.54255	7.19391	3.36737	Promoter (<=1kb)	0	ENSG00000072110	actinin alpha 1
chr20	23637502	23637939	438	CST3	3.54255	7.19391	3.36737	Promoter (<=1kb)	6	ENSG00000101439	cystatin C
chr6	90586971	90587293	323	MAP3K7	3.54255	7.19391	3.36737	Promoter (<=1kb)	0	ENSG00000135341	mitogen-activated protein kinase kinase kinase 7
chr1	122518021	122518358	338	LINC01691	2.44303	7.18747	3.36493	Distal Intergenic	-937497	NA	long intergenic non-protein coding RNA 1691
chr1	1746409	1746985	577	SLC35E2A	4.29907	7.1842	3.36187	Promoter (<=1kb)	-417	NA	solute carrier family 35 member E2A
[truncated: 321 more rows]

## Sheet: H3K27ac ChIP Seq 
seqnames	start	end	width	SYMBOL	fold-change	-log10pvalue	-log10qvalue	annotation	distanceToTSS	ENSEMBL	GENENAME
[truncated: 16,349 more rows]
